# Supplementary material for: Comprehensive multiphase chlorine chemistry in the box model CAABA/MECCA: Implications to atmospheric oxidative capacity
Source: Copernicus journal article supplement (doi:10.5194/egusphere-2023-652), 2023-04-26
Supplement: Supplementary file 1 [file egusphere-2023-652-supplement.zip]

# The Chemical Mechanism of MECCA

KPP version: 2.2.3\_rs3

MECCA version: 4.4.2

Date: 2023-03-22

MECCA config (\*.ini) file: delhi.ini

Integrator: rosenbrock\_posdef

Gas equation file: gas.eqn

Replacement file:

Selected reactions:

“Tr and (G or (Aa or Mb1)) and not I and not Hg”

Number of aerosol phases: 1

Number of species in selected mechanism:

Gas phase: 671

Aqueous phase: 462

All species: 1133

Number of reactions in selected mechanism:  
Gas phase (Gnn): 1741

Aqueous phase (Annn): 385

Henry (Hnnn): 713

Photolysis (Jnnn): 348

Aqueous phase photolysis (PHnnn): 26

Heterogeneous (HETnnn): 0

Equilibria (EQnn): 112

Isotope exchange (IEXnnn): 0

Tagging equations (TAGnnn): 0

Dummy (Dnn): 1

All equations: 3326

Table 1: Gas phase reactions

| #      | labels   | reaction                                  | rate coefficient                                             | reference                 |
|--------|----------|-------------------------------------------|--------------------------------------------------------------|---------------------------|
| G1000  | UpStTrG  | $O_2 + O(^1D) \rightarrow O(^3P) + O_2$   | $3.3E-11*EXP(55./temp)$                                      | Burkholder et al. (2015)  |
| G1001  | UpStTrG  | $O_2 + O(^3P) \rightarrow O_3$            | $6.0E-34*((temp/300.)**(-2.4))$<br>*cair                     | Burkholder et al. (2015)  |
| G2100  | UpStTrG  | $H + O_2 \rightarrow HO_2$                | $k\_3rd(temp, cair, 4.4E-32, 1.3,$<br>$7.5E-11, -0.2, 0.6)$  | Burkholder et al. (2015)  |
| G2104  | UpStTrG  | $OH + O_3 \rightarrow HO_2 + O_2$         | $1.7E-12*EXP(-940./temp)$                                    | Burkholder et al. (2015)  |
| G2105  | UpStTrG  | $OH + H_2 \rightarrow H_2O + H$           | $2.8E-12*EXP(-1800./temp)$                                   | Burkholder et al. (2015)  |
| G2107  | UpStTrG  | $HO_2 + O_3 \rightarrow OH + 2 O_2$       | $1.E-14*EXP(-490./temp)$                                     | Burkholder et al. (2015)  |
| G2109  | UpStTrG  | $HO_2 + OH \rightarrow H_2O + O_2$        | $4.8E-11*EXP(250./temp)$                                     | Burkholder et al. (2015)  |
| G2110  | UpStTrG  | $HO_2 + HO_2 \rightarrow H_2O_2 + O_2$    | k_HO2_HO2                                                    | Burkholder et al. (2015)* |
| G2111  | UpStTrG  | $H_2O + O(^1D) \rightarrow 2 OH$          | $1.63E-10*EXP(60./temp)$                                     | Burkholder et al. (2015)  |
| G2112  | UpStTrG  | $H_2O_2 + OH \rightarrow H_2O + HO_2$     | 1.8E-12                                                      | Burkholder et al. (2015)  |
| G2117  | UpStTrG  | $H_2O + H_2O \rightarrow (H_2O)_2$        | $6.521E-26*temp*EXP(1851.09/temp)$<br>*EXP(-5.10485E-3*temp) | Scribano et al. (2006)*   |
| G2118  | UpStTrG  | $(H_2O)_2 \rightarrow H_2O + H_2O$        | 1.E0                                                         | see note*                 |
| G3101  | UpStTrGN | $N_2 + O(^1D) \rightarrow O(^3P) + N_2$   | $2.15E-11*EXP(110./temp)$                                    | Burkholder et al. (2015)  |
| G3103  | UpStTrGN | $NO + O_3 \rightarrow NO_2 + O_2$         | $3.0E-12*EXP(-1500./temp)$                                   | Burkholder et al. (2015)  |
| G3106  | StTrGN   | $NO_2 + O_3 \rightarrow NO_3 + O_2$       | $1.2E-13*EXP(-2450./temp)$                                   | Burkholder et al. (2015)  |
| G3108  | StTrGN   | $NO_3 + NO \rightarrow 2 NO_2$            | $1.5E-11*EXP(170./temp)$                                     | Burkholder et al. (2015)  |
| G3109  | UpStTrGN | $NO_3 + NO_2 \rightarrow N_2O_5$          | k_N03_N02                                                    | Burkholder et al. (2015)* |
| G3110  | StTrGN   | $N_2O_5 \rightarrow NO_2 + NO_3$          | $k\_N03\_N02/(5.8E-27*EXP(10840./$<br>$temp))$               | Burkholder et al. (2015)* |
| G3200  | TrGN     | $NO + OH \rightarrow HONO$                | $k\_3rd(temp, cair, 7.0E-31, 2.6,$<br>$3.6E-11, 0.1, 0.6)$   | Burkholder et al. (2015)  |
| G3201  | UpStTrGN | $NO + HO_2 \rightarrow NO_2 + OH$         | $3.3E-12*EXP(270./temp)$                                     | Burkholder et al. (2015)  |
| G3202a | UpStTrGN | $NO_2 + OH \rightarrow HNO_3$             | $(1.-alpha\_H00N0) * k\_N02\_OH$                             | Amedro et al. (2020)      |
| G3202b | UpStTrGN | $NO_2 + OH \rightarrow HOONO$             | $alpha\_H00N0 * k\_N02\_OH$                                  | Amedro et al. (2020)      |
| G3203  | StTrGN   | $NO_2 + HO_2 \rightarrow HNO_4$           | k_N02_HO2                                                    | Burkholder et al. (2015)* |
| G3204  | TrGN     | $NO_3 + HO_2 \rightarrow NO_2 + OH + O_2$ | 3.5E-12                                                      | Burkholder et al. (2015)  |
| G3205  | TrGN     | $HONO + OH \rightarrow NO_2 + H_2O$       | $1.8E-11*EXP(-390./temp)$                                    | Burkholder et al. (2015)  |
| G3206  | StTrGN   | $HNO_3 + OH \rightarrow H_2O + NO_3$      | k_HN03_OH                                                    | Dulitz et al. (2018)*     |
| G3207  | StTrGN   | $HNO_4 \rightarrow NO_2 + HO_2$           | $k\_N02\_HO2/(2.1E-27*EXP(10900./$<br>$temp))$               | Burkholder et al. (2015)* |
| G3208  | StTrGN   | $HNO_4 + OH \rightarrow NO_2 + H_2O$      | $1.3E-12*EXP(380./temp)$                                     | Burkholder et al. (2015)  |

Table 1: Gas phase reactions (... continued)

| #      | labels   | reaction                                                                                                                        | rate coefficient                                                                                         | reference                                                                |
|--------|----------|---------------------------------------------------------------------------------------------------------------------------------|----------------------------------------------------------------------------------------------------------|--------------------------------------------------------------------------|
| G3209  | TrGN     | $\text{NH}_3 + \text{OH} \rightarrow \text{NH}_2 + \text{H}_2\text{O}$                                                          | $1.7\text{E}-12 \cdot \text{EXP}(-710./\text{temp})$                                                     | Kohlmann and Poppe (1999)                                                |
| G3210  | TrGN     | $\text{NH}_2 + \text{O}_3 \rightarrow \text{NH}_2\text{O} + \text{O}_2$                                                         | $4.3\text{E}-12 \cdot \text{EXP}(-930./\text{temp})$                                                     | Kohlmann and Poppe (1999)                                                |
| G3211  | TrGN     | $\text{NH}_2 + \text{HO}_2 \rightarrow \text{NH}_2\text{O} + \text{OH}$                                                         | $4.8\text{E}-07 \cdot \text{EXP}(-628./\text{temp}) \cdot (\text{temp})^{**(-1.32)}$                     | Kohlmann and Poppe (1999)                                                |
| G3212  | TrGN     | $\text{NH}_2 + \text{HO}_2 \rightarrow \text{HNO} + \text{H}_2\text{O}$                                                         | $9.4\text{E}-09 \cdot \text{EXP}(-356./\text{temp}) \cdot (\text{temp})^{**(-1.12)}$                     | Kohlmann and Poppe (1999)                                                |
| G3213  | TrGN     | $\text{NH}_2 + \text{NO} \rightarrow \text{HO}_2 + \text{OH} + \text{N}_2$                                                      | $1.92\text{E}-12 \cdot ((\text{temp}/298.)^{**(-1.5)})$                                                  | Kohlmann and Poppe (1999)                                                |
| G3214  | TrGN     | $\text{NH}_2 + \text{NO} \rightarrow \text{N}_2 + \text{H}_2\text{O}$                                                           | $1.41\text{E}-11 \cdot ((\text{temp}/298.)^{**(-1.5)})$                                                  | Kohlmann and Poppe (1999)                                                |
| G3215  | TrGN     | $\text{NH}_2 + \text{NO}_2 \rightarrow \text{N}_2\text{O} + \text{H}_2\text{O}$                                                 | $1.2\text{E}-11 \cdot ((\text{temp}/298.)^{**(-2.0)})$                                                   | Kohlmann and Poppe (1999)                                                |
| G3216  | TrGN     | $\text{NH}_2 + \text{NO}_2 \rightarrow \text{NH}_2\text{O} + \text{NO}$                                                         | $0.8\text{E}-11 \cdot ((\text{temp}/298.)^{**(-2.0)})$                                                   | Kohlmann and Poppe (1999)                                                |
| G3217  | TrGN     | $\text{NH}_2\text{O} + \text{O}_3 \rightarrow \text{NH}_2 + \text{O}_2$                                                         | $1.2\text{E}-14$                                                                                         | Kohlmann and Poppe (1999)                                                |
| G3218  | TrGN     | $\text{NH}_2\text{O} \rightarrow \text{NHOH}$                                                                                   | $1.3\text{E}3$                                                                                           | Kohlmann and Poppe (1999)                                                |
| G3219  | TrGN     | $\text{HNO} + \text{OH} \rightarrow \text{NO} + \text{H}_2\text{O}$                                                             | $8.0\text{E}-11 \cdot \text{EXP}(-500./\text{temp})$                                                     | Kohlmann and Poppe (1999)                                                |
| G3220  | TrGN     | $\text{HNO} + \text{NHOH} \rightarrow \text{NH}_2\text{OH} + \text{NO}$                                                         | $1.66\text{E}-12 \cdot \text{EXP}(-1500./\text{temp})$                                                   | Kohlmann and Poppe (1999)                                                |
| G3221  | TrGN     | $\text{HNO} + \text{NO}_2 \rightarrow \text{HONO} + \text{NO}$                                                                  | $1.0\text{E}-12 \cdot \text{EXP}(-1000./\text{temp})$                                                    | Kohlmann and Poppe (1999)                                                |
| G3222  | TrGN     | $\text{NHOH} + \text{OH} \rightarrow \text{HNO} + \text{H}_2\text{O}$                                                           | $1.66\text{E}-12$                                                                                        | Kohlmann and Poppe (1999)                                                |
| G3223  | TrGN     | $\text{NH}_2\text{OH} + \text{OH} \rightarrow \text{NHOH} + \text{H}_2\text{O}$                                                 | $4.13\text{E}-11 \cdot \text{EXP}(-2138./\text{temp})$                                                   | Kohlmann and Poppe (1999)                                                |
| G3224  | TrGN     | $\text{HNO} + \text{O}_2 \rightarrow \text{HO}_2 + \text{NO}$                                                                   | $3.65\text{E}-14 \cdot \text{EXP}(-4600./\text{temp})$                                                   | Kohlmann and Poppe (1999)                                                |
| G3227  | UpStTrGN | $\text{HOONO} \rightarrow \text{NO}_2 + \text{OH}$                                                                              | $(\text{alpha\_HOONO} \cdot \text{k\_NO2\_OH}) / (3.5\text{E}-27 \cdot \text{EXP}(10135./\text{temp}))$  | see note*                                                                |
| G3228  | UpStTrGN | $\text{HOONO} + \text{OH} \rightarrow \text{H}_2\text{O} + \text{NO}_3$                                                         | $1.3\text{E}-12 \cdot \text{EXP}(380./\text{temp})$                                                      | Burkholder et al. (2015)*                                                |
| G4101  | StTrG    | $\text{CH}_4 + \text{OH} \rightarrow \text{CH}_3 + \text{H}_2\text{O}$                                                          | $1.85\text{E}-20 \cdot \text{EXP}(2.82 \cdot \text{LOG}(\text{temp}) - 987./\text{temp})$                | Atkinson (2003)                                                          |
| G4102  | TrG      | $\text{CH}_3\text{OH} + \text{OH} \rightarrow .85 \text{HCHO} + .85 \text{HO}_2 + .15 \text{CH}_3\text{O} + \text{H}_2\text{O}$ | $6.38\text{E}-18 \cdot ((\text{temp})^{**2}) \cdot \text{EXP}(144./\text{temp})$                         | Atkinson et al. (2006)                                                   |
| G4103a | StTrG    | $\text{CH}_3\text{O}_2 + \text{HO}_2 \rightarrow \text{CH}_3\text{OOH} + \text{O}_2$                                            | $3.8\text{E}-13 \cdot \text{EXP}(780./\text{temp}) / (1. + 1./498. \cdot \text{EXP}(1160./\text{temp}))$ | Atkinson et al. (2006)                                                   |
| G4103b | StTrG    | $\text{CH}_3\text{O}_2 + \text{HO}_2 \rightarrow \text{HCHO} + \text{H}_2\text{O} + \text{O}_2$                                 | $3.8\text{E}-13 \cdot \text{EXP}(780./\text{temp}) / (1. + 498. \cdot \text{EXP}(-1160./\text{temp}))$   | Atkinson et al. (2006)                                                   |
| G4104a | StTrGN   | $\text{CH}_3\text{O}_2 + \text{NO} \rightarrow \text{CH}_3\text{O} + \text{NO}_2$                                               | $2.3\text{E}-12 \cdot \text{EXP}(360./\text{temp}) \cdot (1. - \text{beta\_CH3NO3})$                     | Atkinson et al. (2006), Butkovskaya et al. (2012), Flocke et al. (1998)  |
| G4104b | StTrGN   | $\text{CH}_3\text{O}_2 + \text{NO} \rightarrow \text{CH}_3\text{ONO}_2$                                                         | $2.3\text{E}-12 \cdot \text{EXP}(360./\text{temp}) \cdot \text{beta\_CH3NO3}$                            | Atkinson et al. (2006), Butkovskaya et al. (2012), Flocke et al. (1998)* |

Table 1: Gas phase reactions (... continued)

| #      | labels  | reaction                                                                                                                                                                 | rate coefficient                                                                                                                                  | reference                 |
|--------|---------|--------------------------------------------------------------------------------------------------------------------------------------------------------------------------|---------------------------------------------------------------------------------------------------------------------------------------------------|---------------------------|
| G4105  | TrGN    | $\text{CH}_3\text{O}_2 + \text{NO}_3 \rightarrow \text{CH}_3\text{O} + \text{NO}_2 + \text{O}_2$                                                                         | 1.2E-12                                                                                                                                           | Atkinson et al. (2006)    |
| G4106a | StTrG   | $\text{CH}_3\text{O}_2 \rightarrow \text{CH}_3\text{O} + .5 \text{O}_2$                                                                                                  | $7.4\text{E-}13 \cdot \text{EXP}(-520./\text{temp}) \cdot \text{R02} \cdot 2.$                                                                    | Atkinson et al. (2006)    |
| G4106b | StTrG   | $\text{CH}_3\text{O}_2 \rightarrow .5 \text{HCHO} + .5 \text{CH}_3\text{OH} + .5 \text{O}_2$                                                                             | $(\text{k\_CH302} - 7.4\text{E-}13 \cdot \text{EXP}(-520./\text{temp})) \cdot \text{R02} \cdot 2.$                                                | Atkinson et al. (2006)    |
| G4107  | StTrG   | $\text{CH}_3\text{OOH} + \text{OH} \rightarrow .6 \text{CH}_3\text{O}_2 + .4 \text{HCHO} + .4 \text{OH} + \text{H}_2\text{O}$                                            | k_CH300H_OH                                                                                                                                       | Wallington et al. (2018)  |
| G4108  | StTrG   | $\text{HCHO} + \text{OH} \rightarrow \text{CO} + \text{H}_2\text{O} + \text{HO}_2$                                                                                       | $9.52\text{E-}18 \cdot \text{EXP}(2.03 \cdot \text{LOG}(\text{temp}) + 636./\text{temp})$                                                         | Sivakumaran et al. (2003) |
| G4109  | TrGN    | $\text{HCHO} + \text{NO}_3 \rightarrow \text{HNO}_3 + \text{CO} + \text{HO}_2$                                                                                           | $3.4\text{E-}13 \cdot \text{EXP}(-1900./\text{temp})$                                                                                             | Burkholder et al. (2015)* |
| G4110  | UpStTrG | $\text{CO} + \text{OH} \rightarrow \text{H} + \text{CO}_2$                                                                                                               | $(1.57\text{E-}13 + \text{cair} \cdot 3.54\text{E-}33)$                                                                                           | McCabe et al. (2001)      |
| G4111  | TrG     | $\text{HCOOH} + \text{OH} \rightarrow \text{CO}_2 + \text{HO}_2 + \text{H}_2\text{O}$                                                                                    | $2.94\text{E-}14 \cdot \text{exp}(786./\text{temp}) + 9.85\text{E-}13 \cdot \text{EXP}(-1036./\text{temp})$                                       | Paulot et al. (2011)      |
| G4114  | StTrGN  | $\text{CH}_3\text{O}_2 + \text{NO}_2 \rightarrow \text{CH}_3\text{O}_2\text{NO}_2$                                                                                       | k_N02_CH302                                                                                                                                       | Burkholder et al. (2015)  |
| G4115  | StTrGN  | $\text{CH}_3\text{O}_2\text{NO}_2 \rightarrow \text{CH}_3\text{O}_2 + \text{NO}_2$                                                                                       | $\text{k\_N02\_CH302} / (9.5\text{E-}29 \cdot \text{EXP}(11234./\text{temp}))$                                                                    | Burkholder et al. (2015)* |
| G4116  | StTrGN  | $\text{CH}_3\text{O}_2\text{NO}_2 + \text{OH} \rightarrow \text{HCHO} + \text{NO}_3 + \text{H}_2\text{O}$                                                                | 3.00E-14                                                                                                                                          | see note*                 |
| G4117  | StTrGN  | $\text{CH}_3\text{ONO}_2 + \text{OH} \rightarrow \text{H}_2\text{O} + \text{HCHO} + \text{NO}_2$                                                                         | $4.0\text{E-}13 \cdot \text{EXP}(-845./\text{temp})$                                                                                              | Atkinson et al. (2006)    |
| G4118  | StTrG   | $\text{CH}_3\text{O} \rightarrow \text{HO}_2 + \text{HCHO}$                                                                                                              | $1.3\text{E-}14 \cdot \text{exp}(-663./\text{temp}) \cdot \text{c}(\text{ind\_02})$                                                               | Chai et al. (2014)        |
| G4119a | StTrGN  | $\text{CH}_3\text{O} + \text{NO}_2 \rightarrow \text{CH}_3\text{ONO}_2$                                                                                                  | $\text{k\_3rd\_iupac}(\text{temp}, \text{cair}, 8.1\text{E-}29, 4.5, 2.1\text{E-}11, 0., 0.44)$                                                   | Atkinson et al. (2006)    |
| G4119b | StTrGN  | $\text{CH}_3\text{O} + \text{NO}_2 \rightarrow \text{HCHO} + \text{HONO}$                                                                                                | $9.6\text{E-}12 \cdot \text{EXP}(-1150./\text{temp})$                                                                                             | Atkinson et al. (2006)    |
| G4120a | StTrGN  | $\text{CH}_3\text{O} + \text{NO} \rightarrow \text{CH}_3\text{ONO}$                                                                                                      | $\text{k\_3rd\_iupac}(\text{temp}, \text{cair}, 2.6\text{E-}29, 2.8, 3.3\text{E-}11, 0.6, \text{REAL}(\text{EXP}(-\text{temp}/900.), \text{SP}))$ | Atkinson et al. (2006)    |
| G4120b | StTrGN  | $\text{CH}_3\text{O} + \text{NO} \rightarrow \text{HCHO} + \text{HNO}$                                                                                                   | $2.3\text{E-}12 \cdot (\text{temp}/300.)^{**}(0.7)$                                                                                               | Atkinson et al. (2006)    |
| G4121  | StTrG   | $\text{CH}_3\text{O}_2 + \text{O}_3 \rightarrow \text{CH}_3\text{O} + 2 \text{O}_2$                                                                                      | $2.9\text{E-}16 \cdot \text{exp}(-1000./\text{temp})$                                                                                             | Burkholder et al. (2015)  |
| G4122  | StTrGN  | $\text{CH}_3\text{ONO} + \text{OH} \rightarrow \text{H}_2\text{O} + \text{HCHO} + \text{NO}$                                                                             | $1\text{E-}10 \cdot \text{exp}(-1764./\text{temp})$                                                                                               | Nielsen et al. (1991)     |
| G4123  | StTrG   | $\text{HCHO} + \text{HO}_2 \rightarrow \text{HOCH}_2\text{O}_2$                                                                                                          | $9.7\text{E-}15 \cdot \text{EXP}(625./\text{temp})$                                                                                               | Atkinson et al. (2006)    |
| G4124  | StTrG   | $\text{HOCH}_2\text{O}_2 \rightarrow \text{HCHO} + \text{HO}_2$                                                                                                          | $2.4\text{E}12 \cdot \text{EXP}(-7000./\text{temp})$                                                                                              | Atkinson et al. (2006)    |
| G4125  | StTrG   | $\text{HOCH}_2\text{O}_2 + \text{HO}_2 \rightarrow .5 \text{HOCH}_2\text{OOH} + .5 \text{HCOOH} + .2 \text{OH} + .2 \text{HO}_2 + .3 \text{H}_2\text{O} + .8 \text{O}_2$ | $5.6\text{E-}15 \cdot \text{EXP}(2300./\text{temp})$                                                                                              | Atkinson et al. (2006)    |
| G4126  | StTrGN  | $\text{HOCH}_2\text{O}_2 + \text{NO} \rightarrow \text{NO}_2 + \text{HO}_2 + \text{HCOOH}$                                                                               | $0.7275 \cdot 2.3\text{E-}12 \cdot \text{EXP}(360./\text{temp})$                                                                                  | Atkinson et al. (2006)*   |
| G4127  | StTrGN  | $\text{HOCH}_2\text{O}_2 + \text{NO}_3 \rightarrow \text{NO}_2 + \text{HO}_2 + \text{HCOOH}$                                                                             | 1.2E-12                                                                                                                                           | see note*                 |
| G4129a | StTrG   | $\text{HOCH}_2\text{O}_2 \rightarrow \text{HCOOH} + \text{HO}_2$                                                                                                         | $(\text{k\_CH302} \cdot 5.5\text{E-}12)^{**}(0.5) \cdot \text{R02} \cdot 2.$                                                                      | Atkinson et al. (2006)    |
| G4129b | StTrG   | $\text{HOCH}_2\text{O}_2 \rightarrow .5 \text{HCOOH} + .5 \text{HOCH}_2\text{OH} + .5 \text{O}_2$                                                                        | $(\text{k\_CH302} \cdot 5.7\text{E-}14 \cdot \text{EXP}(750./\text{temp}))^{**}(0.5) \cdot \text{R02} \cdot 2.$                                   | Atkinson et al. (2006)    |

Table 1: Gas phase reactions (... continued)

| #      | labels | reaction                                                                                                                        | rate coefficient                                                                                  | reference                                       |
|--------|--------|---------------------------------------------------------------------------------------------------------------------------------|---------------------------------------------------------------------------------------------------|-------------------------------------------------|
| G4130a | StTrG  | $\text{HOCH}_2\text{OOH} + \text{OH} \rightarrow \text{HOCH}_2\text{O}_2 + \text{H}_2\text{O}$                                  | $k_{\text{ROOHR O}}$                                                                              | Taraborrelli (2010)*                            |
| G4130b | StTrG  | $\text{HOCH}_2\text{OOH} + \text{OH} \rightarrow \text{HCOOH} + \text{H}_2\text{O} + \text{OH}$                                 | $k_{\text{ROHR O}} + k_{\text{s*f_sOOH*f_sOH}}$                                                   | Taraborrelli (2010)*                            |
| G4132  | StTrG  | $\text{HOCH}_2\text{OH} + \text{OH} \rightarrow \text{HO}_2 + \text{HCOOH} + \text{H}_2\text{O}$                                | $2.*k_{\text{ROHR O}} + k_{\text{s*f_sOH*f_sOH}}$                                                 | Taraborrelli (2010)*                            |
| G4133  | StTrG  | $\text{CH}_3\text{O}_2 + \text{OH} \rightarrow \text{CH}_3\text{O} + \text{HO}_2$                                               | $1.4\text{E}-10$                                                                                  | Bossolasco et al. (2014)*                       |
| G4134  | StTrG  | $\text{CH}_2\text{OO} \rightarrow \text{CO} + \text{HO}_2 + \text{OH}$                                                          | $1.124\text{E}+14*\text{EXP}(-10000./\text{temp})$                                                | see note*                                       |
| G4135  | StTrG  | $\text{CH}_2\text{OO} + \text{H}_2\text{O} \rightarrow \text{HOCH}_2\text{OOH}$                                                 | $k_{\text{CH200\_N02}}*3.6\text{E}-6$                                                             | Ouyang et al. (2013)*                           |
| G4136  | StTrG  | $\text{CH}_2\text{OO} + (\text{H}_2\text{O})_2 \rightarrow \text{HOCH}_2\text{OOH} + \text{H}_2\text{O}$                        | $5.2\text{E}-12$                                                                                  | Chao et al. (2015), Lewis et al. (2015)*        |
| G4137  | StTrGN | $\text{CH}_2\text{OO} + \text{NO} \rightarrow \text{HCHO} + \text{NO}_2$                                                        | $6.\text{E}-14$                                                                                   | Welz et al. (2012)*                             |
| G4138  | StTrGN | $\text{CH}_2\text{OO} + \text{NO}_2 \rightarrow \text{HCHO} + \text{NO}_3$                                                      | $k_{\text{CH200\_N02}}$                                                                           | Welz et al. (2012), Stone et al. (2014)*        |
| G4140  | StTrG  | $\text{CH}_2\text{OO} + \text{CO} \rightarrow \text{HCHO} + \text{CO}_2$                                                        | $3.6\text{E}-14$                                                                                  | Vereecken et al. (2012)                         |
| G4141  | StTrG  | $\text{CH}_2\text{OO} + \text{HCOOH} \rightarrow 2 \text{HCOOH}$                                                                | $1.\text{E}-10$                                                                                   | Welz et al. (2014)*                             |
| G4142  | StTrG  | $\text{CH}_2\text{OO} + \text{HCHO} \rightarrow 2 \text{LCARBON}$                                                               | $1.7\text{E}-12$                                                                                  | Stone et al. (2014)*                            |
| G4143  | StTrG  | $\text{CH}_2\text{OO} + \text{CH}_3\text{OH} \rightarrow 2 \text{LCARBON}$                                                      | $5.\text{E}-12$                                                                                   | Vereecken et al. (2012)*                        |
| G4144  | StTrG  | $\text{CH}_2\text{OO} + \text{CH}_3\text{O}_2 \rightarrow 2 \text{LCARBON}$                                                     | $5.\text{E}-12$                                                                                   | Vereecken et al. (2012)*                        |
| G4145  | StTrG  | $\text{CH}_2\text{OO} + \text{HO}_2 \rightarrow \text{LCARBON}$                                                                 | $5.\text{E}-12$                                                                                   | Vereecken et al. (2012)                         |
| G4146  | StTrG  | $\text{CH}_2\text{OO} + \text{O}_3 \rightarrow \text{HCHO} + 2 \text{O}_2$                                                      | $1.\text{E}-12$                                                                                   | Vereecken et al. (2014)                         |
| G4147  | StTrG  | $\text{CH}_2\text{OO} + \text{CH}_2\text{OO} \rightarrow 2 \text{HCHO} + \text{O}_2$                                            | $6.\text{E}-11$                                                                                   | Buras et al. (2014)                             |
| G4148  | StTrGN | $\text{HOCH}_2\text{O}_2 + \text{NO}_2 \rightarrow \text{HOCH}_2\text{O}_2\text{NO}_2$                                          | $k_{\text{N02\_CH302}}$                                                                           | see note*                                       |
| G4149  | StTrGN | $\text{HOCH}_2\text{O}_2\text{NO}_2 \rightarrow \text{HOCH}_2\text{O}_2 + \text{NO}_2$                                          | $k_{\text{N02\_CH302}}/(9.5\text{E}-29*\text{EXP}(11234./\text{temp}))$                           | Barnes et al. (1985)*                           |
| G4150  | StTrGN | $\text{HOCH}_2\text{O}_2\text{NO}_2 + \text{OH} \rightarrow \text{HCOOH} + \text{NO}_3 + \text{H}_2\text{O}$                    | $9.50\text{E}-13*\text{EXP}(-650./\text{temp})*f_{\text{sOH}}$                                    | see note*                                       |
| G4151  | StTrG  | $\text{CH}_3 + \text{O}_2 \rightarrow \text{CH}_3\text{O}_2$                                                                    | $k_{\text{3rd\_iupac}}(\text{temp}, \text{cair}, 7.0\text{E}-31, 3., 1.8\text{E}-12, -1.1, 0.33)$ | Atkinson et al. (2006)                          |
| G4152  | StTrG  | $\text{CH}_3 + \text{O}_3 \rightarrow .956 \text{HCHO} + .956 \text{H} + .044 \text{CH}_3\text{O} + \text{O}_2$                 | $5.1\text{E}-12*\text{exp}(-210./\text{temp})$                                                    | Albaladejo et al. (2002), Ogryzlo et al. (1981) |
| G4153  | StTrG  | $\text{CH}_3 + \text{O}(^3\text{P}) \rightarrow .83 \text{HCHO} + .83 \text{H} + .17 \text{CO} + .17 \text{H}_2 + .17 \text{H}$ | $1.3\text{E}-10$                                                                                  | Atkinson et al. (2006)                          |
| G4154  | StTrG  | $\text{CH}_3\text{O} + \text{O}_3 \rightarrow \text{CH}_3\text{O}_2 + \text{O}_2$                                               | $2.53\text{E}-14$                                                                                 | Albaladejo et al. (2002)*                       |
| G4155  | StTrG  | $\text{CH}_3\text{O} + \text{O}(^3\text{P}) \rightarrow .75 \text{CH}_3 + .75 \text{O}_2 + .25 \text{HCHO} + .25 \text{OH}$     | $2.5\text{E}-11$                                                                                  | Baulch et al. (2005)                            |
| G4156  | StTrG  | $\text{CH}_3\text{O}_2 + \text{O}(^3\text{P}) \rightarrow \text{CH}_3\text{O} + \text{O}_2$                                     | $4.3\text{E}-11$                                                                                  | Zellner et al. (1988)                           |
| G4157  | StTrG  | $\text{HCHO} + \text{O}(^3\text{P}) \rightarrow .7 \text{OH} + .7 \text{CO} + .3 \text{H} + .3 \text{CO}_2 + \text{HO}_2$       | $3.4\text{E}-11*\text{EXP}(-1600./\text{temp})$                                                   | Burkholder et al. (2015)                        |

Table 1: Gas phase reactions (... continued)

| #       | labels | reaction                                                                                                                                                 | rate coefficient                                                                                                                                     | reference                                         |
|---------|--------|----------------------------------------------------------------------------------------------------------------------------------------------------------|------------------------------------------------------------------------------------------------------------------------------------------------------|---------------------------------------------------|
| G4158   | TrG    | $\text{CH}_2\text{OO}^* \rightarrow .37 \text{CH}_2\text{OO} + .47 \text{CO} + .47 \text{H}_2\text{O} + .16 \text{HO}_2 + .16 \text{CO} + .16 \text{OH}$ | KDEC                                                                                                                                                 | Atkinson et al. (2006)                            |
| G4159   | TrGN   | $\text{HCN} + \text{OH} \rightarrow \text{H}_2\text{O} + \text{CN}$                                                                                      | $k_{\text{3rd}}(\text{temp}, \text{cair}, 4.28\text{E-}33, 1.0, \text{REAL}(4.25\text{E-}13 * \text{EXP}(-1150./\text{temp}), \text{SP}), 1.0, 0.8)$ | Kleinböhl et al. (2006)                           |
| G4160a  | TrGN   | $\text{HCN} + \text{O}(^1\text{D}) \rightarrow \text{O}(^3\text{P}) + \text{HCN}$                                                                        | $1.08\text{E-}10 * \text{EXP}(105./\text{temp}) * 0.15 * \text{EXP}(200./\text{temp})$                                                               | Strekowski et al. (2010)                          |
| G4160b  | TrGN   | $\text{HCN} + \text{O}(^1\text{D}) \rightarrow \text{H} + \text{NCO}$                                                                                    | $1.08\text{E-}10 * \text{EXP}(105./\text{temp}) * 0.68/2.$                                                                                           | Strekowski et al. (2010)*                         |
| G4160c  | TrGN   | $\text{HCN} + \text{O}(^1\text{D}) \rightarrow \text{OH} + \text{CN}$                                                                                    | $1.08\text{E-}10 * \text{EXP}(105./\text{temp}) * (1. - (0.68/2. + 0.15 * \text{EXP}(200./\text{temp})))$                                            | Strekowski et al. (2010)*                         |
| G4161   | TrGN   | $\text{HCN} + \text{O}(^3\text{P}) \rightarrow \text{H} + \text{NCO}$                                                                                    | $1.0\text{E-}11 * \text{EXP}(-4000./\text{temp})$                                                                                                    | Burkholder et al. (2015)*                         |
| G4162   | TrGN   | $\text{CN} + \text{O}_2 \rightarrow \text{NCO} + \text{O}(^3\text{P})$                                                                                   | $1.2\text{E-}11 * \text{EXP}(210./\text{temp}) * 0.75$                                                                                               | Baulch et al. (2005)                              |
| G4163   | TrGN   | $\text{CN} + \text{O}_2 \rightarrow \text{CO} + \text{NO}$                                                                                               | $1.2\text{E-}11 * \text{EXP}(210./\text{temp}) * 0.25$                                                                                               | Baulch et al. (2005)                              |
| G4164   | TrGN   | $\text{NCO} + \text{O}_2 \rightarrow \text{CO}_2 + \text{NO}$                                                                                            | $7.\text{E-}15$                                                                                                                                      | Becker et al. (2000)*                             |
| G42000  | TrGC   | $\text{C}_2\text{H}_6 + \text{OH} \rightarrow \text{C}_2\text{H}_5\text{O}_2 + \text{H}_2\text{O}$                                                       | $1.49\text{E-}17 * \text{temp} * \text{temp} * \text{EXP}(-499./\text{temp})$                                                                        | Atkinson et al. (2006)                            |
| G42001  | TrGC   | $\text{C}_2\text{H}_4 + \text{O}_3 \rightarrow \text{HCHO} + \text{CH}_2\text{OO}^*$                                                                     | $9.1\text{E-}15 * \text{EXP}(-2580./\text{temp})$                                                                                                    | Atkinson et al. (2006)*                           |
| G42002  | TrGC   | $\text{C}_2\text{H}_4 + \text{OH} \rightarrow \text{HOCH}_2\text{CH}_2\text{O}_2$                                                                        | $k_{\text{3rd\_iupac}}(\text{temp}, \text{cair}, 8.6\text{E-}29, 3.1, 9.\text{E-}12, 0.85, 0.48)$                                                    | Atkinson et al. (2006), Rickard (2022)            |
| G42003  | TrGC   | $\text{C}_2\text{H}_5\text{O}_2 + \text{HO}_2 \rightarrow \text{C}_2\text{H}_5\text{OOH}$                                                                | $7.5\text{E-}13 * \text{EXP}(700./\text{temp})$                                                                                                      | Burkholder et al. (2015)                          |
| G42004a | TrGCN  | $\text{C}_2\text{H}_5\text{O}_2 + \text{NO} \rightarrow \text{CH}_3\text{CHO} + \text{HO}_2 + \text{NO}_2$                                               | $2.55\text{E-}12 * \text{EXP}(380./\text{temp}) * (1. - \text{beta\_C2H5NO3})$                                                                       | Atkinson et al. (2006), Butkovskaya et al. (2010) |
| G42004b | TrGCN  | $\text{C}_2\text{H}_5\text{O}_2 + \text{NO} \rightarrow \text{C}_2\text{H}_5\text{ONO}_2$                                                                | $2.55\text{E-}12 * \text{EXP}(380./\text{temp}) * \text{beta\_C2H5NO3}$                                                                              | Atkinson et al. (2006), Butkovskaya et al. (2010) |
| G42005  | TrGCN  | $\text{C}_2\text{H}_5\text{O}_2 + \text{NO}_3 \rightarrow \text{CH}_3\text{CHO} + \text{HO}_2 + \text{NO}_2$                                             | $2.3\text{E-}12$                                                                                                                                     | Wallington et al. (2018)                          |
| G42006  | TrGC   | $\text{C}_2\text{H}_5\text{O}_2 \rightarrow .8 \text{CH}_3\text{CHO} + .6 \text{HO}_2 + .2 \text{C}_2\text{H}_5\text{OH}$                                | $2. * (7.6\text{E-}14 * k_{\text{CH3O2}}) * (.5) * R02$                                                                                              | Sander et al. (2019), Atkinson et al. (2006)      |
| G42007a | TrGC   | $\text{C}_2\text{H}_5\text{OOH} + \text{OH} \rightarrow \text{C}_2\text{H}_5\text{O}_2 + \text{H}_2\text{O}$                                             | $k_{\text{R00HRO}}$                                                                                                                                  | Sander et al. (2019)                              |
| G42007b | TrGC   | $\text{C}_2\text{H}_5\text{OOH} + \text{OH} \rightarrow \text{CH}_3\text{CHO} + \text{OH}$                                                               | $k_{\text{s*f\_sOOH}}$                                                                                                                               | Sander et al. (2019)                              |
| G42008a | TrGC   | $\text{CH}_3\text{CHO} + \text{OH} \rightarrow \text{CH}_3\text{C}(\text{O}) + \text{H}_2\text{O}$                                                       | $4.4\text{E-}12 * \text{EXP}(365./\text{temp}) * 0.95$                                                                                               | Atkinson et al. (2006)                            |
| G42008b | TrGC   | $\text{CH}_3\text{CHO} + \text{OH} \rightarrow \text{HCOCH}_2\text{O}_2 + \text{H}_2\text{O}$                                                            | $4.4\text{E-}12 * \text{EXP}(365./\text{temp}) * 0.05$                                                                                               | Atkinson et al. (2006)                            |
| G42009  | TrGCN  | $\text{CH}_3\text{CHO} + \text{NO}_3 \rightarrow \text{CH}_3\text{C}(\text{O}) + \text{HNO}_3$                                                           | $\text{KN03AL}$                                                                                                                                      | Rickard (2022)                                    |
| G42010  | TrGC   | $\text{CH}_3\text{COOH} + \text{OH} \rightarrow \text{CH}_3 + \text{CO}_2 + \text{H}_2\text{O}$                                                          | $k_{\text{CH3CO2H\_OH}}$                                                                                                                             | Atkinson et al. (2006)*                           |
| G42011a | TrGC   | $\text{CH}_3\text{C}(\text{O})\text{OO} + \text{HO}_2 \rightarrow \text{OH} + \text{CH}_3 + \text{CO}_2$                                                 | $5.20\text{E-}13 * \text{EXP}(980./\text{temp}) * 1.507 * 0.61$                                                                                      | Groß et al. (2014)                                |
| G42011b | TrGC   | $\text{CH}_3\text{C}(\text{O})\text{OO} + \text{HO}_2 \rightarrow \text{CH}_3\text{C}(\text{O})\text{OOH}$                                               | $5.20\text{E-}13 * \text{EXP}(980./\text{temp}) * 1.507 * 0.23$                                                                                      | Groß et al. (2014)                                |

Table 1: Gas phase reactions (... continued)

| #       | labels | reaction                                                                                                                                                     | rate coefficient                                                            | reference                                         |
|---------|--------|--------------------------------------------------------------------------------------------------------------------------------------------------------------|-----------------------------------------------------------------------------|---------------------------------------------------|
| G42011c | TrGC   | $\text{CH}_3\text{C}(\text{O})\text{OO} + \text{HO}_2 \rightarrow \text{CH}_3\text{COOH} + \text{O}_3$                                                       | $5.20\text{E}-13 \cdot \text{EXP}(980./\text{temp}) \cdot 1.507 \cdot 0.16$ | Groß et al. (2014)                                |
| G42012  | TrGCN  | $\text{CH}_3\text{C}(\text{O})\text{OO} + \text{NO} \rightarrow \text{CH}_3 + \text{CO}_2 + \text{NO}_2$                                                     | $8.1\text{E}-12 \cdot \text{EXP}(270./\text{temp})$                         | Tyndall et al. (2001a)                            |
| G42013  | TrGCN  | $\text{CH}_3\text{C}(\text{O})\text{OO} + \text{NO}_2 \rightarrow \text{PAN}$                                                                                | k_CH3C03_N02                                                                | Burkholder et al. (2015)*                         |
| G42014  | TrGCN  | $\text{CH}_3\text{C}(\text{O})\text{OO} + \text{NO}_3 \rightarrow \text{CH}_3 + \text{NO}_2 + \text{CO}_2$                                                   | 4.E-12                                                                      | Canosa-Mas et al. (1996)                          |
| G42017a | TrGC   | $\text{CH}_3\text{C}(\text{O})\text{OO} \rightarrow \text{CH}_3 + \text{CO}_2$                                                                               | k1_R02RC03*0.9                                                              | Sander et al. (2019)                              |
| G42017b | TrGC   | $\text{CH}_3\text{C}(\text{O})\text{OO} \rightarrow \text{CH}_3\text{COOH}$                                                                                  | k1_R02RC03*0.1                                                              | Sander et al. (2019)                              |
| G42018  | TrGC   | $\text{CH}_3\text{C}(\text{O})\text{OOH} + \text{OH} \rightarrow \text{CH}_3\text{C}(\text{O})\text{OO} + \text{H}_2\text{O}$                                | k_R00HRO                                                                    | Rickard (2022)*                                   |
| G42020  | TrGCN  | $\text{PAN} + \text{OH} \rightarrow \text{HCHO} + \text{CO} + \text{NO}_2 + \text{H}_2\text{O}$                                                              | 3.00E-14                                                                    | Rickard (2022)                                    |
| G42021  | TrGCN  | $\text{PAN} \rightarrow \text{CH}_3\text{C}(\text{O})\text{OO} + \text{NO}_2$                                                                                | k_PAN_M                                                                     | Burkholder et al. (2015)*                         |
| G42022a | TrGC   | $\text{C}_2\text{H}_2 + \text{OH} \rightarrow \text{GLYOX} + \text{OH}$                                                                                      | k_3rd(temp, cair, 5.5e-30, 0.0, 8.3e-13, -2., 0.6)*0.71                     | Burkholder et al. (2015)*                         |
| G42022b | TrGC   | $\text{C}_2\text{H}_2 + \text{OH} \rightarrow \text{HCOOH} + \text{CO} + \text{HO}_2$                                                                        | k_3rd(temp, cair, 5.5e-30, 0.0, 8.3e-13, -2., 0.6)*0.29                     | Burkholder et al. (2015)*                         |
| G42023a | TrGC   | $\text{HOCH}_2\text{CHO} + \text{OH} \rightarrow \text{HOCH}_2\text{CO} + \text{H}_2\text{O}$                                                                | 8.00E-12*0.80                                                               | Atkinson et al. (2006)                            |
| G42023b | TrGC   | $\text{HOCH}_2\text{CHO} + \text{OH} \rightarrow \text{HOCHCHO} + \text{H}_2\text{O}$                                                                        | 8.00E-12*0.20                                                               | Atkinson et al. (2006)                            |
| G42024a | TrGC   | $\text{HOCH}_2\text{CO} + \text{O}_2 \rightarrow \text{HOCH}_2\text{CO}_3$                                                                                   | $5.1\text{E}-12 \cdot (1 - 1./((1 + 1.85\text{E}-18 \cdot \text{cair})))$   | Atkinson et al. (2006), Beyersdorf et al. (2010)* |
| G42024b | TrGC   | $\text{HOCH}_2\text{CO} + \text{O}_2 \rightarrow \text{OH} + \text{HCHO} + \text{CO}_2$                                                                      | $5.1\text{E}-12 \cdot 1./((1 + 1.85\text{E}-18 \cdot \text{cair}))$         | Atkinson et al. (2006), Beyersdorf et al. (2010)* |
| G42025  | TrGC   | $\text{HOCHCHO} \rightarrow \text{GLYOX} + \text{HO}_2$                                                                                                      | KDEC                                                                        | Sander et al. (2019)                              |
| G42026  | TrGCN  | $\text{HOCH}_2\text{CHO} + \text{NO}_3 \rightarrow \text{HOCH}_2\text{CO} + \text{HNO}_3$                                                                    | KN03AL                                                                      | Rickard (2022)                                    |
| G42027a | TrGC   | $\text{HOCH}_2\text{CO}_3 \rightarrow \text{HCHO} + \text{CO}_2 + \text{HO}_2$                                                                               | k1_R02RC03*0.9                                                              | Sander et al. (2019)                              |
| G42027b | TrGC   | $\text{HOCH}_2\text{CO}_3 \rightarrow \text{HOCH}_2\text{CO}_2\text{H}$                                                                                      | k1_R02RC03*0.1                                                              | Sander et al. (2019)                              |
| G42028a | TrGC   | $\text{HOCH}_2\text{CO}_3 + \text{HO}_2 \rightarrow \text{HCHO} + \text{HO}_2 + \text{OH} + \text{CO}_2$                                                     | KAPH02*r_C03_OH                                                             | Sander et al. (2019), Groß et al. (2014)          |
| G42028b | TrGC   | $\text{HOCH}_2\text{CO}_3 + \text{HO}_2 \rightarrow \text{HOCH}_2\text{CO}_3\text{H}$                                                                        | KAPH02*r_C03_OOH                                                            | Sander et al. (2019), Groß et al. (2014)          |
| G42028c | TrGC   | $\text{HOCH}_2\text{CO}_3 + \text{HO}_2 \rightarrow \text{HOCH}_2\text{CO}_2\text{H} + \text{O}_3$                                                           | KAPH02*r_C03_O3                                                             | Sander et al. (2019), Groß et al. (2014)          |
| G42029  | TrGCN  | $\text{HOCH}_2\text{CO}_3 + \text{NO} \rightarrow \text{NO}_2 + \text{HO}_2 + \text{HCHO} + \text{CO}_2$                                                     | KAPNO                                                                       | Rickard (2022)                                    |
| G42030  | TrGCN  | $\text{HOCH}_2\text{CO}_3 + \text{NO}_2 \rightarrow \text{PHAN}$                                                                                             | k_CH3C03_N02                                                                | Rickard (2022)                                    |
| G42031  | TrGCN  | $\text{HOCH}_2\text{CO}_3 + \text{NO}_3 \rightarrow \text{NO}_2 + \text{HO}_2 + \text{HCHO} + \text{CO}_2$                                                   | KR02N03*1.74                                                                | Rickard (2022)                                    |
| G42032  | TrGC   | $\text{HOCH}_2\text{CO}_2\text{H} + \text{OH} \rightarrow .09 \text{HCHO} + .09 \text{CO}_2 + .91 \text{HCOCO}_2\text{H} + \text{HO}_2 + \text{H}_2\text{O}$ | k_C02H+k_s*f_sOH*f_C02H                                                     | Sander et al. (2019)                              |
| G42033a | TrGC   | $\text{HOCH}_2\text{CO}_3\text{H} + \text{OH} \rightarrow \text{HOCH}_2\text{CO}_3 + \text{H}_2\text{O}$                                                     | k_R00HRO                                                                    | Sander et al. (2019)                              |

Table 1: Gas phase reactions (... continued)

| #       | labels | reaction                                                                                                                                           | rate coefficient                                                                            | reference                                                                  |
|---------|--------|----------------------------------------------------------------------------------------------------------------------------------------------------|---------------------------------------------------------------------------------------------|----------------------------------------------------------------------------|
| G42033b | TrGC   | $\text{HOCH}_2\text{CO}_3\text{H} + \text{OH} \rightarrow \text{HCOCO}_3\text{H} + \text{HO}_2$                                                    | $k_{\text{s*f\_sOH*f\_CO2H}}$                                                               | Sander et al. (2019)                                                       |
| G42034  | TrGCN  | $\text{PHAN} \rightarrow \text{HOCH}_2\text{CO}_3 + \text{NO}_2$                                                                                   | $k_{\text{PAN\_M}}$                                                                         | Rickard (2022)                                                             |
| G42035  | TrGCN  | $\text{PHAN} + \text{OH} \rightarrow \text{HCHO} + \text{CO} + \text{NO}_2 + \text{H}_2\text{O}$                                                   | $k_{\text{s*f\_sOH*f\_cpan+k\_ROHRO}}$                                                      | Sander et al. (2019)                                                       |
| G42036  | TrGC   | $\text{GLYOX} + \text{OH} \rightarrow \text{HCOCO} + \text{H}_2\text{O}$                                                                           | $3.1\text{E-}12*\text{EXP}(340./\text{temp})$                                               | Atkinson et al. (2006), Orlando and Tyndall (2001), Lockhart et al. (2013) |
| G42037  | TrGCN  | $\text{GLYOX} + \text{NO}_3 \rightarrow \text{HCOCO} + \text{HNO}_3$                                                                               | KN03AL                                                                                      | Rickard (2022)                                                             |
| G42038a | TrGC   | $\text{HCOCO} \rightarrow \text{CO} + \text{CO} + \text{HO}_2$                                                                                     | $7.\text{E}11*\text{EXP}(-3160./\text{temp})$<br>$+5.\text{E-}12*c(\text{ind\_02})$         | Orlando and Tyndall (2001), Lockhart et al. (2013), Rickard (2022)         |
| G42037b | TrGC   | $\text{HCOCO} \rightarrow \text{HCOCO}_3$                                                                                                          | $5.\text{E-}12*c(\text{ind\_02})*3.2*\text{exp}(-550./\text{temp})$                         | Lockhart et al. (2013), Rickard (2022)                                     |
| G42037c | TrGC   | $\text{HCOCO} \rightarrow \text{OH} + \text{CO} + \text{CO}_2$                                                                                     | $5.\text{E-}12*c(\text{ind\_02})$<br>$*(1.-3.2*\text{exp}(-550./\text{temp}))$              | Lockhart et al. (2013), Rickard (2022)                                     |
| G42039a | TrGC   | $\text{HCOCO}_3 \rightarrow \text{CO} + \text{HO}_2 + \text{CO}_2$                                                                                 | $k1_{\text{R02RC03}*0.9}$                                                                   | Sander et al. (2019)                                                       |
| G42039b | TrGC   | $\text{HCOCO}_3 \rightarrow \text{HCOCO}_2\text{H}$                                                                                                | $k1_{\text{R02RC03}*0.1}$                                                                   | Sander et al. (2019)                                                       |
| G42040  | TrGC   | $\text{HCOCO}_3 + \text{HO}_2 \rightarrow \text{HO}_2 + \text{CO} + \text{CO}_2 + \text{OH}$                                                       | KAPH02                                                                                      | Feierabend et al. (2008), Sander et al. (2019)                             |
| G42041  | TrGCN  | $\text{HCOCO}_3 + \text{NO} \rightarrow \text{HO}_2 + \text{CO} + \text{NO}_2 + \text{CO}_2$                                                       | KAPNO                                                                                       | Rickard (2022)                                                             |
| G42042  | TrGCN  | $\text{HCOCO}_3 + \text{NO}_3 \rightarrow \text{HO}_2 + \text{CO} + \text{NO}_2 + \text{CO}_2$                                                     | $\text{KR02NO3}*1.74$                                                                       | Rickard (2022)                                                             |
| G42043  | TrGCN  | $\text{HCOCO}_3 + \text{NO}_2 \rightarrow \text{HO}_2 + \text{CO} + \text{NO}_3 + \text{CO}_2$                                                     | $k_{\text{CH3CO3\_NO2}}$                                                                    | Orlando and Tyndall (2001), Sander et al. (2019)                           |
| G42044  | TrGC   | $\text{HCOCO}_2\text{H} + \text{OH} \rightarrow \text{CO} + \text{HO}_2 + \text{CO}_2 + \text{H}_2\text{O}$                                        | $k_{\text{CO2H+k\_t*f\_0*f\_CO2H}}$                                                         | Sander et al. (2019)                                                       |
| G42045a | TrGC   | $\text{HCOCO}_3\text{H} + \text{OH} \rightarrow \text{HCOCO}_3 + \text{H}_2\text{O}$                                                               | $k_{\text{ROOHR0}}$                                                                         | Sander et al. (2019)                                                       |
| G42045b | TrGC   | $\text{HCOCO}_3\text{H} + \text{OH} \rightarrow \text{CO} + \text{CO}_2 + \text{H}_2\text{O} + \text{OH}$                                          | $k_{\text{t*f\_0*f\_CO2H}}$                                                                 | Sander et al. (2019)                                                       |
| G42046  | TrGC   | $\text{HOCH}_2\text{CH}_2\text{O}_2 \rightarrow .6 \text{HOCH}_2\text{CH}_2\text{O} + .2 \text{HOCH}_2\text{CHO} + .2 \text{ETHGLY}$               | $2.*(7.8\text{E-}14*\text{EXP}(1000./\text{temp})$<br>$*k_{\text{CH302}})**(.5)*\text{R02}$ | Atkinson et al. (2006), Rickard (2022)                                     |
| G42047  | TrGCN  | $\text{HOCH}_2\text{CH}_2\text{O}_2 + \text{NO} \rightarrow .25 \text{HO}_2 + .5 \text{HCHO} + .75 \text{HOCH}_2\text{CH}_2\text{O} + \text{NO}_2$ | $\text{KR02NO}*(1.-\alpha_{\text{AN}}(3,1,0,0,0, \text{temp}, \text{cair}))$                | Rickard (2022)*                                                            |
| G42048  | TrGCN  | $\text{HOCH}_2\text{CH}_2\text{O}_2 + \text{NO} \rightarrow \text{ETHOHNO}_3$                                                                      | $\text{KR02NO}*\alpha_{\text{AN}}(3,1,0,0,0, \text{temp}, \text{cair})$                     | Sander et al. (2019)                                                       |
| G42049a | TrGC   | $\text{HOCH}_2\text{CH}_2\text{O}_2 + \text{HO}_2 \rightarrow \text{HYETHO}_2\text{H}$                                                             | $1.53\text{E-}13*\text{EXP}(1300./\text{temp})$<br>$*(1.-r_{\text{CHOHCH202\_OH}})$         | Rickard (2022)                                                             |
| G42049b | TrGC   | $\text{HOCH}_2\text{CH}_2\text{O}_2 + \text{HO}_2 \rightarrow \text{HOCH}_2\text{CH}_2\text{O} + \text{OH}$                                        | $1.53\text{E-}13*\text{EXP}(1300./\text{temp})$<br>$*r_{\text{CHOHCH202\_OH}}$              | Rickard (2022)                                                             |



Table 1: Gas phase reactions (... continued)

| #       | labels | reaction                                                                                                                                                       | rate coefficient                              | reference                                  |
|---------|--------|----------------------------------------------------------------------------------------------------------------------------------------------------------------|-----------------------------------------------|--------------------------------------------|
| G42050  | TrGCN  | ETHOHNO <sub>3</sub> + OH → .93 NO <sub>3</sub> CH <sub>2</sub> CHO + .93 HO <sub>2</sub> + .07 HOCH <sub>2</sub> CHO + .07 NO <sub>2</sub> + H <sub>2</sub> O | k_s*(f_sOH*f_CH2ON02+f_ON02*f_pCH2OH)+k_ROHRO | Sander et al. (2019)                       |
| G42051a | TrGC   | HYETHO <sub>2</sub> H + OH → HOCH <sub>2</sub> CH <sub>2</sub> O <sub>2</sub> + H <sub>2</sub> O                                                               | k_ROOHR0                                      | Rickard (2022)*                            |
| G42051b | TrGC   | HYETHO <sub>2</sub> H + OH → HOCH <sub>2</sub> CHO + OH + H <sub>2</sub> O                                                                                     | k_s*f_s00H*f_pCH2OH                           | Sander et al. (2019)                       |
| G42051c | TrGC   | HYETHO <sub>2</sub> H + OH → HOOCH <sub>2</sub> CHO + HO <sub>2</sub> + H <sub>2</sub> O                                                                       | k_s*f_sOH*f_pCH2OH+k_ROHRO                    | Sander et al. (2019)                       |
| G42052a | TrGC   | HOCH <sub>2</sub> CH <sub>2</sub> O → HO <sub>2</sub> + HOCH <sub>2</sub> CHO                                                                                  | 6.00E-14*EXP(-550./temp)<br>*C(ind_02)        | Rickard (2022)                             |
| G42052b | TrGC   | HOCH <sub>2</sub> CH <sub>2</sub> O → HO <sub>2</sub> + HCHO + HCHO                                                                                            | 9.50E13*EXP(-5988./temp)                      | Rickard (2022)                             |
| G42053  | TrGC   | ETHGLY + OH → HOCH <sub>2</sub> CHO + HO <sub>2</sub> + H <sub>2</sub> O                                                                                       | 2.*k_s*f_sOH*f_pCH2OH+2.*k_ROHRO              | Sander et al. (2019)                       |
| G42054  | TrGC   | HCOCH <sub>2</sub> O <sub>2</sub> → .6 HCHO + .6 CO + .6 HO <sub>2</sub> + .2 GLYOX + .2 HOCH <sub>2</sub> CHO                                                 | k1_R02p0R02                                   | Sander et al. (2019)                       |
| G42055a | TrGC   | HCOCH <sub>2</sub> O <sub>2</sub> + HO <sub>2</sub> → HOOCH <sub>2</sub> CHO                                                                                   | k_R02_H02(temp,2)*r_COCH202_00H               | Sander et al. (2019)                       |
| G42055b | TrGC   | HCOCH <sub>2</sub> O <sub>2</sub> + HO <sub>2</sub> → HCHO + CO + HO <sub>2</sub> + OH                                                                         | k_R02_H02(temp,2)*r_COCH202_0H                | Sander et al. (2019)                       |
| G42056a | TrGCN  | HCOCH <sub>2</sub> O <sub>2</sub> + NO → NO <sub>2</sub> + HCHO + CO + HO <sub>2</sub>                                                                         | KR02N0*(1.-alpha_AN(3,1,1,0,0, temp, cair))   | Sander et al. (2019)                       |
| G42056b | TrGCN  | HCOCH <sub>2</sub> O <sub>2</sub> + NO → NO <sub>3</sub> CH <sub>2</sub> CHO                                                                                   | KR02N0*alpha_AN(3,1,1,0,0,temp, cair)         | Sander et al. (2019)                       |
| G42057  | TrGCN  | HCOCH <sub>2</sub> O <sub>2</sub> + NO <sub>3</sub> → HCHO + CO + HO <sub>2</sub> + NO <sub>2</sub>                                                            | KR02N03                                       | Sander et al. (2019)                       |
| G42058a | TrGC   | HOOCH <sub>2</sub> CHO + OH → HCOCH <sub>2</sub> O <sub>2</sub>                                                                                                | k_ROOHR0                                      | Sander et al. (2019)                       |
| G42058b | TrGC   | HOOCH <sub>2</sub> CHO + OH → HCHO + CO + OH                                                                                                                   | 0.8*8.E-12                                    | Sander et al. (2019)*                      |
| G42058c | TrGC   | HOOCH <sub>2</sub> CHO + OH → GLYOX + OH                                                                                                                       | k_s*f_s00H*f_CHO                              | Sander et al. (2019)                       |
| G42059  | TrGCN  | HOOCH <sub>2</sub> CHO + NO <sub>3</sub> → OH + HCHO + CO + HNO <sub>3</sub>                                                                                   | KN03AL                                        | Rickard (2022)                             |
| G42060  | TrGCN  | HOOCH <sub>2</sub> CO <sub>3</sub> + NO → NO <sub>2</sub> + OH + HCHO + CO <sub>2</sub>                                                                        | KAPN0                                         | Sander et al. (2019)                       |
| G42061  | TrGCN  | HOOCH <sub>2</sub> CO <sub>3</sub> + NO <sub>3</sub> → NO <sub>2</sub> + OH + HCHO + CO <sub>2</sub>                                                           | KR02N03*1.74                                  | Sander et al. (2019)                       |
| G42062a | TrGC   | HOOCH <sub>2</sub> CO <sub>3</sub> + HO <sub>2</sub> → 2 OH + HCHO + CO <sub>2</sub>                                                                           | KAPH02*r_C03_0H                               | Sander et al. (2019)                       |
| G42062b | TrGC   | HOOCH <sub>2</sub> CO <sub>3</sub> + HO <sub>2</sub> → HOOCH <sub>2</sub> CO <sub>3</sub> H                                                                    | KAPH02*r_C03_00H                              | Sander et al. (2019)                       |
| G42062c | TrGC   | HOOCH <sub>2</sub> CO <sub>3</sub> + HO <sub>2</sub> → HOOCH <sub>2</sub> CO <sub>2</sub> H + O <sub>3</sub>                                                   | KAPH02*r_C03_03                               | Sander et al. (2019)                       |
| G42063a | TrGC   | HOOCH <sub>2</sub> CO <sub>3</sub> → OH + HCHO + CO <sub>2</sub>                                                                                               | k1_R02RC03*0.9                                | Sander et al. (2019)                       |
| G42063b | TrGC   | HOOCH <sub>2</sub> CO <sub>3</sub> → HOOCH <sub>2</sub> CO <sub>2</sub> H                                                                                      | k1_R02RC03*0.1                                | Sander et al. (2019)                       |
| G42064a | TrGC   | HOOCH <sub>2</sub> CO <sub>3</sub> H + OH → HOOCH <sub>2</sub> CO <sub>3</sub> + H <sub>2</sub> O                                                              | 2.*k_ROOHR0                                   | Sander et al. (2019)                       |
| G42064b | TrGC   | HOOCH <sub>2</sub> CO <sub>3</sub> H + OH → HCOCO <sub>3</sub> H + OH + H <sub>2</sub> O                                                                       | k_s*f_s00H*f_C02H                             | Sander et al. (2019)                       |
| G42065  | TrGC   | HOOCH <sub>2</sub> CO <sub>2</sub> H + OH → HCOCO <sub>2</sub> H + OH + H <sub>2</sub> O                                                                       | k_s*f_s00H*f_C02H+k_C02H                      | Sander et al. (2019)                       |
| G42066  | TrGC   | CH <sub>2</sub> CO + OH → .6 HCHO + .6 HO <sub>2</sub> + .6 CO + .4 HOOCH <sub>2</sub> CO <sub>2</sub> H                                                       | 2.8E-12*exp(510./temp)                        | Baulch et al. (2005), Sander et al. (2019) |
| G42067a | TrGC   | CH <sub>3</sub> CHOHOOH + OH → CH <sub>3</sub> COOH + OH                                                                                                       | (k_t*f_t00H*f_t0H + k_ROHRO)                  | Sander et al. (2019)                       |

Table 1: Gas phase reactions (... continued)

| #       | labels  | reaction                                                                                                                                                                      | rate coefficient                                                                                                                            | reference                                         |
|---------|---------|-------------------------------------------------------------------------------------------------------------------------------------------------------------------------------|---------------------------------------------------------------------------------------------------------------------------------------------|---------------------------------------------------|
| G42067b | TrGC    | $\text{CH}_3\text{CHOHOOH} + \text{OH} \rightarrow \text{CH}_3\text{CHOHO}_2$                                                                                                 | k_R00HR0                                                                                                                                    | Sander et al. (2019)                              |
| G42068  | TrGC    | $\text{CH}_3\text{CHOHO}_2 \rightarrow \text{CH}_3\text{CHO} + \text{HO}_2$                                                                                                   | $3.46\text{E}12 \cdot \text{EXP}(-12500./ (1.98 \cdot \text{temp}))$                                                                        | Hermans et al. (2005), Sander et al. (2019)       |
| G42069  | TrGC    | $\text{CH}_3\text{CHO} + \text{HO}_2 \rightarrow \text{CH}_3\text{CHOHO}_2$                                                                                                   | $3.46\text{E}12 \cdot \text{EXP}(-12500./ (1.98 \cdot \text{temp})) / (6.34\text{E}26 \cdot \text{EXP}(-14700./ (1.98 \cdot \text{temp})))$ | Hermans et al. (2005), Sander et al. (2019)       |
| G42070  | TrGC    | $\text{CH}_3\text{CHOHO}_2 + \text{HO}_2 \rightarrow .5 \text{ CH}_3\text{CHOHOOH} + .3 \text{ CH}_3\text{COOH} + .2 \text{ CH}_3 + .2 \text{ HCOOH} + .2 \text{ OH}$         | $5.6\text{E}-15 \cdot \text{EXP}(2300./ \text{temp})$                                                                                       | Sander et al. (2019)                              |
| G42071  | TrGC    | $\text{CH}_3\text{CHOHO}_2 \rightarrow \text{CH}_3 + \text{HCOOH} + \text{OH}$                                                                                                | k1_R02s0R02                                                                                                                                 | Sander et al. (2019)                              |
| G42072  | TrGCN   | $\text{CH}_3\text{CHOHO}_2 + \text{NO} \rightarrow \text{CH}_3 + \text{HCOOH} + \text{OH} + \text{NO}_2$                                                                      | KR02NO                                                                                                                                      | Sander et al. (2019)                              |
| G42073  | TrGCN   | $\text{C}_2\text{H}_5\text{ONO}_2 + \text{OH} \rightarrow \text{CH}_3\text{CHO} + \text{H}_2\text{O} + \text{NO}_2$                                                           | $6.7\text{E}-13 \cdot \text{EXP}(-395./ \text{temp})$                                                                                       | Atkinson et al. (2006)                            |
| G42074a | TrGCN   | $\text{NO}_3\text{CH}_2\text{CHO} + \text{OH} \rightarrow \text{GLYOX} + \text{NO}_2 + \text{H}_2\text{O}$                                                                    | k_s*f_CH20NO2*f_CHO                                                                                                                         | Paulot et al. (2009a), Sander et al. (2019)*      |
| G42074b | TrGCN   | $\text{NO}_3\text{CH}_2\text{CHO} + \text{OH} \rightarrow \text{NO}_3\text{CH}_2\text{CO}_3 + \text{H}_2\text{O}$                                                             | k_t*f_0*f_CH20NO2*3.                                                                                                                        | Paulot et al. (2009a), Sander et al. (2019)*      |
| G42075  | TrGCN   | $\text{NO}_3\text{CH}_2\text{CO}_3 + \text{HO}_2 \rightarrow \text{HCHO} + \text{NO}_2 + \text{CO}_2 + \text{OH}$                                                             | KAPH02                                                                                                                                      | Rickard (2022)*                                   |
| G42076  | TrGCN   | $\text{NO}_3\text{CH}_2\text{CO}_3 + \text{NO} \rightarrow \text{HCHO} + \text{NO}_2 + \text{CO}_2 + \text{NO}_2$                                                             | KAPNO                                                                                                                                       | Rickard (2022)                                    |
| G42077  | TrGCN   | $\text{NO}_3\text{CH}_2\text{CO}_3 + \text{NO}_2 \rightarrow \text{NO}_3\text{CH}_2\text{CHO}$                                                                                | k_CH3C03_N02                                                                                                                                | Rickard (2022)                                    |
| G42078  | TrGCN   | $\text{NO}_3\text{CH}_2\text{CO}_3 \rightarrow \text{HCHO} + \text{NO}_2 + \text{CO}_2$                                                                                       | k1_R02RC03                                                                                                                                  | Rickard (2022)*                                   |
| G42079  | TrGCN   | $\text{NO}_3\text{CH}_2\text{CHO} \rightarrow \text{NO}_3\text{CH}_2\text{CO}_3 + \text{NO}_2$                                                                                | k_PAN_M                                                                                                                                     | Rickard (2022)                                    |
| G42080  | StTrGCN | $\text{C}_2\text{H}_5\text{O}_2 + \text{NO}_2 \rightarrow \text{C}_2\text{H}_5\text{O}_2\text{NO}_2$                                                                          | k_3rd_iupac(temp, cair, 1.3E-29, 6.2, 8.8E-12, 0.0, 0.31)                                                                                   | Atkinson et al. (2006)                            |
| G42081  | StTrGCN | $\text{C}_2\text{H}_5\text{O}_2\text{NO}_2 \rightarrow \text{C}_2\text{H}_5\text{O}_2 + \text{NO}_2$                                                                          | k_3rd_iupac(temp, cair, REAL(4.8E-4*EXP(-9285./temp), SP), 0.0, REAL(8.8E15*EXP(-10440./temp), SP), 0.0, 0.31)                              | Atkinson et al. (2006)                            |
| G42082  | StTrGCN | $\text{C}_2\text{H}_5\text{O}_2\text{NO}_2 + \text{OH} \rightarrow \text{CH}_3\text{CHO} + \text{NO}_3 + \text{H}_2\text{O}$                                                  | $9.50\text{E}-13 \cdot \text{EXP}(-650./ \text{temp})$                                                                                      | Sander et al. (2019)*                             |
| G42083a | TrGC    | $\text{CH}_3\text{C}(\text{O}) + \text{O}_2 \rightarrow \text{CH}_3\text{C}(\text{O})\text{OO}$                                                                               | $5.1\text{E}-12 \cdot (1. - 1./ (1. + 9.4\text{E}-18 \cdot \text{cair}))$                                                                   | Atkinson et al. (2006), Beyersdorf et al. (2010)* |
| G42083b | TrGC    | $\text{CH}_3\text{C}(\text{O}) + \text{O}_2 \rightarrow \text{OH} + \text{HCHO} + \text{CO}$                                                                                  | $5.1\text{E}-12 \cdot 1./ (1. + 9.4\text{E}-18 \cdot \text{cair})$                                                                          | Atkinson et al. (2006), Beyersdorf et al. (2010)* |
| G42084  | TrGC    | $\text{C}_2\text{H}_5\text{OH} + \text{OH} \rightarrow .95 \text{ C}_2\text{H}_5\text{O}_2 + .95 \text{ HO}_2 + .05 \text{ HOCH}_2\text{CH}_2\text{O}_2 + \text{H}_2\text{O}$ | $3.0\text{E}-12 \cdot \text{EXP}(20./ \text{temp})$                                                                                         | Sander et al. (2019), Atkinson et al. (2006)      |
| G42085a | TrGCN   | $\text{CH}_3\text{CN} + \text{OH} \rightarrow \text{NCCH}_2\text{O}_2 + \text{H}_2\text{O}$                                                                                   | $8.1\text{E}-13 \cdot \text{EXP}(-1080./ \text{temp}) \cdot 0.40$                                                                           | Atkinson et al. (2006), Tyndall et al. (2001b)*   |

Table 1: Gas phase reactions (... continued)

| #       | labels | reaction                                                                                                                             | rate coefficient                                                                                                     | reference                                       |
|---------|--------|--------------------------------------------------------------------------------------------------------------------------------------|----------------------------------------------------------------------------------------------------------------------|-------------------------------------------------|
| G42085b | TrGCN  | $\text{CH}_3\text{CN} + \text{OH} \rightarrow \text{OH} + \text{CH}_3\text{C}(\text{O}) + \text{NO}$                                 | $8.1\text{E}-13 \cdot \text{EXP}(-1080./\text{temp}) \cdot (1.-0.40)$                                                | Atkinson et al. (2006), Tyndall et al. (2001b)* |
| G42086a | TrGCN  | $\text{CH}_3\text{CN} + \text{O}(^1\text{D}) \rightarrow \text{O}(^3\text{P}) + \text{CH}_3\text{CN}$                                | $2.54\text{E}-10 \cdot \text{EXP}(-24./\text{temp}) \cdot 0.0269 \cdot \text{EXP}(137./\text{temp})$                 | Strekowski et al. (2010)                        |
| G42086b | TrGCN  | $\text{CH}_3\text{CN} + \text{O}(^1\text{D}) \rightarrow 2 \text{H} + \text{CO} + \text{HCN}$                                        | $2.54\text{E}-10 \cdot \text{EXP}(-24./\text{temp}) \cdot 0.16$                                                      | Strekowski et al. (2010)*                       |
| G42086c | TrGCN  | $\text{CH}_3\text{CN} + \text{O}(^1\text{D}) \rightarrow .5 \text{CH}_3 + .5 \text{NCO} + .5 \text{NCCH}_2\text{O}_2 + .5 \text{OH}$ | $2.54\text{E}-10 \cdot \text{EXP}(-24./\text{temp}) \cdot (1. - (0.16 + 0.0269 \cdot \text{EXP}(137./\text{temp})))$ | Strekowski et al. (2010)*                       |
| G42087  | TrGCN  | $\text{NCCH}_2\text{O}_2 + \text{NO} \rightarrow \text{HCN} + \text{CO}_2 + \text{HO}_2 + \text{NO}_2$                               | KR02N0                                                                                                               | see note*                                       |
| G42088  | TrGCN  | $\text{NCCH}_2\text{O}_2 + \text{HO}_2 \rightarrow \text{HCN} + \text{CO}_2 + \text{HO}_2$                                           | k_R02_H02(temp, 2)                                                                                                   | see note*                                       |
| G42089a | TrGC   | $\text{CH}_2\text{CHOH} + \text{OH} \rightarrow \text{HCOOH} + \text{OH} + \text{HCHO}$                                              | k_CH2CHOH_OH_HCOOH                                                                                                   | Sander et al. (2019), So et al. (2014)*         |
| G42089b | TrGC   | $\text{CH}_2\text{CHOH} + \text{OH} \rightarrow \text{HOCH}_2\text{CHO} + \text{HO}_2$                                               | k_CH2CHOH_OH_ALD                                                                                                     | Sander et al. (2019), So et al. (2014)          |
| G42090  | TrGC   | $\text{CH}_2\text{CHOH} + \text{HCOOH} \rightarrow \text{CH}_3\text{CHO} + \text{HCOOH}$                                             | k_CH2CHOH_HCOOH                                                                                                      | Sander et al. (2019), da Silva (2010)*          |
| G42091  | TrGC   | $\text{CH}_3\text{CHO} + \text{HCOOH} \rightarrow \text{CH}_2\text{CHOH} + \text{HCOOH}$                                             | k_ALD_HCOOH                                                                                                          | Sander et al. (2019), da Silva (2010)*          |
| G42092  | TrGC   | $\text{HOCCOOH} + \text{OH} \rightarrow 2 \text{CO}_2 + \text{HO}_2 + \text{H}_2\text{O}$                                            | 2.0 *k_co2h                                                                                                          | see note*                                       |
| G42093a | TrGC   | $\text{HOCH}_2\text{CHOH} + \text{OH} \rightarrow \text{HOCH}_2\text{CO}_2\text{H} + \text{HO}_2 + \text{H}_2\text{O}$               | k_t*f_toh*f_toh                                                                                                      | see note*                                       |
| G42093b | TrGC   | $\text{HOCH}_2\text{CHOH} + \text{OH} \rightarrow \text{CHOCHOH} + \text{HO}_2 + \text{H}_2\text{O}$                                 | k_s*f_soh*f_pch2oh                                                                                                   | see note*                                       |
| G42093c | TrGC   | $\text{HOCH}_2\text{CHOH} + \text{OH} \rightarrow \text{HCOOH} + \text{HOCH}_2\text{O}_2 + \text{H}_2\text{O}$                       | 2.0 * k_rohro                                                                                                        | see note*                                       |
| G42093d | TrGC   | $\text{HOCH}_2\text{CHOH} + \text{OH} \rightarrow \text{HCHO} + \text{HCOOH} + \text{HO}_2 + \text{H}_2\text{O}$                     | k_rohro                                                                                                              | see note*                                       |
| G42094a | TrGC   | $\text{CH}_3\text{CHOH} + \text{OH} \rightarrow \text{CH}_3\text{COOH} + \text{HO}_2 + \text{H}_2\text{O}$                           | k_t*f_toh*f_toh                                                                                                      | see note*                                       |
| G42094b | TrGC   | $\text{CH}_3\text{CHOH} + \text{OH} \rightarrow \text{CH}_3 + \text{HCOOH} + \text{H}_2\text{O}$                                     | 2.0 * k_rohro                                                                                                        | see note*                                       |
| G42095a | TrGC   | $\text{CHOH} + \text{OH} \rightarrow \text{HOCCOOH} + \text{HO}_2 + \text{H}_2\text{O}$                                              | k_t*f_toh*f_toh*f_co2h                                                                                               | see note*                                       |
| G42095b | TrGC   | $\text{CHOH} + \text{OH} \rightarrow \text{HCOOH} + \text{CO}_2 + \text{HO}_2 + \text{H}_2\text{O}$                                  | 2.0 * k_rohro + k_co2h                                                                                               | see note*                                       |
| G42096a | TrGC   | $\text{CHOH} + \text{OH} \rightarrow 2 \text{HCOOH} + \text{HO}_2 + \text{H}_2\text{O}$                                              | 4.0 * k_rohro                                                                                                        | see note*                                       |
| G42096b | TrGC   | $\text{CHOH} + \text{OH} \rightarrow \text{CHOH} + \text{HCOOH} + \text{HO}_2 + \text{H}_2\text{O}$                                  | 2.0 * k_t*f_toh*f_toh*f_pch2oh                                                                                       | see note*                                       |
| G42097a | TrGC   | $\text{CHOH} + \text{OH} \rightarrow \text{HCOOH} + \text{CO} + \text{HO}_2 + \text{H}_2\text{O}$                                    | 2.0 * k_rohro + k_t*f_o*f_pch2oh                                                                                     | see note*                                       |
| G42097b | TrGC   | $\text{CHOH} + \text{OH} \rightarrow \text{HCOCO}_2\text{H} + \text{HO}_2 + \text{H}_2\text{O}$                                      | k_t*f_toh*f_toh*f_cho                                                                                                | see note*                                       |
| G42098a | TrGC   | $\text{HOOCH}_2\text{CHOH} + \text{OH} \rightarrow \text{HOOCH}_2\text{CO}_2\text{H} + \text{HO}_2 + \text{H}_2\text{O}$             | k_t*f_toh*f_toh*f_pch2oh                                                                                             | see note*                                       |

Table 1: Gas phase reactions (... continued)

| #       | labels | reaction                                                                                                                                                                                                                                           | rate coefficient                                                                                               | reference                                    |
|---------|--------|----------------------------------------------------------------------------------------------------------------------------------------------------------------------------------------------------------------------------------------------------|----------------------------------------------------------------------------------------------------------------|----------------------------------------------|
| G42098b | TrGC   | $\text{HOOCH}_2\text{CHOHOH} + \text{OH} \rightarrow \text{HCOOH} + \text{HCHO} + \text{OH} + \text{H}_2\text{O}$                                                                                                                                  | $2.0 * k_{\text{rohro}}$                                                                                       | see note*                                    |
| G42098c | TrGC   | $\text{HOOCH}_2\text{CHOHOH} + \text{OH} \rightarrow \text{CHOCHOHOH} + \text{OH} + \text{H}_2\text{O}$                                                                                                                                            | $k_{\text{s*f\_pch2oh*f\_sooh}}$                                                                               | see note*                                    |
| G43000a | TrGC   | $\text{C}_3\text{H}_8 + \text{OH} \rightarrow \text{iC}_3\text{H}_7\text{O}_2 + \text{H}_2\text{O}$                                                                                                                                                | $k_{\text{s}}$                                                                                                 | Sander et al. (2019)                         |
| G43000b | TrGC   | $\text{C}_3\text{H}_8 + \text{OH} \rightarrow \text{C}_3\text{H}_7\text{O}_2 + \text{H}_2\text{O}$                                                                                                                                                 | $2.*k_{\text{p}}$                                                                                              | Sander et al. (2019)                         |
| G43001a | TrGC   | $\text{C}_3\text{H}_6 + \text{O}_3 \rightarrow \text{HCHO} + .16 \text{CH}_3\text{CHOHOOH} + .50 \text{OH} + .50 \text{HCOCH}_2\text{O}_2 + .05 \text{CH}_2\text{CO} + .09 \text{CH}_3\text{OH} + .09 \text{CO} + .2 \text{CH}_4 + .2 \text{CO}_2$ | $5.5\text{E}-15*\text{EXP}(-1880./\text{temp})*.57$                                                            | Atkinson et al. (2006)*                      |
| G43001b | TrGC   | $\text{C}_3\text{H}_6 + \text{O}_3 \rightarrow \text{CH}_3\text{CHO} + \text{CH}_2\text{OO}^*$                                                                                                                                                     | $5.5\text{E}-15*\text{EXP}(-1880./\text{temp})*.43$                                                            | Atkinson et al. (2006)*                      |
| G43002  | TrGC   | $\text{C}_3\text{H}_6 + \text{OH} \rightarrow \text{HYPROPO}_2$                                                                                                                                                                                    | $k_{\text{3rd\_iupac}}(\text{temp}, \text{cair}, 8.6\text{E}-27, 3.5, 3.\text{E}-11, 1., 0.5)$                 | Atkinson et al. (2006), Rickard (2022)       |
| G43003  | TrGCN  | $\text{C}_3\text{H}_6 + \text{NO}_3 \rightarrow \text{PRONO}_3\text{BO}_2$                                                                                                                                                                         | $4.6\text{E}-13*\text{EXP}(-1155./\text{temp})$                                                                | Wallington et al. (2018)                     |
| G43004  | TrGC   | $\text{iC}_3\text{H}_7\text{O}_2 + \text{HO}_2 \rightarrow \text{iC}_3\text{H}_7\text{OOH}$                                                                                                                                                        | $1.9\text{E}-13*\text{EXP}(1300./\text{temp})$                                                                 | Atkinson (1997)*                             |
| G43005a | TrGCN  | $\text{iC}_3\text{H}_7\text{O}_2 + \text{NO} \rightarrow \text{CH}_3\text{COCH}_3 + \text{HO}_2 + \text{NO}_2$                                                                                                                                     | $2.7\text{E}-12*\text{EXP}(360./\text{temp})*(1.-\alpha_{\text{AN}}(3, 2, 0, 0, 0, \text{temp}, \text{cair}))$ | Wallington et al. (2018)                     |
| G43005b | TrGCN  | $\text{iC}_3\text{H}_7\text{O}_2 + \text{NO} \rightarrow \text{iC}_3\text{H}_7\text{ONO}_2$                                                                                                                                                        | $2.7\text{E}-12*\text{EXP}(360./\text{temp})*\alpha_{\text{AN}}(3, 2, 0, 0, 0, \text{temp}, \text{cair})$      | Wallington et al. (2018)                     |
| G43006  | TrGC   | $\text{iC}_3\text{H}_7\text{O}_2 \rightarrow .8 \text{CH}_3\text{COCH}_3 + .2 \text{IPROPOL} + .6 \text{HO}_2$                                                                                                                                     | $2.*(1.6\text{E}-12*\text{EXP}(-2200./\text{temp})*k_{\text{CH302}})**(.5)*\text{R02}$                         | Rickard (2022), Atkinson et al. (2006)       |
| G43007a | TrGC   | $\text{iC}_3\text{H}_7\text{OOH} + \text{OH} \rightarrow \text{iC}_3\text{H}_7\text{O}_2 + \text{H}_2\text{O}$                                                                                                                                     | $k_{\text{R00HRO}}$                                                                                            | Sander et al. (2019)                         |
| G43007b | TrGC   | $\text{iC}_3\text{H}_7\text{OOH} + \text{OH} \rightarrow \text{CH}_3\text{COCH}_3 + \text{H}_2\text{O} + \text{OH}$                                                                                                                                | $k_{\text{t*f\_t00H}}$                                                                                         | Sander et al. (2019)                         |
| G43008  | TrGC   | $\text{C}_3\text{H}_7\text{O}_2 + \text{HO}_2 \rightarrow \text{C}_3\text{H}_7\text{OOH}$                                                                                                                                                          | $1.9\text{E}-13*\text{EXP}(1300./\text{temp})$                                                                 | Atkinson (1997)*                             |
| G43009a | TrGCN  | $\text{C}_3\text{H}_7\text{O}_2 + \text{NO} \rightarrow \text{C}_2\text{H}_5\text{CHO} + \text{HO}_2 + \text{NO}_2$                                                                                                                                | $2.7\text{E}-12*\text{EXP}(360./\text{temp})*(1.-\alpha_{\text{AN}}(3, 1, 0, 0, 0, \text{temp}, \text{cair}))$ | Wallington et al. (2018)                     |
| G43009b | TrGCN  | $\text{C}_3\text{H}_7\text{O}_2 + \text{NO} \rightarrow \text{C}_3\text{H}_7\text{ONO}_2$                                                                                                                                                          | $2.7\text{E}-12*\text{EXP}(360./\text{temp})*\alpha_{\text{AN}}(3, 1, 0, 0, 0, \text{temp}, \text{cair})$      | Wallington et al. (2018)                     |
| G43010  | TrGC   | $\text{C}_3\text{H}_7\text{O}_2 \rightarrow .8 \text{CH}_3\text{COCH}_3 + .2 \text{NPROPOL} + .6 \text{HO}_2$                                                                                                                                      | $2.*(k_{\text{CH302}}*3.\text{E}-13)**(.5)*\text{R02}$                                                         | Rickard (2022), Atkinson et al. (2006)       |
| G43011  | TrGC   | $\text{CH}_3\text{COCH}_3 + \text{OH} \rightarrow \text{CH}_3\text{COCH}_2\text{O}_2 + \text{H}_2\text{O}$                                                                                                                                         | $(8.8\text{E}-12*\text{EXP}(-1320./\text{temp}) + 1.7\text{E}-14*\text{EXP}(423./\text{temp}))$                | Atkinson et al. (2006)*                      |
| G43012a | TrGC   | $\text{CH}_3\text{COCH}_2\text{O}_2 + \text{HO}_2 \rightarrow \text{CH}_3\text{COCH}_2\text{O}_2\text{H}$                                                                                                                                          | $8.6\text{E}-13*\text{EXP}(700./\text{temp})*r_{\text{C0CH202\_00H}}$                                          | Tyndall et al. (2001a), Sander et al. (2019) |
| G43012b | TrGC   | $\text{CH}_3\text{COCH}_2\text{O}_2 + \text{HO}_2 \rightarrow \text{OH} + \text{CH}_3\text{C}(\text{O}) + \text{HCHO}$                                                                                                                             | $8.6\text{E}-13*\text{EXP}(700./\text{temp})*r_{\text{C0CH202\_0H}}$                                           | Tyndall et al. (2001a), Sander et al. (2019) |

Table 1: Gas phase reactions (... continued)

| #       | labels | reaction                                                                                                                                                     | rate coefficient                                                                                                     | reference                                             |
|---------|--------|--------------------------------------------------------------------------------------------------------------------------------------------------------------|----------------------------------------------------------------------------------------------------------------------|-------------------------------------------------------|
| G43013a | TrGCN  | $\text{CH}_3\text{COCH}_2\text{O}_2 + \text{NO} \rightarrow \text{CH}_3\text{C}(\text{O}) + \text{HCHO} + \text{NO}_2$                                       | $2.9\text{E}-12 \cdot \text{EXP}(300./\text{temp}) \cdot (1.-\alpha_{\text{AN}}(4,1,1,0,0,\text{temp},\text{cair}))$ | Burkholder et al. (2015)                              |
| G43013b | TrGCN  | $\text{CH}_3\text{COCH}_2\text{O}_2 + \text{NO} \rightarrow \text{NOA}$                                                                                      | $2.9\text{E}-12 \cdot \text{EXP}(300./\text{temp}) \cdot \alpha_{\text{AN}}(4,1,1,0,0,\text{temp},\text{cair})$      | Burkholder et al. (2015)                              |
| G43014  | TrGC   | $\text{CH}_3\text{COCH}_2\text{O}_2 \rightarrow .3 \text{CH}_3\text{C}(\text{O}) + .3 \text{HCHO} + .5 \text{MGLYOX} + .2 \text{CH}_3\text{COCH}_2\text{OH}$ | $k_{1\_R02p0R02}$                                                                                                    | Orlando and Tyndall (2012)                            |
| G43015a | TrGC   | $\text{CH}_3\text{COCH}_2\text{O}_2\text{H} + \text{OH} \rightarrow \text{CH}_3\text{COCH}_2\text{O}_2 + \text{H}_2\text{O}$                                 | $k_{\_R00HRO}$                                                                                                       | see note*                                             |
| G43015b | TrGC   | $\text{CH}_3\text{COCH}_2\text{O}_2\text{H} + \text{OH} \rightarrow \text{MGLYOX} + \text{OH} + \text{H}_2\text{O}$                                          | $k_{\_s*f\_s00H*f\_CO}$                                                                                              | Sander et al. (2019)                                  |
| G43016  | TrGC   | $\text{CH}_3\text{COCH}_2\text{OH} + \text{OH} \rightarrow \text{MGLYOX} + \text{HO}_2 + \text{H}_2\text{O}$                                                 | $1.6\text{E}-12 \cdot \text{EXP}(305./\text{temp})$                                                                  | Atkinson et al. (2006)                                |
| G43017  | TrGC   | $\text{MGLYOX} + \text{OH} \rightarrow .4 \text{CH}_3 + .6 \text{CH}_3\text{C}(\text{O}) + 1.4 \text{CO} + \text{H}_2\text{O}$                               | $1.9\text{E}-12 \cdot \text{EXP}(575./\text{temp})$                                                                  | Baeza-Romero et al. (2007),<br>Atkinson et al. (2006) |
| G43020  | TrGCN  | $\text{iC}_3\text{H}_7\text{ONO}_2 + \text{OH} \rightarrow \text{CH}_3\text{COCH}_3 + \text{NO}_2$                                                           | $6.2\text{E}-13 \cdot \text{EXP}(-230./\text{temp})$                                                                 | Wallington et al. (2018)                              |
| G43021  | TrGCN  | $\text{CH}_3\text{COCH}_2\text{O}_2 + \text{NO}_3 \rightarrow \text{CH}_3\text{C}(\text{O}) + \text{HCHO} + \text{NO}_2$                                     | $\text{KR02N03}$                                                                                                     | Rickard (2022)                                        |
| G43022  | TrGC   | $\text{HYPROPO2} \rightarrow \text{CH}_3\text{CHO} + \text{HCHO} + \text{HO}_2$                                                                              | $k_{1\_R02s0R02}$                                                                                                    | Rickard (2022)                                        |
| G43023a | TrGC   | $\text{HYPROPO2} + \text{HO}_2 \rightarrow \text{HYPROPO2H}$                                                                                                 | $k_{\_R02\_HO2}(\text{temp},3) \cdot (1.-r_{\text{CHOHCH2O2\_OH}})$                                                  | Rickard (2022)                                        |
| G43023b | TrGC   | $\text{HYPROPO2} + \text{HO}_2 \rightarrow \text{CH}_3\text{CHO} + \text{HCHO} + \text{HO}_2 + \text{OH}$                                                    | $k_{\_R02\_HO2}(\text{temp},3) \cdot r_{\text{CHOHCH2O2\_OH}}$                                                       | Rickard (2022)                                        |
| G43024a | TrGCN  | $\text{HYPROPO2} + \text{NO} \rightarrow \text{CH}_3\text{CHO} + \text{HCHO} + \text{HO}_2 + \text{NO}_2$                                                    | $\text{KR02N0} \cdot (1.-\alpha_{\text{AN}}(4,1,0,0,0,\text{temp},\text{cair}))$                                     | Rickard (2022)                                        |
| G43024b | TrGCN  | $\text{HYPROPO2} + \text{NO} \rightarrow \text{PROPOLNO3}$                                                                                                   | $\text{KR02N0} \cdot \alpha_{\text{AN}}(4,1,0,0,0,\text{temp},\text{cair})$                                          | Rickard (2022)                                        |
| G43025  | TrGCN  | $\text{HYPROPO2} + \text{NO}_3 \rightarrow \text{CH}_3\text{CHO} + \text{HCHO} + \text{HO}_2 + \text{NO}_2$                                                  | $\text{KR02N03}$                                                                                                     | Rickard (2022)                                        |
| G43026a | TrGC   | $\text{HYPROPO2H} + \text{OH} \rightarrow \text{HYPROPO2}$                                                                                                   | $k_{\_R00HRO}$                                                                                                       | Rickard (2022)                                        |
| G43026b | TrGC   | $\text{HYPROPO2H} + \text{OH} \rightarrow \text{CH}_3\text{COCH}_2\text{OH} + \text{OH}$                                                                     | $(k_{\_s*f\_s0H*f\_pCH20H} + k_{\_t*f\_t00H*f\_pCH20H})$                                                             | Sander et al. (2019)                                  |
| G43027  | TrGCN  | $\text{PRONO3BO2} + \text{HO}_2 \rightarrow \text{PR2O2HNO3}$                                                                                                | $k_{\_R02\_HO2}(\text{temp},3)$                                                                                      | Rickard (2022)                                        |
| G43028  | TrGCN  | $\text{PRONO3BO2} + \text{NO} \rightarrow \text{NOA} + \text{HO}_2 + \text{NO}_2$                                                                            | $\text{KR02N0}$                                                                                                      | Rickard (2022)*                                       |
| G43029  | TrGCN  | $\text{PRONO3BO2} + \text{NO}_3 \rightarrow \text{NOA} + \text{HO}_2 + \text{NO}_2$                                                                          | $\text{KR02N03}$                                                                                                     | Rickard (2022)                                        |
| G43030a | TrGCN  | $\text{PR2O2HNO3} + \text{OH} \rightarrow \text{PRONO3BO2}$                                                                                                  | $k_{\_R00HRO}$                                                                                                       | Rickard (2022)                                        |
| G43030b | TrGCN  | $\text{PR2O2HNO3} + \text{OH} \rightarrow \text{NOA} + \text{OH}$                                                                                            | $k_{\_t*f\_t00H*f\_CH20N02}$                                                                                         | Sander et al. (2019)                                  |
| G43031  | TrGCN  | $\text{MGLYOX} + \text{NO}_3 \rightarrow \text{CH}_3\text{C}(\text{O}) + \text{CO} + \text{HNO}_3$                                                           | $\text{KN03AL} \cdot 2.4$                                                                                            | Rickard (2022)                                        |
| G43032  | TrGCN  | $\text{NOA} + \text{OH} \rightarrow \text{MGLYOX} + \text{NO}_2$                                                                                             | $(k_{\_s*f\_CO*f\_ON02} + k_{\_p*f\_CO})$                                                                            | Sander et al. (2019)                                  |
| G43033  | TrGC   | $\text{HOCH2COCHO} + \text{OH} \rightarrow .8609 \text{HOCH2CO} + .8609 \text{CO} + .1391 \text{HCOCOCHO} + .1391 \text{HO}_2$                               | $(1.9\text{E}-12 \cdot \text{EXP}(575./\text{temp}) + k_{\_s*f\_s0H*f\_CO})$                                         | Sander et al. (2019)                                  |
| G43034  | TrGCN  | $\text{HOCH2COCHO} + \text{NO}_3 \rightarrow \text{HOCH2CO} + \text{CO} + \text{HNO}_3$                                                                      | $\text{KN03AL} \cdot 2.4$                                                                                            | Sander et al. (2019)                                  |

Table 1: Gas phase reactions (... continued)

| #       | labels | reaction                                                                                                                                                                                                                   | rate coefficient                                                                | reference                                      |
|---------|--------|----------------------------------------------------------------------------------------------------------------------------------------------------------------------------------------------------------------------------|---------------------------------------------------------------------------------|------------------------------------------------|
| G43035  | TrGC   | $\text{CH}_3\text{COCO}_2\text{H} + \text{OH} \rightarrow \text{CH}_3\text{C}(\text{O}) + \text{H}_2\text{O} + \text{CO}_2$                                                                                                | $4.9\text{E}-14 \cdot \text{EXP}(276./\text{temp})$                             | Mellouki and Mu (2003), Sander et al. (2019)   |
| G43036  | TrGC   | $\text{HCOCOCH}_2\text{O}_2 \rightarrow .6 \text{ HCOCO} + .6 \text{ HCHO} + .2 \text{ HCOCOCHO} + .2 \text{ HOCH}_2\text{COCHO}$                                                                                          | $k_{1\_R02p0R02}$                                                               | Sander et al. (2019)                           |
| G43037  | TrGCN  | $\text{HCOCOCH}_2\text{O}_2 + \text{NO} \rightarrow \text{HCOCO} + \text{HCHO} + \text{NO}_2$                                                                                                                              | $\text{KR02N0}$                                                                 | Sander et al. (2019)*                          |
| G43038a | TrGC   | $\text{HCOCOCH}_2\text{O}_2 + \text{HO}_2 \rightarrow \text{HCOCOCH}_2\text{OOH}$                                                                                                                                          | $k_{\_R02\_H02}(\text{temp}, 3) \cdot r_{\_COCH202\_00H}$                       | Sander et al. (2019)                           |
| G43038b | TrGC   | $\text{HCOCOCH}_2\text{O}_2 + \text{HO}_2 \rightarrow \text{HCOCO} + \text{HCHO} + \text{OH}$                                                                                                                              | $k_{\_R02\_H02}(\text{temp}, 3) \cdot r_{\_COCH202\_0H}$                        | Sander et al. (2019)                           |
| G43039  | TrGCN  | $\text{HCOCOCH}_2\text{O}_2 + \text{NO}_3 \rightarrow \text{HCOCO} + \text{HCHO} + \text{NO}_2$                                                                                                                            | $\text{KR02N03}$                                                                | Sander et al. (2019)                           |
| G43040a | TrGC   | $\text{HCOCOCH}_2\text{OOH} + \text{OH} \rightarrow \text{HOCH}_2\text{CO}_3 + \text{CO} + \text{H}_2\text{O}$                                                                                                             | $k_{\_t \cdot f\_CO \cdot f\_0}$                                                | Sander et al. (2019)*                          |
| G43040b | TrGC   | $\text{HCOCOCH}_2\text{OOH} + \text{OH} \rightarrow \text{HCOCOCHO} + \text{H}_2\text{O} + \text{OH}$                                                                                                                      | $k_{\_s \cdot f\_s00H \cdot f\_CO}$                                             | Sander et al. (2019)*                          |
| G43040c | TrGC   | $\text{HCOCOCH}_2\text{OOH} + \text{OH} \rightarrow \text{HCOCOCH}_2\text{O}_2 + \text{H}_2\text{O}$                                                                                                                       | $k_{\_R00HRO}$                                                                  | Sander et al. (2019)                           |
| G43041  | TrGCN  | $\text{HCOCOCH}_2\text{OOH} + \text{NO}_3 \rightarrow \text{HOCH}_2\text{CO}_3 + \text{CO} + \text{HNO}_3$                                                                                                                 | $\text{KN03AL} \cdot 2.4$                                                       | Sander et al. (2019)                           |
| G43042  | TrGC   | $\text{HOCH}_2\text{COCH}_2\text{O}_2 \rightarrow \text{HCHO} + \text{HOCH}_2\text{CO}$                                                                                                                                    | $k_{1\_R02p0R02}$                                                               | Sander et al. (2019)                           |
| G43043a | TrGC   | $\text{HOCH}_2\text{COCH}_2\text{O}_2 + \text{HO}_2 \rightarrow \text{HOCH}_2\text{COCH}_2\text{OOH}$                                                                                                                      | $k_{\_R02\_H02}(\text{temp}, 3) \cdot r_{\_COCH202\_00H}$                       | Sander et al. (2019)                           |
| G43043b | TrGC   | $\text{HOCH}_2\text{COCH}_2\text{O}_2 + \text{HO}_2 \rightarrow \text{HCHO} + \text{HOCH}_2\text{CO} + \text{OH}$                                                                                                          | $k_{\_R02\_H02}(\text{temp}, 3) \cdot r_{\_COCH202\_0H}$                        | Sander et al. (2019)                           |
| G43044  | TrGCN  | $\text{HOCH}_2\text{COCH}_2\text{O}_2 + \text{NO} \rightarrow \text{HCHO} + \text{HOCH}_2\text{CO} + \text{NO}_2$                                                                                                          | $\text{KR02N0}$                                                                 | Sander et al. (2019)*                          |
| G43045a | TrGC   | $\text{HOCH}_2\text{COCH}_2\text{OOH} + \text{OH} \rightarrow \text{HOCH}_2\text{COCHO} + \text{OH}$                                                                                                                       | $k_{\_s \cdot f\_s00H \cdot f\_CO}$                                             | Sander et al. (2019)                           |
| G43045b | TrGC   | $\text{HOCH}_2\text{COCH}_2\text{OOH} + \text{OH} \rightarrow \text{HOCH}_2\text{COCH}_2\text{O}_2$                                                                                                                        | $k_{\_R00HRO}$                                                                  | Sander et al. (2019)                           |
| G43045c | TrGC   | $\text{HOCH}_2\text{COCH}_2\text{OOH} + \text{OH} \rightarrow \text{HCOCOCH}_2\text{OOH} + \text{HO}_2$                                                                                                                    | $1.60\text{E}-12 \cdot \text{EXP}(305./\text{temp})$                            | Sander et al. (2019)*                          |
| G43046  | TrGC   | $\text{CH}_3\text{CHCO} + \text{OH} \rightarrow .72 \text{ CO} + .72 \text{ CH}_3\text{CHO} + .72 \text{ HO}_2 + .21 \text{ CH}_3\text{COCO}_2\text{H} + .07 \text{ CH}_3\text{CHO} + .07 \text{ HO}_2 + .07 \text{ CO}_2$ | $7.6\text{E}-11$                                                                | Hatakeyama et al. (1985), Sander et al. (2019) |
| G43047  | TrGCN  | $\text{PROPOLNO}_3 + \text{OH} \rightarrow \text{CH}_3\text{COCH}_2\text{OH} + \text{NO}_2$                                                                                                                                | $k_{\_t \cdot f\_ON02 \cdot f\_pCH20H} + k_{\_s \cdot f\_s0H \cdot f\_CH20N02}$ | Sander et al. (2019)                           |
| G43048  | TrGCN  | $\text{CH}_3\text{COCH}_2\text{O}_2 + \text{NO}_2 \rightarrow \text{CH}_3\text{COCH}_2\text{OONO}_2$                                                                                                                       | $2.3\text{E}-12 \cdot \text{EXP}(300./\text{temp})$                             | Tyndall et al. (2001a)*                        |
| G43049  | TrGCN  | $\text{CH}_3\text{COCH}_2\text{OONO}_2 \rightarrow \text{CH}_3\text{COCH}_2\text{O}_2 + \text{NO}_2$                                                                                                                       | $1.9\text{E}16 \cdot \text{EXP}(-10830./\text{temp})$                           | Sehested et al. (1998)*                        |
| G43050  | TrGCN  | $\text{CH}_3\text{COCH}_2\text{OONO}_2 + \text{OH} \rightarrow \text{MGlyOX} + \text{NO}_3 + \text{H}_2\text{O}$                                                                                                           | $9.50\text{E}-13 \cdot \text{EXP}(-650./\text{temp}) \cdot f_{\_CO}$            | Sander et al. (2019)*                          |
| G43051a | TrGC   | $\text{C}_3\text{H}_7\text{OOH} + \text{OH} \rightarrow \text{C}_3\text{H}_7\text{O}_2 + \text{H}_2\text{O}$                                                                                                               | $k_{\_R00HRO}$                                                                  | Sander et al. (2019)                           |
| G43051b | TrGC   | $\text{C}_3\text{H}_7\text{OOH} + \text{OH} \rightarrow \text{C}_2\text{H}_5\text{CHO} + \text{H}_2\text{O} + \text{OH}$                                                                                                   | $k_{\_s \cdot f\_s00H}$                                                         | Sander et al. (2019)                           |
| G43051c | TrGC   | $\text{C}_3\text{H}_7\text{OOH} + \text{OH} \rightarrow \text{C}_2\text{H}_5\text{CHO} + \text{HO}_2 + \text{H}_2\text{O}$                                                                                                 | $k_{\_s \cdot f\_pCH20H}$                                                       | Sander et al. (2019)*                          |
| G43052  | TrGC   | $\text{C}_2\text{H}_5\text{CHO} + \text{OH} \rightarrow \text{C}_2\text{H}_5\text{CO}_3 + \text{H}_2\text{O}$                                                                                                              | $4.9\text{E}-12 \cdot \text{EXP}(405./\text{temp})$                             | Atkinson et al. (2006)*                        |
| G43053  | TrGCN  | $\text{C}_2\text{H}_5\text{CHO} + \text{NO}_3 \rightarrow \text{C}_2\text{H}_5\text{CO}_3 + \text{HNO}_3$                                                                                                                  | $6.3\text{E}-15$                                                                | Atkinson et al. (2006)                         |
| G43054a | TrGC   | $\text{C}_2\text{H}_5\text{CO}_3 \rightarrow \text{C}_2\text{H}_5\text{O}_2 + \text{CO}_2$                                                                                                                                 | $k_{1\_R02RC03} \cdot 0.9$                                                      | Sander et al. (2019)                           |
| G43054b | TrGC   | $\text{C}_2\text{H}_5\text{CO}_3 \rightarrow \text{C}_2\text{H}_5\text{CO}_2\text{H}$                                                                                                                                      | $k_{1\_R02RC03} \cdot 0.1$                                                      | Sander et al. (2019)                           |
| G43055a | TrGC   | $\text{C}_2\text{H}_5\text{CO}_3 + \text{HO}_2 \rightarrow \text{C}_2\text{H}_5\text{O}_2 + \text{CO}_2 + \text{OH}$                                                                                                       | $\text{KAPH02} \cdot r_{\_C03\_0H}$                                             | Sander et al. (2019), Groß et al. (2014)       |

Table 1: Gas phase reactions (... continued)

| #       | labels  | reaction                                                                                                                   | rate coefficient                                                        | reference                                     |
|---------|---------|----------------------------------------------------------------------------------------------------------------------------|-------------------------------------------------------------------------|-----------------------------------------------|
| G43055b | TrGC    | $\text{C}_2\text{H}_5\text{CO}_3 + \text{HO}_2 \rightarrow \text{C}_2\text{H}_5\text{CO}_3\text{H}$                        | KAPH02*r_C03_00H                                                        | Sander et al. (2019), Groß et al. (2014)      |
| G43055c | TrGC    | $\text{C}_2\text{H}_5\text{CO}_3 + \text{HO}_2 \rightarrow \text{C}_2\text{H}_5\text{CO}_2\text{H} + \text{O}_3$           | KAPH02*r_C03_03                                                         | Sander et al. (2019), Groß et al. (2014)      |
| G43056  | TrGCN   | $\text{C}_2\text{H}_5\text{CO}_3 + \text{NO} \rightarrow \text{NO}_2 + \text{C}_2\text{H}_5\text{O}_2 + \text{CO}_2$       | KAPNO                                                                   | Rickard (2022)                                |
| G43057  | TrGCN   | $\text{C}_2\text{H}_5\text{CO}_3 + \text{NO}_2 \rightarrow \text{PPN}$                                                     | k_CH3C03_N02                                                            | Rickard (2022)                                |
| G43058  | TrGCN   | $\text{PPN} \rightarrow \text{C}_2\text{H}_5\text{CO}_3 + \text{NO}_2$                                                     | k_PAN_M                                                                 | Rickard (2022)                                |
| G43059  | TrGC    | $\text{C}_2\text{H}_5\text{CO}_2\text{H} + \text{OH} \rightarrow \text{CH}_3\text{CHO} + \text{CO}_2 + \text{H}_2\text{O}$ | k_C02H+k_p+k_s*f_C02H                                                   | Sander et al. (2019)*                         |
| G43060a | TrGC    | $\text{C}_2\text{H}_5\text{CO}_3\text{H} + \text{OH} \rightarrow \text{C}_2\text{H}_5\text{CO}_3 + \text{H}_2\text{O}$     | k_R00HRO                                                                | Sander et al. (2019)                          |
| G43060b | TrGC    | $\text{C}_2\text{H}_5\text{CO}_3\text{H} + \text{OH} \rightarrow \text{CH}_3\text{CHO} + \text{CO}_2 + \text{H}_2\text{O}$ | k_s*f_C02H+k_p                                                          | Sander et al. (2019)*                         |
| G43061  | TrGCN   | $\text{PPN} + \text{OH} \rightarrow \text{CH}_3\text{CHO} + \text{CO}_2 + \text{NO}_2 + \text{H}_2\text{O}$                | k_s*f_cpan+k_p                                                          | Sander et al. (2019)*                         |
| G43062  | TrGC    | $\text{CH}_3\text{COCO}_3\text{H} + \text{OH} \rightarrow \text{CH}_3\text{COCO}_3 + \text{H}_2\text{O}$                   | k_R00HRO                                                                | Sander et al. (2019)                          |
| G43063a | TrGC    | $\text{CH}_3\text{COCO}_3 + \text{HO}_2 \rightarrow \text{CH}_3\text{C}(\text{O}) + \text{CO}_2 + \text{OH}$               | KAPH02*r_C03_OH                                                         | Sander et al. (2019)                          |
| G43063b | TrGC    | $\text{CH}_3\text{COCO}_3 + \text{HO}_2 \rightarrow \text{CH}_3\text{COCO}_3\text{H}$                                      | KAPH02*(r_C03_00H+r_C03_03)                                             | Sander et al. (2019)                          |
| G43064  | TrGCN   | $\text{CH}_3\text{COCO}_3 + \text{NO} \rightarrow \text{CH}_3\text{C}(\text{O}) + \text{CO}_2 + \text{NO}_2$               | KAPNO                                                                   | Sander et al. (2019)                          |
| G43065  | TrGCN   | $\text{CH}_3\text{COCO}_3 + \text{NO}_2 \rightarrow \text{CH}_3\text{C}(\text{O}) + \text{CO}_2 + \text{NO}_3$             | k_CH3C03_N02                                                            | Sander et al. (2019)*                         |
| G43066  | TrGCN   | $\text{CH}_3\text{COCO}_3 + \text{NO}_3 \rightarrow \text{CH}_3\text{C}(\text{O})\text{OO} + \text{CO}_2 + \text{NO}_2$    | KR02N03*1.74                                                            | Sander et al. (2019)                          |
| G43067  | TrGC    | $\text{CH}_3\text{COCO}_3 \rightarrow \text{CH}_3\text{C}(\text{O})\text{OO} + \text{CO}_2$                                | k1_R02RC03                                                              | Sander et al. (2019)                          |
| G43068  | TrGC    | $\text{HCOCOCHO} + \text{OH} \rightarrow 3 \text{CO} + \text{HO}_2$                                                        | 2.*k_t*f_CO*f_0                                                         | Sander et al. (2019)                          |
| G43069  | TrGC    | $\text{IPROPOL} + \text{OH} \rightarrow \text{CH}_3\text{COCH}_3 + \text{HO}_2 + \text{H}_2\text{O}$                       | 2.6E-12*EXP(200./temp)                                                  | Atkinson et al. (2006)                        |
| G43070a | TrGC    | $\text{NPROPOL} + \text{OH} \rightarrow \text{C}_2\text{H}_5\text{CHO} + \text{HO}_2 + \text{H}_2\text{O}$                 | 4.6E-12*EXP(70./temp)*(k_s*f_sOH/(k_p+k_s*f_pCH2OH+k_s*f_sOH))          | Atkinson et al. (2006), Sander et al. (2019)* |
| G43070b | TrGC    | $\text{NPROPOL} + \text{OH} \rightarrow \text{HYPROPO}_2 + \text{H}_2\text{O}$                                             | 4.6E-12*EXP(70./temp)*((k_p+k_s*f_pCH2OH)/(k_p+k_s*f_pCH2OH+k_s*f_sOH)) | Atkinson et al. (2006), Sander et al. (2019)* |
| G43071a | TrGC    | $\text{CH}_2\text{CHCH}_2\text{OH} + \text{OH} \rightarrow \text{HCOOH} + \text{OH} + \text{CH}_3\text{CHO}$               | k_CH2CHOH_OH_HCOOH                                                      | Sander et al. (2019), So et al. (2014)*       |
| G43072  | TrGC    | $\text{CH}_2\text{CHCH}_2\text{OH} + \text{HCOOH} \rightarrow \text{C}_2\text{H}_5\text{CHO} + \text{HCOOH}$               | k_CH2CHOH_HCOOH                                                         | Sander et al. (2019), da Silva (2010)*        |
| G43073  | TrGC    | $\text{C}_2\text{H}_5\text{CHO} + \text{HCOOH} \rightarrow \text{CH}_2\text{CHCH}_2\text{OH} + \text{HCOOH}$               | k_ALD_HCOOH                                                             | Sander et al. (2019), da Silva (2010)*        |
| G43074  | TrGC    | $\text{HCOCOCH}_2\text{OOH} + \text{OH} \rightarrow \text{HCOCO} + \text{CO} + \text{HO}_2 + \text{OH}$                    | k_s*f_s00H*f_CO+k_R00HRO                                                | Sander et al. (2019)*                         |
| G43075a | TrGC    | $\text{CH}_3\text{COCHOHOH} + \text{OH} \rightarrow \text{CH}_3\text{C}(\text{O}) + \text{HCOOH} + \text{H}_2\text{O}$     | 2.0 * k_rohro                                                           | see note*                                     |
| G43075b | TrGC    | $\text{CH}_3\text{COCHOHOH} + \text{OH} \rightarrow \text{CH}_3\text{COCO}_2\text{H} + \text{H}_2\text{O}$                 | k_t*f_toh*f_toh*f_co                                                    | see note*                                     |
| G43202  | TrGTerC | $\text{HCOCH}_2\text{CHO} + \text{OH} \rightarrow \text{HCOCH}_2\text{CO}_3$                                               | 4.29E-11                                                                | Rickard (2022)                                |

Table 1: Gas phase reactions (... continued)

| #       | labels   | reaction                                                                                                                   | rate coefficient                                                                | reference            |
|---------|----------|----------------------------------------------------------------------------------------------------------------------------|---------------------------------------------------------------------------------|----------------------|
| G43203  | TrGTerCN | $\text{HCOCH}_2\text{CHO} + \text{NO}_3 \rightarrow \text{HCOCH}_2\text{CO}_3 + \text{HNO}_3$                              | $2.*\text{KN03AL}*2.4$                                                          | Rickard (2022)       |
| G43204a | TrGTerC  | $\text{HCOCH}_2\text{CO}_3 \rightarrow \text{HCOCH}_2\text{O}_2 + \text{CO}_2$                                             | $\text{k1\_R02RC03}*0.9$                                                        | Sander et al. (2019) |
| G43204b | TrGTerC  | $\text{HCOCH}_2\text{CO}_3 \rightarrow \text{HCOCH}_2\text{CO}_2\text{H}$                                                  | $\text{k1\_R02RC03}*0.1$                                                        | Sander et al. (2019) |
| G43205  | TrGTerCN | $\text{HCOCH}_2\text{CO}_3 + \text{NO} \rightarrow \text{HCOCH}_2\text{O}_2 + \text{CO}_2 + \text{NO}_2$                   | KAPNO                                                                           | Rickard (2022)       |
| G43206  | TrGTerCN | $\text{HCOCH}_2\text{CO}_3 + \text{NO}_2 \rightarrow \text{C}_3\text{PAN}_2$                                               | $\text{k\_CH3C03\_N02}$                                                         | Rickard (2022)       |
| G43207a | TrGTerC  | $\text{HCOCH}_2\text{CO}_3 + \text{HO}_2 \rightarrow \text{HCOCH}_2\text{CO}_3\text{H}$                                    | $\text{KAPH02}*r\_C03\_00\text{H}$                                              | Rickard (2022)       |
| G43207b | TrGTerC  | $\text{HCOCH}_2\text{CO}_3 + \text{HO}_2 \rightarrow \text{HCOCH}_2\text{CO}_2\text{H} + \text{O}_3$                       | $\text{KAPH02}*r\_C03\_03$                                                      | Rickard (2022)       |
| G43207c | TrGTerC  | $\text{HCOCH}_2\text{CO}_3 + \text{HO}_2 \rightarrow \text{HCOCH}_2\text{O}_2 + \text{CO}_2 + \text{OH}$                   | $\text{KAPH02}*r\_C03\_0\text{H}$                                               | Rickard (2022)       |
| G43210  | TrGTerCN | $\text{C}_3\text{PAN}_2 \rightarrow \text{HCOCH}_2\text{CO}_3 + \text{NO}_2$                                               | $\text{k\_PAN\_M}$                                                              | Rickard (2022)       |
| G43211  | TrGTerCN | $\text{C}_3\text{PAN}_2 + \text{OH} \rightarrow \text{GLYOX} + \text{CO} + \text{NO}_2$                                    | $2.10\text{E}-11$                                                               | Rickard (2022)       |
| G43212  | TrGTerC  | $\text{HCOCH}_2\text{CO}_2\text{H} + \text{OH} \rightarrow \text{HCOCH}_2\text{O}_2 + \text{CO}_2$                         | $2.14\text{E}-11$                                                               | Rickard (2022)       |
| G43213a | TrGTerC  | $\text{HOC}_2\text{H}_4\text{CO}_3 \rightarrow \text{HOCH}_2\text{CH}_2\text{O}_2 + \text{CO}_2$                           | $\text{k1\_R02RC03}*0.9$                                                        | Sander et al. (2019) |
| G43213b | TrGTerC  | $\text{HOC}_2\text{H}_4\text{CO}_3 \rightarrow \text{HOC}_2\text{H}_4\text{CO}_2\text{H}$                                  | $\text{k1\_R02RC03}*0.1$                                                        | Sander et al. (2019) |
| G43214  | TrGTerCN | $\text{HOC}_2\text{H}_4\text{CO}_3 + \text{NO} \rightarrow \text{HOCH}_2\text{CH}_2\text{O}_2 + \text{CO}_2 + \text{NO}_2$ | KAPNO                                                                           | Rickard (2022)       |
| G43215a | TrGTerC  | $\text{HOC}_2\text{H}_4\text{CO}_3 + \text{HO}_2 \rightarrow \text{HOC}_2\text{H}_4\text{CO}_3\text{H}$                    | $\text{KAPH02}*r\_C03\_00\text{H}$                                              | Rickard (2022)       |
| G43215b | TrGTerC  | $\text{HOC}_2\text{H}_4\text{CO}_3 + \text{HO}_2 \rightarrow \text{HOCH}_2\text{CH}_2\text{O}_2 + \text{CO}_2 + \text{OH}$ | $\text{KAPH02}*r\_C03\_0\text{H}$                                               | Rickard (2022)       |
| G43215c | TrGTerC  | $\text{HOC}_2\text{H}_4\text{CO}_3 + \text{HO}_2 \rightarrow \text{HOC}_2\text{H}_4\text{CO}_2\text{H} + \text{O}_3$       | $\text{KAPH02}*r\_C03\_03$                                                      | Rickard (2022)       |
| G43218  | TrGTerCN | $\text{HOC}_2\text{H}_4\text{CO}_3 + \text{NO}_2 \rightarrow \text{C}_3\text{PAN}_1$                                       | $\text{k\_CH3C03\_N02}$                                                         | Rickard (2022)       |
| G43219  | TrGTerC  | $\text{HOC}_2\text{H}_4\text{CO}_2\text{H} + \text{OH} \rightarrow \text{HOCH}_2\text{CH}_2\text{O}_2 + \text{CO}_2$       | $1.39\text{E}-11$                                                               | Rickard (2022)       |
| G43220  | TrGTerC  | $\text{HOC}_2\text{H}_4\text{CO}_3\text{H} + \text{OH} \rightarrow \text{HOC}_2\text{H}_4\text{CO}_3$                      | $1.73\text{E}-11$                                                               | Rickard (2022)       |
| G43221  | TrGTerCN | $\text{C}_3\text{PAN}_1 \rightarrow \text{HOC}_2\text{H}_4\text{CO}_3 + \text{NO}_2$                                       | $\text{k\_PAN\_M}$                                                              | Rickard (2022)       |
| G43222  | TrGTerCN | $\text{C}_3\text{PAN}_1 + \text{OH} \rightarrow \text{HOCH}_2\text{CHO} + \text{CO} + \text{NO}_2$                         | $4.51\text{E}-12$                                                               | Rickard (2022)       |
| G43223  | TrGTerC  | $\text{HCOCH}_2\text{CO}_3\text{H} + \text{OH} \rightarrow \text{HCOCH}_2\text{O}_2 + \text{CO}_2 + \text{H}_2\text{O}$    | $2.49\text{E}-11$                                                               | Rickard (2022)*      |
| G43415  | TrGAroC  | $\text{C3DIALOOH} + \text{OH} \rightarrow \text{HCOCOCHO} + \text{OH}$                                                     | $1.44\text{E}-10$                                                               | Rickard (2022)       |
| G43418a | TrGAroC  | $\text{C3DIALO}_2 + \text{HO}_2 \rightarrow \text{C3DIALOOH}$                                                              | $\text{k\_R02\_H02}(\text{temp}, 3) * (\text{r\_C03\_00H} + \text{r\_C03\_03})$ | Rickard (2022)       |
| G43418b | TrGAroC  | $\text{C3DIALO}_2 + \text{HO}_2 \rightarrow \text{GLYOX} + \text{CO} + \text{HO}_2 + \text{OH}$                            | $\text{k\_R02\_H02}(\text{temp}, 3) * \text{r\_C03\_0H}$                        | Rickard (2022)       |
| G43419  | TrGAroCN | $\text{C3DIALO}_2 + \text{NO} \rightarrow \text{GLYOX} + \text{CO} + \text{HO}_2 + \text{NO}_2$                            | KR02N0                                                                          | Rickard (2022)*      |
| G43420  | TrGAroCN | $\text{C3DIALO}_2 + \text{NO}_3 \rightarrow \text{GLYOX} + \text{CO} + \text{HO}_2 + \text{NO}_2$                          | KR02N03                                                                         | Rickard (2022)*      |
| G43421  | TrGAroC  | $\text{C3DIALO}_2 \rightarrow \text{GLYOX} + \text{CO} + \text{HO}_2$                                                      | $\text{k1\_R02s0R02}$                                                           | Rickard (2022)*      |
| G43422a | TrGAroC  | $\text{HCOCOHHCO}_3 + \text{HO}_2 \rightarrow \text{GLYOX} + \text{CO}_2 + \text{HO}_2 + \text{OH}$                        | $\text{KAPH02}*r\_C03\_0\text{H}$                                               | Rickard (2022)       |
| G43422b | TrGAroC  | $\text{HCOCOHHCO}_3 + \text{HO}_2 \rightarrow \text{HCOCOHHCO}_3\text{H}$                                                  | $\text{KAPH02} * (\text{r\_C03\_00H} + \text{r\_C03\_03})$                      | Rickard (2022)       |
| G43424  | TrGAroCN | $\text{HCOCOHHCO}_3 + \text{NO} \rightarrow \text{GLYOX} + \text{CO}_2 + \text{HO}_2 + \text{NO}_2$                        | KAPNO                                                                           | Rickard (2022)       |
| G43425  | TrGAroCN | $\text{HCOCOHHCO}_3 + \text{NO}_2 \rightarrow \text{HCOCOHPAN}$                                                            | $\text{k\_CH3C03\_N02}$                                                         | Rickard (2022)       |
| G43426  | TrGAroCN | $\text{HCOCOHHCO}_3 + \text{NO}_3 \rightarrow \text{GLYOX} + \text{CO}_2 + \text{HO}_2 + \text{NO}_2$                      | $\text{KR02N03}*1.74$                                                           | Rickard (2022)       |



Table 1: Gas phase reactions (... continued)

| #       | labels   | reaction                                                                                                                                                                            | rate coefficient                                                                                                                                                                               | reference                             |
|---------|----------|-------------------------------------------------------------------------------------------------------------------------------------------------------------------------------------|------------------------------------------------------------------------------------------------------------------------------------------------------------------------------------------------|---------------------------------------|
| G43427  | TrGAroC  | $\text{HCOCOHCO}_3 \rightarrow \text{GLYOX} + \text{CO}_2 + \text{HO}_2$                                                                                                            | k1_R02RC03                                                                                                                                                                                     | Rickard (2022)                        |
| G43428  | TrGAroC  | $\text{METACETHO} + \text{OH} \rightarrow \text{CH}_3\text{C}(\text{O}) + \text{CO}_2$                                                                                              | 9.82E-11                                                                                                                                                                                       | Rickard (2022)                        |
| G43442  | TrGAroCN | $\text{HCOCOH PAN} + \text{OH} \rightarrow \text{GLYOX} + \text{CO} + \text{NO}_2$                                                                                                  | 6.97E-11                                                                                                                                                                                       | Rickard (2022)                        |
| G43443  | TrGAroCN | $\text{HCOCOH PAN} \rightarrow \text{HCOCOHCO}_3 + \text{NO}_2$                                                                                                                     | k_PAN_M                                                                                                                                                                                        | Rickard (2022)                        |
| G43444  | TrGAroC  | $\text{C}_3\text{OH}_2\text{CO} + \text{OH} \rightarrow \text{HCOCOHCO}_3$                                                                                                          | 1.36E-10                                                                                                                                                                                       | Rickard (2022)                        |
| G43446  | TrGAroC  | $\text{HCOCOHCO}_3\text{H} + \text{OH} \rightarrow \text{HCOCOHCO}_3$                                                                                                               | 7.33E-11                                                                                                                                                                                       | Rickard (2022)                        |
| G44000  | TrGC     | $\text{C}_4\text{H}_{10} + \text{OH} \rightarrow \text{LC}_4\text{H}_9\text{O}_2 + \text{H}_2\text{O}$                                                                              | $2.03\text{E-}17 \cdot \text{temp} \cdot \text{temp} \cdot \text{EXP}(78./\text{temp})$                                                                                                        | Atkinson et al. (2006)*               |
| G44001a | TrGC     | $\text{LC}_4\text{H}_9\text{O}_2 \rightarrow \text{C}_3\text{H}_7\text{CHO} + \text{HO}_2$                                                                                          | $(k1\_R02pR02 \cdot 0.1273 + k1\_R02sR02 \cdot 0.8727) \cdot 0.1273$                                                                                                                           | Rickard (2022), Sander et al. (2019)  |
| G44001b | TrGC     | $\text{LC}_4\text{H}_9\text{O}_2 \rightarrow .636 \text{ MEK} + .636 \text{ HO}_2 + .364 \text{ CH}_3\text{CHO} + .364 \text{ C}_2\text{H}_5\text{O}_2$                             | $(k1\_R02pR02 \cdot 0.1273 + k1\_R02sR02 \cdot 0.8727) \cdot 0.8727$                                                                                                                           | Rickard (2022), Sander et al. (2019)* |
| G44002  | TrGC     | $\text{LC}_4\text{H}_9\text{O}_2 + \text{HO}_2 \rightarrow \text{LC}_4\text{H}_9\text{OOH}$                                                                                         | k_R02_H02(temp, 4)                                                                                                                                                                             | Rickard (2022)                        |
| G44003a | TrGCN    | $\text{LC}_4\text{H}_9\text{O}_2 + \text{NO} \rightarrow \text{NO}_2 + \text{C}_3\text{H}_7\text{CHO} + \text{HO}_2$                                                                | $\text{KR02N0} \cdot (1 - (0.1273 \cdot \alpha_{\text{AN}}(4, 1, 0, 0, 0, \text{temp}, \text{cair}) + 0.8727 \cdot \alpha_{\text{AN}}(4, 2, 0, 0, 0, \text{temp}, \text{cair}))) \cdot 0.1273$ | Rickard (2022), Sander et al. (2019)  |
| G44003b | TrGCN    | $\text{LC}_4\text{H}_9\text{O}_2 + \text{NO} \rightarrow \text{NO}_2 + .636 \text{ MEK} + .636 \text{ HO}_2 + .364 \text{ CH}_3\text{CHO} + .364 \text{ C}_2\text{H}_5\text{O}_2$   | $\text{KR02N0} \cdot (1 - (0.1273 \cdot \alpha_{\text{AN}}(4, 1, 0, 0, 0, \text{temp}, \text{cair}) + 0.8727 \cdot \alpha_{\text{AN}}(4, 2, 0, 0, 0, \text{temp}, \text{cair}))) \cdot 0.8727$ | Rickard (2022), Sander et al. (2019)  |
| G44003c | TrGCN    | $\text{LC}_4\text{H}_9\text{O}_2 + \text{NO} \rightarrow \text{LC}_4\text{H}_9\text{NO}_3$                                                                                          | $\text{KR02N0} \cdot (0.1273 \cdot \alpha_{\text{AN}}(4, 1, 0, 0, 0, \text{temp}, \text{cair}) + 0.8727 \cdot \alpha_{\text{AN}}(4, 2, 0, 0, 0, \text{temp}, \text{cair}))$                    | Rickard (2022)*                       |
| G44004a | TrGCN    | $\text{LC}_4\text{H}_9\text{O}_2 + \text{NO}_3 \rightarrow \text{NO}_2 + \text{C}_3\text{H}_7\text{CHO} + \text{HO}_2$                                                              | $\text{KR02N03} \cdot 0.1273$                                                                                                                                                                  | Rickard (2022), Sander et al. (2019)  |
| G44004b | TrGCN    | $\text{LC}_4\text{H}_9\text{O}_2 + \text{NO}_3 \rightarrow \text{NO}_2 + .636 \text{ MEK} + .636 \text{ HO}_2 + .364 \text{ CH}_3\text{CHO} + .364 \text{ C}_2\text{H}_5\text{O}_2$ | $\text{KR02N03} \cdot 0.8727$                                                                                                                                                                  | Rickard (2022), Sander et al. (2019)  |
| G44005a | TrGC     | $\text{LC}_4\text{H}_9\text{OOH} + \text{OH} \rightarrow \text{LC}_4\text{H}_9\text{O}_2 + \text{H}_2\text{O}$                                                                      | k_R00HRO                                                                                                                                                                                       | Sander et al. (2019)                  |
| G44005b | TrGC     | $\text{LC}_4\text{H}_9\text{OOH} + \text{OH} \rightarrow \text{C}_3\text{H}_7\text{CHO} + \text{H}_2\text{O} + \text{OH}$                                                           | $k\_s \cdot f\_t00H \cdot f\_alk \cdot (k\_p / (k\_p + k\_s))$                                                                                                                                 | Sander et al. (2019)                  |
| G44005c | TrGC     | $\text{LC}_4\text{H}_9\text{OOH} + \text{OH} \rightarrow \text{MEK} + \text{H}_2\text{O} + \text{OH}$                                                                               | $k\_t \cdot f\_t00H \cdot f\_alk \cdot (k\_s / (k\_p + k\_s))$                                                                                                                                 | Sander et al. (2019)                  |
| G44006a | TrGC     | $\text{iC}_4\text{H}_{10} + \text{OH} \rightarrow \text{TC}_4\text{H}_9\text{O}_2 + \text{H}_2\text{O}$                                                                             | $1.17\text{E-}17 \cdot \text{temp} \cdot \text{temp} \cdot \text{EXP}(213./\text{temp}) \cdot k\_t / (3 \cdot k\_p + k\_t)$                                                                    | Atkinson (2003)                       |
| G44006b | TrGC     | $\text{iC}_4\text{H}_{10} + \text{OH} \rightarrow \text{IC}_4\text{H}_9\text{O}_2 + \text{H}_2\text{O}$                                                                             | $1.17\text{E-}17 \cdot \text{temp} \cdot \text{temp} \cdot \text{EXP}(213./\text{temp}) \cdot 3 \cdot k\_p / (3 \cdot k\_p + k\_t)$                                                            | Atkinson (2003)                       |
| G44007  | TrGC     | $\text{TC}_4\text{H}_9\text{O}_2 \rightarrow \text{CH}_3\text{COCH}_3 + \text{CH}_3$                                                                                                | k1_R02tR02                                                                                                                                                                                     | Rickard (2022), Sander et al. (2019)  |
| G44008  | TrGC     | $\text{TC}_4\text{H}_9\text{O}_2 + \text{HO}_2 \rightarrow \text{TC}_4\text{H}_9\text{OOH}$                                                                                         | k_R02_H02(temp, 4)                                                                                                                                                                             | Rickard (2022)                        |

Table 1: Gas phase reactions (... continued)

| #       | labels | reaction                                                                                                                                                                                                                                                                                                                                                                                                                                  | rate coefficient                                                                                                                           | reference                                     |
|---------|--------|-------------------------------------------------------------------------------------------------------------------------------------------------------------------------------------------------------------------------------------------------------------------------------------------------------------------------------------------------------------------------------------------------------------------------------------------|--------------------------------------------------------------------------------------------------------------------------------------------|-----------------------------------------------|
| G44009a | TrGCN  | $\text{TC}_4\text{H}_9\text{O}_2 + \text{NO} \rightarrow \text{NO}_2 + \text{CH}_3\text{COCH}_3 + \text{CH}_3$                                                                                                                                                                                                                                                                                                                            | $\text{KR02N0}*(1.-\alpha_{\text{AN}}(4,3,0,0,0,\text{temp},\text{cair}))$                                                                 | Rickard (2022), Sander et al. (2019)          |
| G44009b | TrGCN  | $\text{TC}_4\text{H}_9\text{O}_2 + \text{NO} \rightarrow \text{TC4H9NO3}$                                                                                                                                                                                                                                                                                                                                                                 | $\text{KR02N0}*\alpha_{\text{AN}}(4,3,0,0,0,\text{temp},\text{cair})$                                                                      | Rickard (2022)                                |
| G44010a | TrGC   | $\text{TC}_4\text{H}_9\text{OOH} + \text{OH} \rightarrow \text{TC}_4\text{H}_9\text{O}_2 + \text{H}_2\text{O}$                                                                                                                                                                                                                                                                                                                            | $k_{\text{ROOHR0}}$                                                                                                                        | Sander et al. (2019)                          |
| G44010b | TrGC   | $\text{TC}_4\text{H}_9\text{OOH} + \text{OH} \rightarrow \text{CH}_3\text{COCH}_3 + \text{HCHO} + \text{OH} + \text{H}_2\text{O}$                                                                                                                                                                                                                                                                                                         | $3.*k_{\text{p}}*f_{\text{tCH2OH}}$                                                                                                        | Sander et al. (2019)*                         |
| G44011  | TrGCN  | $\text{TC4H9NO3} + \text{OH} \rightarrow \text{CH}_3\text{COCH}_3 + \text{HCHO} + \text{NO}_2 + \text{H}_2\text{O}$                                                                                                                                                                                                                                                                                                                       | $3.*k_{\text{p}}*f_{\text{CH2ON02}}$                                                                                                       | Sander et al. (2019)*                         |
| G44012  | TrGC   | $\text{IC}_4\text{H}_9\text{O}_2 \rightarrow \text{IPRCHO}$                                                                                                                                                                                                                                                                                                                                                                               | $k1_{\text{R02sR02}}$                                                                                                                      | Rickard (2022), Sander et al. (2019)          |
| G44013  | TrGC   | $\text{IC}_4\text{H}_9\text{O}_2 + \text{HO}_2 \rightarrow \text{IC}_4\text{H}_9\text{OOH}$                                                                                                                                                                                                                                                                                                                                               | $k_{\text{R02\_H02}}(\text{temp},4)$                                                                                                       | Rickard (2022)                                |
| G44014a | TrGCN  | $\text{IC}_4\text{H}_9\text{O}_2 + \text{NO} \rightarrow \text{NO}_2 + \text{IPRCHO}$                                                                                                                                                                                                                                                                                                                                                     | $\text{KR02N0}*(1.-\alpha_{\text{AN}}(4,2,0,0,0,\text{temp},\text{cair}))$                                                                 | Rickard (2022), Sander et al. (2019)          |
| G44014b | TrGCN  | $\text{IC}_4\text{H}_9\text{O}_2 + \text{NO} \rightarrow \text{IC4H9NO3}$                                                                                                                                                                                                                                                                                                                                                                 | $\text{KR02N0}*\alpha_{\text{AN}}(4,2,0,0,0,\text{temp},\text{cair})$                                                                      | Rickard (2022)                                |
| G44015a | TrGC   | $\text{IC}_4\text{H}_9\text{OOH} + \text{OH} \rightarrow \text{IC}_4\text{H}_9\text{O}_2 + \text{H}_2\text{O}$                                                                                                                                                                                                                                                                                                                            | $k_{\text{ROOHR0}}$                                                                                                                        | Sander et al. (2019)                          |
| G44015b | TrGC   | $\text{IC}_4\text{H}_9\text{OOH} + \text{OH} \rightarrow \text{IPRCHO} + \text{OH} + \text{H}_2\text{O}$                                                                                                                                                                                                                                                                                                                                  | $k_{\text{s}}*f_{\text{sOOH}}+2.*k_{\text{s}}+k_{\text{t}}*f_{\text{pCH2OH}}$                                                              | Sander et al. (2019)*                         |
| G44016  | TrGCN  | $\text{IC4H9NO3} + \text{OH} \rightarrow \text{IPRCHO} + \text{NO}_2 + \text{H}_2\text{O}$                                                                                                                                                                                                                                                                                                                                                | $k_{\text{s}}*f_{\text{ON02}}+2.*k_{\text{p}}+k_{\text{t}}*f_{\text{CH2ON02}}$                                                             | Sander et al. (2019)*                         |
| G44017  | TrGC   | $\text{MVK} + \text{O}_3 \rightarrow .87 \text{ MGLYOX} + .5481 \text{ CO} + .1392 \text{ HO}_2 + .1392 \text{ OH} + .3219 \text{ CH}_2\text{OO} + .13 \text{ HCHO} + .04680 \text{ OH} + .04680 \text{ CO} + .07280 \text{ CH}_3\text{C(O)} + .026 \text{ CH}_3\text{CHO} + .026 \text{ CO}_2 + .026 \text{ HCHO} + .026 \text{ HO}_2 + .02402 \text{ MGLYOX} + .02402 \text{ H}_2\text{O}_2 + .00718 \text{ CH}_3\text{COCO}_2\text{H}$ | $8.5\text{E}-16*\text{EXP}(-1520./\text{temp})$                                                                                            | Sander et al. (2019)                          |
| G44018  | TrGC   | $\text{MVK} + \text{OH} \rightarrow \text{LHMKABO2}$                                                                                                                                                                                                                                                                                                                                                                                      | $2.6\text{E}-12*\text{EXP}(610./\text{temp})$                                                                                              | Sander et al. (2019), Atkinson et al. (2006)* |
| G44019  | TrGC   | $\text{MEK} + \text{OH} \rightarrow \text{LMEKO2} + \text{H}_2\text{O}$                                                                                                                                                                                                                                                                                                                                                                   | $1.5\text{E}-12*\text{EXP}(-90./\text{temp})$                                                                                              | Atkinson et al. (2006), Sander et al. (2019)* |
| G44020  | TrGC   | $\text{LMEKO2} + \text{HO}_2 \rightarrow \text{LMEKOOH}$                                                                                                                                                                                                                                                                                                                                                                                  | $k_{\text{R02\_H02}}(\text{temp},4)$                                                                                                       | Sander et al. (2019)                          |
| G44021a | TrGCN  | $\text{LMEKO2} + \text{NO} \rightarrow .62 \text{ CH}_3\text{CHO} + .62 \text{ CH}_3\text{C(O)} + .38 \text{ HCHO} + .38 \text{ CO}_2 + .38 \text{ HOCH}_2\text{CH}_2\text{O}_2 + \text{NO}_2$                                                                                                                                                                                                                                            | $\text{KR02N0}*(1.-(.62*\alpha_{\text{AN}}(4,2,1,0,0,\text{temp},\text{cair})+.38*\alpha_{\text{AN}}(4,1,0,1,0,\text{temp},\text{cair})))$ | Sander et al. (2019)*                         |
| G44021b | TrGCN  | $\text{LMEKO2} + \text{NO} \rightarrow \text{LMEKNO3}$                                                                                                                                                                                                                                                                                                                                                                                    | $\text{KR02N0}*(.62*\alpha_{\text{AN}}(4,2,1,0,0,\text{temp},\text{cair})+.38*\alpha_{\text{AN}}(4,1,0,1,0,\text{temp},\text{cair}))$      | Sander et al. (2019)                          |
| G44022a | TrGC   | $\text{LMEKOOH} + \text{OH} \rightarrow \text{LMEKO2} + \text{H}_2\text{O}$                                                                                                                                                                                                                                                                                                                                                               | $k_{\text{ROOHR0}}$                                                                                                                        | Sander et al. (2019)                          |

Table 1: Gas phase reactions (... continued)

| #       | labels | reaction                                                                                                                                                                                                                                                                   | rate coefficient                                                                                                                                                    | reference                                    |
|---------|--------|----------------------------------------------------------------------------------------------------------------------------------------------------------------------------------------------------------------------------------------------------------------------------|---------------------------------------------------------------------------------------------------------------------------------------------------------------------|----------------------------------------------|
| G44022b | TrGC   | $\text{LMEKOOH} + \text{OH} \rightarrow .62 \text{ BIACET} + .38 \text{ HCHO} + .38 \text{ CO}_2 + .38 \text{ HOCH}_2\text{CH}_2\text{O}_2 + \text{H}_2\text{O} + \text{OH}$                                                                                               | $(.62*k_{\text{t}}*f_{\text{t00H}}*f_{\text{CO}}+.38*k_{\text{s}}*f_{\text{s00H}})$                                                                                 | Sander et al. (2019)                         |
| G44023a | TrGCN  | $\text{LC4H9NO}_3 + \text{OH} \rightarrow \text{MEK} + \text{NO}_2 + \text{H}_2\text{O}$                                                                                                                                                                                   | $(k_{\text{t}}*f_{\text{ON02}}*f_{\text{alk}}+k_{\text{p}}*f_{\text{alk}}+k_{\text{s}}*f_{\text{CH2ON02}}+k_{\text{p}})*(k_{\text{s}}/(k_{\text{p}}+k_{\text{s}}))$ | Sander et al. (2019)*                        |
| G44023b | TrGCN  | $\text{LC4H9NO}_3 + \text{OH} \rightarrow \text{C}_3\text{H}_7\text{CHO} + \text{NO}_2 + \text{H}_2\text{O}$                                                                                                                                                               | $(k_{\text{p}}+k_{\text{s}}*(1.+f_{\text{CH2ON02}}+f_{\text{ON02}})*f_{\text{alk}})*(k_{\text{p}}/(k_{\text{p}}+k_{\text{s}}))$                                     | Sander et al. (2019)*                        |
| G44024  | TrGCN  | $\text{MPAN} + \text{OH} \rightarrow \text{CH}_3\text{COCH}_2\text{OH} + \text{CO} + \text{NO}_2$                                                                                                                                                                          | $3.2\text{E}-11$                                                                                                                                                    | Orlando et al. (2002)                        |
| G44025  | TrGCN  | $\text{MPAN} \rightarrow \text{MACO}_3 + \text{NO}_2$                                                                                                                                                                                                                      | $k_{\text{PAN\_M}}$                                                                                                                                                 | see note*                                    |
| G44026  | TrGC   | $\text{LMEKO}_2 \rightarrow .538 \text{ HCHO} + .538 \text{ CO}_2 + .459 \text{ HOCH}_2\text{CH}_2\text{O}_2 + .079 \text{ C}_2\text{H}_5\text{O}_2 + .462 \text{ CH}_3\text{C(O)} + .462 \text{ CH}_3\text{CHO}$                                                          | $(.62*k_{\text{1\_R02s0R02}}+.38*k_{\text{1\_R02p0R02}})$                                                                                                           | Rickard (2022)*                              |
| G44027  | TrGC   | $\text{MACR} + \text{OH} \rightarrow .45 \text{ MACO}_3 + .55 \text{ MACRO}_2$                                                                                                                                                                                             | $8.\text{E}-12*\text{EXP}(380./\text{temp})$                                                                                                                        | Orlando et al. (1999b), Sander et al. (2019) |
| G44028  | TrGC   | $\text{MACR} + \text{O}_3 \rightarrow .5481 \text{ CO} + .1392 \text{ HO}_2 + .1392 \text{ OH} + .3219 \text{ CH}_2\text{OO} + .87 \text{ MGLYOX} + .13 \text{ HCHO} + .13 \text{ OH} + .065 \text{ HCOCOCH}_2\text{O}_2 + .065 \text{ CO} + .065 \text{ CH}_3\text{C(O)}$ | $1.36\text{E}-15*\text{EXP}(-2112./\text{temp})$                                                                                                                    | Sander et al. (2019)                         |
| G44029  | TrGCN  | $\text{MACR} + \text{NO}_3 \rightarrow \text{MACO}_3 + \text{HNO}_3$                                                                                                                                                                                                       | $\text{KN03AL}*2.0$                                                                                                                                                 | Rickard (2022)                               |
| G44030a | TrGC   | $\text{MACO}_3 \rightarrow \text{CH}_3\text{C(O)} + \text{HCHO} + \text{CO}_2$                                                                                                                                                                                             | $k_{\text{1\_R02RC03}}*0.9$                                                                                                                                         | Sander et al. (2019)                         |
| G44030b | TrGC   | $\text{MACO}_3 \rightarrow \text{MACO}_2\text{H}$                                                                                                                                                                                                                          | $k_{\text{1\_R02RC03}}*0.1$                                                                                                                                         | Sander et al. (2019)                         |
| G44031a | TrGC   | $\text{MACO}_3 + \text{HO}_2 \rightarrow \text{MACO}_2 + \text{OH}$                                                                                                                                                                                                        | $\text{KAPH02}*r_{\text{C03\_OH}}$                                                                                                                                  | Sander et al. (2019)                         |
| G44031b | TrGC   | $\text{MACO}_3 + \text{HO}_2 \rightarrow \text{MACO}_3\text{H}$                                                                                                                                                                                                            | $\text{KAPH02}*r_{\text{C03\_00H}}$                                                                                                                                 | Sander et al. (2019)                         |
| G44031c | TrGC   | $\text{MACO}_3 + \text{HO}_2 \rightarrow \text{MACO}_2\text{H} + \text{O}_3$                                                                                                                                                                                               | $\text{KAPH02}*r_{\text{C03\_03}}$                                                                                                                                  | Sander et al. (2019)                         |
| G44032  | TrGCN  | $\text{MACO}_3 + \text{NO} \rightarrow \text{MACO}_2 + \text{NO}_2$                                                                                                                                                                                                        | $8.70\text{E}-12*\text{EXP}(290./\text{temp})$                                                                                                                      | Sander et al. (2019)                         |
| G44033  | TrGCN  | $\text{MACO}_3 + \text{NO}_2 \rightarrow \text{MPAN}$                                                                                                                                                                                                                      | $k_{\text{CH3C03\_N02}}$                                                                                                                                            | Rickard (2022)                               |
| G44034  | TrGCN  | $\text{MACO}_3 + \text{NO}_3 \rightarrow \text{MACO}_2 + \text{NO}_2$                                                                                                                                                                                                      | $\text{KR02N03}*1.74$                                                                                                                                               | Sander et al. (2019)                         |
| G44035  | TrGC   | $\text{MACRO}_2 \rightarrow .7 \text{ CH}_3\text{COCH}_2\text{OH} + .7 \text{ HCHO} + .7 \text{ HO}_2 + .3 \text{ MACROH}$                                                                                                                                                 | $k_{\text{1\_R02t0R02}}$                                                                                                                                            | Rickard (2022)*                              |
| G44036a | TrGC   | $\text{MACRO}_2 + \text{HO}_2 \rightarrow \text{MACRO} + \text{OH}$                                                                                                                                                                                                        | $k_{\text{R02\_H02}}(\text{temp},4)*r_{\text{COCH202\_OH}}$                                                                                                         | Sander et al. (2019)                         |
| G44036b | TrGC   | $\text{MACRO}_2 + \text{HO}_2 \rightarrow \text{MACROOH}$                                                                                                                                                                                                                  | $k_{\text{R02\_H02}}(\text{temp},4)*r_{\text{COCH202\_00H}}$                                                                                                        | Sander et al. (2019)                         |
| G44037a | TrGCN  | $\text{MACRO}_2 + \text{NO} \rightarrow \text{MACRO} + \text{NO}_2$                                                                                                                                                                                                        | $\text{KR02N0}*(1.-\alpha_{\text{AN}}(6,3,1,0,0,\text{temp},\text{cair}))$                                                                                          | Sander et al. (2019)                         |
| G44037b | TrGCN  | $\text{MACRO}_2 + \text{NO} \rightarrow \text{MACRNO}_3$                                                                                                                                                                                                                   | $\text{KR02N0}*\alpha_{\text{AN}}(6,3,1,0,0,\text{temp},\text{cair})$                                                                                               | Sander et al. (2019)                         |
| G44038  | TrGCN  | $\text{MACRO}_2 + \text{NO}_3 \rightarrow \text{MACRO} + \text{NO}_2$                                                                                                                                                                                                      | $\text{KR02N03}$                                                                                                                                                    | Sander et al. (2019)                         |
| G44039a | TrGC   | $\text{MACROOH} + \text{OH} \rightarrow \text{MACRO}_2$                                                                                                                                                                                                                    | $k_{\text{ROOHRO}}$                                                                                                                                                 | Sander et al. (2019)                         |

Table 1: Gas phase reactions (... continued)

| #       | labels | reaction                                                                                                                                                                            | rate coefficient                                                                 | reference             |
|---------|--------|-------------------------------------------------------------------------------------------------------------------------------------------------------------------------------------|----------------------------------------------------------------------------------|-----------------------|
| G44039b | TrGC   | MACROOH + OH $\rightarrow$ CO + CH <sub>3</sub> COCH <sub>2</sub> OH + OH                                                                                                           | k_t*f_0*f_tCH2OH*f_alk                                                           | Sander et al. (2019)  |
| G44039c | TrGC   | MACROOH + OH $\rightarrow$ CO + MGLYOX + HO <sub>2</sub>                                                                                                                            | (k_s*f_sOH*f_pCH2OH + k_R0HRO)                                                   | Sander et al. (2019)  |
| G44040  | TrGC   | MACROH + OH $\rightarrow$ CH <sub>3</sub> COCH <sub>2</sub> OH + CO + HO <sub>2</sub>                                                                                               | k_t*f_0*f_tCH2OH*f_alk                                                           | Sander et al. (2019)  |
| G44041  | TrGC   | MACRO $\rightarrow$ .885 CH <sub>3</sub> COCH <sub>2</sub> OH + .885 CO + .115 MGLYOX + .115 HCHO + HO <sub>2</sub>                                                                 | KDEC                                                                             | Sander et al. (2019)  |
| G44042  | TrGC   | MACO2H + OH $\rightarrow$ CH <sub>3</sub> COCH <sub>2</sub> OH + HO <sub>2</sub> + CO <sub>2</sub>                                                                                  | ((k_adt+k_adp)*a_CO2H+k_CO2H)                                                    | Sander et al. (2019)  |
| G44043a | TrGC   | MACO3H + OH $\rightarrow$ CH <sub>3</sub> COCH <sub>2</sub> OH + CO <sub>2</sub> + OH                                                                                               | (k_adt+k_adp)*a_CO2H                                                             | Sander et al. (2019)  |
| G44043b | TrGC   | MACO3H + OH $\rightarrow$ MACO3                                                                                                                                                     | k_R00HRO                                                                         | Sander et al. (2019)  |
| G44044  | TrGC   | LHMKABO2 $\rightarrow$ .024 CO2H3CHO + .072 MGLYOX + .072 HO <sub>2</sub> + .072 HCHO + .5280 CH <sub>3</sub> C(O) + .5280 HOCH <sub>2</sub> CHO + .176 BIACETOH + .2 HO12CO3C4     | (.12*k1_R02pOR02+.88*k1_R02sOR02)                                                | Sander et al. (2019)  |
| G44045a | TrGC   | LHMKABO2 + HO <sub>2</sub> $\rightarrow$ OH + HOCH <sub>2</sub> CHO + CH <sub>3</sub> C(O)                                                                                          | k_R02_HO2(temp,4)*.88*r_COCH2O2_OH                                               | Sander et al. (2019)  |
| G44045b | TrGC   | LHMKABO2 + HO <sub>2</sub> $\rightarrow$ LHMKABOOH                                                                                                                                  | k_R02_HO2(temp,4)*( (.12+.88*r_COCH2O2_OO)H)                                     | Sander et al. (2019)  |
| G44046a | TrGCN  | LHMKABO2 + NO $\rightarrow$ .12 MGLYOX + .12 HO <sub>2</sub> + .88 HOCH <sub>2</sub> CHO + .88 CH <sub>3</sub> C(O) + .12 HCHO + NO <sub>2</sub>                                    | KR02NO*(1-(.12*alpha_AN(6,1,0,1,0,temp,cair)+.88*alpha_AN(6,2,1,0,0,temp,cair))) | Sander et al. (2019)  |
| G44046b | TrGCN  | LHMKABO2 + NO $\rightarrow$ MVKNO3                                                                                                                                                  | KR02NO*(.12*alpha_AN(6,1,0,1,0,temp,cair)+.88*alpha_AN(6,2,1,0,0,temp,cair))     | Sander et al. (2019)* |
| G44047  | TrGCN  | LHMKABO2 + NO <sub>3</sub> $\rightarrow$ .12 MGLYOX + .12 HO <sub>2</sub> + .88 HOCH <sub>2</sub> CHO + .88 CH <sub>3</sub> C(O) + .12 HCHO + .12 HO <sub>2</sub> + NO <sub>2</sub> | KR02NO3                                                                          | Sander et al. (2019)  |
| G44048a | TrGC   | LHMKABOOH + OH $\rightarrow$ LHMKABO2                                                                                                                                               | k_R00HRO                                                                         | Sander et al. (2019)  |
| G44048b | TrGC   | LHMKABOOH + OH $\rightarrow$ .12 CO2H3CHO + .88 BIACETOH + OH                                                                                                                       | (.12*k_s*f_sOOH*f_pCH2OH+.88*k_t*f_tOOH*f_pCH2OH*f_CO)                           | Sander et al. (2019)  |
| G44049a | TrGC   | CO2H3CHO + OH $\rightarrow$ CO2H3CO3                                                                                                                                                | k_t*f_0*f_alk                                                                    | Sander et al. (2019)  |
| G44049b | TrGC   | CO2H3CHO + OH $\rightarrow$ CH <sub>3</sub> COCOCHO + HO <sub>2</sub> + H <sub>2</sub> O                                                                                            | k_t*f_CO*f_tOH*f_CHO                                                             | Sander et al. (2019)  |
| G44050  | TrGCN  | CO2H3CHO + NO <sub>3</sub> $\rightarrow$ CO2H3CO3 + HNO <sub>3</sub>                                                                                                                | KN03AL*4.0                                                                       | Rickard (2022)        |
| G44051  | TrGC   | CO2H3CO3 $\rightarrow$ MGLYOX + HO <sub>2</sub> + CO <sub>2</sub>                                                                                                                   | k1_R02RCO3                                                                       | Sander et al. (2019)  |
| G44052a | TrGC   | CO2H3CO3 + HO <sub>2</sub> $\rightarrow$ OH + MGLYOX + HO <sub>2</sub> + CO <sub>2</sub>                                                                                            | KAPH02*r_CO3_OH                                                                  | Sander et al. (2019)  |
| G44052b | TrGC   | CO2H3CO3 + HO <sub>2</sub> $\rightarrow$ CO2H3CO2H + O <sub>3</sub>                                                                                                                 | KAPH02*r_CO3_O3                                                                  | Sander et al. (2019)  |
| G44052c | TrGC   | CO2H3CO3 + HO <sub>2</sub> $\rightarrow$ CO2H3CO3H                                                                                                                                  | KAPH02*r_CO3_OOH                                                                 | Sander et al. (2019)  |
| G44053  | TrGCN  | CO2H3CO3 + NO $\rightarrow$ MGLYOX + HO <sub>2</sub> + NO <sub>2</sub> + CO <sub>2</sub>                                                                                            | KAPNO                                                                            | Sander et al. (2019)  |

Table 1: Gas phase reactions (... continued)

| #       | labels | reaction                                                                                                                                                                           | rate coefficient                                                                                 | reference             |
|---------|--------|------------------------------------------------------------------------------------------------------------------------------------------------------------------------------------|--------------------------------------------------------------------------------------------------|-----------------------|
| G44054  | TrGCN  | $\text{CO}_2\text{H}_3\text{CO}_3 + \text{NO}_3 \rightarrow \text{MGLYOX} + \text{HO}_2 + \text{NO}_2 + \text{CO}_2$                                                               | $\text{KRO2NO3} \times 1.74$                                                                     | Sander et al. (2019)  |
| G44055a | TrGC   | $\text{CO}_2\text{H}_3\text{CO}_3\text{H} + \text{OH} \rightarrow \text{CO}_2\text{H}_3\text{CO}_3$                                                                                | $k_{\text{ROOHR0}}$                                                                              | Sander et al. (2019)  |
| G44055b | TrGC   | $\text{CO}_2\text{H}_3\text{CO}_3\text{H} + \text{OH} \rightarrow \text{CH}_3\text{C}(\text{O}) + \text{CO} + \text{CO}_2 + \text{OH}$                                             | $(k_{\text{t}*\text{f}_{\text{CO2H}*}\text{f}_{\text{CO}*}\text{f}_{\text{tOH}})$                | Sander et al. (2019)  |
| G44056  | TrGC   | $\text{CO}_2\text{H}_3\text{CO}_2\text{H} + \text{OH} \rightarrow \text{CH}_3\text{COCOCOC}_2\text{H} + \text{HO}_2$                                                               | $k_{\text{t}*\text{f}_{\text{CO2H}*}\text{f}_{\text{CO}*}\text{f}_{\text{tOH}}+k_{\text{CO2H}}}$ | Sander et al. (2019)  |
| G44057a | TrGC   | $\text{HO}_2\text{CO}_3\text{C}_4 + \text{OH} \rightarrow \text{BIACETOH} + \text{HO}_2$                                                                                           | $k_{\text{t}*\text{f}_{\text{tOH}*}\text{f}_{\text{alk}*}\text{f}_{\text{CO}}}$                  | Sander et al. (2019)  |
| G44057b | TrGC   | $\text{HO}_2\text{CO}_3\text{C}_4 + \text{OH} \rightarrow \text{CO}_2\text{H}_3\text{CHO} + \text{HO}_2$                                                                           | $k_{\text{s}*\text{f}_{\text{sOH}*}\text{f}_{\text{alk}}}$                                       | Sander et al. (2019)  |
| G44058  | TrGC   | $\text{MACO}_2 \rightarrow .65 \text{CH}_3 + .65 \text{CO} + .65 \text{HCHO} + .35 \text{OH} + .35 \text{CH}_3\text{COCH}_2\text{O}_2 + \text{CO}_2$                               | KDEC                                                                                             | Sander et al. (2019)  |
| G44059  | TrGC   | $\text{LHMVKABO}_2 \rightarrow .88 \text{MGLYOX} + .88 \text{HCHO} + .12 \text{HOOCH}_2\text{CHO} + .12 \text{CH}_3\text{C}(\text{O}) + \text{OH}$                                 | $k_{\text{hsd}}$                                                                                 | Sander et al. (2019)  |
| G44060  | TrGC   | $\text{MACRO}_2 \rightarrow \text{MGLYOX} + \text{HCHO} + \text{OH}$                                                                                                               | $k_{\text{hsb}}$                                                                                 | Sander et al. (2019)  |
| G44061a | TrGCN  | $\text{MVKNO}_3 + \text{OH} \rightarrow \text{MGLYOX} + \text{CO}_2 + \text{HO}_2 + \text{NO}_2 + \text{H}_2\text{O}$                                                              | $k_{\text{s}*\text{f}_{\text{sOOH}*}\text{f}_{\text{CH2ON02}}+k_{\text{ROHR0}}}$                 | Sander et al. (2019)* |
| G44061b | TrGCN  | $\text{MVKNO}_3 + \text{OH} \rightarrow \text{BIACETOH} + \text{NO}_2 + \text{H}_2\text{O}$                                                                                        | $k_{\text{t}*\text{f}_{\text{ON02}*}\text{f}_{\text{CO}*}\text{f}_{\text{pCH2OH}}}$              | Sander et al. (2019)* |
| G44062a | TrGCN  | $\text{MACRNO}_3 + \text{OH} \rightarrow \text{CH}_3\text{COCH}_2\text{OH} + \text{CO}_2 + \text{NO}_2 + \text{H}_2\text{O}$                                                       | $k_{\text{t}*\text{f}_{\text{O}*}\text{f}_{\text{CH2ON02}}}$                                     | Sander et al. (2019)* |
| G44062b | TrGCN  | $\text{MACRNO}_3 + \text{OH} \rightarrow \text{MGLYOX} + \text{CO} + \text{NO}_2 + \text{H}_2\text{O}$                                                                             | $k_{\text{ROHR0}}+k_{\text{s}*\text{f}_{\text{sOOH}*}\text{f}_{\text{CH2ON02}}}$                 | Sander et al. (2019)* |
| G44063  | TrGC   | $\text{MACRO}_2 \rightarrow \text{CH}_3\text{COCH}_2\text{OH} + \text{OH} + \text{CO}$                                                                                             | $k_{14\text{hsa1}}$                                                                              | Sander et al. (2019)  |
| G44064  | TrGC   | $\text{EZCH}_3\text{CO}_2\text{CHCHO} \rightarrow .9 \text{CH}_3\text{COCHCO} + .1 \text{CH}_3\text{C}(\text{O}) + .01 \text{GLYOX} + .18 \text{CO} + .09 \text{HO}_2 + \text{OH}$ | $k_{15\text{hs24vynal}}$                                                                         | Sander et al. (2019)  |
| G44065  | TrGC   | $\text{EZCH}_3\text{CO}_2\text{CHCHO} + \text{HO}_2 \rightarrow \text{CH}_3\text{COOHCHCHO}$                                                                                       | $k_{\text{R02\_H02}}(\text{temp}, 4)$                                                            | Sander et al. (2019)  |
| G44066  | TrGCN  | $\text{EZCH}_3\text{CO}_2\text{CHCHO} + \text{NO} \rightarrow \text{CH}_3\text{COCHO}_2\text{CHO} + \text{NO}_2$                                                                   | KRO2NO                                                                                           | Sander et al. (2019)* |
| G44067  | TrGCN  | $\text{EZCH}_3\text{CO}_2\text{CHCHO} + \text{NO}_3 \rightarrow \text{CH}_3\text{COCHO}_2\text{CHO} + \text{NO}_2$                                                                 | KRO2NO3                                                                                          | Sander et al. (2019)  |
| G44068  | TrGC   | $\text{EZCH}_3\text{CO}_2\text{CHCHO} \rightarrow \text{CH}_3\text{COCHO}_2\text{CHO}$                                                                                             | $k_{1\_R02\text{sOR02}}$                                                                         | Sander et al. (2019)  |
| G44069  | TrGC   | $\text{EZCHOCCH}_3\text{CHO}_2 \rightarrow \text{HCOCCH}_3\text{CO} + \text{OH}$                                                                                                   | $k_{15\text{hs24vynal}}$                                                                         | Sander et al. (2019)  |
| G44070  | TrGCN  | $\text{EZCHOCCH}_3\text{CHO}_2 + \text{NO} \rightarrow \text{HCOCO}_2\text{CH}_3\text{CHO} + \text{NO}_2$                                                                          | KRO2NO                                                                                           | Sander et al. (2019)* |
| G44071  | TrGC   | $\text{EZCHOCCH}_3\text{CHO}_2 + \text{HO}_2 \rightarrow \text{HCOCCH}_3\text{CHOOH}$                                                                                              | $k_{\text{R02\_H02}}(\text{temp}, 4)$                                                            | Sander et al. (2019)  |
| G44072  | TrGCN  | $\text{EZCHOCCH}_3\text{CHO}_2 + \text{NO}_3 \rightarrow \text{HCOCO}_2\text{CH}_3\text{CHO} + \text{NO}_2$                                                                        | KRO2NO3                                                                                          | Sander et al. (2019)  |
| G44073  | TrGC   | $\text{EZCHOCCH}_3\text{CHO}_2 \rightarrow \text{HCOCO}_2\text{CH}_3\text{CHO}$                                                                                                    | $k_{1\_R02\text{pOR02}}$                                                                         | Sander et al. (2019)  |
| G44074  | TrGC   | $\text{CH}_3\text{COOHCHCHO} \rightarrow \text{CH}_3\text{COCHO}_2\text{CHO} + \text{OH}$                                                                                          | $k_{\text{hydec}}$                                                                               | Sander et al. (2019)  |
| G44075  | TrGC   | $\text{HCOCCH}_3\text{CHOOH} \rightarrow \text{HCOCO}_2\text{CH}_3\text{CHO} + \text{OH}$                                                                                          | $k_{\text{hydec}}$                                                                               | Sander et al. (2019)  |
| G44076  | TrGCN  | $\text{CH}_3\text{COCHO}_2\text{CHO} + \text{NO} \rightarrow \text{CH}_3\text{C}(\text{O}) + \text{GLYOX} + \text{NO}_2$                                                           | KRO2NO                                                                                           | Sander et al. (2019)* |
| G44077  | TrGCN  | $\text{CH}_3\text{COCHO}_2\text{CHO} + \text{NO}_3 \rightarrow \text{CH}_3\text{C}(\text{O}) + \text{GLYOX} + \text{NO}_2$                                                         | KRO2NO3                                                                                          | Sander et al. (2019)  |
| G44078  | TrGC   | $\text{CH}_3\text{COCHO}_2\text{CHO} + \text{HO}_2 \rightarrow \text{CH}_3\text{C}(\text{O}) + \text{GLYOX} + \text{OH}$                                                           | $k_{\text{R02\_H02}}(\text{temp}, 4)$                                                            | Sander et al. (2019)* |
| G44079  | TrGC   | $\text{CH}_3\text{COCHO}_2\text{CHO} \rightarrow \text{CH}_3\text{C}(\text{O}) + \text{GLYOX}$                                                                                     | $k_{1\_R02\text{sOR02}}$                                                                         | Sander et al. (2019)  |

Table 1: Gas phase reactions (... continued)

| #       | labels | reaction                                                                                                                                                                                    | rate coefficient                                                     | reference                                          |
|---------|--------|---------------------------------------------------------------------------------------------------------------------------------------------------------------------------------------------|----------------------------------------------------------------------|----------------------------------------------------|
| G44080  | TrGC   | $\text{HCOCO}_2\text{CH}_3\text{CHO} \rightarrow \text{MGLYOX} + \text{CO} + \text{HO}_2$                                                                                                   | $k1\_R02t0R02$                                                       | Sander et al. (2019)                               |
| G44081  | TrGCN  | $\text{HCOCO}_2\text{CH}_3\text{CHO} + \text{NO} \rightarrow \text{MGLYOX} + \text{CO} + \text{HO}_2 + \text{NO}_2$                                                                         | $\text{KR02N0}$                                                      | Sander et al. (2019)*                              |
| G44082  | TrGC   | $\text{HCOCO}_2\text{CH}_3\text{CHO} + \text{HO}_2 \rightarrow \text{MGLYOX} + \text{CO} + \text{HO}_2 + \text{OH}$                                                                         | $k\_R02\_H02(\text{temp}, 4)$                                        | Sander et al. (2019)*                              |
| G44083  | TrGCN  | $\text{HCOCO}_2\text{CH}_3\text{CHO} + \text{NO}_3 \rightarrow \text{MGLYOX} + \text{CO} + \text{HO}_2 + \text{NO}_2$                                                                       | $\text{KR02N03}$                                                     | Sander et al. (2019)                               |
| G44084  | TrGC   | $\text{HCOCCH}_3\text{CO} + \text{OH} \rightarrow \text{CO} + \text{MGLYOX} + \text{HO}_2$                                                                                                  | $1\text{E}-10*a\_CH0$                                                | Hatakeyama et al. (1985),<br>Sander et al. (2019)  |
| G44085  | TrGC   | $\text{CH}_3\text{COCHCO} + \text{OH} \rightarrow \text{CO} + \text{MGLYOX} + \text{HO}_2$                                                                                                  | $7.6\text{E}-11*a\_COCH3$                                            | Hatakeyama et al. (1985),<br>Sander et al. (2019)* |
| G44086  | TrGCN  | $\text{LMEKNO}_3 + \text{OH} \rightarrow .62 \text{ MGLYOX} + .62 \text{ HCHO} + .62 \text{ HO}_2 + .62 \text{ NO}_2 + .38 \text{ CH}_3\text{C(O)} + .38 \text{ NO}_3\text{CH}_2\text{CHO}$ | $.62*(k\_p*(f\_CO+f\_CH2ON02)) + .38*(k\_s*f\_CH2ON02*f\_CO)$        | Sander et al. (2019)*                              |
| G44087  | TrGC   | $\text{MEPROPENE} + \text{OH} \rightarrow \text{IBUTOLBO}_2$                                                                                                                                | $9.4\text{E}-12*\text{EXP}(505./\text{temp})$                        | Atkinson et al. (2006)                             |
| G44088a | TrGC   | $\text{MEPROPENE} + \text{O}_3 \rightarrow \text{CH}_3\text{COCH}_3 + \text{CH}_2\text{OO}^*$                                                                                               | $2.7\text{E}-15*\text{EXP}(-1630./\text{temp})*0.33$                 | Atkinson et al. (2006), Sander et al. (2019)       |
| G44088b | TrGC   | $\text{MEPROPENE} + \text{O}_3 \rightarrow \text{CH}_3\text{COCH}_2\text{O}_2 + \text{OH} + \text{HCHO}$                                                                                    | $2.7\text{E}-15*\text{EXP}(-1630./\text{temp})*0.67$                 | Atkinson et al. (2006), Sander et al. (2019)       |
| G44089  | TrGCN  | $\text{MEPROPENE} + \text{NO}_3 \rightarrow \text{CH}_3\text{COCH}_3 + \text{HCHO} + \text{NO}_2$                                                                                           | $3.4\text{E}-13$                                                     | Atkinson et al. (2006), Sander et al. (2019)*      |
| G44090  | TrGC   | $\text{IBUTOLBO}_2 \rightarrow \text{CH}_3\text{COCH}_3 + \text{HCHO} + \text{HO}_2$                                                                                                        | $k1\_R02t0R02$                                                       | Sander et al. (2019)                               |
| G44091a | TrGC   | $\text{IBUTOLBO}_2 + \text{HO}_2 \rightarrow \text{IBUTOLBOOH}$                                                                                                                             | $k\_R02\_H02(\text{temp}, 4)*r\_COCH202\_00H$                        | Sander et al. (2019)                               |
| G44091b | TrGC   | $\text{IBUTOLBO}_2 + \text{HO}_2 \rightarrow \text{CH}_3\text{COCH}_3 + \text{HCHO} + \text{HO}_2 + \text{OH}$                                                                              | $k\_R02\_H02(\text{temp}, 4)*r\_COCH202\_0H$                         | Sander et al. (2019)                               |
| G44092a | TrGCN  | $\text{IBUTOLBO}_2 + \text{NO} \rightarrow \text{CH}_3\text{COCH}_3 + \text{HCHO} + \text{HO}_2 + \text{NO}_2$                                                                              | $\text{KR02N0}*(1.-\alpha\_AN(5,3,0,0,0, \text{temp}, \text{cair}))$ | Sander et al. (2019)                               |
| G44092b | TrGCN  | $\text{IBUTOLBO}_2 + \text{NO} \rightarrow \text{IBUTOLBNO}_3$                                                                                                                              | $\text{KR02N0}*\alpha\_AN(5,3,0,0,0, \text{temp}, \text{cair})$      | Sander et al. (2019)                               |
| G44093  | TrGCN  | $\text{IBUTOLBO}_2 + \text{NO}_3 \rightarrow \text{CH}_3\text{COCH}_3 + \text{HCHO} + \text{HO}_2 + \text{NO}_2$                                                                            | $\text{KR02N03}$                                                     | Sander et al. (2019)                               |
| G44094a | TrGC   | $\text{IBUTOLBOOH} + \text{OH} \rightarrow \text{IBUTOLBO}_2$                                                                                                                               | $k\_R00HRO$                                                          | Sander et al. (2019)                               |
| G44094b | TrGC   | $\text{IBUTOLBOOH} + \text{OH} \rightarrow \text{CH}_3\text{COCH}_3 + \text{HCHO} + \text{HO}_2$                                                                                            | $k\_s*f\_s00H*f\_pCH20H$                                             | Sander et al. (2019)                               |
| G44095  | TrGCN  | $\text{IBUTOLBNO}_3 + \text{OH} \rightarrow \text{CH}_3\text{COCH}_3 + \text{HCHO} + \text{HO}_2 + \text{NO}_2$                                                                             | $3.*k\_p$                                                            | Sander et al. (2019)                               |
| G44096  | TrGC   | $\text{BUT1ENE} + \text{OH} \rightarrow \text{LBUT1ENO}_2$                                                                                                                                  | $6.6\text{E}-12*\text{EXP}(465./\text{temp})$                        | Atkinson et al. (2006)*                            |

Table 1: Gas phase reactions (... continued)

| #       | labels | reaction                                                                                                                                                                                                                            | rate coefficient                                     | reference                                     |
|---------|--------|-------------------------------------------------------------------------------------------------------------------------------------------------------------------------------------------------------------------------------------|------------------------------------------------------|-----------------------------------------------|
| G44097a | TrGC   | BUT1ENE + O <sub>3</sub> → HCHO + .5 C <sub>2</sub> H <sub>5</sub> CHO + .5 H <sub>2</sub> O <sub>2</sub> + .5 CH <sub>3</sub> CHO + .5 CO + .5 HO <sub>2</sub>                                                                     | 3.35E-15*EXP(-1745./temp)*.57                        | Atkinson et al. (2006), Sander et al. (2019)* |
| G44097b | TrGC   | BUT1ENE + O <sub>3</sub> → C <sub>2</sub> H <sub>5</sub> CHO + CH <sub>2</sub> OO*                                                                                                                                                  | 3.35E-15*EXP(-1745./temp)*.43                        | Atkinson et al. (2006), Sander et al. (2019)* |
| G44098  | TrGCN  | BUT1ENE + NO <sub>3</sub> → C <sub>2</sub> H <sub>5</sub> CHO + HCHO + NO <sub>2</sub>                                                                                                                                              | 3.2E-13*EXP(-950./temp)                              | Atkinson et al. (2006), Sander et al. (2019)* |
| G44099  | TrGC   | LBUT1ENO2 → C <sub>2</sub> H <sub>5</sub> CHO + HCHO + HO <sub>2</sub>                                                                                                                                                              | k1_R02sOR02                                          | Sander et al. (2019)                          |
| G44100a | TrGC   | LBUT1ENO2 + HO <sub>2</sub> → LBUT1ENOOH                                                                                                                                                                                            | k_R02_H02(temp,4)*r_COCH202_00H                      | Sander et al. (2019)                          |
| G44100b | TrGC   | LBUT1ENO2 + HO <sub>2</sub> → C <sub>2</sub> H <sub>5</sub> CHO + HCHO + HO <sub>2</sub> + OH                                                                                                                                       | k_R02_H02(temp,4)*r_COCH202_0H                       | Sander et al. (2019)                          |
| G44101a | TrGCN  | LBUT1ENO2 + NO → C <sub>2</sub> H <sub>5</sub> CHO + HCHO + HO <sub>2</sub> + NO <sub>2</sub>                                                                                                                                       | KR02N0*(1.-alpha_AN(5,2,0,0,0, temp, cair))          | Sander et al. (2019)                          |
| G44101b | TrGCN  | LBUT1ENO2 + NO → LBUT1ENNO3                                                                                                                                                                                                         | KR02N0*alpha_AN(5,2,0,0,0,temp, cair)                | Sander et al. (2019)                          |
| G44102  | TrGCN  | LBUT1ENO2 + NO <sub>3</sub> → C <sub>2</sub> H <sub>5</sub> CHO + HCHO + HO <sub>2</sub> + NO <sub>2</sub>                                                                                                                          | KR02N03                                              | Sander et al. (2019)                          |
| G44103a | TrGC   | LBUT1ENOOH + OH → LBUT1ENO2                                                                                                                                                                                                         | k_R00HRO                                             | Sander et al. (2019)                          |
| G44103b | TrGC   | LBUT1ENOOH + OH → C <sub>2</sub> H <sub>5</sub> CO <sub>3</sub> + HCHO + HO <sub>2</sub>                                                                                                                                            | k_t*f_t00H*f_pCH20H                                  | Sander et al. (2019)*                         |
| G44104  | TrGCN  | LBUT1ENNO3 + OH → C <sub>2</sub> H <sub>5</sub> CHO + CO + HO <sub>2</sub> + NO <sub>2</sub>                                                                                                                                        | k_s*f_sOH*f_CH20N02                                  | Sander et al. (2019)*                         |
| G44105  | TrGC   | CBUT2ENE + OH → BUT2OLO2                                                                                                                                                                                                            | 1.1E-11*EXP(485./temp)                               | Atkinson et al. (2006)                        |
| G44106  | TrGC   | CBUT2ENE + O <sub>3</sub> → CH <sub>3</sub> CHO + .16 CH <sub>3</sub> CHOHOOH + .50 OH + .50 HCOCH <sub>2</sub> O <sub>2</sub> + .05 CH <sub>2</sub> CO + .09 CH <sub>3</sub> OH + .09 CO + .2 CH <sub>4</sub> + .2 CO <sub>2</sub> | 3.2E-15*EXP(-965./temp)                              | Atkinson et al. (2006), Sander et al. (2019)* |
| G44107  | TrGCN  | CBUT2ENE + NO <sub>3</sub> → 2 CH <sub>3</sub> CHO + NO <sub>2</sub>                                                                                                                                                                | 3.5E-13                                              | Atkinson et al. (2006), Sander et al. (2019)* |
| G44108  | TrGC   | TBUT2ENE + OH → BUT2OLO2                                                                                                                                                                                                            | 1.0E-11*EXP(553./temp)                               | Atkinson et al. (2006)                        |
| G44109  | TrGC   | TBUT2ENE + O <sub>3</sub> → CH <sub>3</sub> CHO + .16 CH <sub>3</sub> CHOHOOH + .50 OH + .50 HCOCH <sub>2</sub> O <sub>2</sub> + .05 CH <sub>2</sub> CO + .09 CH <sub>3</sub> OH + .09 CO + .2 CH <sub>4</sub> + .2 CO <sub>2</sub> | 6.6E-15*EXP(-1060./temp)                             | Atkinson et al. (2006), Sander et al. (2019)  |
| G44110  | TrGCN  | TBUT2ENE + NO <sub>3</sub> → 2 CH <sub>3</sub> CHO + NO <sub>2</sub>                                                                                                                                                                | 1.78E-12*EXP(-530./temp)<br>+1.28E-14*EXP(570./temp) | Atkinson et al. (2006), Sander et al. (2019)* |
| G44111  | TrGC   | BUT2OLO2 → C <sub>2</sub> H <sub>5</sub> CHO + HCHO + HO <sub>2</sub>                                                                                                                                                               | k1_R02sOR02                                          | Sander et al. (2019)                          |
| G44112a | TrGC   | BUT2OLO2 + HO <sub>2</sub> → BUT2OLOOH                                                                                                                                                                                              | k_R02_H02(temp,4)*r_COCH202_00H                      | Sander et al. (2019)                          |
| G44112b | TrGC   | BUT2OLO2 + HO <sub>2</sub> → 2 CH <sub>3</sub> CHO + HO <sub>2</sub> + OH                                                                                                                                                           | k_R02_H02(temp,4)*r_COCH202_0H                       | Sander et al. (2019)                          |

Table 1: Gas phase reactions (... continued)

| #       | labels | reaction                                                                                                | rate coefficient                                                             | reference                               |
|---------|--------|---------------------------------------------------------------------------------------------------------|------------------------------------------------------------------------------|-----------------------------------------|
| G44113a | TrGCN  | $\text{BUT2OLO2} + \text{NO} \rightarrow 2 \text{CH}_3\text{CHO} + \text{HO}_2 + \text{NO}_2$           | $\text{KRO2NO}*(1.-\alpha_{\text{AN}}(5,2,0,0,0, \text{temp}, \text{cair}))$ | Sander et al. (2019)                    |
| G44113b | TrGCN  | $\text{BUT2OLO2} + \text{NO} \rightarrow \text{BUT2OLNO3}$                                              | $\text{KRO2NO}*\alpha_{\text{AN}}(5,2,0,0,0, \text{temp}, \text{cair})$      | Sander et al. (2019)                    |
| G44114  | TrGCN  | $\text{BUT2OLO2} + \text{NO}_3 \rightarrow 2 \text{CH}_3\text{CHO} + \text{HO}_2 + \text{NO}_2$         | KRO2NO3                                                                      | Sander et al. (2019)                    |
| G44115a | TrGC   | $\text{BUT2OLOOH} + \text{OH} \rightarrow \text{BUT2OLO2}$                                              | k_R00HRO                                                                     | Sander et al. (2019)                    |
| G44115b | TrGC   | $\text{BUT2OLOOH} + \text{OH} \rightarrow \text{LMEKOOH} + \text{HO}_2$                                 | k_t*f_tOH*f_pCH2OH                                                           | Sander et al. (2019)                    |
| G44115c | TrGC   | $\text{BUT2OLOOH} + \text{OH} \rightarrow \text{BUT2OLO} + \text{OH}$                                   | k_t*f_tOOH*f_pCH2OH                                                          | Sander et al. (2019)                    |
| G44116  | TrGCN  | $\text{BUT2OLNO3} + \text{OH} \rightarrow \text{LMEKNO3} + \text{HO}_2$                                 | k_t*f_tOH*f_CH2ON02                                                          | Sander et al. (2019)                    |
| G44117  | TrGC   | $\text{BUT2OLO} + \text{OH} \rightarrow \text{BIACET} + \text{HO}_2$                                    | k_t*f_tOH*f_CO                                                               | Sander et al. (2019)                    |
| G44118  | TrGC   | $\text{IPRCHO} + \text{OH} \rightarrow \text{IPRCO3} + \text{H}_2\text{O}$                              | $6.8\text{E}-12*\text{EXP}(410./\text{temp})$                                | Atkinson et al. (2006)                  |
| G44119  | TrGCN  | $\text{IPRCHO} + \text{NO}_3 \rightarrow \text{IPRCO3} + \text{HNO}_3$                                  | $1.67\text{E}-12*\text{EXP}(-1460./\text{temp})$                             | Atkinson et al. (2006)                  |
| G44120  | TrGC   | $\text{IPRCO3} \rightarrow \text{iC}_3\text{H}_7\text{O}_2 + \text{CO}_2$                               | k1_R02RCO3                                                                   | Rickard (2022)                          |
| G44121a | TrGC   | $\text{IPRCO3} + \text{HO}_2 \rightarrow \text{PERIBUACID}$                                             | KAPH02*r_C03_OOH                                                             | Rickard (2022), Sander et al. (2019)    |
| G44121b | TrGC   | $\text{IPRCO3} + \text{HO}_2 \rightarrow \text{iC}_3\text{H}_7\text{O}_2 + \text{CO}_2 + \text{OH}$     | KAPH02*(1.-r_C03_OOH)                                                        | Rickard (2022), Sander et al. (2019)    |
| G44122  | TrGCN  | $\text{IPRCO3} + \text{NO}_2 \rightarrow \text{PIPn}$                                                   | k_CH3CO3_N02                                                                 | Rickard (2022)                          |
| G44123  | TrGCN  | $\text{IPRCO3} + \text{NO} \rightarrow \text{iC}_3\text{H}_7\text{O}_2 + \text{CO}_2 + \text{NO}_2$     | KAPNO                                                                        | Rickard (2022)                          |
| G44124a | TrGC   | $\text{PERIBUACID} + \text{OH} \rightarrow \text{IPRCO3} + \text{H}_2\text{O}$                          | k_R00HRO                                                                     | Rickard (2022)                          |
| G44124b | TrGC   | $\text{PERIBUACID} + \text{OH} \rightarrow \text{CH}_3\text{COCH}_3 + \text{H}_2\text{O} + \text{CO}_2$ | k_s*f_CO2H                                                                   | Sander et al. (2019)*                   |
| G44125  | TrGCN  | $\text{PIPn} \rightarrow \text{IPRCO3} + \text{NO}_2$                                                   | k_PAN_M                                                                      | Rickard (2022)                          |
| G44126  | TrGCN  | $\text{PIPn} + \text{OH} \rightarrow \text{CH}_3\text{COCH}_3 + \text{CO}_2 + \text{NO}_2$              | k_s*f_cpan                                                                   | Sander et al. (2019)*                   |
| G44127  | TrGC   | $\text{MPROPENOL} + \text{OH} \rightarrow \text{HCOOH} + \text{OH} + \text{CH}_3\text{COCH}_3$          | k_CH2CHOH_OH_HCOOH                                                           | Sander et al. (2019), So et al. (2014)* |
| G44128  | TrGC   | $\text{MPROPENOL} + \text{HCOOH} \rightarrow \text{IPRCHO} + \text{HCOOH}$                              | k_CH2CHOH_HCOOH                                                              | Sander et al. (2019), da Silva (2010)*  |
| G44129  | TrGC   | $\text{IPRCHO} + \text{HCOOH} \rightarrow \text{MPROPENOL} + \text{HCOOH}$                              | k_ALD_HCOOH                                                                  | Sander et al. (2019), da Silva (2010)*  |
| G44130  | TrGC   | $\text{BUTENOL} + \text{OH} \rightarrow \text{HCOOH} + \text{OH} + \text{C}_2\text{H}_5\text{CHO}$      | k_CH2CHOH_OH_HCOOH                                                           | Sander et al. (2019), So et al. (2014)* |
| G44131  | TrGC   | $\text{BUTENOL} + \text{HCOOH} \rightarrow \text{C}_3\text{H}_7\text{CHO} + \text{HCOOH}$               | k_CH2CHOH_HCOOH                                                              | Sander et al. (2019), da Silva (2010)*  |
| G44132  | TrGC   | $\text{C}_3\text{H}_7\text{CHO} + \text{HCOOH} \rightarrow \text{BUTENOL} + \text{HCOOH}$               | k_ALD_HCOOH                                                                  | Sander et al. (2019), da Silva (2010)*  |



Table 1: Gas phase reactions (... continued)

| #       | labels   | reaction                                                                                                                                                 | rate coefficient                 | reference                                                        |
|---------|----------|----------------------------------------------------------------------------------------------------------------------------------------------------------|----------------------------------|------------------------------------------------------------------|
| G44133  | TrGC     | HVMK + OH $\rightarrow$ HCOOH + OH + MGLYOX                                                                                                              | 8.8E-11                          | Sander et al. (2019), So et al. (2014), Messaadia et al. (2015)* |
| G44134  | TrGC     | HVMK + HCOOH $\rightarrow$ CO <sub>2</sub> C <sub>3</sub> CHO + HCOOH                                                                                    | k_CH2CHOH_HCOOH                  | Sander et al. (2019), da Silva (2010)*                           |
| G44135  | TrGC     | CO <sub>2</sub> C <sub>3</sub> CHO + HCOOH $\rightarrow$ HVMK + HCOOH                                                                                    | k_ALD_HCOOH                      | Sander et al. (2019), da Silva (2010)*                           |
| G44136  | TrGC     | HMAC + OH $\rightarrow$ HCOOH + OH + MGLYOX                                                                                                              | 8.8E-11                          | Sander et al. (2019), So et al. (2014), Messaadia et al. (2015)* |
| G44137  | TrGC     | HMAC + HCOOH $\rightarrow$ IBUTDIAL + HCOOH                                                                                                              | k_CH2CHOH_HCOOH                  | Sander et al. (2019), da Silva (2010)*                           |
| G44138  | TrGC     | IBUTDIAL + HCOOH $\rightarrow$ HMAC + HCOOH                                                                                                              | k_ALD_HCOOH                      | Sander et al. (2019), da Silva (2010)*                           |
| G44139  | TrGC     | CO <sub>2</sub> C <sub>3</sub> CHO + OH $\rightarrow$ CH <sub>3</sub> COCH <sub>2</sub> O <sub>2</sub> + CO <sub>2</sub> + H <sub>2</sub> O              | k_t*f_0*f_alk+k_s*f_CHO*f_CO     | Sander et al. (2019)*                                            |
| G44140  | TrGCN    | CO <sub>2</sub> C <sub>3</sub> CHO + NO <sub>3</sub> $\rightarrow$ CH <sub>3</sub> COCH <sub>2</sub> O <sub>2</sub> + CO <sub>2</sub> + HNO <sub>3</sub> | KN03AL*4.0                       | Sander et al. (2019)*                                            |
| G44141  | TrGC     | IBUTDIAL + OH $\rightarrow$ CH <sub>3</sub> CHO + CO + HO <sub>2</sub> + CO <sub>2</sub> + H <sub>2</sub> O                                              | 2.*k_t*f_0*f_alk+k_t*f_CHO*f_CHO | Sander et al. (2019)*                                            |
| G44142  | TrGCN    | IBUTDIAL + NO <sub>3</sub> $\rightarrow$ CH <sub>3</sub> CHO + CO + HO <sub>2</sub> + CO <sub>2</sub> + HNO <sub>3</sub>                                 | 2.*KN03AL*4.0                    | Sander et al. (2019)*                                            |
| G44200  | TrGTerC  | CH <sub>3</sub> COCOCH <sub>2</sub> O <sub>2</sub> $\rightarrow$ CH <sub>3</sub> C(O) + HCHO + CO                                                        | k1_R02pOR02                      | Rickard (2022)                                                   |
| G44201  | TrGTerC  | CH <sub>3</sub> COCOCH <sub>2</sub> O <sub>2</sub> + HO <sub>2</sub> $\rightarrow$ CH <sub>3</sub> COCOCH <sub>2</sub> OOH                               | k_R02_H02(temp,4)                | Rickard (2022)                                                   |
| G44202  | TrGTerCN | CH <sub>3</sub> COCOCH <sub>2</sub> O <sub>2</sub> + NO $\rightarrow$ CH <sub>3</sub> C(O) + HCHO + CO + NO <sub>2</sub>                                 | KR02NO                           | Rickard (2022)*                                                  |
| G44203a | TrGTerC  | CH <sub>3</sub> COCOCH <sub>2</sub> OOH + OH $\rightarrow$ CH <sub>3</sub> COCOCHO + OH                                                                  | k_s*f_CO*f_s00H                  | Rickard (2022)*                                                  |
| G44203b | TrGTerC  | CH <sub>3</sub> COCOCH <sub>2</sub> OOH + OH $\rightarrow$ CH <sub>3</sub> COCOCH <sub>2</sub> O <sub>2</sub>                                            | k_R00HR0                         | Rickard (2022)                                                   |
| G44204  | TrGTerC  | C44O <sub>2</sub> + HO <sub>2</sub> $\rightarrow$ C44OOH                                                                                                 | k_R02_H02(temp,4)                | Rickard (2022)                                                   |
| G44205  | TrGTerCN | C44O <sub>2</sub> + NO $\rightarrow$ HCOCH <sub>2</sub> CHO + CO <sub>2</sub> + HO <sub>2</sub> + NO <sub>2</sub>                                        | KR02NO                           | Rickard (2022)*                                                  |
| G44206  | TrGTerC  | C44O <sub>2</sub> $\rightarrow$ HCOCH <sub>2</sub> CHO + CO <sub>2</sub> + HO <sub>2</sub>                                                               | k1_R02sOR02                      | Rickard (2022)                                                   |
| G44207  | TrGTerC  | C44OOH + OH $\rightarrow$ C44O <sub>2</sub>                                                                                                              | 7.46E-11                         | Rickard (2022)                                                   |
| G44208  | TrGTerC  | CHOC <sub>3</sub> COO <sub>2</sub> $\rightarrow$ HCOCH <sub>2</sub> CO <sub>3</sub> + HCHO                                                               | k1_R02pOR02                      | Rickard (2022)                                                   |
| G44209  | TrGTerC  | CHOC <sub>3</sub> COO <sub>2</sub> + HO <sub>2</sub> $\rightarrow$ C413COOOH                                                                             | k_R02_H02(temp,4)                | Rickard (2022)                                                   |
| G44210  | TrGTerCN | CHOC <sub>3</sub> COO <sub>2</sub> + NO $\rightarrow$ HCOCH <sub>2</sub> CO <sub>3</sub> + HCHO + NO <sub>2</sub>                                        | KR02NO                           | Rickard (2022)*                                                  |
| G44211  | TrGTerC  | C413COOOH + OH $\rightarrow$ CHOC <sub>3</sub> COO <sub>2</sub>                                                                                          | 8.33E-11                         | Rickard (2022)                                                   |
| G44212  | TrGTerC  | C4CODIAL + OH $\rightarrow$ C312COCO <sub>3</sub>                                                                                                        | 3.39E-11                         | Rickard (2022)                                                   |
| G44213  | TrGTerCN | C4CODIAL + NO <sub>3</sub> $\rightarrow$ C312COCO <sub>3</sub> + HNO <sub>3</sub>                                                                        | 2.*KN03AL*4.0                    | Rickard (2022)                                                   |
| G44214  | TrGTerC  | C312COCO <sub>3</sub> $\rightarrow$ HCOCOCH <sub>2</sub> O <sub>2</sub> + CO <sub>2</sub>                                                                | k1_R02RCO3                       | Rickard (2022)                                                   |

Table 1: Gas phase reactions (... continued)

| #       | labels   | reaction                                                                                                             | rate coefficient                                        | reference                            |
|---------|----------|----------------------------------------------------------------------------------------------------------------------|---------------------------------------------------------|--------------------------------------|
| G44215a | TrGTerC  | $\text{C312COCO3} + \text{HO}_2 \rightarrow \text{C312COCO3H}$                                                       | $\text{KAPH02*r\_C03\_00H}$                             | Rickard (2022)                       |
| G44215b | TrGTerC  | $\text{C312COCO3} + \text{HO}_2 \rightarrow \text{HCOCOCH}_2\text{O}_2 + \text{CO}_2 + \text{OH}$                    | $\text{KAPH02*(1.-r\_C03\_00H)}$                        | Rickard (2022)                       |
| G44216  | TrGTerCN | $\text{C312COCO3} + \text{NO}_2 \rightarrow \text{C312COPAN}$                                                        | $\text{k\_CH3C03\_N02}$                                 | Rickard (2022)                       |
| G44217  | TrGTerCN | $\text{C312COCO3} + \text{NO} \rightarrow \text{HCOCOCH}_2\text{O}_2 + \text{CO}_2 + \text{NO}_2$                    | KAPNO                                                   | Rickard (2022)                       |
| G44218  | TrGTerC  | $\text{C312COCO3H} + \text{OH} \rightarrow \text{C312COCO3}$                                                         | $1.63\text{E-}11$                                       | Rickard (2022)                       |
| G44219  | TrGTerCN | $\text{C312COPAN} \rightarrow \text{C312COCO3} + \text{NO}_2$                                                        | $\text{k\_PAN\_M}$                                      | Rickard (2022)                       |
| G44220  | TrGTerCN | $\text{C312COPAN} + \text{OH} \rightarrow \text{HCOCOCHO} + \text{CO} + \text{NO}_2$                                 | $1.27\text{E-}11$                                       | Rickard (2022)                       |
| G44221  | TrGTerC  | $\text{CH}_3\text{COCOCHO} + \text{OH} \rightarrow \text{CH}_3\text{C(O)} + 2 \text{CO}$                             | $8.4\text{E-}13*\text{EXP}(830./\text{temp})$           | Sander et al. (2019)*                |
| G44222  | TrGTerCN | $\text{CH}_3\text{COCOCHO} + \text{NO}_3 \rightarrow \text{CH}_3\text{C(O)} + 2 \text{CO} + \text{HNO}_3$            | $\text{KN03AL*4.0}$                                     | Rickard (2022)                       |
| G44223  | TrGTerC  | $\text{IBUTALOH} + \text{OH} \rightarrow \text{IPRHOCO3}$                                                            | $1.4\text{E-}11$                                        | Rickard (2022)                       |
| G44224a | TrGTerC  | $\text{IPRHOCO3} + \text{HO}_2 \rightarrow \text{CH}_3\text{COCH}_3 + \text{CO}_2 + \text{HO}_2 + \text{OH}$         | $\text{KAPH02*r\_C03\_OH}$                              | Rickard (2022), Sander et al. (2019) |
| G44224b | TrGTerC  | $\text{IPRHOCO3} + \text{HO}_2 \rightarrow \text{IPRHOCO2H} + \text{O}_3$                                            | $\text{KAPH02*r\_C03\_O3}$                              | Rickard (2022), Sander et al. (2019) |
| G44224c | TrGTerC  | $\text{IPRHOCO3} + \text{HO}_2 \rightarrow \text{IPRHOCO3H}$                                                         | $\text{KAPH02*r\_C03\_00H}$                             | Rickard (2022), Sander et al. (2019) |
| G44225  | TrGTerCN | $\text{IPRHOCO3} + \text{NO} \rightarrow \text{CH}_3\text{COCH}_3 + \text{CO}_2 + \text{HO}_2 + \text{NO}_2$         | KAPNO                                                   | Rickard (2022)                       |
| G44226  | TrGTerCN | $\text{IPRHOCO3} + \text{NO}_2 \rightarrow \text{C4PAN5}$                                                            | $\text{k\_CH3C03\_N02}$                                 | Rickard (2022)                       |
| G44227  | TrGTerCN | $\text{IPRHOCO3} + \text{NO}_3 \rightarrow \text{CH}_3\text{COCH}_3 + \text{CO}_2 + \text{HO}_2 + \text{NO}_2$       | $\text{KR02N03*1.74}$                                   | Rickard (2022)                       |
| G44228a | TrGTerC  | $\text{IPRHOCO3} \rightarrow \text{CH}_3\text{COCH}_3 + \text{CO}_2 + \text{HO}_2$                                   | $\text{k1\_R02RC03*0.7}$                                | Rickard (2022)                       |
| G44228b | TrGTerC  | $\text{IPRHOCO3} \rightarrow \text{IPRHOCO2H}$                                                                       | $\text{k1\_R02RC03*0.3}$                                | Rickard (2022)                       |
| G44229  | TrGTerC  | $\text{IPRHOCO2H} + \text{OH} \rightarrow \text{CH}_3\text{COCH}_3 + \text{CO}_2 + \text{HO}_2 + \text{H}_2\text{O}$ | $1.72\text{E-}12$                                       | Rickard (2022)                       |
| G44230  | TrGTerC  | $\text{OH} + \text{IPRHOCO3H} \rightarrow \text{IPRHOCO3}$                                                           | $4.80\text{E-}12$                                       | Rickard (2022)                       |
| G44231  | TrGTerCN | $\text{C4PAN5} \rightarrow \text{IPRHOCO3} + \text{NO}_2$                                                            | $\text{k\_PAN\_M}$                                      | Rickard (2022)                       |
| G44232  | TrGTerCN | $\text{C4PAN5} + \text{OH} \rightarrow \text{CH}_3\text{COCH}_3 + \text{CO} + \text{NO}_2$                           | $4.75\text{E-}13$                                       | Rickard (2022)                       |
| G44233a | TrGTerC  | $\text{MBOOO} \rightarrow \text{IPRHOCO2H}$                                                                          | $1.60\text{E-}17*\text{C}(\text{ind\_H20})*(0.08+0.15)$ | Rickard (2022), Sander et al. (2019) |
| G44233b | TrGTerC  | $\text{MBOOO} \rightarrow \text{IBUTALOH} + \text{H}_2\text{O}_2$                                                    | $1.60\text{E-}17*\text{C}(\text{ind\_H20})*0.77$        | Rickard (2022), Sander et al. (2019) |
| G44234  | TrGTerC  | $\text{MBOOO} + \text{CO} \rightarrow \text{IBUTALOH} + \text{CO}_2$                                                 | $1.20\text{E-}15$                                       | Rickard (2022)                       |
| G44235  | TrGTerCN | $\text{MBOOO} + \text{NO} \rightarrow \text{IBUTALOH} + \text{NO}_2$                                                 | $1.00\text{E-}14$                                       | Rickard (2022)                       |
| G44236  | TrGTerCN | $\text{MBOOO} + \text{NO}_2 \rightarrow \text{IBUTALOH} + \text{NO}_3$                                               | $1.00\text{E-}15$                                       | Rickard (2022)                       |
| G44400  | TrGAroC  | $\text{MALANHY} + \text{OH} \rightarrow \text{MALANHYO2}$                                                            | $1.4\text{E-}12$                                        | Rickard (2022)                       |
| G44401a | TrGAroC  | $\text{MALDIALOOH} + \text{OH} \rightarrow \text{HOCOC4DIAL} + \text{OH}$                                            | $1.22\text{E-}10$                                       | Rickard (2022)                       |
| G44401b | TrGAroC  | $\text{MALDIALOOH} + \text{OH} \rightarrow \text{MALDIALO2}$                                                         | $\text{k\_ROOHR0}$                                      | Rickard (2022)                       |

Table 1: Gas phase reactions (... continued)

| #       | labels   | reaction                                                                                                                                                                                           | rate coefficient | reference       |
|---------|----------|----------------------------------------------------------------------------------------------------------------------------------------------------------------------------------------------------|------------------|-----------------|
| G44402  | TrGAroCN | NC4DCO2H + OH $\rightarrow$ MALANHY + NO <sub>2</sub>                                                                                                                                              | k_R00HRO         | Rickard (2022)* |
| G44403  | TrGAroC  | CO14O3CO2H + OH $\rightarrow$ HCOCH <sub>2</sub> O <sub>2</sub> + 2 CO <sub>2</sub>                                                                                                                | 2.19E-11         | Rickard (2022)  |
| G44404  | TrGAroC  | BZFUOOH + OH $\rightarrow$ BZFUO2                                                                                                                                                                  | 3.68E-11         | Rickard (2022)  |
| G44405  | TrGAroC  | HOCOC4DIAL + OH $\rightarrow$ CO2C4DIAL + HO <sub>2</sub>                                                                                                                                          | 3.67E-11         | Rickard (2022)  |
| G44406a | TrGAroC  | MALDIALCO3 + HO <sub>2</sub> $\rightarrow$ MALDALCO2H + O <sub>3</sub>                                                                                                                             | KAPH02*r_C03_03  | Rickard (2022)  |
| G44406b | TrGAroC  | MALDIALCO3 + HO <sub>2</sub> $\rightarrow$ MALDALCO3H                                                                                                                                              | KAPH02*r_C03_00H | Rickard (2022)  |
| G44406c | TrGAroC  | MALDIALCO3 + HO <sub>2</sub> $\rightarrow$ .6 MALANHY + HO <sub>2</sub> + .4 GLYOX + .4 CO + .4 CO <sub>2</sub> + OH                                                                               | KAPH02*r_C03_0H  | Rickard (2022)* |
| G44407  | TrGAroCN | MALDIALCO3 + NO $\rightarrow$ .6 MALANHY + HO <sub>2</sub> + .4 GLYOX + .4 CO + .4 CO <sub>2</sub> + NO <sub>2</sub>                                                                               | KAPNO            | Rickard (2022)* |
| G44408  | TrGAroCN | MALDIALCO3 + NO <sub>2</sub> $\rightarrow$ MALDIALPAN                                                                                                                                              | k_CH3C03_N02     | Rickard (2022)  |
| G44409  | TrGAroCN | MALDIALCO3 + NO <sub>3</sub> $\rightarrow$ .6 MALANHY + HO <sub>2</sub> + .4 GLYOX + .4 CO + .4 CO <sub>2</sub> + NO <sub>2</sub>                                                                  | KR02N03*1.74     | Rickard (2022)* |
| G44410  | TrGAroC  | MALDIALCO3 $\rightarrow$ .6 MALANHY + HO <sub>2</sub> + .4 GLYOX + .4 CO + .4 CO <sub>2</sub>                                                                                                      | k1_R02RC03       | Rickard (2022)* |
| G44411  | TrGAroCN | BZFUONE + NO <sub>3</sub> $\rightarrow$ NBZFUO2                                                                                                                                                    | 3.00E-13         | Rickard (2022)  |
| G44412  | TrGAroC  | BZFUONE + O <sub>3</sub> $\rightarrow$ .3125 CO14O3CO2H + .1875 CO14O3CHO + .1875 H <sub>2</sub> O <sub>2</sub> + .5 CO + .5 CO <sub>2</sub> + .5 HCOCH <sub>2</sub> O <sub>2</sub> + .5 OH        | 2.20E-19         | see note*       |
| G44413  | TrGAroC  | BZFUONE + OH $\rightarrow$ BZFUO2                                                                                                                                                                  | 4.45E-11         | Rickard (2022)  |
| G44414  | TrGAroCN | NBZFUOOH + OH $\rightarrow$ NBZFUO2                                                                                                                                                                | 6.18E-12         | Rickard (2022)  |
| G44415  | TrGAroC  | MALDALCO3H + OH $\rightarrow$ MALDIALCO3                                                                                                                                                           | 4.00E-11         | Rickard (2022)  |
| G44416  | TrGAroC  | EPXDLCO2H + OH $\rightarrow$ C3DIALO2 + CO <sub>2</sub>                                                                                                                                            | 2.31E-11         | Rickard (2022)  |
| G44417a | TrGAroC  | EPXDLCO3 + HO <sub>2</sub> $\rightarrow$ C3DIALO2 + CO <sub>2</sub> + OH                                                                                                                           | KAPH02*r_C03_0H  | Rickard (2022)  |
| G44417b | TrGAroC  | EPXDLCO3 + HO <sub>2</sub> $\rightarrow$ EPXDLCO2H + O <sub>3</sub>                                                                                                                                | KAPH02*r_C03_03  | Rickard (2022)  |
| G44417c | TrGAroC  | EPXDLCO3 + HO <sub>2</sub> $\rightarrow$ EPXDLCO3H                                                                                                                                                 | KAPH02*r_C03_00H | Rickard (2022)  |
| G44418  | TrGAroCN | EPXDLCO3 + NO $\rightarrow$ C3DIALO2 + CO <sub>2</sub> + NO <sub>2</sub>                                                                                                                           | KAPNO            | Rickard (2022)  |
| G44419  | TrGAroCN | EPXDLCO3 + NO <sub>2</sub> $\rightarrow$ EPXDLPAN                                                                                                                                                  | k_CH3C03_N02     | Rickard (2022)  |
| G44420  | TrGAroCN | EPXDLCO3 + NO <sub>3</sub> $\rightarrow$ C3DIALO2 + CO <sub>2</sub> + NO <sub>2</sub>                                                                                                              | KR02N03*1.74     | Rickard (2022)  |
| G44421  | TrGAroC  | EPXDLCO3 $\rightarrow$ C3DIALO2 + CO <sub>2</sub>                                                                                                                                                  | k1_R02RC03       | Rickard (2022)* |
| G44422  | TrGAroC  | MALNHYOHCO + OH $\rightarrow$ CO + CO + CO + CO <sub>2</sub> + HO <sub>2</sub>                                                                                                                     | 5.68E-12         | Rickard (2022)  |
| G44423  | TrGAroCN | MALDIAL + NO <sub>3</sub> $\rightarrow$ MALDIALCO3 + HNO <sub>3</sub>                                                                                                                              | 2.*KN03AL*2.0    | Rickard (2022)  |
| G44424  | TrGAroC  | MALDIAL + O <sub>3</sub> $\rightarrow$ 1.0675 GLYOX + .125 HCHO + .1125 HCOCO <sub>2</sub> H + .0675 H <sub>2</sub> O <sub>2</sub> + .82 HO <sub>2</sub> + .57 OH + 1.265 CO + .25 CO <sub>2</sub> | 2.00E-18         | Rickard (2022)* |

Table 1: Gas phase reactions (... continued)

| #       | labels   | reaction                                                                                                                       | rate coefficient                                  | reference                            |
|---------|----------|--------------------------------------------------------------------------------------------------------------------------------|---------------------------------------------------|--------------------------------------|
| G44425  | TrGAroC  | MALDIAL + OH $\rightarrow$ .83 MALDIALCO3 + .17 MALDIALO2                                                                      | 5.20E-11                                          | Rickard (2022)*                      |
| G44426  | TrGAroC  | MALANHYOOH + OH $\rightarrow$ MALNHYOHCO + OH                                                                                  | 4.66E-11                                          | Rickard (2022)                       |
| G44427  | TrGAroCN | MALDIALPAN + OH $\rightarrow$ GLYOX + CO + CO + NO <sub>2</sub>                                                                | 3.70E-11                                          | Rickard (2022)                       |
| G44428  | TrGAroCN | MALDIALPAN $\rightarrow$ MALDIALCO3 + NO <sub>2</sub>                                                                          | k_PAN_M                                           | Rickard (2022)                       |
| G44429a | TrGAroC  | MALANHYO2 + HO <sub>2</sub> $\rightarrow$ MALANHYOOH                                                                           | k_R02_H02(temp,4)*(1.-r_COCH202_OH-r_CHOCH202_OH) | Rickard (2022), Sander et al. (2019) |
| G44429b | TrGAroC  | MALANHYO2 + HO <sub>2</sub> $\rightarrow$ HCOCOHC03 + CO <sub>2</sub> + OH                                                     | k_R02_H02(temp,4)*(r_COCH202_OH+r_CHOCH202_OH)    | Rickard (2022), Sander et al. (2019) |
| G44430  | TrGAroCN | MALANHYO2 + NO $\rightarrow$ HCOCOHC03 + CO <sub>2</sub> + NO <sub>2</sub>                                                     | KR02N0                                            | Rickard (2022)*                      |
| G44431  | TrGAroCN | MALANHYO2 + NO <sub>3</sub> $\rightarrow$ HCOCOHC03 + CO <sub>2</sub> + NO <sub>2</sub>                                        | KR02N03                                           | Rickard (2022)*                      |
| G44432  | TrGAroC  | MALANHYO2 $\rightarrow$ HCOCOHC03 + CO <sub>2</sub>                                                                            | k1_R02s0R02                                       | Rickard (2022)*                      |
| G44433  | TrGAroC  | EPXDLC03H + OH $\rightarrow$ EPXDLC03                                                                                          | 2.62E-11                                          | Rickard (2022)                       |
| G44434  | TrGAroC  | CO2C4DIAL + OH $\rightarrow$ CO + CO + CO + CO + HO <sub>2</sub>                                                               | 2.45E-11                                          | Rickard (2022)                       |
| G44435a | TrGAroCN | NBZFUO2 + HO <sub>2</sub> $\rightarrow$ NBZFUOOH                                                                               | k_R02_H02(temp,4)*(1.-r_COCH202_OH)               | Rickard (2022), Sander et al. (2019) |
| G44435b | TrGAroCN | NBZFUO2 + HO <sub>2</sub> $\rightarrow$ .5 CO14O3CHO + .5 NO <sub>2</sub> + .5 NBZFUONE + .5 HO <sub>2</sub> + OH              | k_R02_H02(temp,4)*r_COCH202_OH                    | Rickard (2022), Sander et al. (2019) |
| G44436  | TrGAroCN | NBZFUO2 + NO $\rightarrow$ .5 CO14O3CHO + .5 NO <sub>2</sub> + .5 NBZFUONE + .5 HO <sub>2</sub> + NO <sub>2</sub>              | KR02N0                                            | Rickard (2022)*                      |
| G44437  | TrGAroCN | NBZFUO2 + NO <sub>3</sub> $\rightarrow$ .5 CO14O3CHO + .5 NO <sub>2</sub> + .5 NBZFUONE + .5 HO <sub>2</sub> + NO <sub>2</sub> | KR02N03                                           | Rickard (2022)*                      |
| G44438  | TrGAroCN | NBZFUO2 $\rightarrow$ .5 CO14O3CHO + .5 NO <sub>2</sub> + .5 NBZFUONE + .5 HO <sub>2</sub>                                     | k1_R02s0R02                                       | Rickard (2022)*                      |
| G44439  | TrGAroC  | MALDALCO2H + OH $\rightarrow$ .6 MALANHY + HO <sub>2</sub> + .4 GLYOX + .4 CO + .4 CO <sub>2</sub>                             | 3.70E-11                                          | Rickard (2022)*                      |
| G44440  | TrGAroCN | EPXC4DIAL + NO <sub>3</sub> $\rightarrow$ EPXDLC03 + HNO <sub>3</sub>                                                          | 2.*KN03AL*4.0                                     | Rickard (2022)                       |
| G44441  | TrGAroC  | EPXC4DIAL + OH $\rightarrow$ EPXDLC03                                                                                          | 4.32E-11                                          | Rickard (2022)                       |
| G44442a | TrGAroC  | MECOACETO2 + HO <sub>2</sub> $\rightarrow$ MECOACEOOH                                                                          | k_R02_H02(temp,4)*(1.-r_COCH202_OH)               | Rickard (2022), Sander et al. (2019) |
| G44442b | TrGAroC  | MECOACETO2 + HO <sub>2</sub> $\rightarrow$ CH <sub>3</sub> C(O)OO + HCHO + CO <sub>2</sub> + OH                                | k_R02_H02(temp,4)*r_COCH202_OH                    | Rickard (2022), Sander et al. (2019) |
| G44443  | TrGAroCN | MECOACETO2 + NO $\rightarrow$ CH <sub>3</sub> C(O)OO + HCHO + CO <sub>2</sub> + NO <sub>2</sub>                                | KR02N0                                            | Rickard (2022)*                      |

Table 1: Gas phase reactions (... continued)

| #       | labels   | reaction                                                                                                                                                                                                                                                                                                                                                                                                                 | rate coefficient                                  | reference                                    |
|---------|----------|--------------------------------------------------------------------------------------------------------------------------------------------------------------------------------------------------------------------------------------------------------------------------------------------------------------------------------------------------------------------------------------------------------------------------|---------------------------------------------------|----------------------------------------------|
| G44444  | TrGAroCN | MECOACETO2 + NO <sub>3</sub> → CH <sub>3</sub> C(O)OO + HCHO + CO <sub>2</sub> + NO <sub>2</sub>                                                                                                                                                                                                                                                                                                                         | KR02NO3                                           | Rickard (2022)*                              |
| G44445  | TrGAroC  | MECOACETO2 → CH <sub>3</sub> C(O)OO + HCHO + CO <sub>2</sub>                                                                                                                                                                                                                                                                                                                                                             | k1_R02pOR02                                       | Rickard (2022)*                              |
| G44446  | TrGAroCN | CO14O3CHO + NO <sub>3</sub> → CO + HCOCH <sub>2</sub> O <sub>2</sub> + CO <sub>2</sub> + HNO <sub>3</sub>                                                                                                                                                                                                                                                                                                                | KN03AL*8.0                                        | Rickard (2022)                               |
| G44447  | TrGAroC  | CO14O3CHO + OH → CO + HCOCH <sub>2</sub> O <sub>2</sub> + CO <sub>2</sub>                                                                                                                                                                                                                                                                                                                                                | 3.44E-11                                          | Rickard (2022)                               |
| G44448  | TrGAroCN | NBZFUONE + OH → BZFUCO + NO <sub>2</sub>                                                                                                                                                                                                                                                                                                                                                                                 | 1.16E-12                                          | Rickard (2022)                               |
| G44449a | TrGAroC  | BZFUO2 + HO <sub>2</sub> → BZFUOOH                                                                                                                                                                                                                                                                                                                                                                                       | k_R02_HO2(temp,4)*(1.-r_COCH2O2_OH-r_CHOCH2O2_OH) | Rickard (2022), Sander et al. (2019)         |
| G44449b | TrGAroC  | BZFUO2 + HO <sub>2</sub> → CO14O3CHO + HO <sub>2</sub> + OH                                                                                                                                                                                                                                                                                                                                                              | k_R02_HO2(temp,4)*(r_COCH2O2_OH+r_CHOCH2O2_OH)    | Rickard (2022), Sander et al. (2019)         |
| G44450  | TrGAroCN | BZFUO2 + NO → CO14O3CHO + HO <sub>2</sub> + NO <sub>2</sub>                                                                                                                                                                                                                                                                                                                                                              | KR02NO                                            | Rickard (2022)*                              |
| G44451  | TrGAroCN | BZFUO2 + NO <sub>3</sub> → CO14O3CHO + HO <sub>2</sub> + NO <sub>2</sub>                                                                                                                                                                                                                                                                                                                                                 | KR02NO3                                           | Rickard (2022)*                              |
| G44452  | TrGAroC  | BZFUO2 → CO14O3CHO + HO <sub>2</sub>                                                                                                                                                                                                                                                                                                                                                                                     | k1_R02sOR02                                       | Rickard (2022)*                              |
| G44453  | TrGAroC  | BZFUCO + OH → CO14O3CHO + HO <sub>2</sub>                                                                                                                                                                                                                                                                                                                                                                                | 1.78E-11                                          | Rickard (2022)                               |
| G44456a | TrGAroC  | MALDIALO2 + HO <sub>2</sub> → MALDIALOOH                                                                                                                                                                                                                                                                                                                                                                                 | k_R02_HO2(temp,4)*(1.-r_COCH2O2_OH-r_CHOCH2O2_OH) | Rickard (2022)                               |
| G44456b | TrGAroC  | MALDIALO2 + HO <sub>2</sub> → GLYOX + GLYOX + HO <sub>2</sub> + OH                                                                                                                                                                                                                                                                                                                                                       | k_R02_HO2(temp,4)*(r_COCH2O2_OH+r_CHOCH2O2_OH)    | Rickard (2022)                               |
| G44457  | TrGAroCN | MALDIALO2 + NO → GLYOX + GLYOX + HO <sub>2</sub> + NO <sub>2</sub>                                                                                                                                                                                                                                                                                                                                                       | KR02NO                                            | Rickard (2022)*                              |
| G44458  | TrGAroCN | MALDIALO2 + NO <sub>3</sub> → GLYOX + GLYOX + HO <sub>2</sub> + NO <sub>2</sub>                                                                                                                                                                                                                                                                                                                                          | KR02NO3                                           | Rickard (2022)*                              |
| G44459  | TrGAroC  | MALDIALO2 → GLYOX + GLYOX + HO <sub>2</sub>                                                                                                                                                                                                                                                                                                                                                                              | k1_R02sOR02                                       | Rickard (2022)*                              |
| G44460  | TrGAroCN | EPXDLPAN + OH → HCOCOCHO + CO + NO <sub>2</sub>                                                                                                                                                                                                                                                                                                                                                                          | 2.29E-11                                          | Rickard (2022)                               |
| G44461  | TrGAroCN | EPXDLPAN → EPXDLCO3 + NO <sub>2</sub>                                                                                                                                                                                                                                                                                                                                                                                    | k_PAN_M                                           | Rickard (2022)*                              |
| G44462  | TrGAroC  | MECOACEOOH + OH → MECOACETO2                                                                                                                                                                                                                                                                                                                                                                                             | 3.59E-12                                          | Rickard (2022)                               |
| G45000  | TrGC     | C <sub>5</sub> H <sub>8</sub> + O <sub>3</sub> → .3508 MACR + .01518 MACO2H + .2440 MVK + .7085 HCHO + .11 CH <sub>2</sub> OO + .1275 C <sub>3</sub> H <sub>6</sub> + .1575 CH <sub>3</sub> C(O) + .0510 CH <sub>3</sub> + .2625 HO <sub>2</sub> + .27 OH + .09482 H <sub>2</sub> O <sub>2</sub> + .255 CO <sub>2</sub> + .522 CO + .07182 HCHO + .03618 HCOCH <sub>2</sub> O <sub>2</sub> + .01782 CO + 0.05408 LCARBON | 1.03E-14*EXP(-1995./temp)                         | Atkinson et al. (2006), Sander et al. (2019) |
| G45001  | TrGC     | C <sub>5</sub> H <sub>8</sub> + OH → .63 LISOPAB + .30 LISOPCD + .07 LISOPEFO2                                                                                                                                                                                                                                                                                                                                           | 2.7E-11*EXP(390./temp)                            | Atkinson et al. (2006), Sander et al. (2019) |
| G45002  | TrGCN    | C <sub>5</sub> H <sub>8</sub> + NO <sub>3</sub> → NISOPO2                                                                                                                                                                                                                                                                                                                                                                | 3.0E-12*EXP(-450./temp)                           | Atkinson et al. (2006)                       |
| G45003a | TrGC     | LISOPAB + O <sub>2</sub> → LISOPACO2                                                                                                                                                                                                                                                                                                                                                                                     | 5.530E-13                                         | Sander et al. (2019)                         |

Table 1: Gas phase reactions (... continued)

| #       | labels | reaction                                                  | rate coefficient                                             | reference                                                           |
|---------|--------|-----------------------------------------------------------|--------------------------------------------------------------|---------------------------------------------------------------------|
| G45003b | TrGC   | LISOPAB + O <sub>2</sub> → ISOPBO2                        | 3.E-12                                                       | Sander et al. (2019)                                                |
| G45004a | TrGC   | LISOPCD + O <sub>2</sub> → LDISOPACO2                     | 6.780E-13                                                    | Sander et al. (2019)                                                |
| G45004b | TrGC   | LISOPCD + O <sub>2</sub> → ISOPDO2                        | 3.E-12                                                       | Sander et al. (2019)                                                |
| G45005  | TrGC   | LISOPACO2 → LISOPAB + O <sub>2</sub>                      | 3.1E12*exp(-7900./temp)*.6+<br>7.8E13*exp(-8600./temp)*.4    | Sander et al. (2019)                                                |
| G45006  | TrGC   | ISOPBO2 → LISOPAB + O <sub>2</sub>                        | 3.7E14*exp(-9570./temp)<br>+4.2E14*exp(-9970./temp)          | Sander et al. (2019)                                                |
| G45007  | TrGC   | LDISOPACO2 → LISOPCD + O <sub>2</sub>                     | 5.65E12*exp(-8410./temp)<br>*.42+1.4E14*exp(-9110./temp)*.58 | Sander et al. (2019)                                                |
| G45008  | TrGC   | ISOPDO2 → LISOPCD + O <sub>2</sub>                        | 5.0E14*exp(-10120./temp)<br>+8.25E14*exp(-10220./temp)       | Sander et al. (2019)                                                |
| G45009a | TrGC   | LISOPACO2 → C1ODC2O2C4OOH                                 | k_16hsz14 * 2./3.*(1.-f_HPAl)                                | Sander et al. (2019)                                                |
| G45009b | TrGC   | LISOPACO2 → LZCODC23DBCOOH + HO <sub>2</sub>              | k_16hsz14 * (2./3.*f_HPAl + 1./3.)                           | Sander et al. (2019)                                                |
| G45010a | TrGC   | LDISOPACO2 → C1OOHC3O2C4OD                                | k_16hsz41 * 2./3.*(1.-f_HPAl)                                | Sander et al. (2019)                                                |
| G45010b | TrGC   | LDISOPACO2 → LZCODC23DBCOOH + HO <sub>2</sub>             | k_16hsz41 * (2./3.*f_HPAl + 1./3.)                           | Sander et al. (2019)                                                |
| G45011  | TrGC   | LISOPACO2 → .9 LISOPACO + .1 ISOPAOh                      | k1_R02LISOPAC02                                              | Rickard (2022), Sander et al. (2019)                                |
| G45012  | TrGC   | LISOPACO2 + HO <sub>2</sub> → LISOPACOOH                  | k_R02_H02(temp,5)                                            | Rickard (2022)                                                      |
| G45013a | TrGCN  | LISOPACO2 + NO → LISOPACO + NO <sub>2</sub>               | KR02NO*(1.-alpha_AN(6,1,0,0,0,<br>temp,cair))                | Lockwood et al. (2010), Paulot et al. (2009a), Sander et al. (2019) |
| G45013b | TrGCN  | LISOPACO2 + NO → LISOPACNO3                               | KR02NO*alpha_AN(6,1,0,0,0,temp,<br>cair)                     | Lockwood et al. (2010), Paulot et al. (2009a), Sander et al. (2019) |
| G45014  | TrGCN  | LISOPACO2 + NO <sub>3</sub> → LISOPACO + NO <sub>2</sub>  | KR02NO3                                                      | Rickard (2022)                                                      |
| G45015  | TrGC   | LDISOPACO2 → .9 LISOPACO + .1 ISOPAOh                     | k1_R02LISOPAC02                                              | Rickard (2022), Sander et al. (2019)                                |
| G45016  | TrGC   | LDISOPACO2 + HO <sub>2</sub> → LISOPACOOH                 | k_R02_H02(temp,5)                                            | Rickard (2022)                                                      |
| G45017a | TrGCN  | LDISOPACO2 + NO → LISOPACO + NO <sub>2</sub>              | KR02NO*(1.-alpha_AN(6,1,0,0,0,<br>temp,cair))                | Lockwood et al. (2010), Paulot et al. (2009a), Sander et al. (2019) |
| G45017b | TrGCN  | LDISOPACO2 + NO → LISOPACNO3                              | KR02NO*alpha_AN(6,1,0,0,0,temp,<br>cair)                     | Lockwood et al. (2010), Paulot et al. (2009a), Sander et al. (2019) |
| G45018  | TrGCN  | LDISOPACO2 + NO <sub>3</sub> → LISOPACO + NO <sub>2</sub> | KR02NO3                                                      | Rickard (2022)                                                      |

Table 1: Gas phase reactions (... continued)

| #       | labels | reaction                                                                                                                                                                                                                                                                                                           | rate coefficient                                        | reference                                    |
|---------|--------|--------------------------------------------------------------------------------------------------------------------------------------------------------------------------------------------------------------------------------------------------------------------------------------------------------------------|---------------------------------------------------------|----------------------------------------------|
| G45019a | TrGC   | LISOPACOOH + OH $\rightarrow$ LISOPACO2                                                                                                                                                                                                                                                                            | k_R00HRO                                                | Sander et al. (2019)                         |
| G45019b | TrGC   | LISOPACOOH + OH $\rightarrow$ LZCODC23DBCOOH + HO <sub>2</sub>                                                                                                                                                                                                                                                     | k_s*f_allyl*f_sOH                                       | Sander et al. (2019)                         |
| G45019c | TrGC   | LISOPACOOH + OH $\rightarrow$ LHC4ACCHO + OH                                                                                                                                                                                                                                                                       | (k_s*f_s00H*f_allyl+ k_R0HRO)                           | Sander et al. (2019)                         |
| G45019d | TrGC   | LISOPACOOH + OH $\rightarrow$ LIEPOX + OH                                                                                                                                                                                                                                                                          | (k_adt+k_ads)*a_CH2OH*a_CH200H                          | Sander et al. (2019)*                        |
| G45020  | TrGC   | ISOPAOH + OH $\rightarrow$ LHC4ACCHO + HO <sub>2</sub>                                                                                                                                                                                                                                                             | (k_adt+k_ads)*a_CH2OH*a_CH20H+k_s*f_sOH*f_allyl+k_R0HRO | Sander et al. (2019)                         |
| G45021  | TrGCN  | LISOPACNO3 + OH $\rightarrow$ LISOPACNO3O2                                                                                                                                                                                                                                                                         | (k_adt+k_ads)*a_CH2ON02*a_CH2OH                         | Sander et al. (2019)*                        |
| G45022  | TrGC   | ISOPBO2 $\rightarrow$ .8 MVK + .8 HCHO + .8 HO <sub>2</sub> + .2 ISOPBOH                                                                                                                                                                                                                                           | k1_R02ISOPBO2                                           | Rickard (2022)                               |
| G45023a | TrGC   | ISOPBO2 + HO <sub>2</sub> $\rightarrow$ ISOPBOOH                                                                                                                                                                                                                                                                   | k_R02_HO2(temp,5)*(1.-r_CHOHCH2O2_OH)                   | Sander et al. (2019)                         |
| G45023b | TrGC   | ISOPBO2 + HO <sub>2</sub> $\rightarrow$ MVK + HCHO + HO <sub>2</sub> + OH                                                                                                                                                                                                                                          | k_R02_HO2(temp,5)*r_CHOHCH2O2_OH                        | Sander et al. (2019)                         |
| G45024a | TrGCN  | ISOPBO2 + NO $\rightarrow$ MVK + HCHO + HO <sub>2</sub> + NO <sub>2</sub>                                                                                                                                                                                                                                          | KR02N0*(1.-alpha_AN(6,3,0,0,0,temp,cair))               | Lockwood et al. (2010), Sander et al. (2019) |
| G45024b | TrGCN  | ISOPBO2 + NO $\rightarrow$ ISOPBNO3                                                                                                                                                                                                                                                                                | KR02N0*alpha_AN(6,3,0,0,0,temp,cair)                    | Lockwood et al. (2010), Sander et al. (2019) |
| G45025  | TrGCN  | ISOPBO2 + NO <sub>3</sub> $\rightarrow$ MVK + .75 HCHO + .75 HO <sub>2</sub> + .25 CH <sub>3</sub> + NO <sub>2</sub>                                                                                                                                                                                               | KR02N03                                                 | Rickard (2022)                               |
| G45026a | TrGC   | ISOPBOOH + OH $\rightarrow$ LIEPOX + OH                                                                                                                                                                                                                                                                            | (k_ads+k_adp)*a_CH200H                                  | Paulot et al. (2009b), Sander et al. (2019)  |
| G45026b | TrGC   | ISOPBOOH + OH $\rightarrow$ ISOPBO2                                                                                                                                                                                                                                                                                | k_R00HRO                                                | Sander et al. (2019)                         |
| G45026c | TrGC   | ISOPBOOH + OH $\rightarrow$ MGLYOX + HOCH <sub>2</sub> CHO                                                                                                                                                                                                                                                         | k_R0HRO+k_s*f_alk*f_sOH                                 | Sander et al. (2019)                         |
| G45027  | TrGC   | ISOPBOOH + O <sub>3</sub> $\rightarrow$ .1368 MACROOH + .1368 H <sub>2</sub> O <sub>2</sub> + .2280 HO <sub>2</sub> + .4332 CH <sub>3</sub> COCH <sub>2</sub> OH + .2280 CO <sub>2</sub> + .6384 OH + .2052 CO + .57 HCHO + .43 MACROOH + .06880 HO <sub>2</sub> + .06880 OH + .2709 CO + .1591 CH <sub>2</sub> OO | 1.E-17                                                  | Sander et al. (2019)                         |
| G45028  | TrGC   | ISOPBOH + OH $\rightarrow$ MVK + .75 HCHO + .75 HO <sub>2</sub> + .25 CH <sub>3</sub>                                                                                                                                                                                                                              | k_s*f_alk*f_sOH+(k_adp+k_ads)*a_CH2OH                   | Sander et al. (2019)                         |
| G45029  | TrGCN  | ISOPBNO3 + OH $\rightarrow$ ISOPBDNO3O2                                                                                                                                                                                                                                                                            | (k_adt+k_adp)*f_CH2ON02                                 | Sander et al. (2019)                         |
| G45030  | TrGC   | ISOPDO2 $\rightarrow$ .8 MACR + .8 HCHO + .8 HO <sub>2</sub> + .1 HCOC5 + .1 ISOPDOH                                                                                                                                                                                                                               | k1_R02ISOPDO2                                           | Rickard (2022)                               |
| G45031a | TrGC   | ISOPDO2 + HO <sub>2</sub> $\rightarrow$ ISOPDOOH                                                                                                                                                                                                                                                                   | k_R02_HO2(temp,5)*(1.-r_CHOHCH2O2_OH)                   | Sander et al. (2019)                         |
| G45031b | TrGC   | ISOPDO2 + HO <sub>2</sub> $\rightarrow$ MACR + HCHO + HO <sub>2</sub> + OH                                                                                                                                                                                                                                         | k_R02_HO2(temp,5)*r_CHOHCH2O2_OH                        | Sander et al. (2019)                         |
| G45032a | TrGCN  | ISOPDO2 + NO $\rightarrow$ MACR + HCHO + HO <sub>2</sub> + NO <sub>2</sub>                                                                                                                                                                                                                                         | KR02N0*(1.-alpha_AN(6,2,0,0,0,temp,cair))               | Lockwood et al. (2010), Sander et al. (2019) |

Table 1: Gas phase reactions (... continued)

| #       | labels | reaction                                                                                                                                                                                                                                                              | rate coefficient                                                        | reference                                    |
|---------|--------|-----------------------------------------------------------------------------------------------------------------------------------------------------------------------------------------------------------------------------------------------------------------------|-------------------------------------------------------------------------|----------------------------------------------|
| G45032b | TrGCN  | ISOPDO2 + NO $\rightarrow$ ISOPDNO3                                                                                                                                                                                                                                   | KR02N0*alpha_AN(6,2,0,0,0,temp, cair)                                   | Lockwood et al. (2010), Sander et al. (2019) |
| G45033  | TrGCN  | ISOPDO2 + NO <sub>3</sub> $\rightarrow$ MACR + HCHO + HO <sub>2</sub> + NO <sub>2</sub>                                                                                                                                                                               | KR02N03                                                                 | Rickard (2022)                               |
| G45034a | TrGC   | ISOPDOOH + OH $\rightarrow$ LIEPOX + OH                                                                                                                                                                                                                               | (k_adt+k_adp)*a_CH200H                                                  | Paulot et al. (2009b), Sander et al. (2019)  |
| G45034b | TrGC   | ISOPDOOH + OH $\rightarrow$ ISOPDO2                                                                                                                                                                                                                                   | k_R00HRO                                                                | Sander et al. (2019)                         |
| G45034c | TrGC   | ISOPDOOH + OH $\rightarrow$ HCOC5 + OH                                                                                                                                                                                                                                | k_t*f_t00H*f_allyl*f_pCH20H                                             | Sander et al. (2019)                         |
| G45034d | TrGC   | ISOPDOOH + OH $\rightarrow$ CH <sub>3</sub> COCH <sub>2</sub> OH + GLYOX + OH                                                                                                                                                                                         | k_s*f_pCH20H*f_sOH                                                      | Sander et al. (2019)                         |
| G45035  | TrGC   | ISOPDOOH + O <sub>3</sub> $\rightarrow$ 1.393 OH + BIACETOH + .67 HCHO + .05280 HO <sub>2</sub> + .2079 CO + .1221 CH <sub>2</sub> OO                                                                                                                                 | 1.E-17                                                                  | Sander et al. (2019)                         |
| G45036  | TrGC   | ISOPDOH + OH $\rightarrow$ HCOC5 + HO <sub>2</sub>                                                                                                                                                                                                                    | 2.*k_R0HRO+(k_t*f_t0H*f_allyl+k_s*f_sOH)*f_pCH20H+(k_adt+k_adp)*a_CH20H | Sander et al. (2019)                         |
| G45037  | TrGCN  | ISOPDNO3 + OH $\rightarrow$ ISOPBDNO3O2                                                                                                                                                                                                                               | (k_adp+k_ads)*a_CH20N02                                                 | Sander et al. (2019)*                        |
| G45038  | TrGCN  | NISOP02 $\rightarrow$ .8 NC4CHO + .6 HO <sub>2</sub> + .2 LISOPACNO3                                                                                                                                                                                                  | k1_R02LISOPAC02                                                         | Rickard (2022)                               |
| G45039  | TrGCN  | NISOP02 + HO <sub>2</sub> $\rightarrow$ NISOP0OH                                                                                                                                                                                                                      | k_R02_H02(temp,5)                                                       | Rickard (2022)                               |
| G45040  | TrGCN  | NISOP02 + NO $\rightarrow$ NC4CHO + HO <sub>2</sub> + NO <sub>2</sub>                                                                                                                                                                                                 | KR02N0                                                                  | Rickard (2022)*                              |
| G45041  | TrGCN  | NISOP02 + NO <sub>3</sub> $\rightarrow$ NC4CHO + HO <sub>2</sub> + NO <sub>2</sub>                                                                                                                                                                                    | KR02N03                                                                 | Rickard (2022)                               |
| G45042  | TrGCN  | NISOP0OH + OH $\rightarrow$ NC4CHO + OH                                                                                                                                                                                                                               | 1.03E-10                                                                | Rickard (2022)                               |
| G45043  | TrGCN  | NC4CHO + OH $\rightarrow$ LNISO3                                                                                                                                                                                                                                      | (k_adt+k_ads)*a_CH0*a_CH20N02                                           | Sander et al. (2019)*                        |
| G45044  | TrGCN  | NC4CHO + O <sub>3</sub> $\rightarrow$ .27 NOA + .027 HCOCO <sub>2</sub> H + .0162 GLYOX + .0162 H <sub>2</sub> O <sub>2</sub> + .1458 HCOCO + .0405 HCOOH + .0405 CO + .8758 OH + .365 MGLYOX + .73 NO <sub>2</sub> + 0.7705 HCHO + .4055 CO <sub>2</sub> + .73 GLYOX | 2.40E-17                                                                | Sander et al. (2019)                         |
| G45045  | TrGCN  | NC4CHO + NO <sub>3</sub> $\rightarrow$ LNISO3 + HNO <sub>3</sub>                                                                                                                                                                                                      | KN03AL*4.25                                                             | Rickard (2022)                               |
| G45046  | TrGCN  | LNISO3 + HO <sub>2</sub> $\rightarrow$ LNISOOH                                                                                                                                                                                                                        | 0.5*k_R02_H02(temp,5)+0.5*KAPH02                                        | Rickard (2022)                               |
| G45047  | TrGCN  | LNISO3 + NO $\rightarrow$ NOA + .5 HOCHCHO + .5 CO + .5 HO <sub>2</sub> + NO <sub>2</sub> + .5 CO <sub>2</sub>                                                                                                                                                        | 0.5*KAPN0+0.5*KR02N0                                                    | Rickard (2022)*                              |
| G45048  | TrGCN  | LNISO3 + NO <sub>3</sub> $\rightarrow$ NOA + .5 HOCHCHO + .5 CO + .5 HO <sub>2</sub> + NO <sub>2</sub> + .5 CO <sub>2</sub>                                                                                                                                           | KR02N03*1.37                                                            | Rickard (2022)                               |
| G45049  | TrGCN  | LNISOOH + OH $\rightarrow$ LNISO3                                                                                                                                                                                                                                     | 2.65E-11                                                                | Rickard (2022)                               |
| G45050a | TrGC   | LHC4ACCHO + OH $\rightarrow$ LC578O2                                                                                                                                                                                                                                  | (k_adtertprim+k_ads)*a_CH0*a_CH20H                                      | Sander et al. (2019)                         |
| G45050b | TrGC   | LHC4ACCHO + OH $\rightarrow$ LHC4ACCO3                                                                                                                                                                                                                                | k_t*f_0                                                                 | Sander et al. (2019)                         |
| G45050c | TrGC   | LHC4ACCHO + OH $\rightarrow$ C4MDIAL + HO <sub>2</sub>                                                                                                                                                                                                                | k_s*f_sOH*f_allyl                                                       | Sander et al. (2019)                         |



Table 1: Gas phase reactions (... continued)

| #       | labels | reaction                                                                                                                                                                                                                                                                                                                                                                                          | rate coefficient                                                      | reference            |
|---------|--------|---------------------------------------------------------------------------------------------------------------------------------------------------------------------------------------------------------------------------------------------------------------------------------------------------------------------------------------------------------------------------------------------------|-----------------------------------------------------------------------|----------------------|
| G45051  | TrGC   | $\text{LHC4ACCHO} + \text{O}_3 \rightarrow .2225 \text{ CH}_3\text{C(O)} + .89 \text{ CO} + .0171875 \text{ HOCH}_2\text{CO}_2\text{H} + .075625 \text{ H}_2\text{O}_2 + .0171875 \text{ HCOCO}_2\text{H} + .2775 \text{ CH}_3\text{COCH}_2\text{OH} + .6675 \text{ HO}_2 + .2603125 \text{ GLYOX} + .2225 \text{ HCHO} + .89 \text{ OH} + .2603125 \text{ HOCH}_2\text{CHO} + .5 \text{ MGLYOX}$ | 2.40E-17                                                              | Rickard (2022)       |
| G45052  | TrGCN  | $\text{LHC4ACCHO} + \text{NO}_3 \rightarrow \text{LHC4ACCO}_3 + \text{HNO}_3$                                                                                                                                                                                                                                                                                                                     | KN03AL*4.25                                                           | Rickard (2022)       |
| G45053  | TrGC   | $\text{LC578O}_2 \rightarrow .25 \text{ CH}_3\text{COCH}_2\text{OH} + .75 \text{ MGLYOX} + .25 \text{ HOCHCHO} + .75 \text{ HOCH}_2\text{CHO} + .75 \text{ HO}_2$                                                                                                                                                                                                                                 | k1_R02t0R02                                                           | Rickard (2022)       |
| G45054a | TrGC   | $\text{LC578O}_2 + \text{HO}_2 \rightarrow \text{MGLYOX} + \text{HOCH}_2\text{CHO} + \text{OH}$                                                                                                                                                                                                                                                                                                   | k_R02_H02(temp,5)*r_COCH202_OH                                        | Rickard (2022)       |
| G45054b | TrGC   | $\text{LC578O}_2 + \text{HO}_2 \rightarrow \text{LC578OOH}$                                                                                                                                                                                                                                                                                                                                       | k_R02_H02(temp,5)*r_COCH202_OOH                                       | Rickard (2022)       |
| G45055  | TrGCN  | $\text{LC578O}_2 + \text{NO} \rightarrow .25 \text{ CH}_3\text{COCH}_2\text{OH} + .75 \text{ MGLYOX} + .25 \text{ HOCHCHO} + .75 \text{ HOCH}_2\text{CHO} + .75 \text{ HO}_2 + \text{NO}_2$                                                                                                                                                                                                       | KR02N0                                                                | Rickard (2022)*      |
| G45056  | TrGCN  | $\text{LC578O}_2 + \text{NO}_3 \rightarrow .25 \text{ CH}_3\text{COCH}_2\text{OH} + .75 \text{ MGLYOX} + .25 \text{ HOCHCHO} + .75 \text{ HOCH}_2\text{CHO} + .75 \text{ HO}_2 + \text{NO}_2$                                                                                                                                                                                                     | KR02N03                                                               | Rickard (2022)       |
| G45057  | TrGC   | $\text{LC578O}_2 \rightarrow .25 \text{ CH}_3\text{COCH}_2\text{OH} + .75 \text{ MGLYOX} + .25 \text{ HOCH}_2\text{CHO} + .75 \text{ HOCH}_2\text{CHO} + \text{HO}_2 + \text{OH}$                                                                                                                                                                                                                 | k_hsb                                                                 | Sander et al. (2019) |
| G45058a | TrGC   | $\text{LC578OOH} + \text{OH} \rightarrow \text{LC578O}_2$                                                                                                                                                                                                                                                                                                                                         | k_R00HRO                                                              | Sander et al. (2019) |
| G45058b | TrGC   | $\text{LC578OOH} + \text{OH} \rightarrow \text{C10DC2OOHC4OD} + \text{HO}_2$                                                                                                                                                                                                                                                                                                                      | k_t*f_0*f_tCH20H*f_alk+k_t*f_tOH*f_pCH20H*f_pCH20H+k_s*f_sOH*f_pCH20H | Sander et al. (2019) |
| G45059a | TrGC   | $\text{LHC4ACCO}_3 \rightarrow \text{OH} + .5 \text{ MACRO}_2 + .5 \text{ LHMVKABO}_2 + \text{CO}_2$                                                                                                                                                                                                                                                                                              | k1_R02RC03*0.9                                                        | Sander et al. (2019) |
| G45059b | TrGC   | $\text{LHC4ACCO}_3 \rightarrow \text{LHC4ACCO}_2\text{H}$                                                                                                                                                                                                                                                                                                                                         | k1_R02RC03*0.1                                                        | Sander et al. (2019) |
| G45060a | TrGC   | $\text{LHC4ACCO}_3 + \text{HO}_2 \rightarrow 2 \text{ OH} + .5 \text{ MACRO}_2 + .5 \text{ LHMVKABO}_2 + \text{CO}_2$                                                                                                                                                                                                                                                                             | KAPH02*r_C03_OH                                                       | Sander et al. (2019) |
| G45060b | TrGC   | $\text{LHC4ACCO}_3 + \text{HO}_2 \rightarrow \text{LHC4ACCO}_3\text{H}$                                                                                                                                                                                                                                                                                                                           | KAPH02*r_C03_OOH                                                      | Sander et al. (2019) |
| G45060c | TrGC   | $\text{LHC4ACCO}_3 + \text{HO}_2 \rightarrow \text{LHC4ACCO}_2\text{H} + \text{O}_3$                                                                                                                                                                                                                                                                                                              | KAPH02*r_C03_O3                                                       | Sander et al. (2019) |
| G45061  | TrGCN  | $\text{LHC4ACCO}_3 + \text{NO} \rightarrow .5 \text{ MACRO}_2 + .5 \text{ LHMVKABO}_2 + \text{NO}_2 + \text{CO}_2$                                                                                                                                                                                                                                                                                | KAPN0                                                                 | Sander et al. (2019) |
| G45062  | TrGCN  | $\text{LHC4ACCO}_3 + \text{NO}_2 \rightarrow \text{LC5PAN1719}$                                                                                                                                                                                                                                                                                                                                   | k_CH3C03_N02                                                          | Rickard (2022)       |
| G45063  | TrGCN  | $\text{LHC4ACCO}_3 + \text{NO}_3 \rightarrow .5 \text{ MACRO}_2 + .5 \text{ LHMVKABO}_2 + \text{NO}_2 + \text{CO}_2$                                                                                                                                                                                                                                                                              | KR02N03*1.74                                                          | Sander et al. (2019) |
| G45064a | TrGC   | $\text{LHC4ACCO}_2\text{H} + \text{OH} \rightarrow \text{OH} + .5 \text{ MACRO}_2 + .5 \text{ LHMVKABO}_2 + \text{CO}_2$                                                                                                                                                                                                                                                                          | 2.52E-11                                                              | Sander et al. (2019) |
| G45064b | TrGC   | $\text{LHC4ACCO}_3\text{H} + \text{OH} \rightarrow \text{LHC4ACCO}_3$                                                                                                                                                                                                                                                                                                                             | 2.88E-11                                                              | Rickard (2022)       |

Table 1: Gas phase reactions (... continued)

| #       | labels | reaction                                                                                                                                                                                                                                                                                                                                                                                                                                                                                                                                                                                                                                                                                                                                                                             | rate coefficient                                       | reference                                                         |
|---------|--------|--------------------------------------------------------------------------------------------------------------------------------------------------------------------------------------------------------------------------------------------------------------------------------------------------------------------------------------------------------------------------------------------------------------------------------------------------------------------------------------------------------------------------------------------------------------------------------------------------------------------------------------------------------------------------------------------------------------------------------------------------------------------------------------|--------------------------------------------------------|-------------------------------------------------------------------|
| G45065  | TrGCN  | LC5PAN1719 $\rightarrow$ LHC4ACCO3 + NO <sub>2</sub>                                                                                                                                                                                                                                                                                                                                                                                                                                                                                                                                                                                                                                                                                                                                 | k_PAN_M                                                | Rickard (2022)                                                    |
| G45066  | TrGCN  | LC5PAN1719 + OH $\rightarrow$ .5 MACROH + .5 HO12CO3C4 + CO + NO <sub>2</sub>                                                                                                                                                                                                                                                                                                                                                                                                                                                                                                                                                                                                                                                                                                        | 2.52E-11                                               | Rickard (2022)                                                    |
| G45067  | TrGC   | HCOC5 + OH $\rightarrow$ C59O2                                                                                                                                                                                                                                                                                                                                                                                                                                                                                                                                                                                                                                                                                                                                                       | 3.81E-11                                               | Rickard (2022)                                                    |
| G45068  | TrGC   | HCOC5 + O <sub>3</sub> $\rightarrow$ BIACETOH + .335 H <sub>2</sub> O <sub>2</sub> + .67 HCHO + .2079 CO + .1221 CH <sub>2</sub> OO + .05280 OH                                                                                                                                                                                                                                                                                                                                                                                                                                                                                                                                                                                                                                      | 7.51E-16*EXP(-1521./temp)                              | Sander et al. (2019)                                              |
| G45069  | TrGC   | C59O2 $\rightarrow$ CH <sub>3</sub> COCH <sub>2</sub> OH + HOCH <sub>2</sub> CO                                                                                                                                                                                                                                                                                                                                                                                                                                                                                                                                                                                                                                                                                                      | k1_R02t0R02                                            | Sander et al. (2019)                                              |
| G45070a | TrGC   | C59O2 + HO <sub>2</sub> $\rightarrow$ OH + CH <sub>3</sub> COCH <sub>2</sub> OH + HOCH <sub>2</sub> CO                                                                                                                                                                                                                                                                                                                                                                                                                                                                                                                                                                                                                                                                               | k_R02_H02(temp,5)*r_COCH202_OH                         | Sander et al. (2019)                                              |
| G45070b | TrGC   | C59O2 + HO <sub>2</sub> $\rightarrow$ C59OOH                                                                                                                                                                                                                                                                                                                                                                                                                                                                                                                                                                                                                                                                                                                                         | k_R02_H02(temp,5)*r_COCH202_OOH                        | Sander et al. (2019)                                              |
| G45071  | TrGCN  | C59O2 + NO $\rightarrow$ CH <sub>3</sub> COCH <sub>2</sub> OH + HOCH <sub>2</sub> CO + NO <sub>2</sub>                                                                                                                                                                                                                                                                                                                                                                                                                                                                                                                                                                                                                                                                               | KR02N0                                                 | Sander et al. (2019)*                                             |
| G45072  | TrGCN  | C59O2 + NO <sub>3</sub> $\rightarrow$ CH <sub>3</sub> COCH <sub>2</sub> OH + HOCH <sub>2</sub> CO + NO <sub>2</sub>                                                                                                                                                                                                                                                                                                                                                                                                                                                                                                                                                                                                                                                                  | KR02N03                                                | Sander et al. (2019)                                              |
| G45073  | TrGC   | C59OOH + OH $\rightarrow$ C59O2                                                                                                                                                                                                                                                                                                                                                                                                                                                                                                                                                                                                                                                                                                                                                      | 9.7E-12                                                | Rickard (2022)                                                    |
| G45074  | TrGC   | LIEPOX + OH $\rightarrow$ DB1O2 + H <sub>2</sub> O                                                                                                                                                                                                                                                                                                                                                                                                                                                                                                                                                                                                                                                                                                                                   | 5.78E-11*EXP(-400./temp)<br>*(1.52/3.+0.98*2./3.)/1.51 | Paulot et al. (2009b), Bates et al. (2014), Sander et al. (2019)* |
| G45075  | TrGC   | ISOPBO2 $\rightarrow$ MVK + HCHO + OH                                                                                                                                                                                                                                                                                                                                                                                                                                                                                                                                                                                                                                                                                                                                                | k_hsb                                                  | Sander et al. (2019)                                              |
| G45076  | TrGC   | ISOPDO2 $\rightarrow$ MACR + HCHO + OH                                                                                                                                                                                                                                                                                                                                                                                                                                                                                                                                                                                                                                                                                                                                               | k_hsd                                                  | Sander et al. (2019)                                              |
| G45077a | TrGC   | LZCODC23DBCOOH + OH $\rightarrow$ .6 C1ODC2O2C4OOH + .4 C1OOHC2O2C4OD                                                                                                                                                                                                                                                                                                                                                                                                                                                                                                                                                                                                                                                                                                                | k_adt*a_CH0*a_CH200H                                   | Sander et al. (2019)                                              |
| G45077b | TrGC   | LZCODC23DBCOOH + OH $\rightarrow$ .6 C1ODC3O2C4OOH + .4 C1OOHC3O2C4OD                                                                                                                                                                                                                                                                                                                                                                                                                                                                                                                                                                                                                                                                                                                | k_ads*a_CH0*a_CH200H                                   | Sander et al. (2019)                                              |
| G45077c | TrGC   | LZCODC23DBCOOH + OH $\rightarrow$ LZCO3HC23DBCOD                                                                                                                                                                                                                                                                                                                                                                                                                                                                                                                                                                                                                                                                                                                                     | k_t*f_0*f_alk+k_R00HR0                                 | Sander et al. (2019)                                              |
| G45077d | TrGC   | LZCODC23DBCOOH + OH $\rightarrow$ C4MDIAL + OH                                                                                                                                                                                                                                                                                                                                                                                                                                                                                                                                                                                                                                                                                                                                       | k_s*f_s00H*f_allyl                                     | Sander et al. (2019)                                              |
| G45078  | TrGC   | LZCODC23DBCOOH + O <sub>3</sub> $\rightarrow$ .4672 OH + .2336 HCOCOCH <sub>2</sub> O <sub>2</sub> + .2336 CO + .2336 CH <sub>3</sub> C(O) + .4672 HOOCH <sub>2</sub> CHO + .1728 MGLYOX + .1901 OH + .0864 GLYOX + .02765 HOOCH <sub>2</sub> CHO + .02765 H <sub>2</sub> O <sub>2</sub> + .02592 CH <sub>3</sub> OOH + .02592 CO <sub>2</sub> + .01037 HCOCO + .01555 CH <sub>2</sub> OO + .01555 CO + .006908 HOOCH <sub>2</sub> CO <sub>3</sub> + .2628 OH + .1314 MGLYOX + .1314 OH + .1314 HCOCOCH <sub>2</sub> OOH + .2628 GLYOX + .0972 CH <sub>3</sub> COCH <sub>2</sub> O <sub>2</sub> H + .00972 HCOCO <sub>2</sub> H + .005832 GLYOX + .005832 H <sub>2</sub> O <sub>2</sub> + .05249 OH + .05249 HCOCO + .01458 HCHO + .01458 CO <sub>2</sub> + .01458 HCOOH + .01458 CO | 2.4E-17                                                | Sander et al. (2019)                                              |
| G45079  | TrGC   | C1OOHC2O2C4OD $\rightarrow$ .78 CH <sub>3</sub> COCH <sub>2</sub> O <sub>2</sub> H + .78 HOCHCHO + .22 CO2H3CHO + .22 HCHO + .22 OH                                                                                                                                                                                                                                                                                                                                                                                                                                                                                                                                                                                                                                                  | k1_R02t0R02                                            | Sander et al. (2019)                                              |

Table 1: Gas phase reactions (... continued)

| #       | labels | reaction                                                                                                                                                                                                      | rate coefficient                                                                                                    | reference             |
|---------|--------|---------------------------------------------------------------------------------------------------------------------------------------------------------------------------------------------------------------|---------------------------------------------------------------------------------------------------------------------|-----------------------|
| G45080  | TrGCN  | $\text{C10OHC2O2C4OD} + \text{NO} \rightarrow .78 \text{ CH}_3\text{COCH}_2\text{O}_2\text{H} + .78 \text{ HOCHCHO} + .22 \text{ CO}_2\text{H}_3\text{CHO} + .22 \text{ HCHO} + .22 \text{ OH} + \text{NO}_2$ | KR02N0                                                                                                              | Sander et al. (2019)* |
| G45081a | TrGC   | $\text{C10OHC2O2C4OD} + \text{HO}_2 \rightarrow \text{C10OHC2OOHC4OD}$                                                                                                                                        | $k_{\text{R02\_H02}}(\text{temp}, 5) * r_{\text{COCH202\_00H}}$                                                     | Sander et al. (2019)  |
| G45081b | TrGC   | $\text{C10OHC2O2C4OD} + \text{HO}_2 \rightarrow .78 \text{ CH}_3\text{COCH}_2\text{O}_2\text{H} + .78 \text{ HOCHCHO} + .22 \text{ CO}_2\text{H}_3\text{CHO} + .22 \text{ HCHO} + 1.22 \text{ OH}$            | $k_{\text{R02\_H02}}(\text{temp}, 5) * r_{\text{COCH202\_OH}}$                                                      | Sander et al. (2019)  |
| G45082  | TrGC   | $\text{C10OHC2O2C4OD} \rightarrow \text{CH}_3\text{COCH}_2\text{O}_2\text{H} + \text{GLYOX} + \text{OH}$                                                                                                      | $k_{\text{hsb}}$                                                                                                    | Sander et al. (2019)  |
| G45083  | TrGC   | $\text{C1ODC2O2C4OOH} \rightarrow \text{OH} + \text{C1ODC2OOHC4OD}$                                                                                                                                           | $k_{15\text{hsd}\text{hb}}$                                                                                         | Sander et al. (2019)  |
| G45084a | TrGC   | $\text{C10OHC2OOHC4OD} + \text{OH} \rightarrow \text{C1ODC2OOHC4OD} + \text{OH}$                                                                                                                              | $2 * k_{\text{s}} * f_{\text{s00H}} * f_{\text{tCH2OH}}$                                                            | Sander et al. (2019)  |
| G45084b | TrGC   | $\text{C10OHC2OOHC4OD} + \text{OH} \rightarrow \text{CH}_3\text{COCH}_2\text{O}_2\text{H} + 2 \text{ CO} + 2 \text{ HO}_2 + \text{OH}$                                                                        | $k_{\text{t}} * f_{\text{tOH}} * f_{\text{pCH2OH}} * f_{\text{pCH2OH}}$                                             | Sander et al. (2019)  |
| G45084c | TrGC   | $\text{C10OHC2OOHC4OD} + \text{OH} \rightarrow \text{C10OHC2O2C4OD}$                                                                                                                                          | $k_{\text{R00HRO}}$                                                                                                 | Sander et al. (2019)  |
| G45085  | TrGC   | $\text{C1ODC2OOHC4OD} + \text{OH} \rightarrow \text{CO}_2\text{H}_3\text{CHO} + \text{CO} + \text{H}_2\text{O} + \text{OH}$                                                                                   | $k_{\text{t}} * f_{\text{O}} * f_{\text{tCH2OH}} + k_{\text{t}} * f_{\text{tOH}} * f_{\text{tOH}} * f_{\text{CHO}}$ | Sander et al. (2019)  |
| G45086  | TrGC   | $\text{C1ODC3O2C4OOH} \rightarrow \text{MGLYOX} + \text{HOOCH}_2\text{CHO} + \text{HO}_2$                                                                                                                     | $k_{1\text{R02sOR02}}$                                                                                              | Sander et al. (2019)  |
| G45087  | TrGCN  | $\text{C1ODC3O2C4OOH} + \text{NO} \rightarrow \text{MGLYOX} + \text{HOOCH}_2\text{CHO} + \text{HO}_2 + \text{NO}_2$                                                                                           | KR02N0                                                                                                              | Sander et al. (2019)  |
| G45088  | TrGC   | $\text{C1ODC3O2C4OOH} + \text{HO}_2 \rightarrow .5 \text{ CH}_3\text{C(O)} + .5 \text{ CO} + .5 \text{ MGLYOX} + .5 \text{ HO}_2 + \text{HOOCH}_2\text{CO}_3$                                                 | $k_{\text{R02\_H02}}(\text{temp}, 5)$                                                                               | Sander et al. (2019)  |
| G45089  | TrGC   | $\text{C1ODC3O2C4OOH} \rightarrow \text{MGLYOX} + \text{OH} + \text{HOOCH}_2\text{CHO}$                                                                                                                       | $k_{\text{hsd}}$                                                                                                    | Sander et al. (2019)  |
| G45090  | TrGC   | $\text{C10OHC3O2C4OD} \rightarrow .625 \text{ MGLYOX} + 2 \text{ CO} + 1.625 \text{ HO}_2 + .375 \text{ CH}_3\text{C(O)} + .375 \text{ CO}_2 + \text{OH}$                                                     | $k_{15\text{hsd}\text{hb}}$                                                                                         | Sander et al. (2019)  |
| G45091  | TrGC   | $\text{LHC4ACCO}_3 \rightarrow \text{LZCO}_3\text{HC23DBCOD} + \text{HO}_2$                                                                                                                                   | $k_{16\text{hs}}$                                                                                                   | Sander et al. (2019)  |
| G45092a | TrGC   | $\text{C4MDIAL} + \text{OH} \rightarrow \text{C1ODC2O2C4OD}$                                                                                                                                                  | $(k_{\text{adt}} + k_{\text{ads}}) * a_{\text{CHO}} * a_{\text{CHO}}$                                               | Sander et al. (2019)* |
| G45092b | TrGC   | $\text{C4MDIAL} + \text{OH} \rightarrow \text{LZCO}_3\text{C23DBCOD}$                                                                                                                                         | $2 * k_{\text{t}} * f_{\text{O}} * f_{\text{alk}}$                                                                  | Sander et al. (2019)* |
| G45093  | TrGCN  | $\text{C4MDIAL} + \text{NO}_3 \rightarrow \text{LZCO}_3\text{C23DBCOD} + \text{HNO}_3$                                                                                                                        | $\text{KN03AL} * 4.25 * 2.$                                                                                         | Sander et al. (2019)* |
| G45094a | TrGC   | $\text{C1ODC2O2C4OD} + \text{HO}_2 \rightarrow \text{OH} + \text{MGLYOX} + \text{HOCHCHO}$                                                                                                                    | $k_{\text{R02\_H02}}(\text{temp}, 5) * r_{\text{COCH202\_OH}}$                                                      | Sander et al. (2019)  |
| G45094b | TrGC   | $\text{C1ODC2O2C4OD} + \text{HO}_2 \rightarrow \text{C1ODC2OOHC4OD}$                                                                                                                                          | $k_{\text{R02\_H02}}(\text{temp}, 5) * r_{\text{COCH202\_00H}}$                                                     | Sander et al. (2019)  |
| G45095  | TrGCN  | $\text{C1ODC2O2C4OD} + \text{NO} \rightarrow \text{NO}_2 + \text{MGLYOX} + \text{HOCHCHO}$                                                                                                                    | KR02N0                                                                                                              | Sander et al. (2019)* |
| G45096  | TrGC   | $\text{C1ODC2O2C4OD} \rightarrow \text{MGLYOX} + \text{HOCHCHO}$                                                                                                                                              | $k_{1\text{R02tOR02}}$                                                                                              | Sander et al. (2019)  |

Table 1: Gas phase reactions (... continued)

| #       | labels | reaction                                                                                                                                                                                                                                                                                                                                                                                                                         | rate coefficient                                                                     | reference                                      |
|---------|--------|----------------------------------------------------------------------------------------------------------------------------------------------------------------------------------------------------------------------------------------------------------------------------------------------------------------------------------------------------------------------------------------------------------------------------------|--------------------------------------------------------------------------------------|------------------------------------------------|
| G45097a | TrGC   | $\text{C10DC2OOHC4OD} + \text{OH} \rightarrow \text{MGLYOX} + 2 \text{ CO}$                                                                                                                                                                                                                                                                                                                                                      | $(2.*k\_tf\_0*f\_t\text{CH2OH}*f\_alk+k\_tf\_t\text{OH}*f\_CHO*f\_p\text{CH2OH})*.5$ | Sander et al. (2019)                           |
| G45097b | TrGC   | $\text{C10DC2OOHC4OD} + \text{OH} \rightarrow \text{MGLYOX} + 2 \text{ CO} + \text{OH}$                                                                                                                                                                                                                                                                                                                                          | $(2.*k\_tf\_0*f\_t\text{CH2OH}*f\_alk+k\_tf\_t\text{OH}*f\_CHO*f\_p\text{CH2OH})*.5$ | Sander et al. (2019)                           |
| G45098  | TrGCN  | $\text{LISOPACNO3O2} + \text{NO} \rightarrow .21 \text{ NOA} + .21 \text{ HOCH}_2\text{CHO} + .21 \text{ HO}_2 + .49 \text{ HO12CO3C4} + .49 \text{ HCHO} + .49 \text{ NO}_2 + .045 \text{ MVKNO3} + .045 \text{ HCHO} + .255 \text{ CH}_3\text{COCH}_2\text{OH} + .255 \text{ NO}_3\text{CH}_2\text{CHO} + .225 \text{ H}_2\text{O}_2 + \text{NO}_2$                                                                            | KR02NO                                                                               | Sander et al. (2019)*                          |
| G45099  | TrGCN  | $\text{LISOPACNO3O2} \rightarrow .21 \text{ NOA} + .21 \text{ HOCH}_2\text{CHO} + .21 \text{ HO}_2 + .49 \text{ HO12CO3C4} + .49 \text{ HCHO} + .49 \text{ NO}_2 + .045 \text{ MVKNO3} + .045 \text{ HCHO} + .255 \text{ CH}_3\text{COCH}_2\text{OH} + .255 \text{ NO}_3\text{CH}_2\text{CHO} + .225 \text{ H}_2\text{O}_2$                                                                                                      | $k1\_R02t\text{OR02}+k\_R02\_H02(\text{temp},5)*c(\text{ind\_H02})$                  | Sander et al. (2019)                           |
| G45100  | TrGCN  | $\text{ISOPBDNO3O2} + \text{NO} \rightarrow .6 \text{ CH}_3\text{COCH}_2\text{OH} + .6 \text{ HOCH}_2\text{CHO} + .26 \text{ MACRNO3} + .14 \text{ MVKNO3} + .4 \text{ HCHO} + .4 \text{ HO}_2 + 1.6 \text{ NO}_2$                                                                                                                                                                                                               | KR02NO                                                                               | Sander et al. (2019)*                          |
| G45101  | TrGCN  | $\text{ISOPBDNO3O2} \rightarrow .6 \text{ CH}_3\text{COCH}_2\text{OH} + .6 \text{ HOCH}_2\text{CHO} + .26 \text{ MACRNO3} + .14 \text{ MVKNO3} + .4 \text{ HCHO} + .4 \text{ HO}_2 + .6 \text{ NO}_2$                                                                                                                                                                                                                            | $k1\_R02s\text{OR02}+k\_R02\_H02(\text{temp},5)*c(\text{ind\_H02})$                  | Sander et al. (2019)                           |
| G45102  | TrGCN  | $\text{LISOPACNO3} + \text{O}_3 \rightarrow .8704 \text{ OH} + .365 \text{ HO}_2 + .73 \text{ MGLYOX} + .4325 \text{ NO}_3\text{CH}_2\text{CHO} + .135 \text{ CH}_3\text{COCH}_2\text{OH} + .0675 \text{ GLYOX} + .4325 \text{ NO}_2 + .0891 \text{ H}_2\text{O}_2 + .135 \text{ NOA} + .0675 \text{ HOCHCHO} + .3866 \text{ HOCH}_2\text{CHO} + .0405 \text{ CH}_3\text{OH} + .0405 \text{ CO} + .0054 \text{ HOCH}_2\text{CO}$ | 2.8E-17                                                                              | Feierabend et al. (2008), Sander et al. (2019) |
| G45103  | TrGC   | $\text{DB1O2} \rightarrow \text{DB1O2}$                                                                                                                                                                                                                                                                                                                                                                                          | $k1\_R02s\text{OR02}$                                                                | Sander et al. (2019)                           |
| G45104a | TrGC   | $\text{DB1O2} + \text{HO}_2 \rightarrow \text{DB1OOH}$                                                                                                                                                                                                                                                                                                                                                                           | $k\_R02\_H02(\text{temp},5)*(1-r\_CHOHCH2O2\_OH)$                                    | Sander et al. (2019)*                          |
| G45104b | TrGC   | $\text{DB1O2} + \text{HO}_2 \rightarrow \text{DB1O2} + \text{OH}$                                                                                                                                                                                                                                                                                                                                                                | $k\_R02\_H02(\text{temp},5)*r\_CHOHCH2O2\_OH$                                        | Sander et al. (2019)                           |
| G45105a | TrGCN  | $\text{DB1O2} + \text{NO} \rightarrow \text{DB1O2} + \text{NO}_2$                                                                                                                                                                                                                                                                                                                                                                | $\text{KR02NO}*(1.-\alpha\_AN(7,2,0,0,0,\text{temp},\text{cair}))$                   | Sander et al. (2019)                           |
| G45105b | TrGCN  | $\text{DB1O2} + \text{NO} \rightarrow \text{DB1NO3}$                                                                                                                                                                                                                                                                                                                                                                             | $\text{KR02NO}*\alpha\_AN(7,2,0,0,0,\text{temp},\text{cair})$                        | Sander et al. (2019)                           |
| G45106  | TrGCN  | $\text{DB1O2} + \text{NO}_3 \rightarrow \text{DB1O2} + \text{NO}_2$                                                                                                                                                                                                                                                                                                                                                              | KR02NO3                                                                              | Sander et al. (2019)                           |
| G45107  | TrGC   | $\text{DB1O2} \rightarrow \text{DB1O2} + \text{OH}$                                                                                                                                                                                                                                                                                                                                                                              | 1.E4                                                                                 | Peeters and Nguyen (2012)*                     |
| G45108a | TrGC   | $\text{DB1O2} \rightarrow \text{DB1O2}$                                                                                                                                                                                                                                                                                                                                                                                          | KDEC*0.72                                                                            | see note*                                      |
| G45108b | TrGC   | $\text{DB1O2} \rightarrow .5 \text{ HVMK} + .5 \text{ HMAc} + \text{HCHO} + \text{HO}_2$                                                                                                                                                                                                                                                                                                                                         | KDEC*0.28                                                                            | see note*                                      |

Table 1: Gas phase reactions (... continued)

| #       | labels | reaction                                                                                                                                                                                                                                                                                                                                                                                                                                                                                                                                                                      | rate coefficient                                 | reference                              |
|---------|--------|-------------------------------------------------------------------------------------------------------------------------------------------------------------------------------------------------------------------------------------------------------------------------------------------------------------------------------------------------------------------------------------------------------------------------------------------------------------------------------------------------------------------------------------------------------------------------------|--------------------------------------------------|----------------------------------------|
| G45109  | TrGC   | DB1O2 $\rightarrow$ .48 CH <sub>3</sub> COCH <sub>2</sub> OH + .52 HOCH <sub>2</sub> CHO + .52 MGLYOX + .48 GLYOX + HO <sub>2</sub>                                                                                                                                                                                                                                                                                                                                                                                                                                           | k1_R02s0R02                                      | Sander et al. (2019)                   |
| G45110a | TrGC   | DB1O2 + HO <sub>2</sub> $\rightarrow$ DB2OOH                                                                                                                                                                                                                                                                                                                                                                                                                                                                                                                                  | k_R02_H02(temp,5)*(1.-r_CHOHCH202_OH)            | Sander et al. (2019)                   |
| G45110b | TrGC   | DB1O2 + HO <sub>2</sub> $\rightarrow$ .48 CH <sub>3</sub> COCH <sub>2</sub> OH + .52 HOCH <sub>2</sub> CHO + .52 MGLYOX + .48 GLYOX + HO <sub>2</sub> + OH                                                                                                                                                                                                                                                                                                                                                                                                                    | k_R02_H02(temp,5)*r_CHOHCH202_OH                 | Sander et al. (2019)                   |
| G45111  | TrGCN  | DB1O2 + NO $\rightarrow$ .48 CH <sub>3</sub> COCH <sub>2</sub> OH + .52 HOCH <sub>2</sub> CHO + .52 MGLYOX + .48 GLYOX + HO <sub>2</sub> + NO <sub>2</sub>                                                                                                                                                                                                                                                                                                                                                                                                                    | KR02N0                                           | see note*                              |
| G45112  | TrGCN  | DB1O2 + NO <sub>3</sub> $\rightarrow$ .48 CH <sub>3</sub> COCH <sub>2</sub> OH + .52 HOCH <sub>2</sub> CHO + .52 MGLYOX + .48 GLYOX + HO <sub>2</sub> + NO <sub>2</sub>                                                                                                                                                                                                                                                                                                                                                                                                       | KR02N03                                          | Sander et al. (2019)                   |
| G45113  | TrGC   | DB1O2 $\rightarrow$ .48 MACROOH + .52 LHMVKABOOH + CO + OH                                                                                                                                                                                                                                                                                                                                                                                                                                                                                                                    | k_14hsa1                                         | Sander et al. (2019)                   |
| G45114a | TrGC   | DB1OOH + OH $\rightarrow$ DB1O2                                                                                                                                                                                                                                                                                                                                                                                                                                                                                                                                               | k_R00HRO                                         | Sander et al. (2019)                   |
| G45114b | TrGC   | DB1OOH + OH $\rightarrow$ HCOOH + HO <sub>2</sub> + CH <sub>3</sub> COCHO <sub>2</sub> CHO                                                                                                                                                                                                                                                                                                                                                                                                                                                                                    | k_adt                                            | Sander et al. (2019)*                  |
| G45115  | TrGC   | DB1OOH + HCOOH $\rightarrow$ C1ODC2OOHC4OD + HCOOH                                                                                                                                                                                                                                                                                                                                                                                                                                                                                                                            | 4.67E-26*(temp)**(3.286)*EXP(4509./(1.987*temp)) | Sander et al. (2019), da Silva (2010)* |
| G45116  | TrGCN  | DB1NO3 + OH $\rightarrow$ HCOOH + NO <sub>2</sub> + CH <sub>3</sub> COCHO <sub>2</sub> CHO                                                                                                                                                                                                                                                                                                                                                                                                                                                                                    | k_adt                                            | Sander et al. (2019)*                  |
| G45117  | TrGC   | DB2OOH + OH $\rightarrow$ DB1O2                                                                                                                                                                                                                                                                                                                                                                                                                                                                                                                                               | k_R00HRO                                         | Sander et al. (2019)*                  |
| G45118  | TrGC   | LISOPACOOH + O <sub>3</sub> $\rightarrow$ 1.3272 OH + .36986 HO <sub>2</sub> + .0432 H <sub>2</sub> O <sub>2</sub> + .08422 CO + .2025 CH <sub>3</sub> OOH + .01215 CH <sub>2</sub> OO + .3704 HCHO + .00405 CH <sub>3</sub> OH + .0405 CO <sub>2</sub> + .1825 HOCH <sub>2</sub> COCH <sub>2</sub> O <sub>2</sub> + .365 MGLYOX + .3866 HOOCH <sub>2</sub> CHO + .135 CH <sub>3</sub> COCH <sub>2</sub> OH + .0675 GLYOX + .00324 HCOCO + .3866 HOCH <sub>2</sub> CHO + .135 CH <sub>3</sub> COCH <sub>2</sub> O <sub>2</sub> H + .0675 HOCHCHO + .0054 HOCH <sub>2</sub> CO | 4.829E-16                                        | Sander et al. (2019)                   |
| G45119a | TrGC   | LZCO3HC23DBCOD + OH $\rightarrow$ .62 CO <sub>2</sub> H <sub>3</sub> CHO + .62 OH + .62 CO <sub>2</sub> + .38 MGLYOX + .38 HCOCO <sub>3</sub> H + .38 HO <sub>2</sub>                                                                                                                                                                                                                                                                                                                                                                                                         | k_adt*a_CH0*a_C02H                               | Sander et al. (2019)                   |
| G45119b | TrGC   | LZCO3HC23DBCOD + OH $\rightarrow$ .62 CH <sub>3</sub> COCO <sub>3</sub> H + 1.24 CO + 1.24 HO <sub>2</sub> + .38 MGLYOX + .38 HO <sub>2</sub> + .38 CO + .38 HO <sub>2</sub> + .38 OH + .38 CO <sub>2</sub>                                                                                                                                                                                                                                                                                                                                                                   | k_ads*a_CH0*a_C02H                               | Sander et al. (2019)                   |
| G45120  | TrGC   | LISOPEFO <sub>2</sub> $\rightarrow$ LISOPEFO                                                                                                                                                                                                                                                                                                                                                                                                                                                                                                                                  | k1_R02p0R02                                      | Sander et al. (2019)                   |
| G45121a | TrGCN  | LISOPEFO <sub>2</sub> + NO $\rightarrow$ LISOPEFO + NO <sub>2</sub>                                                                                                                                                                                                                                                                                                                                                                                                                                                                                                           | KR02N0*(1.-alpha_AN(6,1,0,0,0,temp,cair))        | Sander et al. (2019)                   |
| G45121b | TrGCN  | LISOPEFO <sub>2</sub> + NO $\rightarrow$ ISOPDNO <sub>3</sub>                                                                                                                                                                                                                                                                                                                                                                                                                                                                                                                 | KR02N0*alpha_AN(6,1,0,0,0,temp,cair)             | Sander et al. (2019)*                  |

Table 1: Gas phase reactions (... continued)

| #       | labels | reaction                                                                                       | rate coefficient                      | reference                                                                    |
|---------|--------|------------------------------------------------------------------------------------------------|---------------------------------------|------------------------------------------------------------------------------|
| G45122a | TrGC   | LISOPEFO2 + HO <sub>2</sub> → .7143 ISOPDOOH + .2857 ISOPBOOH                                  | k_R02_H02(temp,5)*(1.-r_CHOHCH202_OH) | Sander et al. (2019)                                                         |
| G45122b | TrGC   | LISOPEFO2 + HO <sub>2</sub> → LISOPEFO + OH                                                    | k_R02_H02(temp,5)*r_CHOHCH202_OH      | Sander et al. (2019)                                                         |
| G45123  | TrGCN  | LISOPEFO2 + NO <sub>3</sub> → LISOPEFO + NO <sub>2</sub>                                       | KR02N03                               | Sander et al. (2019)                                                         |
| G45124  | TrGC   | LISOPEFO2 → .7143 MACR + .2857 MVK + HCHO + OH                                                 | 0.7143*k_hsd+.2857*k_hsb              | Sander et al. (2019)                                                         |
| G45125  | TrGC   | LISOPEFO → .7143 MACR + .2857 MVK + HCHO + HO <sub>2</sub>                                     | KDEC                                  | Sander et al. (2019)                                                         |
| G45126a | TrGC   | LISOPACO → 3METHYLFURAN + HO <sub>2</sub>                                                      | KDEC*0.37                             | Sander et al. (2019), Paulot et al. (2009a), Francisco-Marquez et al. (2003) |
| G45126b | TrGC   | LISOPACO → .65 LHC4ACCHO + .65 HO <sub>2</sub> + .35 DB1O2                                     | KDEC*(1.-0.37)                        | Sander et al. (2019), Paulot et al. (2009a), Francisco-Marquez et al. (2003) |
| G45127a | TrGC   | LISOPACO → 3METHYLFURAN + HO <sub>2</sub>                                                      | KDEC*0.37                             | Sander et al. (2019), Paulot et al. (2009a), Francisco-Marquez et al. (2003) |
| G45127b | TrGC   | LISOPACO → .65 LHC4ACCHO + .65 HO <sub>2</sub> + .35 DB1O2                                     | KDEC*(1.-0.37)                        | Sander et al. (2019), Paulot et al. (2009a), Francisco-Marquez et al. (2003) |
| G45128  | TrGC   | 3METHYLFURAN + OH → L3METHYLFURANO2                                                            | 3.2E-11*EXP(310./temp)                | Sander et al. (2019)*                                                        |
| G45129  | TrGCN  | 3METHYLFURAN + NO <sub>3</sub> → L3METHYLFURANO2 + NO <sub>2</sub>                             | 1.9E-11                               | Sander et al. (2019), Atkinson et al. (2006)*                                |
| G45130  | TrGC   | L3METHYLFURANO2 → C4MDIAL + HO <sub>2</sub>                                                    | k1_R02s0R02                           | Sander et al. (2019)                                                         |
| G45131  | TrGCN  | L3METHYLFURANO2 + NO → C4MDIAL + HO <sub>2</sub> + NO <sub>2</sub>                             | KR02N0                                | Sander et al. (2019)*                                                        |
| G45132  | TrGC   | L3METHYLFURANO2 + HO <sub>2</sub> → C4MDIAL + HO <sub>2</sub>                                  | k_R02_H02(temp,5)                     | Sander et al. (2019)*                                                        |
| G45133  | TrGC   | LZCO3C23DBCOD → .62 EZCH3CO2CHCHO + .38 EZCHOCCH3CHO2 + CO <sub>2</sub>                        | k1_R02RC03                            | Sander et al. (2019)                                                         |
| G45134a | TrGC   | LZCO3C23DBCOD + HO <sub>2</sub> → .62 EZCH3CO2CHCHO + .38 EZCHOCCH3CHO2 + CO <sub>2</sub> + OH | KAPH02*r_C03_OH                       | Sander et al. (2019)                                                         |
| G45134b | TrGC   | LZCO3C23DBCOD + HO <sub>2</sub> → LZCO3HC23DBCOD                                               | KAPH02*(r_C03_00H+r_C03_03)           | Sander et al. (2019)*                                                        |
| G45135  | TrGCN  | LZCO3C23DBCOD + NO → .62 EZCH3CO2CHCHO + .38 EZCHOCCH3CHO2 + CO <sub>2</sub> + NO <sub>2</sub> | KAPN0                                 | Sander et al. (2019)                                                         |
| G45136  | TrGCN  | LZCO3C23DBCOD + NO <sub>2</sub> → LZCPANC23DBCOD                                               | k_CH3C03_N02                          | Rickard (2022)                                                               |

Table 1: Gas phase reactions (... continued)

| #       | labels   | reaction                                                                                                                                                                    | rate coefficient                                                  | reference                            |
|---------|----------|-----------------------------------------------------------------------------------------------------------------------------------------------------------------------------|-------------------------------------------------------------------|--------------------------------------|
| G45137  | TrGCN    | $\text{LZCO}_3\text{C}_{23}\text{DBCOD} + \text{NO}_3 \rightarrow .62 \text{EZCH}_3\text{CO}_2\text{CHCHO} + .38 \text{EZCHOCCH}_3\text{CHO}_2 + \text{CO}_2 + \text{NO}_2$ | $\text{KR02N03} \times 1.74$                                      | Sander et al. (2019)                 |
| G45138  | TrGCN    | $\text{LZCPANC}_{23}\text{DBCOD} \rightarrow \text{LZCO}_3\text{C}_{23}\text{DBCOD} + \text{NO}_2$                                                                          | $k_{\text{PAN\_M}}$                                               | Rickard (2022)                       |
| G45139  | TrGCN    | $\text{LZCPANC}_{23}\text{DBCOD} + \text{OH} \rightarrow .62 \text{EZCH}_3\text{CO}_2\text{CHCHO} + .38 \text{EZCHOCCH}_3\text{CHO}_2 + \text{CO}_2 + \text{NO}_2$          | $2.52\text{E}-11$                                                 | Sander et al. (2019)*                |
| G45200  | TrGTerC  | $\text{C}_{511}\text{O}_2 \rightarrow \text{CH}_3\text{C}(\text{O}) + \text{HCOCH}_2\text{CHO}$                                                                             | $k_{1\_R02s0R02}$                                                 | Rickard (2022)                       |
| G45201  | TrGTerCN | $\text{C}_{511}\text{O}_2 + \text{NO} \rightarrow \text{CH}_3\text{C}(\text{O}) + \text{HCOCH}_2\text{CHO} + \text{NO}_2$                                                   | $\text{KR02N0}$                                                   | Rickard (2022)*                      |
| G45202a | TrGTerC  | $\text{C}_{511}\text{O}_2 + \text{HO}_2 \rightarrow \text{C}_{511}\text{OOH}$                                                                                               | $k_{R02\_H02}(\text{temp}, 5) \times r_{\text{COCH202\_00H}}$     | Rickard (2022), Sander et al. (2019) |
| G45202b | TrGTerC  | $\text{C}_{511}\text{O}_2 + \text{HO}_2 \rightarrow \text{CH}_3\text{C}(\text{O}) + \text{HCOCH}_2\text{CHO} + \text{OH}$                                                   | $k_{R02\_H02}(\text{temp}, 5) \times r_{\text{COCH202\_OH}}$      | Rickard (2022), Sander et al. (2019) |
| G45203  | TrGTerC  | $\text{C}_{511}\text{OOH} + \text{OH} \rightarrow \text{C}_{511}\text{O}_2$                                                                                                 | $7.49\text{E}-11$                                                 | Rickard (2022)                       |
| G45204  | TrGTerC  | $\text{CO}_{23}\text{C}_4\text{CHO} + \text{OH} \rightarrow \text{CO}_{23}\text{C}_4\text{CO}_3$                                                                            | $6.65\text{E}-11$                                                 | Rickard (2022)                       |
| G45205  | TrGTerCN | $\text{CO}_{23}\text{C}_4\text{CHO} + \text{NO}_3 \rightarrow \text{CO}_{23}\text{C}_4\text{CO}_3 + \text{HNO}_3$                                                           | $\text{KN03AL} \times 5.5$                                        | Rickard (2022)                       |
| G45206  | TrGTerC  | $\text{CO}_{23}\text{C}_4\text{CO}_3 \rightarrow \text{CH}_3\text{COCOCH}_2\text{O}_2 + \text{CO}_2$                                                                        | $k_{1\_R02RC03}$                                                  | Rickard (2022)                       |
| G45207  | TrGTerCN | $\text{CO}_{23}\text{C}_4\text{CO}_3 + \text{NO} \rightarrow \text{CH}_3\text{COCOCH}_2\text{O}_2 + \text{CO}_2 + \text{NO}_2$                                              | $\text{KAPN0}$                                                    | Rickard (2022)*                      |
| G45208  | TrGTerCN | $\text{CO}_{23}\text{C}_4\text{CO}_3 + \text{NO}_2 \rightarrow \text{C}_{5\text{PAN}9}$                                                                                     | $k_{\text{CH3CO3\_N02}}$                                          | Rickard (2022)                       |
| G45209a | TrGTerC  | $\text{CO}_{23}\text{C}_4\text{CO}_3 + \text{HO}_2 \rightarrow \text{CO}_{23}\text{C}_4\text{CO}_3\text{H}$                                                                 | $\text{KAPH02} \times (r_{\text{C03\_00H}} + r_{\text{C03\_03}})$ | Rickard (2022)                       |
| G45209b | TrGTerC  | $\text{CO}_{23}\text{C}_4\text{CO}_3 + \text{HO}_2 \rightarrow \text{CH}_3\text{COCOCH}_2\text{O}_2 + \text{CO}_2 + \text{OH}$                                              | $\text{KAPH02} \times r_{\text{C03\_OH}}$                         | Rickard (2022)                       |
| G45210  | TrGTerCN | $\text{C}_{5\text{PAN}9} \rightarrow \text{CO}_{23}\text{C}_4\text{CO}_3 + \text{NO}_2$                                                                                     | $k_{\text{PAN\_M}}$                                               | Rickard (2022)                       |
| G45211  | TrGTerCN | $\text{C}_{5\text{PAN}9} + \text{OH} \rightarrow \text{CH}_3\text{COCOCHO} + \text{CO} + \text{NO}_2$                                                                       | $3.12\text{E}-13$                                                 | Rickard (2022)                       |
| G45212  | TrGTerC  | $\text{C}_{512}\text{O}_2 \rightarrow \text{C}_{513}\text{O}_2$                                                                                                             | $k_{1\_R02pR02}$                                                  | Rickard (2022)                       |
| G45213  | TrGTerC  | $\text{C}_{512}\text{O}_2 + \text{HO}_2 \rightarrow \text{C}_{512}\text{OOH}$                                                                                               | $k_{R02\_H02}(\text{temp}, 5)$                                    | Rickard (2022)                       |
| G45214  | TrGTerCN | $\text{C}_{512}\text{O}_2 + \text{NO} \rightarrow \text{C}_{513}\text{O}_2 + \text{NO}_2$                                                                                   | $\text{KR02N0}$                                                   | Rickard (2022)*                      |
| G45215  | TrGTerC  | $\text{C}_{512}\text{OOH} + \text{OH} \rightarrow \text{CO}_{13}\text{C}_4\text{CHO} + \text{OH}$                                                                           | $1.01\text{E}-10$                                                 | Rickard (2022)                       |
| G45216  | TrGTerC  | $\text{C}_{513}\text{O}_2 \rightarrow \text{GLYOX} + \text{HOC}_2\text{H}_4\text{CO}_3$                                                                                     | $k_{1\_R02s0R02}$                                                 | Rickard (2022)                       |
| G45217  | TrGTerCN | $\text{C}_{513}\text{O}_2 + \text{NO} \rightarrow \text{GLYOX} + \text{HOC}_2\text{H}_4\text{CO}_3 + \text{NO}_2$                                                           | $\text{KR02N0}$                                                   | Rickard (2022)*                      |
| G45218a | TrGTerC  | $\text{C}_{513}\text{O}_2 + \text{HO}_2 \rightarrow \text{C}_{513}\text{OOH}$                                                                                               | $k_{R02\_H02}(\text{temp}, 5) \times r_{\text{COCH202\_00H}}$     | Rickard (2022), Sander et al. (2019) |
| G45218b | TrGTerC  | $\text{C}_{513}\text{O}_2 + \text{HO}_2 \rightarrow \text{GLYOX} + \text{HOC}_2\text{H}_4\text{CO}_3 + \text{OH}$                                                           | $k_{R02\_H02}(\text{temp}, 5) \times r_{\text{COCH202\_OH}}$      | Rickard (2022), Sander et al. (2019) |
| G45219  | TrGTerC  | $\text{CO}_{13}\text{C}_4\text{CHO} + \text{OH} \rightarrow \text{CHOC}_3\text{COCO}_3$                                                                                     | $1.33\text{E}-10$                                                 | Rickard (2022)                       |
| G45220  | TrGTerCN | $\text{CO}_{13}\text{C}_4\text{CHO} + \text{NO}_3 \rightarrow \text{CHOC}_3\text{COCO}_3 + \text{HNO}_3$                                                                    | $2 \times \text{KN03AL} \times 5.5$                               | Rickard (2022)                       |
| G45221  | TrGTerC  | $\text{C}_{513}\text{OOH} + \text{OH} \rightarrow \text{C}_{513}\text{CO} + \text{OH}$                                                                                      | $9.23\text{E}-11$                                                 | Rickard (2022)                       |
| G45222  | TrGTerC  | $\text{CHOC}_3\text{COCO}_3 \rightarrow \text{CHOC}_3\text{COO}_2 + \text{CO}_2$                                                                                            | $k_{1\_R02RC03}$                                                  | Rickard (2022)                       |

Table 1: Gas phase reactions (... continued)

| #       | labels   | reaction                                                                                                                                              | rate coefficient                                                                        | reference                             |
|---------|----------|-------------------------------------------------------------------------------------------------------------------------------------------------------|-----------------------------------------------------------------------------------------|---------------------------------------|
| G45223  | TrGTerC  | $\text{CHOC3COCO3} + \text{HO}_2 \rightarrow \text{CHOC3COOOH}$                                                                                       | KAPH02                                                                                  | Rickard (2022)                        |
| G45224  | TrGTerCN | $\text{CHOC3COCO3} + \text{NO}_2 \rightarrow \text{CHOC3COPAN}$                                                                                       | k_CH3C03_N02                                                                            | Rickard (2022)                        |
| G45225  | TrGTerCN | $\text{CHOC3COCO3} + \text{NO} \rightarrow \text{CHOC3COO2} + \text{CO}_2 + \text{NO}_2$                                                              | KAPN0                                                                                   | Rickard (2022)*                       |
| G45226  | TrGTerC  | $\text{C513CO} + \text{OH} \rightarrow \text{HOC}_2\text{H}_4\text{CO}_3 + \text{CO} + \text{CO}$                                                     | 2.64E-11                                                                                | Rickard (2022)                        |
| G45227  | TrGTerC  | $\text{C514O2} + \text{HO}_2 \rightarrow \text{C514OOH}$                                                                                              | k_R02_H02(temp,5)                                                                       | Rickard (2022)                        |
| G45228a | TrGTerCN | $\text{C514O2} + \text{NO} \rightarrow \text{CO13C4CHO} + \text{HO}_2 + \text{NO}_2$                                                                  | KR02N0*(1.-alpha_AN(7,2,0,1,0, temp, cair))                                             | Rickard (2022), Sander et al. (2019)  |
| G45228b | TrGTerCN | $\text{C514O2} + \text{NO} \rightarrow \text{C514NO3}$                                                                                                | KR02N0*alpha_AN(7,2,0,1,0,temp, cair)                                                   | Rickard (2022), Sander et al. (2019)  |
| G45229  | TrGTerCN | $\text{C514O2} + \text{NO}_3 \rightarrow \text{CO13C4CHO} + \text{HO}_2 + \text{NO}_2$                                                                | KR02N03                                                                                 | Rickard (2022)                        |
| G45230  | TrGTerC  | $\text{C514O2} \rightarrow \text{CO13C4CHO} + \text{HO}_2$                                                                                            | k1_R02sR02                                                                              | Rickard (2022)                        |
| G45231  | TrGTerC  | $\text{C514OOH} + \text{OH} \rightarrow \text{CO13C4CHO} + \text{OH}$                                                                                 | 1.10E-10                                                                                | Rickard (2022)                        |
| G45232  | TrGTerCN | $\text{C514NO3} + \text{OH} \rightarrow \text{CO13C4CHO} + \text{NO}_2$                                                                               | 4.33E-11                                                                                | Rickard (2022)                        |
| G45233  | TrGTerC  | $\text{CHOC3COOOH} + \text{OH} \rightarrow \text{CHOC3COCO3}$                                                                                         | 7.55E-11                                                                                | Rickard (2022)                        |
| G45234  | TrGTerCN | $\text{CHOC3COPAN} \rightarrow \text{CHOC3COCO3} + \text{NO}_2$                                                                                       | k_PAN_M                                                                                 | Rickard (2022)                        |
| G45235  | TrGTerCN | $\text{CHOC3COPAN} + \text{OH} \rightarrow \text{C4CODIAL} + \text{CO} + \text{NO}_2$                                                                 | 7.19E-11                                                                                | Rickard (2022)                        |
| G45236  | TrGTerC  | $\text{MBO} + \text{OH} \rightarrow \text{LMBOABO2}$                                                                                                  | 8.1E-12*EXP(610./temp)                                                                  | Rickard (2022), Sander et al. (2019)* |
| G45237a | TrGTerC  | $\text{MBO} + \text{O}_3 \rightarrow \text{HCHO} + .16 \text{CH}_3\text{COCH}_3 + .16 \text{HO}_2 + .16 \text{CO} + .16 \text{OH} + .84 \text{MBOOO}$ | 1.0E-17*0.57                                                                            | Rickard (2022), Sander et al. (2019)  |
| G45237b | TrGTerC  | $\text{MBO} + \text{O}_3 \rightarrow \text{IBUTALOH} + .63 \text{CO} + .37 \text{HOCH}_2\text{OOH} + .16 \text{OH} + .16 \text{HO}_2$                 | 1.0E-17*0.43                                                                            | Rickard (2022), Sander et al. (2019)  |
| G45238  | TrGTerCN | $\text{MBO} + \text{NO}_3 \rightarrow \text{LNMBOABO2}$                                                                                               | 4.6E-14*EXP(-400./temp)                                                                 | Rickard (2022), Sander et al. (2019)  |
| G45239  | TrGTerC  | $\text{LMBOABO2} + \text{HO}_2 \rightarrow \text{LMBOABOOH}$                                                                                          | k_R02_H02(temp,5)                                                                       | Rickard (2022), Sander et al. (2019)  |
| G45240a | TrGTerCN | $\text{LMBOABO2} + \text{NO} \rightarrow \text{LMBOABNO3}$                                                                                            | KR02N0*(.67*alpha_AN(7,2,0,0,0, temp, cair)+.33*alpha_AN(7,1,0,0,0,temp, cair))         | Rickard (2022), Sander et al. (2019)  |
| G45240b | TrGTerCN | $\text{LMBOABO2} + \text{NO} \rightarrow \text{HOCH}_2\text{CHO} + \text{CH}_3\text{COCH}_3 + \text{HO}_2 + \text{NO}_2$                              | KR02N0*(1.-(.67*alpha_AN(7,2,0,0,0,temp, cair)+.33*alpha_AN(7,1,0,0,0,temp, cair)))*.67 | Rickard (2022), Sander et al. (2019)  |
| G45240c | TrGTerCN | $\text{LMBOABO2} + \text{NO} \rightarrow \text{IBUTALOH} + \text{HCHO} + \text{HO}_2 + \text{NO}_2$                                                   | KR02N0*(1.-(.67*alpha_AN(7,2,0,0,0,temp, cair)+.33*alpha_AN(7,1,0,0,0,temp, cair)))*.33 | Rickard (2022), Sander et al. (2019)  |



Table 1: Gas phase reactions (... continued)

| #       | labels   | reaction                                                                                                                                                                                                          | rate coefficient            | reference                             |
|---------|----------|-------------------------------------------------------------------------------------------------------------------------------------------------------------------------------------------------------------------|-----------------------------|---------------------------------------|
| G45241a | TrGTerC  | LMBOABO2 $\rightarrow$ HOCH <sub>2</sub> CHO + CH <sub>3</sub> COCH <sub>3</sub> + HO <sub>2</sub>                                                                                                                | k1_R02s0R02*.67             | Rickard (2022), Sander et al. (2019)  |
| G45241b | TrGTerC  | LMBOABO2 $\rightarrow$ IBUTALOH + HCHO + HO <sub>2</sub>                                                                                                                                                          | k1_R02p0R02*.33             | Rickard (2022), Sander et al. (2019)  |
| G45242a | TrGTerC  | LMBOABOOH + OH $\rightarrow$ MBOACO                                                                                                                                                                               | 0.67*2.93E-11+.33*2.05E-12  | Rickard (2022), Sander et al. (2019)  |
| G45242b | TrGTerC  | LMBOABOOH + OH $\rightarrow$ LMBOABO2                                                                                                                                                                             | k_R00HR0                    | Rickard (2022), Sander et al. (2019)  |
| G45243  | TrGTerCN | LMBOABNO3 + OH $\rightarrow$ MBOACO + NO <sub>2</sub>                                                                                                                                                             | 0.67*1.75E-12+.33*2.69E-12  | Rickard (2022), Sander et al. (2019)  |
| G45244  | TrGTerC  | MBOACO + OH $\rightarrow$ MBOCOCO + HO <sub>2</sub>                                                                                                                                                               | 3.79E-12                    | Rickard (2022)                        |
| G45245  | TrGTerC  | MBOCOCO + OH $\rightarrow$ CO + IPRHOCO3                                                                                                                                                                          | 1.38E-11                    | Rickard (2022)                        |
| G45246  | TrGTerCN | LNMBOABO2 + HO <sub>2</sub> $\rightarrow$ LNMBOABOOH                                                                                                                                                              | k_R02_H02(temp,5)           | Rickard (2022), Sander et al. (2019)  |
| G45247  | TrGTerCN | LNMBOABO2 + NO $\rightarrow$ .65 NO <sub>3</sub> CH <sub>2</sub> CHO + .65 CH <sub>3</sub> COCH <sub>3</sub> + .65 HO <sub>2</sub> + .35 IBUTALOH + .35 HCHO + .35 NO <sub>2</sub> + NO <sub>2</sub>              | KR02N0                      | Rickard (2022), Sander et al. (2019)* |
| G45248  | TrGTerCN | LNMBOABO2 + NO <sub>3</sub> $\rightarrow$ .65 NO <sub>3</sub> CH <sub>2</sub> CHO + .65 CH <sub>3</sub> COCH <sub>3</sub> + .65 HO <sub>2</sub> + .35 IBUTALOH + .35 HCHO + .35 NO <sub>2</sub> + NO <sub>2</sub> | KR02N03                     | Rickard (2022), Sander et al. (2019)  |
| G45249  | TrGTerCN | LNMBOABO2 $\rightarrow$ .65 NO <sub>3</sub> CH <sub>2</sub> CHO + .65 CH <sub>3</sub> COCH <sub>3</sub> + .65 HO <sub>2</sub> + .35 IBUTALOH + .35 HCHO + .35 NO <sub>2</sub>                                     | k1_R02s0R02                 | Rickard (2022), Sander et al. (2019)  |
| G45250a | TrGTerCN | LNMBOABOOH + OH $\rightarrow$ .65 C4MCONO3OH + .35 NMBOBCO                                                                                                                                                        | 0.65*4.89E-12+.35*2.52E-12  | Rickard (2022), Sander et al. (2019)  |
| G45250b | TrGTerCN | LNMBOABOOH + OH $\rightarrow$ LNMBOABO2                                                                                                                                                                           | k_R00HR0                    | Rickard (2022), Sander et al. (2019)  |
| G45251  | TrGTerCN | NMBOBCO + OH $\rightarrow$ NC4OHCO3                                                                                                                                                                               | 4.26E-12                    | Rickard (2022)                        |
| G45252a | TrGTerCN | NC4OHCO3 + HO <sub>2</sub> $\rightarrow$ IBUTALOH + CO <sub>2</sub> + NO <sub>2</sub> + OH                                                                                                                        | KAPH02*r_C03_OH             | Rickard (2022), Sander et al. (2019)  |
| G45252b | TrGTerCN | NC4OHCO3 + HO <sub>2</sub> $\rightarrow$ NC4OHCO3H                                                                                                                                                                | KAPH02*(r_C03_03+r_C03_00H) | Rickard (2022), Sander et al. (2019)  |
| G45253  | TrGTerCN | NC4OHCO3 + NO $\rightarrow$ IBUTALOH + CO <sub>2</sub> + NO <sub>2</sub> + NO <sub>2</sub>                                                                                                                        | KAPN0                       | Rickard (2022)                        |
| G45254  | TrGTerCN | NC4OHCO3 + NO <sub>2</sub> $\rightarrow$ NC4OHCPAN                                                                                                                                                                | k_CH3C03_N02                | Rickard (2022)                        |
| G45255  | TrGTerCN | NC4OHCO3 + NO <sub>3</sub> $\rightarrow$ IBUTALOH + CO <sub>2</sub> + NO <sub>2</sub> + NO <sub>2</sub>                                                                                                           | KR02N03*1.74                | Rickard (2022)                        |
| G45256  | TrGTerCN | NC4OHCO3 $\rightarrow$ IBUTALOH + CO <sub>2</sub> + NO <sub>2</sub>                                                                                                                                               | k1_R02RC03                  | Rickard (2022)                        |

Table 1: Gas phase reactions (... continued)

| #       | labels   | reaction                                                                                                            | rate coefficient                                   | reference                            |
|---------|----------|---------------------------------------------------------------------------------------------------------------------|----------------------------------------------------|--------------------------------------|
| G45257  | TrGTerCN | $\text{NC4OHCO3H} + \text{OH} \rightarrow \text{NC4OHCO3}$                                                          | 4.50E-12                                           | Rickard (2022)                       |
| G45258  | TrGTerCN | $\text{NC4OHCPAN} + \text{OH} \rightarrow \text{IBUTALOH} + \text{CO} + \text{NO}_2 + \text{NO}_2$                  | 1.27E-12                                           | Rickard (2022)                       |
| G45259  | TrGTerCN | $\text{NC4OHCPAN} \rightarrow \text{NC4OHCO3} + \text{NO}_2$                                                        | k_PAN_M                                            | Rickard (2022)                       |
| G45260  | TrGTerCN | $\text{C4MCONO3OH} + \text{OH} \rightarrow \text{CH}_3\text{COCH}_3 + \text{HCHO} + \text{CO}_2 + \text{NO}_2$      | 1.23E-12                                           | Rickard (2022), Sander et al. (2019) |
| G45400  | TrGAroCN | $\text{NC4MDCO2HN} + \text{OH} \rightarrow \text{MMALANHY} + \text{NO}_2$                                           | k_R00HRO                                           | Rickard (2022)*                      |
| G45401  | TrGAroCN | $\text{C54CO} + \text{NO}_3 \rightarrow 3 \text{CO} + \text{CH}_3\text{C(O)OO} + \text{HNO}_3$                      | KN03AL*5.5                                         | Rickard (2022)                       |
| G45402  | TrGAroC  | $\text{C54CO} + \text{OH} \rightarrow 3 \text{CO} + \text{CH}_3\text{C(O)OO}$                                       | 1.72E-11                                           | Rickard (2022)                       |
| G45403a | TrGAroCN | $\text{NTLFUO2} + \text{HO}_2 \rightarrow \text{NTLFUOOH}$                                                          | k_R02_H02(temp,5)*(1.-r_COCH202_OH)                | Rickard (2022)                       |
| G45403b | TrGAroCN | $\text{NTLFUO2} + \text{HO}_2 \rightarrow \text{ACCOMMECHO} + \text{NO}_2 + \text{OH}$                              | k_R02_H02(temp,5)*r_COCH202_OH                     | Rickard (2022)                       |
| G45404  | TrGAroCN | $\text{NTLFUO2} + \text{NO} \rightarrow \text{ACCOMMECHO} + \text{NO}_2 + \text{NO}_2$                              | KR02NO                                             | Rickard (2022)*                      |
| G45405  | TrGAroCN | $\text{NTLFUO2} + \text{NO}_3 \rightarrow \text{ACCOMMECHO} + \text{NO}_2 + \text{NO}_2$                            | KR02NO3                                            | Rickard (2022)*                      |
| G45406  | TrGAroCN | $\text{NTLFUO2} \rightarrow \text{ACCOMMECHO} + \text{NO}_2$                                                        | k1_R02tOR02                                        | Rickard (2022)*                      |
| G45407  | TrGAroC  | $\text{C5134CO2OH} + \text{OH} \rightarrow \text{C54CO} + \text{HO}_2$                                              | 7.48E-11                                           | Rickard (2022)                       |
| G45408  | TrGAroCN | $\text{C5COO2NO2} + \text{OH} \rightarrow \text{MGLYOX} + \text{CO} + \text{CO} + \text{NO}_2$                      | 5.43E-11                                           | Rickard (2022)                       |
| G45409  | TrGAroCN | $\text{C5COO2NO2} \rightarrow \text{C5CO14O2} + \text{NO}_2$                                                        | k_PAN_M                                            | Rickard (2022)*                      |
| G45410  | TrGAroC  | $\text{C5DIALOOH} + \text{OH} \rightarrow \text{C5DIALCO} + \text{OH}$                                              | 7.52E-11                                           | Rickard (2022)                       |
| G45411a | TrGAroC  | $\text{C4CO2DBC03} + \text{HO}_2 \rightarrow \text{C4CO2DCO3H}$                                                     | KAPH02*(r_C03_00H+r_C03_03)                        | Rickard (2022)                       |
| G45411b | TrGAroC  | $\text{C4CO2DBC03} + \text{HO}_2 \rightarrow \text{HO}_2 + \text{CO} + \text{HCOCOCHO} + \text{CO}_2 + \text{OH}$   | KAPH02*r_C03_OH                                    | Rickard (2022), Sander et al. (2019) |
| G45412  | TrGAroCN | $\text{C4CO2DBC03} + \text{NO} \rightarrow \text{HO}_2 + \text{CO} + \text{HCOCOCHO} + \text{CO}_2 + \text{NO}_2$   | KAPNO                                              | Rickard (2022)                       |
| G45413  | TrGAroCN | $\text{C4CO2DBC03} + \text{NO}_2 \rightarrow \text{C4CO2DBPAN}$                                                     | k_CH3C03_N02                                       | Rickard (2022)*                      |
| G45414  | TrGAroCN | $\text{C4CO2DBC03} + \text{NO}_3 \rightarrow \text{HO}_2 + \text{CO} + \text{HCOCOCHO} + \text{CO}_2 + \text{NO}_2$ | KR02NO3*1.74                                       | Rickard (2022)                       |
| G45415  | TrGAroC  | $\text{C4CO2DBC03} \rightarrow \text{HO}_2 + \text{CO} + \text{HCOCOCHO} + \text{CO}_2$                             | k1_R02RC03                                         | Rickard (2022)                       |
| G45416  | TrGAroC  | $\text{MMALANHY} + \text{OH} \rightarrow \text{MMALANHYO2}$                                                         | 1.50E-12                                           | Rickard (2022)                       |
| G45421a | TrGAroC  | $\text{MMALANHYO2} + \text{HO}_2 \rightarrow \text{MMALNHYOOH}$                                                     | k_R02_H02(temp,5)*(1.-r_COCH202_OH-r_CHOHCH202_OH) | Rickard (2022), Sander et al. (2019) |
| G45421b | TrGAroC  | $\text{MMALANHYO2} + \text{HO}_2 \rightarrow \text{CO2H3CO3} + \text{CO}_2 + \text{OH}$                             | k_R02_H02(temp,5)*(r_COCH202_OH+r_CHOHCH202_OH)    | Rickard (2022), Sander et al. (2019) |
| G45422  | TrGAroCN | $\text{MMALANHYO2} + \text{NO} \rightarrow \text{CO2H3CO3} + \text{CO}_2 + \text{NO}_2$                             | KR02NO                                             | Rickard (2022)*                      |
| G45423  | TrGAroCN | $\text{MMALANHYO2} + \text{NO}_3 \rightarrow \text{CO2H3CO3} + \text{CO}_2 + \text{NO}_2$                           | KR02NO3                                            | Rickard (2022)*                      |
| G45424  | TrGAroC  | $\text{MMALANHYO2} \rightarrow \text{CO2H3CO3} + \text{CO}_2$                                                       | k1_R02tOR02                                        | Rickard (2022)*                      |

Table 1: Gas phase reactions (... continued)

| #       | labels   | reaction                                                                                                                                                                                                                                                                                                                                                    | rate coefficient            | reference       |
|---------|----------|-------------------------------------------------------------------------------------------------------------------------------------------------------------------------------------------------------------------------------------------------------------------------------------------------------------------------------------------------------------|-----------------------------|-----------------|
| G45428  | TrGAroCN | $\text{C4CO2DBPAN} + \text{OH} \rightarrow \text{HCOCOCHO} + \text{CO}_2 + \text{CO} + \text{NO}_2$                                                                                                                                                                                                                                                         | 2.74E-11                    | Rickard (2022)  |
| G45429  | TrGAroCN | $\text{C4CO2DBPAN} \rightarrow \text{C4CO2DBC03} + \text{NO}_2$                                                                                                                                                                                                                                                                                             | k_PAN_M                     | Rickard (2022)* |
| G45430a | TrGAroC  | $\text{C5CO14O2} + \text{HO}_2 \rightarrow .83 \text{ MALANHY} + .83 \text{ CH}_3 + .17 \text{ MGLYOX} + .17 \text{ HO}_2 + .17 \text{ CO} + .17 \text{ CO}_2 + \text{OH}$                                                                                                                                                                                  | KAPH02*r_C03_OH             | Rickard (2022)* |
| G45430b | TrGAroC  | $\text{C5CO14O2} + \text{HO}_2 \rightarrow \text{C5CO14OH} + \text{O}_3$                                                                                                                                                                                                                                                                                    | KAPH02*r_C03_03             | Rickard (2022)  |
| G45430c | TrGAroC  | $\text{C5CO14O2} + \text{HO}_2 \rightarrow \text{C5CO14OOH}$                                                                                                                                                                                                                                                                                                | KAPH02*r_C03_00H            | Rickard (2022)  |
| G45431  | TrGAroCN | $\text{C5CO14O2} + \text{NO} \rightarrow .83 \text{ MALANHY} + .83 \text{ CH}_3 + .17 \text{ MGLYOX} + .17 \text{ HO}_2 + .17 \text{ CO} + .17 \text{ CO}_2 + \text{NO}_2$                                                                                                                                                                                  | KAPNO                       | Rickard (2022)* |
| G45432  | TrGAroCN | $\text{C5CO14O2} + \text{NO}_2 \rightarrow \text{C5COO2NO2}$                                                                                                                                                                                                                                                                                                | k_CH3C03_N02                | Rickard (2022)* |
| G45433  | TrGAroCN | $\text{C5CO14O2} + \text{NO}_3 \rightarrow .83 \text{ MALANHY} + .83 \text{ CH}_3 + .17 \text{ MGLYOX} + .17 \text{ HO}_2 + .17 \text{ CO} + .17 \text{ CO}_2 + \text{NO}_2$                                                                                                                                                                                | KR02N03*1.74                | Rickard (2022)* |
| G45434  | TrGAroC  | $\text{C5CO14O2} \rightarrow .83 \text{ MALANHY} + .83 \text{ CH}_3 + .17 \text{ MGLYOX} + .17 \text{ HO}_2 + .17 \text{ CO} + .17 \text{ CO}_2$                                                                                                                                                                                                            | k1_R02RC03                  | Rickard (2022)* |
| G45436  | TrGAroC  | $\text{C5CO14OH} + \text{OH} \rightarrow .83 \text{ MALANHY} + .83 \text{ CH}_3 + .17 \text{ MGLYOX} + .17 \text{ HO}_2 + .17 \text{ CO} + .17 \text{ CO}_2$                                                                                                                                                                                                | 5.44E-11                    | Rickard (2022)* |
| G45441  | TrGAroCN | $\text{C5DICARB} + \text{NO}_3 \rightarrow \text{C5CO14O2} + \text{HNO}_3$                                                                                                                                                                                                                                                                                  | KN03AL*2.75                 | Rickard (2022)  |
| G45442  | TrGAroC  | $\text{C5DICARB} + \text{O}_3 \rightarrow .5338 \text{ GLYOX} + .063 \text{ CH}_3\text{CHO} + .348 \text{ CH}_3\text{C(O)OO} + .918 \text{ CO} + .57 \text{ OH} + .473 \text{ HO}_2 + .0563 \text{ CH}_3\text{COCO}_2\text{H} + .5338 \text{ MGLYOX} + .676 \text{ H}_2\text{O}_2 + .063 \text{ HCHO} + .0563 \text{ HCOCO}_2\text{H} + .2465 \text{ CO}_2$ | 2.00E-18                    | Rickard (2022)  |
| G45443  | TrGAroC  | $\text{C5DICARB} + \text{OH} \rightarrow .48 \text{ C5CO14O2} + .52 \text{ C5DICARBO2}$                                                                                                                                                                                                                                                                     | 6.2E-11                     | Rickard (2022)  |
| G45444  | TrGAroC  | $\text{MC3ODBCO2H} + \text{OH} \rightarrow .35 \text{ GLYOX} + .35 \text{ CH}_3 + .35 \text{ CO} + .35 \text{ CO}_2 + .65 \text{ MMALANHY} + .65 \text{ HO}_2$                                                                                                                                                                                              | 4.38E-11                    | Rickard (2022)* |
| G45451  | TrGAroCN | $\text{TLFUONE} + \text{NO}_3 \rightarrow \text{NTLFUO2}$                                                                                                                                                                                                                                                                                                   | 1.00E-12                    | Rickard (2022)  |
| G45452  | TrGAroC  | $\text{TLFUONE} + \text{O}_3 \rightarrow .5 \text{ CO} + .5 \text{ OH} + .5 \text{ MECOACETO2} + .3125 \text{ C24O3CCO2H} + .1875 \text{ ACCOMECHO} + .1875 \text{ H}_2\text{O}_2$                                                                                                                                                                          | 8.00E-19                    | see note*       |
| G45453  | TrGAroC  | $\text{TLFUONE} + \text{OH} \rightarrow \text{TLFUO2}$                                                                                                                                                                                                                                                                                                      | 6.90E-11                    | Rickard (2022)  |
| G45454a | TrGAroC  | $\text{ACCOMECO3} + \text{HO}_2 \rightarrow \text{ACCOMECO3H}$                                                                                                                                                                                                                                                                                              | KAPH02*(r_C03_00H+r_C03_03) | Rickard (2022)  |
| G45454b | TrGAroC  | $\text{ACCOMECO3} + \text{HO}_2 \rightarrow \text{MECOACETO2} + \text{CO}_2 + \text{OH}$                                                                                                                                                                                                                                                                    | KAPH02*r_C03_OH             | Rickard (2022)  |
| G45455  | TrGAroCN | $\text{ACCOMECO3} + \text{NO} \rightarrow \text{MECOACETO2} + \text{CO}_2 + \text{NO}_2$                                                                                                                                                                                                                                                                    | KAPNO                       | Rickard (2022)  |
| G45456  | TrGAroCN | $\text{ACCOMECO3} + \text{NO}_2 \rightarrow \text{ACCOMEPAN}$                                                                                                                                                                                                                                                                                               | k_CH3C03_N02                | Rickard (2022)* |
| G45457  | TrGAroCN | $\text{ACCOMECO3} + \text{NO}_3 \rightarrow \text{MECOACETO2} + \text{CO}_2 + \text{NO}_2$                                                                                                                                                                                                                                                                  | KR02N03*1.74                | Rickard (2022)  |
| G45458  | TrGAroC  | $\text{ACCOMECO3} \rightarrow \text{MECOACETO2} + \text{CO}_2$                                                                                                                                                                                                                                                                                              | k1_R02RC03                  | Rickard (2022)  |

Table 1: Gas phase reactions (... continued)

| #       | labels   | reaction                                                                                               | rate coefficient                                                                                | reference       |
|---------|----------|--------------------------------------------------------------------------------------------------------|-------------------------------------------------------------------------------------------------|-----------------|
| G45459  | TrGAroC  | $\text{C4CO2DCO3H} + \text{OH} \rightarrow \text{C4CO2DBC03}$                                          | 3.06E-11                                                                                        | Rickard (2022)  |
| G45464  | TrGAroCN | $\text{ACCOMMECHO} + \text{NO}_3 \rightarrow \text{ACCOMECO3} + \text{HNO}_3$                          | KN03AL*5.5                                                                                      | Rickard (2022)  |
| G45465  | TrGAroC  | $\text{ACCOMMECHO} + \text{OH} \rightarrow \text{ACCOMECO3}$                                           | 7.09E-11                                                                                        | Rickard (2022)  |
| G45466  | TrGAroC  | $\text{MMALNHYOOH} + \text{OH} \rightarrow \text{MMALANHYO2}$                                          | 1.69E-11                                                                                        | Rickard (2022)  |
| G45467a | TrGAroC  | $\text{C5DICAROOH} + \text{OH} \rightarrow \text{C5134CO2OH} + \text{OH}$                              | 1.21E-10                                                                                        | Rickard (2022)  |
| G45467b | TrGAroC  | $\text{C5DICAROOH} + \text{OH} \rightarrow \text{C5DICARBO2}$                                          | k_R00HR0                                                                                        | Rickard (2022)  |
| G45468  | TrGAroC  | $\text{C24O3CCO2H} + \text{OH} \rightarrow \text{MECOACETO2} + \text{CO}_2$                            | 8.76E-13                                                                                        | Rickard (2022)  |
| G45469  | TrGAroCN | $\text{NTLFUOOH} + \text{OH} \rightarrow \text{NTLFUO2}$                                               | 4.44E-12                                                                                        | Rickard (2022)  |
| G45470  | TrGAroCN | $\text{ACCOMEPAN} + \text{OH} \rightarrow \text{METACETHO} + \text{CO} + \text{CO} + \text{NO}_2$      | 1.00E-14                                                                                        | Rickard (2022)  |
| G45471  | TrGAroCN | $\text{ACCOMEPAN} \rightarrow \text{ACCOMECO3} + \text{NO}_2$                                          | k_PAN_M                                                                                         | Rickard (2022)  |
| G45476a | TrGAroC  | $\text{TLFUO2} + \text{HO}_2 \rightarrow \text{TLFUOOH}$                                               | $k_{\text{R02\_H02}}(\text{temp}, 5) * (1 - r_{\text{COCH202\_OH}} - r_{\text{CHOHCH202\_OH}})$ | Rickard (2022)  |
| G45476b | TrGAroC  | $\text{TLFUO2} + \text{HO}_2 \rightarrow \text{ACCOMMECHO} + \text{HO}_2 + \text{OH}$                  | $k_{\text{R02\_H02}}(\text{temp}, 5) * (r_{\text{COCH202\_OH}} + r_{\text{CHOHCH202\_OH}})$     | Rickard (2022)* |
| G45477  | TrGAroCN | $\text{TLFUO2} + \text{NO} \rightarrow \text{ACCOMMECHO} + \text{HO}_2 + \text{NO}_2$                  | KR02N0                                                                                          | Rickard (2022)* |
| G45478  | TrGAroCN | $\text{TLFUO2} + \text{NO}_3 \rightarrow \text{ACCOMMECHO} + \text{HO}_2 + \text{NO}_2$                | KR02N03                                                                                         | Rickard (2022)* |
| G45479  | TrGAroC  | $\text{TLFUO2} \rightarrow \text{ACCOMMECHO} + \text{HO}_2$                                            | k1_R02t0R02                                                                                     | Rickard (2022)* |
| G45480  | TrGAroC  | $\text{C5CO14OOH} + \text{OH} \rightarrow \text{C5CO14O2}$                                             | 3.59E-12                                                                                        | Rickard (2022)  |
| G45483  | TrGAroC  | $\text{TLFUOOH} + \text{OH} \rightarrow \text{TLFUO2}$                                                 | 2.53E-11                                                                                        | Rickard (2022)  |
| G45485  | TrGAroC  | $\text{ACCOMECO3H} + \text{OH} \rightarrow \text{ACCOMECO3}$                                           | 3.59E-12                                                                                        | Rickard (2022)  |
| G45486a | TrGAroC  | $\text{C5DIALO2} + \text{HO}_2 \rightarrow \text{C5DIALOOH}$                                           | $k_{\text{R02\_H02}}(\text{temp}, 5) * (1 - r_{\text{COCH202\_OH}})$                            | Rickard (2022)  |
| G45486b | TrGAroC  | $\text{C5DIALO2} + \text{HO}_2 \rightarrow \text{MALDIAL} + \text{CO} + \text{HO}_2 + \text{OH}$       | $k_{\text{R02\_H02}}(\text{temp}, 5) * r_{\text{COCH202\_OH}}$                                  | Rickard (2022)* |
| G45487  | TrGAroCN | $\text{C5DIALO2} + \text{NO} \rightarrow \text{MALDIAL} + \text{CO} + \text{HO}_2 + \text{NO}_2$       | KR02N0                                                                                          | Rickard (2022)* |
| G45488  | TrGAroCN | $\text{C5DIALO2} + \text{NO}_3 \rightarrow \text{MALDIAL} + \text{CO} + \text{HO}_2 + \text{NO}_2$     | KR02N03                                                                                         | Rickard (2022)* |
| G45489  | TrGAroC  | $\text{C5DIALO2} \rightarrow \text{MALDIAL} + \text{CO} + \text{HO}_2$                                 | k1_R02s0R02                                                                                     | Rickard (2022)* |
| G45490a | TrGAroC  | $\text{C5DICARBO2} + \text{HO}_2 \rightarrow \text{C5DICAROOH}$                                        | $k_{\text{R02\_H02}}(\text{temp}, 5) * (r_{\text{C03\_00H}} + r_{\text{C03\_03}})$              | Rickard (2022)  |
| G45491b | TrGAroC  | $\text{C5DICARBO2} + \text{HO}_2 \rightarrow \text{MGLYOX} + \text{GLYOX} + \text{HO}_2 + \text{OH}$   | $k_{\text{R02\_H02}}(\text{temp}, 5) * r_{\text{C03\_OH}}$                                      | Rickard (2022)* |
| G45492  | TrGAroCN | $\text{C5DICARBO2} + \text{NO} \rightarrow \text{MGLYOX} + \text{GLYOX} + \text{HO}_2 + \text{NO}_2$   | KR02N0                                                                                          | Rickard (2022)* |
| G45493  | TrGAroCN | $\text{C5DICARBO2} + \text{NO}_3 \rightarrow \text{MGLYOX} + \text{GLYOX} + \text{HO}_2 + \text{NO}_2$ | KR02N03                                                                                         | Rickard (2022)* |

Table 1: Gas phase reactions (... continued)

| #       | labels   | reaction                                                                                                   | rate coefficient                                                  | reference                            |
|---------|----------|------------------------------------------------------------------------------------------------------------|-------------------------------------------------------------------|--------------------------------------|
| G45494  | TrGAroC  | $\text{C5DICARBO2} \rightarrow \text{MGLYOX} + \text{GLYOX} + \text{HO}_2$                                 | $k_{1\_R02sOR02}$                                                 | Rickard (2022)*                      |
| G46200a | TrGTerC  | $\text{CO235C6O2} + \text{HO}_2 \rightarrow \text{CO235C6OOH}$                                             | $k_{R02\_H02(\text{temp},6)*r\_COCH202\_00H}$                     | Rickard (2022), Sander et al. (2019) |
| G46200b | TrGTerC  | $\text{CO235C6O2} + \text{HO}_2 \rightarrow \text{CO23C4CO3} + \text{HCHO} + \text{OH}$                    | $k_{R02\_H02(\text{temp},6)*r\_COCH202\_0H}$                      | Rickard (2022), Sander et al. (2019) |
| G46201  | TrGTerCN | $\text{CO235C6O2} + \text{NO} \rightarrow \text{CO23C4CO3} + \text{HCHO} + \text{NO}_2$                    | $K_{R02N0}$                                                       | Rickard (2022)*                      |
| G46202  | TrGTerC  | $\text{CO235C6O2} \rightarrow \text{CO23C4CO3} + \text{HCHO}$                                              | $k_{1\_R02pOR02}$                                                 | Rickard (2022)                       |
| G46203  | TrGTerC  | $\text{CO235C6OOH} + \text{OH} \rightarrow \text{CO235C6O2}$                                               | $1.01\text{E}-11$                                                 | Rickard (2022)                       |
| G46204  | TrGTerC  | $\text{C614O2} \rightarrow \text{CO23C4CHO} + \text{HCHO} + \text{HO}_2$                                   | $k_{1\_R02sOR02}$                                                 | Rickard (2022)                       |
| G46205a | TrGTerCN | $\text{C614O2} + \text{NO} \rightarrow \text{CO23C4CHO} + \text{HCHO} + \text{HO}_2 + \text{NO}_2$         | $K_{R02N0}*(1.-\alpha_{AN}(9,2,0,1,0, \text{temp}, \text{cair}))$ | Rickard (2022)                       |
| G46205b | TrGTerCN | $\text{C614O2} + \text{NO} \rightarrow \text{C614NO3}$                                                     | $K_{R02N0}*\alpha_{AN}(9,2,0,1,0, \text{temp}, \text{cair})$      | Rickard (2022)                       |
| G46206a | TrGTerC  | $\text{C614O2} + \text{HO}_2 \rightarrow \text{C614OOH}$                                                   | $k_{R02\_H02(\text{temp},6)*(1.-r\_CHOHCH202\_0H)}$               | Rickard (2022), Sander et al. (2019) |
| G46206b | TrGTerC  | $\text{C614O2} + \text{HO}_2 \rightarrow \text{CO23C4CHO} + \text{HCHO} + \text{HO}_2 + \text{OH}$         | $k_{R02\_H02(\text{temp},6)*r\_CHOHCH202\_0H}$                    | Rickard (2022), Sander et al. (2019) |
| G46207  | TrGTerCN | $\text{C614NO3} + \text{OH} \rightarrow \text{C614CO} + \text{NO}_2$                                       | $7.11\text{E}-12$                                                 | Rickard (2022)                       |
| G46208  | TrGTerC  | $\text{C614OOH} + \text{OH} \rightarrow \text{C614CO} + \text{OH}$                                         | $8.69\text{E}-11$                                                 | Rickard (2022)                       |
| G46209  | TrGTerC  | $\text{C614CO} + \text{OH} \rightarrow \text{CO235C5CHO} + \text{HO}_2$                                    | $3.22\text{E}-12$                                                 | Rickard (2022)                       |
| G46210  | TrGTerC  | $\text{CO235C5CHO} + \text{OH} \rightarrow \text{CO23C4CO3} + \text{CO}$                                   | $1.33\text{E}-11$                                                 | Rickard (2022)                       |
| G46211  | TrGTerCN | $\text{CO235C5CHO} + \text{NO}_3 \rightarrow \text{CO23C4CO3} + \text{CO} + \text{HNO}_3$                  | $K_{N03AL}*5.5$                                                   | Rickard (2022)                       |
| G46400  | TrGAroC  | $\text{PHENO0H} + \text{OH} \rightarrow \text{PHENO2}$                                                     | $1.16\text{E}-10$                                                 | Rickard (2022)                       |
| G46401  | TrGAroC  | $\text{C6CO4DB} + \text{OH} \rightarrow \text{CO} + \text{CO} + \text{HO}_2 + \text{CO} + \text{HCOCOCHO}$ | $7.70\text{E}-11$                                                 | Rickard (2022)                       |
| G46402  | TrGAroC  | $\text{C5CO2DCO3H} + \text{OH} \rightarrow \text{C5CO2DBCO3}$                                              | $3.60\text{E}-11$                                                 | Rickard (2022)                       |
| G46403  | TrGAroCN | $\text{NDNPHENO0H} + \text{OH} \rightarrow \text{NDNPHENO2}$                                               | $k_{R00HR0}$                                                      | Rickard (2022)                       |
| G46404a | TrGAroC  | $\text{C615CO2O2} + \text{HO}_2 \rightarrow \text{C615CO2OOH}$                                             | $k_{R02\_H02(\text{temp},6)*(1.-r\_COCH202\_0H)}$                 | Rickard (2022)                       |
| G46404b | TrGAroC  | $\text{C615CO2O2} + \text{HO}_2 \rightarrow \text{C5DICARB} + \text{CO} + \text{HO}_2 + \text{OH}$         | $k_{R02\_H02(\text{temp},6)*r\_COCH202\_0H}$                      | Rickard (2022)*                      |
| G46405  | TrGAroCN | $\text{C615CO2O2} + \text{NO} \rightarrow \text{C5DICARB} + \text{CO} + \text{HO}_2 + \text{NO}_2$         | $K_{R02N0}$                                                       | Rickard (2022)*                      |
| G46406  | TrGAroCN | $\text{C615CO2O2} + \text{NO}_3 \rightarrow \text{C5DICARB} + \text{CO} + \text{HO}_2 + \text{NO}_2$       | $K_{R02N03}$                                                      | Rickard (2022)*                      |
| G46407  | TrGAroC  | $\text{C615CO2O2} \rightarrow \text{C5DICARB} + \text{CO} + \text{HO}_2$                                   | $k_{1\_R02sOR02}$                                                 | Rickard (2022)*                      |
| G46408  | TrGAroCN | $\text{BZEMUCPAN} + \text{OH} \rightarrow \text{MALDIAL} + \text{CO} + \text{CO}_2 + \text{NO}_2$          | $4.05\text{E}-11$                                                 | Rickard (2022)                       |
| G46409  | TrGAroCN | $\text{BZEMUCPAN} \rightarrow \text{BZEMUCCO3} + \text{NO}_2$                                              | $k_{PAN\_M}$                                                      | Rickard (2022)                       |

Table 1: Gas phase reactions (... continued)

| #       | labels   | reaction                                                                                                                                                                                                  | rate coefficient                          | reference       |
|---------|----------|-----------------------------------------------------------------------------------------------------------------------------------------------------------------------------------------------------------|-------------------------------------------|-----------------|
| G46410  | TrGAroCN | BZBIPERNO3 + OH → BZOBIPEROH + NO <sub>2</sub>                                                                                                                                                            | 7.30E-11                                  | Rickard (2022)  |
| G46411  | TrGAroCN | HOC6H4NO2 + NO <sub>3</sub> → NPHEN1O + HNO <sub>3</sub>                                                                                                                                                  | 9.00E-14                                  | Rickard (2022)  |
| G46412  | TrGAroCN | HOC6H4NO2 + OH → NPHEN1O                                                                                                                                                                                  | 9.00E-13                                  | Rickard (2022)  |
| G46413a | TrGAroCN | NDNPHENO2 + HO <sub>2</sub> → NDNPHENOOH                                                                                                                                                                  | k_R02_H02(temp,6)*(1.-r_<br>CHOHCH202_OH) | Rickard (2022)  |
| G46413b | TrGAroCN | NDNPHENO2 + HO <sub>2</sub> → NC4DCO2H + HNO <sub>3</sub> + CO +<br>CO + NO <sub>2</sub> + OH                                                                                                             | k_R02_H02(temp,6)*r_CHOHCH202_OH          | Rickard (2022)* |
| G46414  | TrGAroCN | NDNPHENO2 + NO → NC4DCO2H + HNO <sub>3</sub> + CO +<br>CO + NO <sub>2</sub> + NO <sub>2</sub>                                                                                                             | KR02N0                                    | Rickard (2022)* |
| G46415  | TrGAroCN | NDNPHENO2 + NO <sub>3</sub> → NC4DCO2H + HNO <sub>3</sub> + CO +<br>CO + NO <sub>2</sub> + NO <sub>2</sub>                                                                                                | KR02N03                                   | Rickard (2022)* |
| G46416  | TrGAroCN | NDNPHENO2 → NC4DCO2H + HNO <sub>3</sub> + CO + CO +<br>NO <sub>2</sub>                                                                                                                                    | k1_R02IS0PD02                             | Rickard (2022)* |
| G46417  | TrGAroC  | PBZQCO + OH → C5CO2OHCO3                                                                                                                                                                                  | 6.07E-11                                  | Rickard (2022)  |
| G46418  | TrGAroCN | CATECHOL + NO <sub>3</sub> → CATEC1O + HNO <sub>3</sub>                                                                                                                                                   | 9.9E-11                                   | Rickard (2022)* |
| G46419  | TrGAroC  | CATECHOL + O <sub>3</sub> → MALDALCO2H + HCOCO <sub>2</sub> H +<br>HO <sub>2</sub> + OH                                                                                                                   | 9.2E-18                                   | Rickard (2022)  |
| G46420  | TrGAroC  | CATECHOL + OH → CATEC1O                                                                                                                                                                                   | 1.0E-10                                   | Rickard (2022)  |
| G46421  | TrGAroC  | C5COOHCO3H + OH → C5CO2OHCO3                                                                                                                                                                              | 8.01E-11                                  | Rickard (2022)  |
| G46422  | TrGAroCN | NCATECHOL + NO <sub>3</sub> → NNCATECO2                                                                                                                                                                   | 2.60E-12                                  | Rickard (2022)  |
| G46423  | TrGAroCN | NCATECHOL + OH → NCATECO2                                                                                                                                                                                 | 3.47E-12                                  | Rickard (2022)  |
| G46424a | TrGAroC  | C5CO2OHCO3 + HO <sub>2</sub> → C5COOHCO3H                                                                                                                                                                 | KAPH02*(r_C03_00H+r_C03_03)               | Rickard (2022)  |
| G46424b | TrGAroC  | C5CO2OHCO3 + HO <sub>2</sub> → HOCOC4DIAL + HO <sub>2</sub> + CO +<br>CO <sub>2</sub> + OH                                                                                                                | KAPH02*r_C03_OH                           | Rickard (2022)  |
| G46425  | TrGAroCN | C5CO2OHCO3 + NO → HOCOC4DIAL + HO <sub>2</sub> + CO +<br>CO <sub>2</sub> + NO <sub>2</sub>                                                                                                                | KAPN0                                     | Rickard (2022)  |
| G46426  | TrGAroCN | C5CO2OHCO3 + NO <sub>2</sub> → C5CO2OHPAN                                                                                                                                                                 | k_CH3C03_N02                              | Rickard (2022)* |
| G46427  | TrGAroCN | C5CO2OHCO3 + NO <sub>3</sub> → HOCOC4DIAL + HO <sub>2</sub> + CO +<br>CO <sub>2</sub> + NO <sub>2</sub>                                                                                                   | KR02N03*1.74                              | Rickard (2022)  |
| G46428  | TrGAroC  | C5CO2OHCO3 → HOCOC4DIAL + HO <sub>2</sub> + CO + CO <sub>2</sub>                                                                                                                                          | k1_R02RC03                                | Rickard (2022)  |
| G46429  | TrGAroCN | BZEPOXMUC + NO <sub>3</sub> → BZEMUCCO3 + HNO <sub>3</sub>                                                                                                                                                | 2.*KN03AL*2.75                            | Rickard (2022)  |
| G46430  | TrGAroC  | BZEPOXMUC + O <sub>3</sub> → EPXC4DIAL + .125 HCHO +<br>.1125 HCOCO <sub>2</sub> H + .0675 GLYOX + .0675 H <sub>2</sub> O <sub>2</sub> + .82<br>HO <sub>2</sub> + .57 OH + 1.265 CO + .25 CO <sub>2</sub> | 2.00E-18                                  | Rickard (2022)* |

Table 1: Gas phase reactions (... continued)

| #       | labels   | reaction                                                                                                             | rate coefficient                      | reference                           |
|---------|----------|----------------------------------------------------------------------------------------------------------------------|---------------------------------------|-------------------------------------|
| G46431  | TrGAroC  | BZEPOXMUC + OH $\rightarrow$ .31 BZEMUCCO3 + .69 BZEMUCO2                                                            | 6.08E-11                              | Rickard (2022)                      |
| G46432a | TrGAroCN | NCATECO2 + HO <sub>2</sub> $\rightarrow$ NCATECOOH                                                                   | k_R02_H02(temp,6)*(1.-r_CHOHCH202_OH) | Rickard (2022)                      |
| G46432b | TrGAroCN | NCATECO2 + HO <sub>2</sub> $\rightarrow$ NC4DCO2H + HCOCO <sub>2</sub> H + HO <sub>2</sub> + OH                      | k_R02_H02(temp,6)*r_CHOHCH202_OH      | Rickard (2022)*                     |
| G46433  | TrGAroCN | NCATECO2 + NO $\rightarrow$ NC4DCO2H + HCOCO <sub>2</sub> H + HO <sub>2</sub> + NO <sub>2</sub>                      | KR02N0                                | Rickard (2022)*                     |
| G46434  | TrGAroCN | NCATECO2 + NO <sub>3</sub> $\rightarrow$ NC4DCO2H + HCOCO <sub>2</sub> H + HO <sub>2</sub> + NO <sub>2</sub>         | KR02N03                               | Rickard (2022)*                     |
| G46435  | TrGAroCN | NCATECO2 $\rightarrow$ NC4DCO2H + HCOCO <sub>2</sub> H + HO <sub>2</sub>                                             | k1_R02IS0PD02                         | Rickard (2022)*                     |
| G46436  | TrGAroCN | NPHEN1OOH + OH $\rightarrow$ NPHEN1O2                                                                                | 9.00E-13                              | Rickard (2022)                      |
| G46437a | TrGAroCN | NPHENO2 + HO <sub>2</sub> $\rightarrow$ NPHENOOH                                                                     | k_R02_H02(temp,6)*(1.-r_CHOHCH202_OH) | Rickard (2022)                      |
| G46437b | TrGAroCN | NPHENO2 + HO <sub>2</sub> $\rightarrow$ MALDALCO2H + GLYOX + NO <sub>2</sub> + OH                                    | k_R02_H02(temp,6)*r_CHOHCH202_OH      | Rickard (2022)*                     |
| G46438  | TrGAroCN | NPHENO2 + NO $\rightarrow$ MALDALCO2H + GLYOX + NO <sub>2</sub> + NO <sub>2</sub>                                    | KR02N0                                | Rickard (2022)*                     |
| G46439  | TrGAroCN | NPHENO2 + NO <sub>3</sub> $\rightarrow$ MALDALCO2H + GLYOX + NO <sub>2</sub> + NO <sub>2</sub>                       | KR02N03                               | Rickard (2022)*                     |
| G46440  | TrGAroCN | NPHENO2 $\rightarrow$ MALDALCO2H + GLYOX + NO <sub>2</sub>                                                           | k1_R02IS0PD02                         | Rickard (2022)*                     |
| G46441  | TrGAroC  | BENZENE + OH $\rightarrow$ .352 BZBIPERO2 + .118 BZEPOXMUC + .118 HO <sub>2</sub> + .53 PHENOL + .53 HO <sub>2</sub> | 2.3E-12*EXP(-190./temp)               | Rickard (2022)*                     |
| G46442  | TrGAroCN | C5CO2OHPAN + OH $\rightarrow$ HOCOC4DIAL + CO + CO + NO <sub>2</sub>                                                 | 7.66E-11                              | Rickard (2022)                      |
| G46443  | TrGAroCN | C5CO2OHPAN $\rightarrow$ C5CO2OHCO3 + NO <sub>2</sub>                                                                | k_PAN_M                               | Rickard (2022)                      |
| G46444  | TrGAroCN | CATEC1O + NO <sub>2</sub> $\rightarrow$ NCATECHOL                                                                    | k_C6H50_N02                           | Rickard (2022), Platz et al. (1998) |
| G46445  | TrGAroC  | CATEC1O + O <sub>3</sub> $\rightarrow$ CATEC1O2                                                                      | k_C6H50_O3                            | Rickard (2022), Tao and Li (1999)   |
| G46446  | TrGAroC  | BZEMUCCO + OH $\rightarrow$ EPXDLCO3 + GLYOX                                                                         | 9.20E-11                              | Rickard (2022)                      |
| G46447a | TrGAroCN | NNCATECO2 + HO <sub>2</sub> $\rightarrow$ NNCATECOOH                                                                 | k_R02_H02(temp,6)*(1.-r_CHOHCH202_OH) | Rickard (2022)                      |
| G46447b | TrGAroCN | NNCATECO2 + HO <sub>2</sub> $\rightarrow$ NC4DCO2H + HCOCO <sub>2</sub> H + NO <sub>2</sub> + OH                     | k_R02_H02(temp,6)*r_CHOHCH202_OH      | Rickard (2022)*                     |

Table 1: Gas phase reactions (... continued)

| #       | labels   | reaction                                                                                                                                        | rate coefficient                     | reference                           |
|---------|----------|-------------------------------------------------------------------------------------------------------------------------------------------------|--------------------------------------|-------------------------------------|
| G46448  | TrGAroCN | $\text{NNCATECO}_2 + \text{NO} \rightarrow \text{NC}_4\text{DCO}_2\text{H} + \text{HCOCO}_2\text{H} + \text{NO}_2$                              | KR02N0                               | Rickard (2022)*                     |
| G46449  | TrGAroCN | $\text{NNCATECO}_2 + \text{NO}_3 \rightarrow \text{NC}_4\text{DCO}_2\text{H} + \text{HCOCO}_2\text{H} + \text{NO}_2 + \text{NO}_2$              | KR02N03                              | Rickard (2022)*                     |
| G46450  | TrGAroCN | $\text{NNCATECO}_2 \rightarrow \text{NC}_4\text{DCO}_2\text{H} + \text{HCOCO}_2\text{H} + \text{NO}_2$                                          | k1_R02IS0PD02                        | Rickard (2022)*                     |
| G46451  | TrGAroC  | $\text{BZEMUCCO}_2\text{H} + \text{OH} \rightarrow \text{C}_5\text{DIALO}_2 + \text{CO}_2$                                                      | 4.06E-11                             | Rickard (2022)                      |
| G46452  | TrGAroCN | $\text{NNCATECOOH} + \text{OH} \rightarrow \text{NNCATECO}_2$                                                                                   | k_R00HR0                             | Rickard (2022)                      |
| G46453  | TrGAroCN | $\text{NPHEN1O} + \text{NO}_2 \rightarrow \text{DNPHEN}$                                                                                        | k_C6H50_N02                          | Rickard (2022), Platz et al. (1998) |
| G46454  | TrGAroCN | $\text{NPHEN1O} + \text{O}_3 \rightarrow \text{NPHEN1O}_2$                                                                                      | k_C6H50_03                           | Rickard (2022), Tao and Li (1999)   |
| G46455  | TrGAroCN | $\text{DNPHEN} + \text{NO}_3 \rightarrow \text{NDNPHENO}_2$                                                                                     | 2.25E-15                             | Rickard (2022)                      |
| G46456  | TrGAroCN | $\text{DNPHEN} + \text{OH} \rightarrow \text{DNPHENO}_2$                                                                                        | 3.00E-14                             | Rickard (2022)                      |
| G46457  | TrGAroCN | $\text{PHENOL} + \text{NO}_3 \rightarrow .742 \text{ C}_6\text{H}_5\text{O} + .742 \text{ HNO}_3 + .258 \text{ NPHENO}_2$                       | 3.8E-12                              | Rickard (2022)*                     |
| G46458  | TrGAroC  | $\text{PHENOL} + \text{OH} \rightarrow .06 \text{ C}_6\text{H}_5\text{O} + .8 \text{ CATECHOL} + .8 \text{ HO}_2 + .14 \text{ PHENO}_2$         | 4.7E-13*EXP(1220./temp)              | Rickard (2022)*                     |
| G46459  | TrGAroCN | $\text{PBZQONE} + \text{NO}_3 \rightarrow \text{NBZQO}_2$                                                                                       | 3.00E-13                             | Rickard (2022)                      |
| G46460  | TrGAroC  | $\text{PBZQONE} + \text{OH} \rightarrow \text{PBZQO}_2$                                                                                         | 4.6E-12                              | Rickard (2022)                      |
| G46461a | TrGAroC  | $\text{PHENO}_2 + \text{HO}_2 \rightarrow \text{PHENOOH}$                                                                                       | k_R02_H02(temp,6)*(1.-r_CHOCH202_OH) | Rickard (2022)                      |
| G46461b | TrGAroC  | $\text{PHENO}_2 + \text{HO}_2 \rightarrow .71 \text{ MALDALCO}_2\text{H} + .71 \text{ GLYOX} + .29 \text{ PBZQONE} + \text{HO}_2 + \text{OH}$   | k_R02_H02(temp,6)*r_CHOCH202_OH      | Rickard (2022)*                     |
| G46462  | TrGAroCN | $\text{PHENO}_2 + \text{NO} \rightarrow .71 \text{ MALDALCO}_2\text{H} + .71 \text{ GLYOX} + .29 \text{ PBZQONE} + \text{HO}_2 + \text{NO}_2$   | KR02N0                               | Rickard (2022)*                     |
| G46463  | TrGAroCN | $\text{PHENO}_2 + \text{NO}_3 \rightarrow .71 \text{ MALDALCO}_2\text{H} + .71 \text{ GLYOX} + .29 \text{ PBZQONE} + \text{HO}_2 + \text{NO}_2$ | KR02N03                              | Rickard (2022)*                     |
| G46464  | TrGAroC  | $\text{PHENO}_2 \rightarrow .71 \text{ MALDALCO}_2\text{H} + .71 \text{ GLYOX} + .29 \text{ PBZQONE} + \text{HO}_2$                             | k1_R02IS0PD02                        | Rickard (2022)*                     |
| G46465  | TrGAroC  | $\text{C}_6\text{H}_5\text{CO}_2\text{OOH} + \text{OH} \rightarrow \text{C}_6\text{H}_5\text{CO} + \text{OH}$                                   | 9.42E-11                             | Rickard (2022)                      |
| G46466a | TrGAroC  | $\text{C}_5\text{CO}_2\text{DBCO}_3 + \text{HO}_2 \rightarrow \text{C}_5\text{CO}_2\text{DCO}_3\text{H}$                                        | KAPH02*(r_C03_00H+r_C03_03)          | Rickard (2022)                      |
| G46466b | TrGAroC  | $\text{C}_5\text{CO}_2\text{DBCO}_3 + \text{HO}_2 \rightarrow \text{CH}_3\text{C(O)} + \text{HCOCOCHO} + \text{CO}_2 + \text{OH}$               | KAPH02*r_C03_OH                      | Rickard (2022)                      |
| G46467  | TrGAroCN | $\text{C}_5\text{CO}_2\text{DBCO}_3 + \text{NO} \rightarrow \text{CH}_3\text{C(O)} + \text{HCOCOCHO} + \text{CO}_2 + \text{NO}_2$               | KAPN0                                | Rickard (2022)                      |



Table 1: Gas phase reactions (... continued)

| #       | labels   | reaction                                                                                                           | rate coefficient                                                                                     | reference                            |
|---------|----------|--------------------------------------------------------------------------------------------------------------------|------------------------------------------------------------------------------------------------------|--------------------------------------|
| G46468  | TrGAroCN | $\text{C5CO2DBCO3} + \text{NO}_2 \rightarrow \text{C5CO2DBPAN}$                                                    | $k_{\text{CH3CO3\_NO2}}$                                                                             | Rickard (2022)*                      |
| G46469  | TrGAroCN | $\text{C5CO2DBCO3} + \text{NO}_3 \rightarrow \text{CH}_3\text{C(O)} + \text{HCOCOCHO} + \text{CO}_2 + \text{NO}_2$ | $\text{KR02NO3} \times 1.74$                                                                         | Rickard (2022)                       |
| G46470  | TrGAroC  | $\text{C5CO2DBCO3} \rightarrow \text{CH}_3\text{C(O)} + \text{HCOCOCHO} + \text{CO}_2$                             | $k1_{\text{R02RCO3}}$                                                                                | Rickard (2022)                       |
| G46471  | TrGAroCN | $\text{NPHEN1O2} + \text{HO}_2 \rightarrow \text{NPHEN1OOH}$                                                       | $k_{\text{R02\_HO2}}(\text{temp}, 6)$                                                                | Rickard (2022)                       |
| G46472a | TrGAroCN | $\text{NPHEN1O2} + \text{NO} \rightarrow \text{NPHEN1O} + \text{NO}_2$                                             | $\text{KR02NO}$                                                                                      | Rickard (2022)                       |
| G46472b | TrGAroCN | $\text{NPHEN1O2} + \text{NO}_2 \rightarrow \text{NPHEN1O} + \text{NO}_3$                                           | $k_{\text{C6H5O2\_NO2}}$                                                                             | Jagiella and Zabel (2007)*           |
| G46473  | TrGAroCN | $\text{NPHEN1O2} + \text{NO}_3 \rightarrow \text{NPHEN1O} + \text{NO}_2$                                           | $\text{KR02NO3}$                                                                                     | Rickard (2022)                       |
| G46474  | TrGAroCN | $\text{NPHEN1O2} \rightarrow \text{NPHEN1O}$                                                                       | $k1_{\text{R02sRO2}}$                                                                                | Rickard (2022)                       |
| G46475  | TrGAroCN | $\text{NPHENOOH} + \text{OH} \rightarrow \text{NPHENO2}$                                                           | $1.07\text{E}-10$                                                                                    | Rickard (2022)                       |
| G46476  | TrGAroCN | $\text{C6H5O} + \text{NO}_2 \rightarrow \text{HOC6H4NO2}$                                                          | $k_{\text{C6H5O\_NO2}}$                                                                              | Rickard (2022), Platz et al. (1998)* |
| G46477  | TrGAroC  | $\text{C6H5O} + \text{O}_3 \rightarrow \text{C6H5O2}$                                                              | $k_{\text{C6H5O\_O3}}$                                                                               | Rickard (2022), Tao and Li (1999)    |
| G46478  | TrGAroCN | $\text{NCATECOOH} + \text{OH} \rightarrow \text{NCATECO2}$                                                         | $k_{\text{R00HRO}}$                                                                                  | Rickard (2022)                       |
| G46479  | TrGAroC  | $\text{PBZQOOH} + \text{OH} \rightarrow \text{PBZQCO} + \text{OH}$                                                 | $1.23\text{E}-10$                                                                                    | Rickard (2022)                       |
| G46480a | TrGAroC  | $\text{PBZQO2} + \text{HO}_2 \rightarrow \text{PBZQOOH}$                                                           | $k_{\text{R02\_HO2}}(\text{temp}, 6) \times (1 - r_{\text{CHOHCH2O2\_OH}} - r_{\text{COCH2O2\_OH}})$ | Rickard (2022)                       |
| G46480b | TrGAroC  | $\text{PBZQO2} + \text{HO}_2 \rightarrow \text{C5CO2OHCO3} + \text{OH}$                                            | $k_{\text{R02\_HO2}}(\text{temp}, 6) \times (r_{\text{CHOHCH2O2\_OH}} + r_{\text{COCH2O2\_OH}})$     | Rickard (2022)*                      |
| G46481  | TrGAroCN | $\text{PBZQO2} + \text{NO} \rightarrow \text{C5CO2OHCO3} + \text{NO}_2$                                            | $\text{KR02NO}$                                                                                      | Rickard (2022)*                      |
| G46482  | TrGAroCN | $\text{PBZQO2} + \text{NO}_3 \rightarrow \text{C5CO2OHCO3} + \text{NO}_2$                                          | $\text{KR02NO3}$                                                                                     | Rickard (2022)*                      |
| G46483  | TrGAroC  | $\text{PBZQO2} \rightarrow \text{C5CO2OHCO3}$                                                                      | $k1_{\text{R02sOR02}}$                                                                               | Rickard (2022)*                      |
| G46484  | TrGAroC  | $\text{BZOBIPEROH} + \text{OH} \rightarrow \text{MALDIALCO3} + \text{GLYOX}$                                       | $8.16\text{E}-11$                                                                                    | Rickard (2022)                       |
| G46485a | TrGAroCN | $\text{DNPHENO2} + \text{HO}_2 \rightarrow \text{DNPHENOOH}$                                                       | $k_{\text{R02\_HO2}}(\text{temp}, 6) \times (1 - r_{\text{CHOHCH2O2\_OH}})$                          | Rickard (2022)                       |
| G46485b | TrGAroCN | $\text{DNPHENO2} + \text{HO}_2 \rightarrow \text{NC4DCO2H} + \text{HCOCO}_2\text{H} + \text{NO}_2 + \text{OH}$     | $k_{\text{R02\_HO2}}(\text{temp}, 6) \times r_{\text{CHOHCH2O2\_OH}}$                                | Rickard (2022)*                      |
| G46486  | TrGAroCN | $\text{DNPHENO2} + \text{NO} \rightarrow \text{NC4DCO2H} + \text{HCOCO}_2\text{H} + \text{NO}_2 + \text{NO}_2$     | $\text{KR02NO}$                                                                                      | Rickard (2022)*                      |
| G46487  | TrGAroCN | $\text{DNPHENO2} + \text{NO}_3 \rightarrow \text{NC4DCO2H} + \text{HCOCO}_2\text{H} + \text{NO}_2 + \text{NO}_2$   | $\text{KR02NO3}$                                                                                     | Rickard (2022)*                      |
| G46488  | TrGAroCN | $\text{DNPHENO2} \rightarrow \text{NC4DCO2H} + \text{HCOCO}_2\text{H} + \text{NO}_2$                               | $k1_{\text{R02ISOPD02}}$                                                                             | Rickard (2022)*                      |
| G46489  | TrGAroC  | $\text{BZBIPEROOH} + \text{OH} \rightarrow \text{BZOBIPEROH} + \text{OH}$                                          | $9.77\text{E}-11$                                                                                    | Rickard (2022)                       |
| G46490a | TrGAroC  | $\text{BZEMUCO2} + \text{HO}_2 \rightarrow \text{BZEMUCOOH}$                                                       | $k_{\text{R02\_HO2}}(\text{temp}, 6)$                                                                | Rickard (2022)                       |

Table 1: Gas phase reactions (... continued)

| #       | labels   | reaction                                                                                                                                         | rate coefficient                             | reference                  |
|---------|----------|--------------------------------------------------------------------------------------------------------------------------------------------------|----------------------------------------------|----------------------------|
| G46490b | TrGAroC  | BZEMUCO <sub>2</sub> + HO <sub>2</sub> → .5 EPXC4DIAL + .5 GLYOX + .5 HO <sub>2</sub> + .5 C3DIALO <sub>2</sub> + .5 C32OH13CO + OH              | k_R02_H02(temp,6)                            | Rickard (2022)*            |
| G46491a | TrGAroCN | BZEMUCO <sub>2</sub> + NO → BZEMUCNO <sub>3</sub>                                                                                                | KR02N0*alpha_AN(10,2,0,1,0, temp, cair)      | Rickard (2022)             |
| G46491b | TrGAroCN | BZEMUCO <sub>2</sub> + NO → .5 EPXC4DIAL + .5 GLYOX + .5 HO <sub>2</sub> + .5 C3DIALO <sub>2</sub> + .5 C32OH13CO + NO <sub>2</sub>              | KR02N0*(1.-alpha_AN(10,2,0,1,0, temp, cair)) | Rickard (2022)*            |
| G46492  | TrGAroCN | BZEMUCO <sub>2</sub> + NO <sub>3</sub> → .5 EPXC4DIAL + .5 GLYOX + .5 HO <sub>2</sub> + .5 C3DIALO <sub>2</sub> + .5 C32OH13CO + NO <sub>2</sub> | KR02N03                                      | Rickard (2022)*            |
| G46493  | TrGAroC  | BZEMUCO <sub>2</sub> → .5 EPXC4DIAL + .5 GLYOX + .5 HO <sub>2</sub> + .5 C3DIALO <sub>2</sub> + .5 C32OH13CO                                     | k1_R02sOR02                                  | Rickard (2022)*            |
| G46494  | TrGAroCN | C5CO2DBPAN + OH → HCOCOCHO + CH <sub>3</sub> CHO + CO <sub>2</sub> + NO <sub>2</sub>                                                             | 3.28E-11                                     | Rickard (2022)             |
| G46495  | TrGAroCN | C5CO2DBPAN → C5CO2DBCO <sub>3</sub> + NO <sub>2</sub>                                                                                            | k_PAN_M                                      | Rickard (2022)             |
| G46496  | TrGAroCN | NBZQOOH + OH → NBZQO <sub>2</sub>                                                                                                                | 6.68E-11                                     | Rickard (2022)             |
| G46497  | TrGAroC  | CATEC1OOH + OH → CATEC1O <sub>2</sub>                                                                                                            | k_R00HRO                                     | Rickard (2022)             |
| G46498  | TrGAroC  | C6125CO + OH → C5CO14O <sub>2</sub> + CO                                                                                                         | 6.45E-11                                     | Rickard (2022)             |
| G46499a | TrGAroCN | NBZQO <sub>2</sub> + HO <sub>2</sub> → NBZQOOH                                                                                                   | k_R02_H02(temp,6)*(1.-r_COCH2O2_OH)          | Rickard (2022)             |
| G46499b | TrGAroCN | NBZQO <sub>2</sub> + HO <sub>2</sub> → C6CO4DB + NO <sub>2</sub> + OH                                                                            | k_R02_H02(temp,6)*r_COCH2O2_OH               | Rickard (2022)*            |
| G46500  | TrGAroCN | NBZQO <sub>2</sub> + NO → C6CO4DB + NO <sub>2</sub> + NO <sub>2</sub>                                                                            | KR02N0                                       | Rickard (2022)*            |
| G46501  | TrGAroCN | NBZQO <sub>2</sub> + NO <sub>3</sub> → C6CO4DB + NO <sub>2</sub> + NO <sub>2</sub>                                                               | KR02N03                                      | Rickard (2022)*            |
| G46502  | TrGAroCN | NBZQO <sub>2</sub> → C6CO4DB + NO <sub>2</sub>                                                                                                   | k1_R02sOR02                                  | Rickard (2022)*            |
| G46503  | TrGAroCN | DNPHENO <sub>2</sub> + OH → DNPHENO <sub>2</sub>                                                                                                 | k_R00HRO                                     | Rickard (2022)             |
| G46504  | TrGAroC  | CATEC1O <sub>2</sub> + HO <sub>2</sub> → CATEC1OOH                                                                                               | k_R02_H02(temp,6)                            | Rickard (2022)             |
| G46505a | TrGAroCN | CATEC1O <sub>2</sub> + NO → CATEC1O + NO <sub>2</sub>                                                                                            | KR02N0                                       | Rickard (2022)             |
| G46505b | TrGAroCN | CATEC1O <sub>2</sub> + NO <sub>2</sub> → CATEC1O + NO <sub>3</sub>                                                                               | k_C6H5O2_N02                                 | Jagiella and Zabel (2007)* |
| G46506  | TrGAroCN | CATEC1O <sub>2</sub> + NO <sub>3</sub> → CATEC1O + NO <sub>2</sub>                                                                               | KR02N03                                      | Rickard (2022)             |
| G46507  | TrGAroC  | CATEC1O <sub>2</sub> → CATEC1O                                                                                                                   | k1_R02sOR02                                  | Rickard (2022)             |
| G46508  | TrGAroC  | BZEMUCCO <sub>3</sub> H + OH → BZEMUCCO <sub>3</sub>                                                                                             | 4.37E-11                                     | Rickard (2022)             |
| G46509  | TrGAroC  | C6H5OOH + OH → C6H5O <sub>2</sub>                                                                                                                | 3.60E-12                                     | Rickard (2022)             |
| G46510  | TrGAroC  | BZEMUCOOH + OH → BZEMUCCO + OH                                                                                                                   | 1.31E-10                                     | Rickard (2022)             |
| G46511a | TrGAroC  | BZEMUCCO <sub>3</sub> + HO <sub>2</sub> → BZEMUCCO <sub>2</sub> H + O <sub>3</sub>                                                               | KAPH02*r_C03_03                              | Rickard (2022)             |
| G46511b | TrGAroC  | BZEMUCCO <sub>3</sub> + HO <sub>2</sub> → BZEMUCCO <sub>3</sub> H                                                                                | KAPH02*r_C03_00H                             | Rickard (2022)             |
| G46511c | TrGAroC  | BZEMUCCO <sub>3</sub> + HO <sub>2</sub> → C5DIALO <sub>2</sub> + CO <sub>2</sub> + OH                                                            | KAPH02*r_C03_0H                              | Rickard (2022)             |
| G46512  | TrGAroCN | BZEMUCCO <sub>3</sub> + NO → C5DIALO <sub>2</sub> + CO <sub>2</sub> + NO <sub>2</sub>                                                            | KAPNO                                        | Rickard (2022)             |

Table 1: Gas phase reactions (... continued)

| #       | labels   | reaction                                                                                          | rate coefficient                          | reference                               |
|---------|----------|---------------------------------------------------------------------------------------------------|-------------------------------------------|-----------------------------------------|
| G46513  | TrGAroCN | BZEMUCCO3 + NO <sub>2</sub> → BZEMUCPAN                                                           | k_CH3CO3_NO2                              | Rickard (2022)                          |
| G46514  | TrGAroCN | BZEMUCCO3 + NO <sub>3</sub> → C5DIALO2 + CO <sub>2</sub> + NO <sub>2</sub>                        | KR02NO3*1.74                              | Rickard (2022)                          |
| G46515  | TrGAroC  | BZEMUCCO3 → C5DIALO2 + CO <sub>2</sub>                                                            | k1_R02RCO3                                | Rickard (2022)*                         |
| G46516  | TrGAroC  | C6H5O2 + HO <sub>2</sub> → C6H5OOH                                                                | k_R02_H02(temp,6)                         | Rickard (2022)                          |
| G46517  | TrGAroCN | C6H5O2 + NO → C6H5O + NO <sub>2</sub>                                                             | KR02NO                                    | Rickard (2022)                          |
| G46518  | TrGAroCN | C6H5O2 + NO <sub>3</sub> → C6H5O + NO <sub>2</sub>                                                | KR02NO3                                   | Rickard (2022)                          |
| G46519  | TrGAroC  | C6H5O2 → C6H5O                                                                                    | k1_R02sR02                                | Rickard (2022)                          |
| G46520  | TrGAroCN | C6H5O2 + NO <sub>2</sub> → C6H5O + NO <sub>3</sub>                                                | k_C6H5O2_NO2                              | Jagiella and Zabel (2007)               |
| G46521  | TrGAroCN | BZEMUCNO3 + OH → BZEMUCCO + NO <sub>2</sub>                                                       | 4.38E-11                                  | Rickard (2022)                          |
| G46522a | TrGAroC  | BZBIPERO2 + HO <sub>2</sub> → BZBIPEROOH                                                          | k_R02_H02(temp,6)*(1.-r_BIPERO2_OH)       | Rickard (2022)                          |
| G46522b | TrGAroC  | BZBIPERO2 + HO <sub>2</sub> → OH + GLYOX + HO <sub>2</sub> + .5 BZFUONE + .5 BZFUONE              | k_R02_H02(temp,6)*r_BIPERO2_OH            | Rickard (2022), Birdsall et al. (2010)* |
| G46523a | TrGAroCN | BZBIPERO2 + NO → BZBIPERNO3                                                                       | KR02NO*alpha_AN(9,2,0,0,1,temp,cair)      | Rickard (2022)                          |
| G46523b | TrGAroCN | BZBIPERO2 + NO → NO <sub>2</sub> + GLYOX + HO <sub>2</sub> + .5 BZFUONE + .5 BZFUONE              | KR02NO*(1.-alpha_AN(9,2,0,0,1,temp,cair)) | Rickard (2022)*                         |
| G46524  | TrGAroCN | BZBIPERO2 + NO <sub>3</sub> → NO <sub>2</sub> + GLYOX + HO <sub>2</sub> + .5 BZFUONE + .5 BZFUONE | KR02NO3                                   | Rickard (2022)*                         |
| G46525  | TrGAroC  | BZBIPERO2 → GLYOX + HO <sub>2</sub> + BZFUONE                                                     | k1_R02sOR02                               | Rickard (2022)*                         |
| G47200  | TrGTerCN | CO235C6CHO + NO <sub>3</sub> → CO235C6CO3 + HNO <sub>3</sub>                                      | KN03AL*5.5                                | Rickard (2022)                          |
| G47201  | TrGTerC  | CO235C6CHO + OH → CO235C6CO3                                                                      | 6.70E-11                                  | Rickard (2022)                          |
| G47202a | TrGTerC  | CO235C6CO3 + HO <sub>2</sub> → C235C6CO3H                                                         | KAPH02*(r_C03_OOH+r_C03_O3)               | Rickard (2022)                          |
| G47202b | TrGTerC  | CO235C6CO3 + HO <sub>2</sub> → CO235C6O2 + CO <sub>2</sub> + OH                                   | KAPH02*r_C03_OH                           | Rickard (2022)                          |
| G47203  | TrGTerCN | CO235C6CO3 + NO → CO235C6O2 + CO <sub>2</sub> + NO <sub>2</sub>                                   | KAPNO                                     | Rickard (2022)                          |
| G47204  | TrGTerCN | CO235C6CO3 + NO <sub>2</sub> → C7PAN3                                                             | k_CH3CO3_NO2                              | Rickard (2022)                          |
| G47205  | TrGTerC  | CO235C6CO3 → CO235C6O2 + CO <sub>2</sub>                                                          | k1_R02RCO3                                | Rickard (2022)                          |
| G47206  | TrGTerC  | C235C6CO3H + OH → CO235C6CO3                                                                      | 4.75E-12                                  | Rickard (2022)                          |
| G47207  | TrGTerCN | C7PAN3 + OH → CO235C5CHO + CO + NO <sub>2</sub>                                                   | 8.83E-13                                  | Rickard (2022)                          |
| G47208  | TrGTerCN | C7PAN3 → CO235C6CO3 + NO <sub>2</sub>                                                             | k_PAN_M                                   | Rickard (2022)                          |
| G47209a | TrGTerC  | C716O2 + HO <sub>2</sub> → C716OOH                                                                | k_R02_H02(temp,7)*r_COCH202_OOH           | Rickard (2022), Sander et al. (2019)    |
| G47209b | TrGTerC  | C716O2 + HO <sub>2</sub> → CO13C4CHO + CH <sub>3</sub> C(O) + OH                                  | k_R02_H02(temp,7)*r_COCH202_OH            | Rickard (2022), Sander et al. (2019)    |
| G47210  | TrGTerCN | C716O2 + NO → CO13C4CHO + CH <sub>3</sub> C(O) + NO <sub>2</sub>                                  | KR02NO                                    | Rickard (2022)*                         |

Table 1: Gas phase reactions (... continued)

| #       | labels   | reaction                                                                                                                                                    | rate coefficient                                | reference                     |
|---------|----------|-------------------------------------------------------------------------------------------------------------------------------------------------------------|-------------------------------------------------|-------------------------------|
| G47211  | TrGTerC  | $C716O2 \rightarrow CO13C4CHO + CH_3C(O)$                                                                                                                   | k1_R02sOR02                                     | Rickard (2022)                |
| G47212  | TrGTerC  | $C716OOH + OH \rightarrow CO235C6CHO + OH$                                                                                                                  | 1.20E-10                                        | Rickard (2022)                |
| G47213  | TrGTerC  | $C721O2 + HO_2 \rightarrow C721OOH$                                                                                                                         | k_R02_H02(temp, 7)                              | Rickard (2022)                |
| G47214  | TrGTerCN | $C721O2 + NO \rightarrow C722O2 + NO_2$                                                                                                                     | KR02NO                                          | Rickard (2022)*               |
| G47215  | TrGTerC  | $C721O2 \rightarrow C722O2$                                                                                                                                 | k1_R02pR02                                      | Rickard (2022)                |
| G47216  | TrGTerC  | $C721OOH + OH \rightarrow C721O2$                                                                                                                           | 1.27E-11                                        | Rickard (2022)                |
| G47217  | TrGTerC  | $C722O2 + HO_2 \rightarrow C722OOH$                                                                                                                         | k_R02_H02(temp, 7)                              | Rickard (2022)                |
| G47218  | TrGTerCN | $C722O2 + NO \rightarrow CH_3COCH_3 + C44O2 + NO_2$                                                                                                         | KR02NO                                          | Rickard (2022)*               |
| G47219  | TrGTerC  | $C722O2 \rightarrow CH_3COCH_3 + C44O2$                                                                                                                     | k1_R02tR02                                      | Rickard (2022)                |
| G47220  | TrGTerC  | $C722OOH + OH \rightarrow C722O2$                                                                                                                           | 3.31E-11                                        | Rickard (2022)                |
| G47221  | TrGTerC  | $ROO6R3O2 \rightarrow ROO6R5O2$                                                                                                                             | 5.68E10*EXP(-8745./temp)                        | Vereecken and Peeters (2012)  |
| G47222  | TrGTerCN | $ROO6R3O2 + NO \rightarrow ROO6R3O + NO_2$                                                                                                                  | KR02NO                                          | Vereecken and Peeters (2012)* |
| G47223  | TrGTerC  | $ROO6R3O2 + HO_2 \rightarrow 7 \text{ L CARBON}$                                                                                                            | k_R02_H02(temp, 7)                              | Vereecken and Peeters (2012)* |
| G47224  | TrGTerC  | $ROO6R3O2 \rightarrow ROO6R3O$                                                                                                                              | k1_R02sR02                                      | Vereecken and Peeters (2012)  |
| G47225  | TrGTerC  | $ROO6R3O \rightarrow 7 \text{ L CARBON} + HO_2$                                                                                                             | 5.7E10*EXP(-2949./temp)                         | Vereecken and Peeters (2012)* |
| G47226  | TrGTerC  | $ROO6R5O2 \rightarrow 7 \text{ L CARBON} + OH$                                                                                                              | 9.17E10*EXP(-8706./temp)                        | Vereecken and Peeters (2012)* |
| G47400  | TrGAroC  | $TOLUENE + OH \rightarrow .07 \text{ C6H5CH2O2} + .18 \text{ CRESOL} + .18 \text{ HO}_2 + .65 \text{ TLBIPERO2} + .10 \text{ TLEPOXMUC} + .10 \text{ HO}_2$ | 1.8E-12*EXP(340./temp)                          | Rickard (2022)*               |
| G47401  | TrGAroC  | $C6H5CH2O2 + HO_2 \rightarrow C6H5CH2OOH$                                                                                                                   | 1.5E-13*EXP(1310./temp)                         | Rickard (2022)                |
| G47402a | TrGAroCN | $C6H5CH2O2 + NO \rightarrow C6H5CH2NO3$                                                                                                                     | KR02NO*alpha_AN(7,1,0,0,0,temp, cair)           | Rickard (2022)*               |
| G47402b | TrGAroCN | $C6H5CH2O2 + NO \rightarrow BENZAL + HO_2 + NO_2$                                                                                                           | KR02NO*(1.-alpha_AN(7,1,0,0,0,temp, cair))      | Rickard (2022)*               |
| G47403  | TrGAroCN | $C6H5CH2O2 + NO_3 \rightarrow BENZAL + HO_2 + NO_2$                                                                                                         | KR02NO3                                         | Rickard (2022)*               |
| G47404  | TrGAroC  | $C6H5CH2O2 \rightarrow BENZAL + HO_2$                                                                                                                       | 2.*(k_CH3O2*2.4E-14*EXP(1620./temp))**(0.5)*R02 | Rickard (2022)*               |
| G47405  | TrGAroCN | $CRESOL + NO_3 \rightarrow .103 \text{ CRESO2} + .103 \text{ HNO}_3 + .506 \text{ NCRESO2} + .391 \text{ TOL1O} + .391 \text{ HNO}_3$                       | 1.4E-11                                         | Rickard (2022)*               |
| G47406  | TrGAroC  | $CRESOL + OH \rightarrow .2 \text{ CRESO2} + .727 \text{ MCATECHOL} + .727 \text{ HO}_2 + .073 \text{ TOL1O}$                                               | 4.65E-11                                        | Rickard (2022)*               |
| G47407a | TrGAroC  | $TLBIPERO2 + HO_2 \rightarrow TLBIPEROOH$                                                                                                                   | k_R02_H02(temp, 7)*(1.-r_BIPERO2_OH)            | Rickard (2022)                |

Table 1: Gas phase reactions (... continued)

| #       | labels   | reaction                                                                                                                                                                                                                                                      | rate coefficient                             | reference                               |
|---------|----------|---------------------------------------------------------------------------------------------------------------------------------------------------------------------------------------------------------------------------------------------------------------|----------------------------------------------|-----------------------------------------|
| G47407b | TrGAroC  | TLBIPERO2 + HO <sub>2</sub> → OH + .6 GLYOX + .4 MGLYOX + HO <sub>2</sub> + .2 C4MDIAL + .2 C5DICARB + .2 TLFUONE + .2 BZFUONE + .2 MALDIAL                                                                                                                   | k_R02_H02(temp,7)*r_BIPERO2_OH               | Rickard (2022), Birdsall et al. (2010)* |
| G47408a | TrGAroCN | TLBIPERO2 + NO → NO <sub>2</sub> + .6 GLYOX + .4 MGLYOX + HO <sub>2</sub> + .2 C4MDIAL + .2 C5DICARB + .2 TLFUONE + .2 BZFUONE + .2 MALDIAL                                                                                                                   | KR02N0*(1.-alpha_AN(11,2,0,0,1, temp, cair)) | Rickard (2022)*                         |
| G47408b | TrGAroCN | TLBIPERO2 + NO → TLBIPERNO3                                                                                                                                                                                                                                   | KR02N0*alpha_AN(11,2,0,0,1, temp, cair)      | Rickard (2022)*                         |
| G47409  | TrGAroCN | TLBIPERO2 + NO <sub>3</sub> → NO <sub>2</sub> + .6 GLYOX + .4 MGLYOX + HO <sub>2</sub> + .2 C4MDIAL + .2 C5DICARB + .2 TLFUONE + .2 BZFUONE + .2 MALDIAL                                                                                                      | KR02N03                                      | Rickard (2022)*                         |
| G47410  | TrGAroC  | TLBIPERO2 → .6 GLYOX + .4 MGLYOX + HO <sub>2</sub> + .2 C4MDIAL + .2 C5DICARB + .2 TLFUONE + .2 BZFUONE + .2 MALDIAL                                                                                                                                          | k1_R02sOR02                                  | Rickard (2022)*                         |
| G47411  | TrGAroCN | TLEPOXMUC + NO <sub>3</sub> → TLEMUCCO3 + HNO <sub>3</sub>                                                                                                                                                                                                    | KN03AL*2.75                                  | Rickard (2022)                          |
| G47412  | TrGAroC  | TLEPOXMUC + O <sub>3</sub> → EPXC4DIAL + .125 CH <sub>3</sub> CHO + .695 CH <sub>3</sub> C(O) + .57 CO + .57 OH + .125 HO <sub>2</sub> + .1125 CH <sub>3</sub> COCO <sub>2</sub> H + .0675 MGLYOX + .0675 H <sub>2</sub> O <sub>2</sub> + .25 CO <sub>2</sub> | 5.00E-18                                     | Rickard (2022)*                         |
| G47413  | TrGAroC  | TLEPOXMUC + OH → .31 TLEMUCCO3 + .69 TLEMUCO2                                                                                                                                                                                                                 | 7.99E-11                                     | Rickard (2022)*                         |
| G47414  | TrGAroC  | C6H5CH2OOH + OH → BENZAL + OH                                                                                                                                                                                                                                 | 2.05E-11                                     | Rickard (2022)                          |
| G47415  | TrGAroCN | C6H5CH2NO3 + OH → BENZAL + NO <sub>2</sub>                                                                                                                                                                                                                    | 6.03E-12                                     | Rickard (2022)                          |
| G47416  | TrGAroCN | BENZAL + NO <sub>3</sub> → C6H5CO3 + HNO <sub>3</sub>                                                                                                                                                                                                         | 2.40E-15                                     | Rickard (2022)                          |
| G47417  | TrGAroC  | BENZAL + OH → C6H5CO3                                                                                                                                                                                                                                         | 5.9E-12*EXP(225./temp)                       | Rickard (2022)                          |
| G47418a | TrGAroC  | CRESO2 + HO <sub>2</sub> → CRESOOH                                                                                                                                                                                                                            | k_R02_H02(temp,7)*(1.-r_CHOCH202_OH)         | Rickard (2022)                          |
| G47418b | TrGAroC  | CRESO2 + HO <sub>2</sub> → .68 C5CO14OH + .68 GLYOX + HO <sub>2</sub> + .32 PTLQONE + OH                                                                                                                                                                      | k_R02_H02(temp,7)*r_CHOCH202_OH              | Rickard (2022)*                         |
| G47419  | TrGAroCN | CRESO2 + NO → .68 C5CO14OH + .68 GLYOX + HO <sub>2</sub> + .32 PTLQONE + NO <sub>2</sub>                                                                                                                                                                      | KR02N0                                       | Rickard (2022)*                         |
| G47420  | TrGAroCN | CRESO2 + NO <sub>3</sub> → .68 C5CO14OH + .68 GLYOX + HO <sub>2</sub> + .32 PTLQONE + NO <sub>2</sub>                                                                                                                                                         | KR02N03                                      | Rickard (2022)*                         |
| G47421  | TrGAroC  | CRESO2 → .68 C5CO14OH + .68 GLYOX + HO <sub>2</sub> + .32 PTLQONE                                                                                                                                                                                             | k1_R02ISOPD02                                | Rickard (2022)*                         |

Table 1: Gas phase reactions (... continued)

| #       | labels   | reaction                                                                                                    | rate coefficient                                       | reference                            |
|---------|----------|-------------------------------------------------------------------------------------------------------------|--------------------------------------------------------|--------------------------------------|
| G47422a | TrGAroCN | NCRESO2 + HO <sub>2</sub> → NCRESOOH                                                                        | k_R02_H02(temp,7)*(1.-r_<br>CHOHCH202_OH)              | Rickard (2022)                       |
| G47422b | TrGAroCN | NCRESO2 + HO <sub>2</sub> → C5CO14OH + GLYOX + NO <sub>2</sub> + OH                                         | k_R02_H02(temp,7)*r_CHOHCH202_OH                       | Rickard (2022)*                      |
| G47423  | TrGAroCN | NCRESO2 + NO → C5CO14OH + GLYOX + NO <sub>2</sub> + NO <sub>2</sub>                                         | KR02N0                                                 | Rickard (2022)*                      |
| G47424  | TrGAroCN | NCRESO2 + NO <sub>3</sub> → C5CO14OH + GLYOX + NO <sub>2</sub> + NO <sub>2</sub>                            | KR02N03                                                | Rickard (2022)*                      |
| G47425  | TrGAroCN | NCRESO2 → C5CO14OH + GLYOX + NO <sub>2</sub>                                                                | k1_R02IS0PD02                                          | Rickard (2022)*                      |
| G47426  | TrGAroCN | TOL1O + NO <sub>2</sub> → TOL1OHNO2                                                                         | k_C6H50_N02                                            | Rickard (2022), Platz et al. (1998)* |
| G47427  | TrGAroC  | TOL1O + O <sub>3</sub> → OXYL1O2                                                                            | k_C6H50_03                                             | Rickard (2022), Tao and Li (1999)    |
| G47428  | TrGAroCN | MCATECHOL + NO <sub>3</sub> → MCATEC1O + HNO <sub>3</sub>                                                   | 1.7E-10*1.0                                            | Rickard (2022)                       |
| G47429  | TrGAroC  | MCATECHOL + O <sub>3</sub> → MC3ODBCO2H + HCOCO <sub>2</sub> H + HO <sub>2</sub> + OH                       | 2.8E-17                                                | Rickard (2022)*                      |
| G47430  | TrGAroC  | MCATECHOL + OH → MCATEC1O                                                                                   | 2.0E-10*1.0                                            | Rickard (2022)                       |
| G47431  | TrGAroC  | TLBIPEROOH + OH → TLOBIPEROH + OH                                                                           | 9.64E-11                                               | Rickard (2022)                       |
| G47432  | TrGAroCN | TLBIPERNO3 + OH → TLOBIPEROH + NO <sub>2</sub>                                                              | 7.16E-11                                               | Rickard (2022)                       |
| G47433  | TrGAroC  | TLOBIPEROH + OH → C5CO14O2 + GLYOX                                                                          | 7.99E-11                                               | Rickard (2022)                       |
| G47434a | TrGAroC  | TLEMUCCO3 + HO <sub>2</sub> → C615CO2O2 + CO <sub>2</sub> + OH                                              | KAPH02*r_C03_OH                                        | Rickard (2022)                       |
| G47434b | TrGAroC  | TLEMUCCO3 + HO <sub>2</sub> → TLEMUCCO2H + O <sub>3</sub>                                                   | KAPH02*r_C03_03                                        | Rickard (2022)                       |
| G47434c | TrGAroC  | TLEMUCCO3 + HO <sub>2</sub> → TLEMUCCO3H                                                                    | KAPH02*r_C03_00H                                       | Rickard (2022)                       |
| G47435  | TrGAroCN | TLEMUCCO3 + NO → C615CO2O2 + CO <sub>2</sub> + NO <sub>2</sub>                                              | KAPN0                                                  | Rickard (2022)                       |
| G47436  | TrGAroCN | TLEMUCCO3 + NO <sub>2</sub> → TLEMUCPAN                                                                     | k_CH3C03_N02                                           | Rickard (2022)*                      |
| G47437  | TrGAroCN | TLEMUCCO3 + NO <sub>3</sub> → C615CO2O2 + CO <sub>2</sub> + NO <sub>2</sub>                                 | KR02N03*1.74                                           | Rickard (2022)                       |
| G47438  | TrGAroC  | TLEMUCCO3 → C615CO2O2 + CO <sub>2</sub>                                                                     | k1_R02RC03                                             | Rickard (2022)*                      |
| G47439a | TrGAroC  | TLEMUCO2 + HO <sub>2</sub> → TLEMUCOOH                                                                      | k_R02_H02(temp,7)*(1.-r_<br>CHOHCH202_OH-r_COCH202_OH) | Rickard (2022)                       |
| G47439b | TrGAroC  | TLEMUCO2 + HO <sub>2</sub> → .5 C3DIALO2 + .5 CO2H3CHO + .5 EPXC4DIAL + .5 MGLYOX + .5 HO <sub>2</sub> + OH | k_R02_H02(temp,7)*(r_CHOHCH202_OH+r_COCH202_OH)        | Rickard (2022)*                      |
| G47440a | TrGAroCN | TLEMUCO2 + NO → TLEMUCNO3                                                                                   | KR02N0*alpha_AN(11,2,1,0,0,<br>temp, cair)             | Rickard (2022)                       |
| G47440b | TrGAroCN | TLEMUCO2 + NO → .5 C3DIALO2 + .5 CO2H3CHO + .5 EPXC4DIAL + .5 MGLYOX + .5 HO <sub>2</sub> + NO <sub>2</sub> | KR02N0*(1.-alpha_AN(11,2,1,0,0,<br>temp, cair))        | Rickard (2022)*                      |

Table 1: Gas phase reactions (... continued)

| #       | labels   | reaction                                                                                                                    | rate coefficient            | reference                              |
|---------|----------|-----------------------------------------------------------------------------------------------------------------------------|-----------------------------|----------------------------------------|
| G47441  | TrGAroCN | TLEMUCO2 + NO <sub>3</sub> → .5 C3DIALO2 + .5 CO2H3CHO +<br>.5 EPXC4DIAL + .5 MGLYOX + .5 HO <sub>2</sub> + NO <sub>2</sub> | KR02N03                     | Rickard (2022)*                        |
| G47442  | TrGAroC  | TLEMUCO2 → .5 C3DIALO2 + .5 CO2H3CHO + .5<br>EPXC4DIAL + .5 MGLYOX + .5 HO <sub>2</sub>                                     | k1_R02s0R02                 | Rickard (2022)*                        |
| G47443a | TrGAroC  | C6H5CO3 + HO <sub>2</sub> → C6H5CO3H                                                                                        | 1.1E-11*EXP(364./temp)*0.65 | Roth et al. (2010)                     |
| G47443b | TrGAroC  | C6H5CO3 + HO <sub>2</sub> → C6H5O2 + CO <sub>2</sub> + OH                                                                   | 1.1E-11*EXP(364./temp)*0.20 | Roth et al. (2010)                     |
| G47443c | TrGAroC  | C6H5CO3 + HO <sub>2</sub> → PHCOOH + O <sub>3</sub>                                                                         | 1.1E-11*EXP(364./temp)*0.15 | Roth et al. (2010)                     |
| G47444  | TrGAroCN | C6H5CO3 + NO → C6H5O2 + CO <sub>2</sub> + NO <sub>2</sub>                                                                   | KAPN0                       | Rickard (2022)                         |
| G47445  | TrGAroCN | C6H5CO3 + NO <sub>2</sub> → PBZN                                                                                            | k_CH3CO3_N02                | Rickard (2022)*                        |
| G47446  | TrGAroCN | C6H5CO3 + NO <sub>3</sub> → C6H5O2 + CO <sub>2</sub> + NO <sub>2</sub>                                                      | KR02N03*1.74                | Rickard (2022)                         |
| G47447  | TrGAroC  | C6H5CO3 → C6H5O2 + CO <sub>2</sub>                                                                                          | k1_R02RC03                  | Rickard (2022)*                        |
| G47448  | TrGAroC  | CRESOOH + OH → CRESO2                                                                                                       | 1.15E-10                    | Rickard (2022)                         |
| G47449  | TrGAroCN | NCRESOOH + OH → NCRESO2                                                                                                     | 1.07E-10                    | Rickard (2022)                         |
| G47450  | TrGAroCN | TOL1OHNO2 + NO <sub>3</sub> → NCRES1O + HNO <sub>3</sub>                                                                    | 3.13E-13*1.0                | Rickard (2022)                         |
| G47451  | TrGAroCN | TOL1OHNO2 + OH → NCRES1O                                                                                                    | 2.8E-12                     | Rickard (2022)                         |
| G47452  | TrGAroC  | OXYL1O2 + HO <sub>2</sub> → OXYL1OOH                                                                                        | k_R02_H02(temp, 7)          | Rickard (2022)                         |
| G47453  | TrGAroCN | OXYL1O2 + NO → TOL1O + NO <sub>2</sub>                                                                                      | KR02N0                      | Rickard (2022)                         |
| G47454  | TrGAroCN | OXYL1O2 + NO <sub>2</sub> → TOL1O + NO <sub>3</sub>                                                                         | k_C6H502_N02                | Jagiella and Zabel (2007)*             |
| G47455  | TrGAroCN | OXYL1O2 + NO <sub>3</sub> → TOL1O + NO <sub>2</sub>                                                                         | KR02N03                     | Rickard (2022)                         |
| G47456  | TrGAroC  | OXYL1O2 → TOL1O                                                                                                             | k1_R02sR02                  | Rickard (2022)                         |
| G47457  | TrGAroCN | MCATEC1O + NO <sub>2</sub> → MNCATECH                                                                                       | k_C6H50_N02                 | Rickard (2022), Platz et al.<br>(1998) |
| G47458  | TrGAroC  | MCATEC1O + O <sub>3</sub> → MCATEC1O2                                                                                       | k_C6H50_03                  | Rickard (2022), Tao and Li<br>(1999)   |
| G47459  | TrGAroC  | TLEMUCCO2H + OH → C615CO2O2 + CO <sub>2</sub>                                                                               | 5.98E-11                    | Rickard (2022)                         |
| G47460  | TrGAroC  | TLEMUCCO3H + OH → TLEMUCCO3                                                                                                 | 6.29E-11                    | Rickard (2022)                         |
| G47461  | TrGAroCN | TLEMUCPAN + OH → C5DICARB + CO + CO <sub>2</sub> + NO <sub>2</sub>                                                          | 5.96E-11                    | Rickard (2022)                         |
| G47462  | TrGAroCN | TLEMUCPAN → TLEMUCCO3 + NO <sub>2</sub>                                                                                     | k_PAN_M                     | Rickard (2022)                         |
| G47463  | TrGAroC  | TLEMUCOOH + OH → TLEMUCCO + OH                                                                                              | 7.04E-11                    | Rickard (2022)                         |
| G47464  | TrGAroCN | TLEMUCNO3 + OH → TLEMUCCO + NO <sub>2</sub>                                                                                 | 3.06E-11                    | Rickard (2022)                         |
| G47465  | TrGAroC  | TLEMUCCO + OH → CH <sub>3</sub> C(O) + EPXC4DIAL + CO                                                                       | 4.06E-11                    | Rickard (2022)                         |
| G47466  | TrGAroC  | C6H5CO3H + OH → C6H5CO3                                                                                                     | 4.66E-12                    | Rickard (2022)                         |
| G47467  | TrGAroC  | PHCOOH + OH → C6H5O2 + CO <sub>2</sub>                                                                                      | 1.10E-12                    | Rickard (2022)                         |
| G47468  | TrGAroCN | PBZN + OH → C6H5OOH + CO + NO <sub>2</sub>                                                                                  | 1.06E-12                    | Rickard (2022)                         |
| G47469  | TrGAroCN | PBZN → C6H5CO3 + NO <sub>2</sub>                                                                                            | k_PAN_M*0.67                | Rickard (2022)                         |

Table 1: Gas phase reactions (... continued)

| #       | labels   | reaction                                                                | rate coefficient                                        | reference                           |
|---------|----------|-------------------------------------------------------------------------|---------------------------------------------------------|-------------------------------------|
| G47470  | TrGAroCN | PTLQONE + NO <sub>3</sub> → NPTLQO2                                     | 1.00E-12                                                | Rickard (2022)                      |
| G47471  | TrGAroC  | PTLQONE + OH → PTLQO2                                                   | 2.3E-11                                                 | Rickard (2022)                      |
| G47472  | TrGAroCN | NCRES1O + NO <sub>2</sub> → DNCRES                                      | k_C6H50_N02                                             | Rickard (2022), Platz et al. (1998) |
| G47473  | TrGAroCN | NCRES1O + O <sub>3</sub> → NCRES1O2                                     | k_C6H50_O3                                              | Rickard (2022), Tao and Li (1999)   |
| G47474  | TrGAroC  | OXYL1OOH + OH → OXYL1O2                                                 | 4.65E-11                                                | Rickard (2022)                      |
| G47475  | TrGAroCN | MNCATECH + NO <sub>3</sub> → MNNCATECO2                                 | 5.03E-12                                                | Rickard (2022)                      |
| G47476  | TrGAroCN | MNCATECH + OH → MNCATECO2                                               | 6.83E-12                                                | Rickard (2022)                      |
| G47477  | TrGAroC  | MCATEC1O2 + HO <sub>2</sub> → MCATEC1OOH                                | k_R02_H02(temp, 7)                                      | Rickard (2022)                      |
| G47478  | TrGAroCN | MCATEC1O2 + NO → MCATEC1O + NO <sub>2</sub>                             | KR02N0                                                  | Rickard (2022)                      |
| G47479  | TrGAroCN | MCATEC1O2 + NO <sub>2</sub> → MCATEC1O + NO <sub>3</sub>                | k_C6H502_N02                                            | Jagiella and Zabel (2007)*          |
| G47480  | TrGAroCN | MCATEC1O2 + NO <sub>3</sub> → MCATEC1O + NO <sub>2</sub>                | KR02N03                                                 | Rickard (2022)                      |
| G47481  | TrGAroC  | MCATEC1O2 → MCATEC1O                                                    | k1_R02sOR02                                             | Rickard (2022)                      |
| G47482a | TrGAroCN | NPTLQO2 + HO <sub>2</sub> → NPTLQOOH                                    | k_R02_H02(temp, 7) * (1 - r_COCH202_OH)                 | Rickard (2022)                      |
| G47482b | TrGAroCN | NPTLQO2 + HO <sub>2</sub> → C7CO4DB + NO <sub>2</sub> + OH              | k_R02_H02(temp, 7) * r_COCH202_OH                       | Rickard (2022)*                     |
| G47483  | TrGAroCN | NPTLQO2 + NO → C7CO4DB + NO <sub>2</sub> + NO <sub>2</sub>              | KR02N0                                                  | Rickard (2022)*                     |
| G47484  | TrGAroCN | NPTLQO2 + NO <sub>3</sub> → C7CO4DB + NO <sub>2</sub> + NO <sub>2</sub> | KR02N03                                                 | Rickard (2022)*                     |
| G47485  | TrGAroCN | NPTLQO2 → C7CO4DB + NO <sub>2</sub>                                     | k1_R02sOR02                                             | Rickard (2022)*                     |
| G47486a | TrGAroC  | PTLQO2 + HO <sub>2</sub> → PTLQOOH                                      | k_R02_H02(temp, 7) * (1 - r_CHOCH202_OH - r_COCH202_OH) | Rickard (2022)                      |
| G47486b | TrGAroC  | PTLQO2 + HO <sub>2</sub> → C6CO2OHCO3 + OH                              | k_R02_H02(temp, 7) * (r_CHOCH202_OH + r_COCH202_OH)     | Rickard (2022)*                     |
| G47487  | TrGAroCN | PTLQO2 + NO → C6CO2OHCO3 + NO <sub>2</sub>                              | KR02N0                                                  | Rickard (2022)*                     |
| G47488  | TrGAroCN | PTLQO2 + NO <sub>3</sub> → C6CO2OHCO3 + NO <sub>2</sub>                 | KR02N03                                                 | Rickard (2022)*                     |
| G47489  | TrGAroC  | PTLQO2 → C6CO2OHCO3                                                     | k1_R02sOR02                                             | Rickard (2022)*                     |
| G47490  | TrGAroCN | DNCRES + NO <sub>3</sub> → NDNCRESO2                                    | 7.83E-15                                                | Rickard (2022)                      |
| G47491  | TrGAroCN | DNCRES + OH → DNCRESO2                                                  | 5.10E-14                                                | Rickard (2022)                      |
| G47492  | TrGAroCN | NCRES1O2 + HO <sub>2</sub> → NCRES1OOH                                  | k_R02_H02(temp, 7)                                      | Rickard (2022)                      |
| G47493  | TrGAroCN | NCRES1O2 + NO → NCRES1O + NO <sub>2</sub>                               | KR02N0                                                  | Rickard (2022)                      |
| G47494  | TrGAroCN | NCRES1O2 + NO <sub>2</sub> → NCRES1O + NO <sub>3</sub>                  | k_C6H502_N02                                            | Jagiella and Zabel (2007)*          |
| G47495  | TrGAroCN | NCRES1O2 + NO <sub>3</sub> → NCRES1O + NO <sub>2</sub>                  | KR02N03                                                 | Rickard (2022)                      |
| G47496  | TrGAroCN | NCRES1O2 → NCRES1O                                                      | k1_R02sR02                                              | Rickard (2022)                      |



Table 1: Gas phase reactions (... continued)

| #       | labels   | reaction                                                                                                                           | rate coefficient                          | reference       |
|---------|----------|------------------------------------------------------------------------------------------------------------------------------------|-------------------------------------------|-----------------|
| G47497a | TrGAroCN | MNNCATECO <sub>2</sub> + HO <sub>2</sub> → MNNCATCOOH                                                                              | k_R02_H02(temp,7)*(1.-r_<br>CHOHCH202_OH) | Rickard (2022)  |
| G47497b | TrGAroCN | MNNCATECO <sub>2</sub> + HO <sub>2</sub> → NC4MDCO <sub>2</sub> HN + HCOCO <sub>2</sub> H<br>+ NO <sub>2</sub> + OH                | k_R02_H02(temp,7)*r_CHOHCH202_OH          | Rickard (2022)* |
| G47498  | TrGAroCN | MNNCATECO <sub>2</sub> + NO → NC4MDCO <sub>2</sub> HN + HCOCO <sub>2</sub> H<br>+ NO <sub>2</sub> + NO <sub>2</sub>                | KR02N0                                    | Rickard (2022)* |
| G47499  | TrGAroCN | MNNCATECO <sub>2</sub> + NO <sub>3</sub> → NC4MDCO <sub>2</sub> HN + HCOCO <sub>2</sub> H<br>+ NO <sub>2</sub> + NO <sub>2</sub>   | KR02N03                                   | Rickard (2022)* |
| G47500  | TrGAroCN | MNNCATECO <sub>2</sub> → NC4MDCO <sub>2</sub> HN + HCOCO <sub>2</sub> H + NO <sub>2</sub>                                          | k1_R02IS0PD02                             | Rickard (2022)  |
| G47501a | TrGAroCN | MNCATECO <sub>2</sub> + HO <sub>2</sub> → MNCATECOOH                                                                               | k_R02_H02(temp,7)*(1.-r_<br>CHOHCH202_OH) | Rickard (2022)  |
| G47501b | TrGAroCN | MNCATECO <sub>2</sub> + HO <sub>2</sub> → NC4MDCO <sub>2</sub> HN + HCOCO <sub>2</sub> H<br>+ HO <sub>2</sub> + OH                 | k_R02_H02(temp,7)*r_CHOHCH202_OH          | Rickard (2022)* |
| G47502  | TrGAroCN | MNCATECO <sub>2</sub> + NO → NC4MDCO <sub>2</sub> HN + HCOCO <sub>2</sub> H +<br>HO <sub>2</sub> + NO <sub>2</sub>                 | KR02N0                                    | Rickard (2022)* |
| G47503  | TrGAroCN | MNCATECO <sub>2</sub> + NO <sub>3</sub> → NC4MDCO <sub>2</sub> HN + HCOCO <sub>2</sub> H<br>+ HO <sub>2</sub> + NO <sub>2</sub>    | KR02N03                                   | Rickard (2022)* |
| G47504  | TrGAroCN | MNCATECO <sub>2</sub> → NC4MDCO <sub>2</sub> HN + HCOCO <sub>2</sub> H + HO <sub>2</sub>                                           | k1_R02IS0PD02                             | Rickard (2022)* |
| G47505  | TrGAroC  | MCATEC1OOH + OH → MCATEC1O2                                                                                                        | 2.05E-10                                  | Rickard (2022)  |
| G47506  | TrGAroCN | NPTLQOOH + OH → NPTLQO2                                                                                                            | 8.56E-11                                  | Rickard (2022)  |
| G47507  | TrGAroC  | PTLQOOH + OH → PTLQCO + OH                                                                                                         | 1.42E-10                                  | Rickard (2022)  |
| G47508  | TrGAroC  | PTLQCO + OH → C6CO2OHCO3                                                                                                           | 7.95E-11                                  | Rickard (2022)  |
| G47509a | TrGAroCN | NDNCRESO <sub>2</sub> + HO <sub>2</sub> → NDNCRESOOH                                                                               | k_R02_H02(temp,7)*(1.-r_<br>CHOHCH202_OH) | Rickard (2022)  |
| G47509b | TrGAroCN | NDNCRESO <sub>2</sub> + HO <sub>2</sub> → NC4MDCO <sub>2</sub> HN + HNO <sub>3</sub> + 2<br>CO + NO <sub>2</sub> + OH              | k_R02_H02(temp,7)*r_CHOHCH202_OH          | Rickard (2022)* |
| G47510  | TrGAroCN | NDNCRESO <sub>2</sub> + NO → NC4MDCO <sub>2</sub> HN + HNO <sub>3</sub> + 2 CO<br>+ NO <sub>2</sub> + NO <sub>2</sub>              | KR02N0                                    | Rickard (2022)* |
| G47511  | TrGAroCN | NDNCRESO <sub>2</sub> + NO <sub>3</sub> → NC4MDCO <sub>2</sub> HN + HNO <sub>3</sub> + 2<br>CO + NO <sub>2</sub> + NO <sub>2</sub> | KR02N03                                   | Rickard (2022)* |
| G47512  | TrGAroCN | NDNCRESO <sub>2</sub> → NC4MDCO <sub>2</sub> HN + HNO <sub>3</sub> + 2 CO + NO <sub>2</sub>                                        | k1_R02IS0PD02                             | Rickard (2022)* |
| G47513a | TrGAroCN | DNCRESO <sub>2</sub> + HO <sub>2</sub> → DNCRESOOH                                                                                 | k_R02_H02(temp,7)*(1.-r_<br>CHOHCH202_OH) | Rickard (2022)  |
| G47513b | TrGAroCN | DNCRESO <sub>2</sub> + HO <sub>2</sub> → NC4MDCO <sub>2</sub> HN + HCOCO <sub>2</sub> H +<br>NO <sub>2</sub> + OH                  | k_R02_H02(temp,7)*r_CHOHCH202_OH          | Rickard (2022)* |

Table 1: Gas phase reactions (... continued)

| #       | labels   | reaction                                                                                                                       | rate coefficient            | reference       |
|---------|----------|--------------------------------------------------------------------------------------------------------------------------------|-----------------------------|-----------------|
| G47514  | TrGAroCN | $\text{DNCRESO}_2 + \text{NO} \rightarrow \text{NC4MDCO}_2\text{HN} + \text{HCOCO}_2\text{H} + \text{NO}_2 + \text{NO}_2$      | KR02N0                      | Rickard (2022)* |
| G47515  | TrGAroCN | $\text{DNCRESO}_2 + \text{NO}_3 \rightarrow \text{NC4MDCO}_2\text{HN} + \text{HCOCO}_2\text{H} + \text{NO}_2 + \text{NO}_2$    | KR02N03                     | Rickard (2022)* |
| G47516  | TrGAroCN | $\text{DNCRESO}_2 \rightarrow \text{NC4MDCO}_2\text{HN} + \text{HCOCO}_2\text{H} + \text{NO}_2$                                | k1_R02IS0PD02               | Rickard (2022)* |
| G47517  | TrGAroCN | $\text{NCRES1OOH} + \text{OH} \rightarrow \text{NCRES1O}_2$                                                                    | 1.53E-12                    | Rickard (2022)  |
| G47518  | TrGAroCN | $\text{MNNCATCOOH} + \text{OH} \rightarrow \text{MNNCATECO}_2$                                                                 | k_R00HRO                    | Rickard (2022)  |
| G47519  | TrGAroCN | $\text{MNCATECOOH} + \text{OH} \rightarrow \text{MNCATECO}_2$                                                                  | k_R00HRO                    | Rickard (2022)  |
| G47520  | TrGAroC  | $\text{C7CO4DB} + \text{OH} \rightarrow \text{CO} + \text{CO} + \text{CH}_3\text{C(O)} + \text{HCOCOCHO}$                      | 9.58E-11                    | Rickard (2022)  |
| G47521a | TrGAroC  | $\text{C6CO2OHCO}_3 + \text{HO}_2 \rightarrow \text{C5134CO}_2\text{OH} + \text{HO}_2 + \text{CO} + \text{CO}_2 + \text{OH}$   | KAPH02*r_C03_OH             | Rickard (2022)  |
| G47521b | TrGAroC  | $\text{C6CO2OHCO}_3 + \text{HO}_2 \rightarrow \text{C6COOHCO}_3\text{H}$                                                       | KAPH02*(r_C03_00H+r_C03_03) | Rickard (2022)  |
| G47522  | TrGAroCN | $\text{C6CO2OHCO}_3 + \text{NO} \rightarrow \text{C5134CO}_2\text{OH} + \text{HO}_2 + \text{CO} + \text{CO}_2 + \text{NO}_2$   | KAPN0                       | Rickard (2022)  |
| G47523  | TrGAroCN | $\text{C6CO2OHCO}_3 + \text{NO}_2 \rightarrow \text{C6CO}_2\text{OHPAN}$                                                       | k_CH3C03_N02                | Rickard (2022)  |
| G47524  | TrGAroCN | $\text{C6CO2OHCO}_3 + \text{NO}_3 \rightarrow \text{C5134CO}_2\text{OH} + \text{HO}_2 + \text{CO} + \text{CO}_2 + \text{NO}_2$ | KR02N03*1.74                | Rickard (2022)  |
| G47525  | TrGAroC  | $\text{C6CO2OHCO}_3 \rightarrow \text{C5134CO}_2\text{OH} + \text{HO}_2 + \text{CO} + \text{CO}_2$                             | k1_R02RC03                  | Rickard (2022)  |
| G47526  | TrGAroCN | $\text{NDNCRESOOH} + \text{OH} \rightarrow \text{NDNCRESO}_2$                                                                  | k_R00HRO                    | Rickard (2022)  |
| G47527  | TrGAroCN | $\text{DNCRESOOH} + \text{OH} \rightarrow \text{DNCRESO}_2$                                                                    | k_R00HRO                    | Rickard (2022)  |
| G47528  | TrGAroC  | $\text{C6COOHCO}_3\text{H} + \text{OH} \rightarrow \text{C6CO}_2\text{OHCO}_3$                                                 | 9.29E-11                    | Rickard (2022)  |
| G47529  | TrGAroCN | $\text{C6CO}_2\text{OHPAN} + \text{OH} \rightarrow \text{C5134CO}_2\text{OH} + \text{CO} + \text{CO} + \text{NO}_2$            | 8.96E-11                    | Rickard (2022)  |
| G47530  | TrGAroCN | $\text{C6CO}_2\text{OHPAN} \rightarrow \text{C6CO}_2\text{OHCO}_3 + \text{NO}_2$                                               | k_PAN_M                     | Rickard (2022)  |
| G48200  | TrGTerC  | $\text{C85O}_2 \rightarrow \text{C86O}_2$                                                                                      | k1_R02tR02                  | Rickard (2022)  |
| G48201  | TrGTerC  | $\text{C85O}_2 + \text{HO}_2 \rightarrow \text{C85OOH}$                                                                        | k_R02_H02(temp,8)           | Rickard (2022)  |
| G48202  | TrGTerCN | $\text{C85O}_2 + \text{NO} \rightarrow \text{C86O}_2 + \text{NO}_2$                                                            | KR02N0                      | Rickard (2022)* |
| G48203  | TrGTerC  | $\text{C85OOH} + \text{OH} \rightarrow \text{C85O}_2$                                                                          | 1.29E-11                    | Rickard (2022)  |
| G48204  | TrGTerC  | $\text{C86O}_2 \rightarrow \text{C511O}_2 + \text{CH}_3\text{COCH}_3$                                                          | k1_R02tR02                  | Rickard (2022)  |
| G48205  | TrGTerCN | $\text{C86O}_2 + \text{NO} \rightarrow \text{C511O}_2 + \text{CH}_3\text{COCH}_3 + \text{NO}_2$                                | KR02N0                      | Rickard (2022)* |
| G48206  | TrGTerC  | $\text{C86O}_2 + \text{HO}_2 \rightarrow \text{C86OOH}$                                                                        | k_R02_H02(temp,8)           | Rickard (2022)  |
| G48207  | TrGTerC  | $\text{C86OOH} + \text{OH} \rightarrow \text{C86O}_2$                                                                          | 3.45E-11                    | Rickard (2022)  |
| G48208  | TrGTerC  | $\text{C811O}_2 \rightarrow \text{C812O}_2$                                                                                    | k1_R02pR02                  | Rickard (2022)  |
| G48209  | TrGTerC  | $\text{C811O}_2 + \text{HO}_2 \rightarrow 8 \text{ L CARBON}$                                                                  | k_R02_H02(temp,8)           | Rickard (2022)  |

Table 1: Gas phase reactions (... continued)

| #       | labels   | reaction                                                                                       | rate coefficient                            | reference            |
|---------|----------|------------------------------------------------------------------------------------------------|---------------------------------------------|----------------------|
| G48210  | TrGTerCN | $\text{C811O2} + \text{NO} \rightarrow \text{C812O2} + \text{NO}_2$                            | KR02NO                                      | Rickard (2022)*      |
| G48211  | TrGTerC  | $\text{C812O2} \rightarrow \text{C813O2}$                                                      | k1_R02t0R02                                 | Rickard (2022)       |
| G48212  | TrGTerCN | $\text{C812O2} + \text{NO} \rightarrow \text{C813O2} + \text{NO}_2$                            | KR02NO                                      | Rickard (2022)*      |
| G48213  | TrGTerC  | $\text{C812O2} + \text{HO}_2 \rightarrow \text{C812OOH}$                                       | k_R02_H02(temp,8)                           | Rickard (2022)       |
| G48214  | TrGTerC  | $\text{C812OOH} + \text{OH} \rightarrow \text{C812O2}$                                         | 1.09E-11                                    | Rickard (2022)       |
| G48215  | TrGTerC  | $\text{C813O2} \rightarrow \text{CH}_3\text{COCH}_3 + \text{C512O2}$                           | k1_R02tR02                                  | Rickard (2022)       |
| G48216  | TrGTerCN | $\text{C813O2} + \text{NO} \rightarrow \text{CH}_3\text{COCH}_3 + \text{C512O2} + \text{NO}_2$ | KR02NO                                      | Rickard (2022)*      |
| G48217  | TrGTerC  | $\text{C813O2} + \text{HO}_2 \rightarrow \text{C813OOH}$                                       | k_R02_H02(temp,8)                           | Rickard (2022)       |
| G48218  | TrGTerC  | $\text{C813OOH} + \text{OH} \rightarrow \text{C813O2}$                                         | 1.86E-11                                    | Rickard (2022)       |
| G48219  | TrGTerCN | $\text{C721CHO} + \text{NO}_3 \rightarrow \text{C721CO3} + \text{HNO}_3$                       | KN03AL*8.5                                  | Rickard (2022)       |
| G48220  | TrGTerC  | $\text{C721CHO} + \text{OH} \rightarrow \text{C721CO3}$                                        | 2.63E-11                                    | Rickard (2022)       |
| G48221a | TrGTerC  | $\text{C721CO3} + \text{HO}_2 \rightarrow \text{C721CO3H}$                                     | KAPH02*r_C03_OOH                            | Rickard (2022)       |
| G48221b | TrGTerC  | $\text{C721CO3} + \text{HO}_2 \rightarrow \text{C721O2} + \text{CO}_2 + \text{OH}$             | KAPH02*r_C03_OH                             | Rickard (2022)       |
| G48221c | TrGTerC  | $\text{C721CO3} + \text{HO}_2 \rightarrow \text{NORPINIC} + \text{O}_3$                        | KAPH02*r_C03_O3                             | Rickard (2022)       |
| G48222  | TrGTerCN | $\text{C721CO3} + \text{NO} \rightarrow \text{C721O2} + \text{CO}_2 + \text{NO}_2$             | KAPNO                                       | Rickard (2022)*      |
| G48223  | TrGTerCN | $\text{C721CO3} + \text{NO}_2 \rightarrow \text{C721PAN}$                                      | k_CH3C03_N02                                | Rickard (2022)       |
| G48224  | TrGTerCN | $\text{C721CO3} + \text{NO}_3 \rightarrow \text{C721O2} + \text{CO}_2 + \text{NO}_2$           | KR02N03*1.74                                | Rickard (2022)       |
| G48225  | TrGTerC  | $\text{C721CO3} \rightarrow \text{C721O2} + \text{CO}_2$                                       | k1_R02RC03*0.9                              | Sander et al. (2019) |
| G48226  | TrGTerC  | $\text{C721CO3} \rightarrow \text{NORPINIC}$                                                   | k1_R02RC03*0.1                              | Sander et al. (2019) |
| G48227  | TrGTerC  | $\text{C721CO3H} + \text{OH} \rightarrow \text{C721CO3}$                                       | 9.65E-12                                    | Rickard (2022)       |
| G48228  | TrGTerC  | $\text{NORPINIC} + \text{OH} \rightarrow \text{C721O2} + \text{CO}_2$                          | 6.57E-12                                    | Rickard (2022)       |
| G48229  | TrGTerCN | $\text{C721PAN} + \text{OH} \rightarrow \text{C721OOH} + \text{CO} + \text{NO}_2$              | 2.96E-12                                    | Rickard (2022)       |
| G48230  | TrGTerCN | $\text{C721PAN} \rightarrow \text{C721CO3} + \text{NO}_2$                                      | k_PAN_M                                     | Rickard (2022)       |
| G48231  | TrGTerC  | $\text{C8BC} + \text{OH} \rightarrow \text{C8BCO2}$                                            | 3.04E-12                                    | Rickard (2022)       |
| G48232  | TrGTerC  | $\text{C8BCO2} + \text{HO}_2 \rightarrow \text{C8BCOOH}$                                       | k_R02_H02(temp,8)                           | Rickard (2022)       |
| G48233a | TrGTerCN | $\text{C8BCO2} + \text{NO} \rightarrow \text{C89O2} + \text{NO}_2$                             | KR02N0*(1.-alpha_AN(8,2,0,0,0, temp, cair)) | Rickard (2022)       |
| G48233b | TrGTerCN | $\text{C8BCO2} + \text{NO} \rightarrow \text{C8BCNO3}$                                         | KR02N0*alpha_AN(8,2,0,0,0,temp, cair)       | Rickard (2022)       |
| G48234  | TrGTerC  | $\text{C8BCO2} \rightarrow \text{C89O2}$                                                       | k1_R02sR02                                  | Rickard (2022)       |
| G48235  | TrGTerC  | $\text{C8BCOOH} + \text{OH} \rightarrow \text{C8BCCO} + \text{OH}$                             | 1.62E-11                                    | Rickard (2022)       |
| G48236  | TrGTerCN | $\text{C8BCNO3} + \text{OH} \rightarrow \text{C8BCCO} + \text{NO}_2$                           | 1.84E-12                                    | Rickard (2022)       |
| G48237  | TrGTerC  | $\text{C8BCCO} + \text{OH} \rightarrow \text{C89O2}$                                           | 3.94E-12                                    | Rickard (2022)       |
| G48238  | TrGTerC  | $\text{C89O2} + \text{HO}_2 \rightarrow \text{C89OOH}$                                         | k_R02_H02(temp,8)                           | Rickard (2022)       |

Table 1: Gas phase reactions (... continued)

| #       | labels   | reaction                                                                                                                                                                                                                                                                  | rate coefficient                                                                     | reference       |
|---------|----------|---------------------------------------------------------------------------------------------------------------------------------------------------------------------------------------------------------------------------------------------------------------------------|--------------------------------------------------------------------------------------|-----------------|
| G48239a | TrGTerCN | $\text{C89O2} + \text{NO} \rightarrow \text{C810O2} + \text{NO}_2$                                                                                                                                                                                                        | $\text{KRO2NO} * (1 - \alpha_{\text{AN}}(7, 2, 0, 0, 0, \text{temp}, \text{cair}))$  | Rickard (2022)  |
| G48239b | TrGTerCN | $\text{C89O2} + \text{NO} \rightarrow \text{C89NO3}$                                                                                                                                                                                                                      | $\text{KRO2NO} * \alpha_{\text{AN}}(7, 2, 0, 0, 0, \text{temp}, \text{cair})$        | Rickard (2022)  |
| G48240  | TrGTerCN | $\text{C89O2} + \text{NO}_3 \rightarrow \text{C810O2} + \text{NO}_2$                                                                                                                                                                                                      | KRO2NO3                                                                              | Rickard (2022)  |
| G48241  | TrGTerC  | $\text{C89O2} \rightarrow \text{C810O2}$                                                                                                                                                                                                                                  | k1_R02tR02                                                                           | Rickard (2022)  |
| G48242  | TrGTerC  | $\text{C89OOH} + \text{OH} \rightarrow \text{C89O2}$                                                                                                                                                                                                                      | 3.61E-11                                                                             | Rickard (2022)  |
| G48243  | TrGTerCN | $\text{C89NO3} + \text{OH} \rightarrow \text{CH}_3\text{COCH}_3 + \text{CO13C4CHO} + \text{NO}_2$                                                                                                                                                                         | 2.56E-11                                                                             | Rickard (2022)  |
| G48244  | TrGTerC  | $\text{C810O2} + \text{HO}_2 \rightarrow \text{C810OOH}$                                                                                                                                                                                                                  | k_R02_H02(temp, 8)                                                                   | Rickard (2022)  |
| G48245a | TrGTerCN | $\text{C810O2} + \text{NO} \rightarrow \text{CH}_3\text{COCH}_3 + \text{C514O2} + \text{NO}_2$                                                                                                                                                                            | $\text{KRO2NO} * (1 - \alpha_{\text{AN}}(10, 3, 0, 0, 0, \text{temp}, \text{cair}))$ | Rickard (2022)  |
| G48245b | TrGTerCN | $\text{C810O2} + \text{NO} \rightarrow \text{C810NO3}$                                                                                                                                                                                                                    | $\text{KRO2NO} * \alpha_{\text{AN}}(10, 3, 0, 0, 0, \text{temp}, \text{cair})$       | Rickard (2022)  |
| G48246  | TrGTerCN | $\text{C810O2} + \text{NO}_3 \rightarrow \text{CH}_3\text{COCH}_3 + \text{C514O2} + \text{NO}_2$                                                                                                                                                                          | KRO2NO3                                                                              | Rickard (2022)  |
| G48247  | TrGTerC  | $\text{C810O2} \rightarrow \text{CH}_3\text{COCH}_3 + \text{C514O2}$                                                                                                                                                                                                      | k1_R02tR02                                                                           | Rickard (2022)  |
| G48248  | TrGTerC  | $\text{C810OOH} + \text{OH} \rightarrow \text{C810O2}$                                                                                                                                                                                                                    | 8.35E-11                                                                             | Rickard (2022)  |
| G48249  | TrGTerCN | $\text{C810NO3} + \text{OH} \rightarrow \text{CH}_3\text{COCH}_3 + \text{CO13C4CHO} + \text{NO}_2$                                                                                                                                                                        | 4.96E-11                                                                             | Rickard (2022)  |
| G48400a | TrGAroC  | $\text{LXYL} + \text{OH} \rightarrow \text{TLEPOXMUC} + \text{HO}_2 + \text{LCARBON}$                                                                                                                                                                                     | 0.401E-11                                                                            | Rickard (2022)* |
| G48400b | TrGAroC  | $\text{LXYL} + \text{OH} \rightarrow \text{C6H5CH2O2} + \text{LCARBON}$                                                                                                                                                                                                   | 0.101E-11                                                                            | Rickard (2022)* |
| G48400c | TrGAroC  | $\text{LXYL} + \text{OH} \rightarrow \text{CRESOL} + \text{LCARBON}$                                                                                                                                                                                                      | 0.261E-11                                                                            | Rickard (2022)* |
| G48400d | TrGAroC  | $\text{LXYL} + \text{OH} \rightarrow \text{TLBIPERO2} + \text{HO}_2 + \text{LCARBON}$                                                                                                                                                                                     | 0.932E-11                                                                            | Rickard (2022)* |
| G48401  | TrGAroCN | $\text{LXYL} + \text{NO}_3 \rightarrow \text{C6H5CH2O2} + \text{HNO}_3 + \text{LCARBON}$                                                                                                                                                                                  | 3.9E-16                                                                              | Rickard (2022)* |
| G48402  | TrGAroC  | $\text{EBENZ} + \text{OH} \rightarrow .10 \text{ TLEPOXMUC} + .07 \text{ C6H5CH2O2} + .18 \text{ CRESOL} + .65 \text{ TLBIPERO2} + .28 \text{ HO}_2 + \text{LCARBON}$                                                                                                     | 7.00E-12                                                                             | Rickard (2022)* |
| G48403  | TrGAroCN | $\text{EBENZ} + \text{NO}_3 \rightarrow \text{C6H5CH2O2} + \text{HNO}_3 + \text{LCARBON}$                                                                                                                                                                                 | 1.20E-16                                                                             | Rickard (2022)* |
| G48404  | TrGAroCN | $\text{STYRENE} + \text{NO}_3 \rightarrow \text{NSTYRENO2}$                                                                                                                                                                                                               | 1.50E-12                                                                             | Rickard (2022)  |
| G48405  | TrGAroC  | $\text{STYRENE} + \text{O}_3 \rightarrow .545 \text{ HCHO} + .1 \text{ BENZENE} + .28 \text{ C6H5O2} + .56 \text{ CO} + .36 \text{ OH} + .28 \text{ HO}_2 + .075 \text{ PHCOOH} + .545 \text{ BENZAL} + .09 \text{ H}_2\text{O}_2 + .075 \text{ HCOOH} + .2 \text{ CO}_2$ | 1.70E-17                                                                             | Rickard (2022)* |
| G48406  | TrGAroC  | $\text{STYRENE} + \text{OH} \rightarrow \text{STYRENO2}$                                                                                                                                                                                                                  | 5.80E-11                                                                             | Rickard (2022)  |
| G48407  | TrGAroCN | $\text{NSTYRENO2} + \text{HO}_2 \rightarrow \text{NSTYRENOOH}$                                                                                                                                                                                                            | k_R02_H02(temp, 8)                                                                   | Rickard (2022)  |
| G48408  | TrGAroCN | $\text{NSTYRENO2} + \text{NO} \rightarrow \text{NO}_2 + \text{NO}_2 + \text{HCHO} + \text{BENZAL}$                                                                                                                                                                        | KRO2NO                                                                               | Rickard (2022)* |
| G48409  | TrGAroCN | $\text{NSTYRENO2} + \text{NO}_3 \rightarrow \text{NO}_2 + \text{NO}_2 + \text{HCHO} + \text{BENZAL}$                                                                                                                                                                      | KRO2NO3                                                                              | Rickard (2022)* |
| G48410  | TrGAroCN | $\text{NSTYRENO2} \rightarrow \text{NO}_2 + \text{HCHO} + \text{BENZAL}$                                                                                                                                                                                                  | k1_R02sR02                                                                           | Rickard (2022)* |

Table 1: Gas phase reactions (... continued)

| #       | labels   | reaction                                                                                   | rate coefficient                               | reference                            |
|---------|----------|--------------------------------------------------------------------------------------------|------------------------------------------------|--------------------------------------|
| G48411  | TrGAroCN | NSTYRENOOH + OH $\rightarrow$ NSTYRENO2                                                    | 6.16E-11                                       | Rickard (2022)                       |
| G48412a | TrGAroC  | STYRENO2 + HO <sub>2</sub> $\rightarrow$ STYRENOOH                                         | k_R02_H02(temp,8)*(1.-r_<br>CHOHCH2O2_OH)      | Rickard (2022)                       |
| G48412b | TrGAroC  | STYRENO2 + HO <sub>2</sub> $\rightarrow$ HO <sub>2</sub> + OH + HCHO + BENZAL              | k_R02_H02(temp,8)*r_CHOHCH2O2_OH               | Rickard (2022)*                      |
| G48413  | TrGAroCN | STYRENO2 + NO $\rightarrow$ NO <sub>2</sub> + HO <sub>2</sub> + HCHO + BENZAL              | KR02N0                                         | Rickard (2022)*                      |
| G48414  | TrGAroCN | STYRENO2 + NO <sub>3</sub> $\rightarrow$ NO <sub>2</sub> + HO <sub>2</sub> + HCHO + BENZAL | KR02N03                                        | Rickard (2022)*                      |
| G48415  | TrGAroC  | STYRENO2 $\rightarrow$ HO <sub>2</sub> + HCHO + BENZAL                                     | k1_R02sR02                                     | Rickard (2022)*                      |
| G48416  | TrGAroC  | STYRENOOH + OH $\rightarrow$ STYRENO2                                                      | 6.16E-11                                       | Rickard (2022)                       |
| G49200  | TrGTerC  | C96O2 $\rightarrow$ C97O2                                                                  | k1_R02pR02                                     | Rickard (2022)                       |
| G49201  | TrGTerC  | C96O2 + HO <sub>2</sub> $\rightarrow$ C96OOH                                               | k_R02_H02(temp,9)                              | Rickard (2022)                       |
| G49202a | TrGTerCN | C96O2 + NO $\rightarrow$ C97O2 + NO <sub>2</sub>                                           | KR02N0*(1.-alpha_AN(10,1,0,0,0,<br>temp,cair)) | Rickard (2022)                       |
| G49202b | TrGTerCN | C96O2 + NO $\rightarrow$ C96NO3                                                            | KR02N0*alpha_AN(10,1,0,0,0,<br>temp,cair)      | Rickard (2022)                       |
| G49203  | TrGTerCN | C96NO3 + OH $\rightarrow$ NORPINAL + NO <sub>2</sub>                                       | 2.88E-12                                       | Rickard (2022)                       |
| G49204a | TrGTerC  | C96OOH + OH $\rightarrow$ C96O2                                                            | k_R00HRO                                       | Rickard (2022)                       |
| G49205b | TrGTerC  | C96OOH + OH $\rightarrow$ NORPINAL + OH                                                    | 1.30E-11                                       | Rickard (2022)                       |
| G49206  | TrGTerC  | C97O2 $\rightarrow$ C98O2                                                                  | k1_R02tR02                                     | Rickard (2022)                       |
| G49207  | TrGTerCN | C97O2 + NO $\rightarrow$ C98O2 + NO <sub>2</sub>                                           | KR02N0                                         | Rickard (2022)*                      |
| G49208a | TrGTerC  | C97O2 + HO <sub>2</sub> $\rightarrow$ C97OOH                                               | k_R02_H02(temp,9)*r_COCH2O2_OOH                | Rickard (2022), Sander et al. (2019) |
| G49208b | TrGTerC  | C97O2 + HO <sub>2</sub> $\rightarrow$ C98O2 + OH                                           | k_R02_H02(temp,9)*r_COCH2O2_OH                 | Rickard (2022), Sander et al. (2019) |
| G49209  | TrGTerC  | C97OOH + OH $\rightarrow$ C97O2                                                            | 1.05E-11                                       | Rickard (2022)                       |
| G49210  | TrGTerC  | C98O2 $\rightarrow$ C614O2 + CH <sub>3</sub> COCH <sub>3</sub>                             | k1_R02tR02                                     | Rickard (2022)                       |
| G49211a | TrGTerCN | C98O2 + NO $\rightarrow$ C614O2 + CH <sub>3</sub> COCH <sub>3</sub> + NO <sub>2</sub>      | KR02N0*(1.-alpha_AN(12,3,0,0,0,<br>temp,cair)) | Rickard (2022)                       |
| G49211b | TrGTerCN | C98O2 + NO $\rightarrow$ 9 LCARBON + LNITROGEN                                             | KR02N0*alpha_AN(12,3,0,0,0,<br>temp,cair)      | Rickard (2022)                       |
| G49212  | TrGTerC  | C98O2 + HO <sub>2</sub> $\rightarrow$ C98OOH                                               | k_R02_H02(temp,9)                              | Rickard (2022)                       |
| G49213  | TrGTerC  | C98OOH + OH $\rightarrow$ C98O2                                                            | 2.05E-11                                       | Rickard (2022)                       |
| G49214  | TrGTerC  | NORPINAL + OH $\rightarrow$ C85CO3                                                         | 2.64E-11                                       | Rickard (2022)                       |
| G49215  | TrGTerCN | NORPINAL + NO <sub>3</sub> $\rightarrow$ C85CO3 + HNO <sub>3</sub>                         | KN03AL*8.5                                     | Rickard (2022)                       |
| G49216  | TrGTerC  | C85CO3 $\rightarrow$ C85O2 + CO <sub>2</sub>                                               | k1_R02RCO3                                     | Rickard (2022)                       |
| G49217  | TrGTerCN | C85CO3 + NO $\rightarrow$ C85O2 + CO <sub>2</sub> + NO <sub>2</sub>                        | KAPNO                                          | Rickard (2022)                       |

Table 1: Gas phase reactions (... continued)

| #       | labels   | reaction                                                                                                        | rate coefficient                                              | reference                             |
|---------|----------|-----------------------------------------------------------------------------------------------------------------|---------------------------------------------------------------|---------------------------------------|
| G49218  | TrGTerCN | $\text{C85CO3} + \text{NO}_2 \rightarrow \text{C9PAN2}$                                                         | $k_{\text{CH3CO3\_NO2}}$                                      | Rickard (2022)                        |
| G49219a | TrGTerC  | $\text{C85CO3} + \text{HO}_2 \rightarrow \text{C85CO3H}$                                                        | $\text{KAPH02}*(r_{\text{C03\_00H}}+r_{\text{C03\_03}})$      | Rickard (2022)                        |
| G49219b | TrGTerC  | $\text{C85CO3} + \text{HO}_2 \rightarrow \text{C85O2} + \text{CO}_2 + \text{OH}$                                | $\text{KAPH02}*r_{\text{C03\_OH}}$                            | Rickard (2022)                        |
| G49220  | TrGTerCN | $\text{C9PAN2} \rightarrow \text{C85CO3} + \text{NO}_2$                                                         | $k_{\text{PAN\_M}}$                                           | Rickard (2022)                        |
| G49221  | TrGTerCN | $\text{C9PAN2} + \text{OH} \rightarrow \text{C85OOH} + \text{CO} + \text{NO}_2$                                 | 6.60E-12                                                      | Rickard (2022)                        |
| G49222  | TrGTerC  | $\text{C85CO3H} + \text{OH} \rightarrow \text{C85CO3}$                                                          | 1.02E-11                                                      | Rickard (2022)                        |
| G49223a | TrGTerC  | $\text{C89CO3} \rightarrow .8 \text{ C811CO3} + .2 \text{ C89O2} + .2 \text{ CO}_2$                             | $k1_{\text{R02RC03}*0.9}$                                     | Sander et al. (2019)                  |
| G49223b | TrGTerC  | $\text{C89CO3} \rightarrow \text{C89CO2H}$                                                                      | $k1_{\text{R02RC03}*0.1}$                                     | Sander et al. (2019)                  |
| G49224a | TrGTerC  | $\text{C89CO3} + \text{HO}_2 \rightarrow \text{C89CO3H}$                                                        | $\text{KAPH02}*r_{\text{C03\_00H}}$                           | Rickard (2022)                        |
| G49224b | TrGTerC  | $\text{C89CO3} + \text{HO}_2 \rightarrow \text{C89CO2H} + \text{O}_3$                                           | $\text{KAPH02}*r_{\text{C03\_03}}$                            | Rickard (2022)                        |
| G49224c | TrGTerC  | $\text{C89CO3} + \text{HO}_2 \rightarrow .80 \text{ C811CO3} + .20 \text{ C89O2} + .2 \text{ CO}_2 + \text{OH}$ | $\text{KAPH02}*r_{\text{C03\_OH}}$                            | Rickard (2022)                        |
| G49225  | TrGTerCN | $\text{C89CO3} + \text{NO}_2 \rightarrow \text{C89PAN}$                                                         | $k_{\text{CH3CO3\_NO2}}$                                      | Rickard (2022)                        |
| G49226  | TrGTerCN | $\text{C89CO3} + \text{NO} \rightarrow .8 \text{ C811CO3} + .2 \text{ C89O2} + .2 \text{ CO}_2 + \text{NO}_2$   | KAPNO                                                         | Rickard (2022)                        |
| G49227  | TrGTerC  | $\text{C89CO2H} + \text{OH} \rightarrow .8 \text{ C811CO3} + .2 \text{ C89O2} + .2 \text{ CO}_2$                | 2.69E-11                                                      | Rickard (2022)                        |
| G49228  | TrGTerC  | $\text{C89CO3H} + \text{OH} \rightarrow \text{C89CO3}$                                                          | 3.00E-11                                                      | Rickard (2022)                        |
| G49229  | TrGTerCN | $\text{C89PAN} \rightarrow \text{C89CO3} + \text{NO}_2$                                                         | $k_{\text{PAN\_M}}$                                           | Rickard (2022)                        |
| G49230  | TrGTerCN | $\text{C89PAN} + \text{OH} \rightarrow \text{CH}_3\text{COCH}_3 + \text{CO13C4CHO} + \text{CO} + \text{NO}_2$   | 2.52E-11                                                      | Rickard (2022)                        |
| G49231a | TrGTerC  | $\text{C811CO3} \rightarrow \text{C811O2} + \text{CO}_2$                                                        | $k1_{\text{R02RC03}*0.9}$                                     | Sander et al. (2019)                  |
| G49231b | TrGTerC  | $\text{C811CO3} \rightarrow \text{PINIC}$                                                                       | $k1_{\text{R02RC03}*0.1}$                                     | Sander et al. (2019)                  |
| G49232a | TrGTerC  | $\text{C811CO3} + \text{HO}_2 \rightarrow \text{C811CO3H}$                                                      | $\text{KAPH02}*r_{\text{C03\_00H}}$                           | Rickard (2022)                        |
| G49232b | TrGTerC  | $\text{C811CO3} + \text{HO}_2 \rightarrow \text{PINIC} + \text{O}_3$                                            | $\text{KAPH02}*r_{\text{C03\_03}}$                            | Rickard (2022)                        |
| G49232c | TrGTerC  | $\text{C811CO3} + \text{HO}_2 \rightarrow \text{C811O2} + \text{CO}_2 + \text{OH}$                              | $\text{KAPH02}*r_{\text{C03\_OH}}$                            | Rickard (2022)                        |
| G49233  | TrGTerCN | $\text{C811CO3} + \text{NO} \rightarrow \text{C811O2} + \text{CO}_2 + \text{NO}_2$                              | KAPNO                                                         | Rickard (2022)                        |
| G49234  | TrGTerCN | $\text{C811CO3} + \text{NO}_2 \rightarrow \text{C811PAN}$                                                       | $k_{\text{CH3CO3\_NO2}}$                                      | Rickard (2022)                        |
| G49235  | TrGTerC  | $\text{PINIC} + \text{OH} \rightarrow \text{C811O2} + \text{CO}_2$                                              | 7.29E-12                                                      | Rickard (2022)                        |
| G49236  | TrGTerC  | $\text{NOPINONE} + \text{OH} \rightarrow \text{NOPINDO2}$                                                       | 1.55E-11                                                      | Capouet et al. (2008), Rickard (2022) |
| G49237a | TrGTerC  | $\text{NOPINDO2} + \text{HO}_2 \rightarrow \text{NOPINDOOH}$                                                    | $k_{\text{R02\_H02}}(\text{temp}, 9)*r_{\text{COCH202\_00H}}$ | Rickard (2022), Sander et al. (2019)  |
| G49237b | TrGTerC  | $\text{NOPINDO2} + \text{HO}_2 \rightarrow \text{C89CO3} + \text{OH}$                                           | $k_{\text{R02\_H02}}(\text{temp}, 9)*r_{\text{COCH202\_OH}}$  | Rickard (2022), Sander et al. (2019)  |
| G49238  | TrGTerCN | $\text{NOPINDO2} + \text{NO} \rightarrow \text{C89CO3} + \text{NO}_2$                                           | KR02NO                                                        | Rickard (2022)*                       |

Table 1: Gas phase reactions (... continued)

| #       | labels   | reaction                                                                                        | rate coefficient                                                                   | reference                               |
|---------|----------|-------------------------------------------------------------------------------------------------|------------------------------------------------------------------------------------|-----------------------------------------|
| G49239  | TrGTerC  | NOPINDO2 $\rightarrow$ C89CO3                                                                   | k1_R02p0R02                                                                        | Rickard (2022)                          |
| G49240  | TrGTerC  | NOPINDOOH $\rightarrow$ NOPINDCO                                                                | 2.63E-11                                                                           | Rickard (2022)                          |
| G49241  | TrGTerC  | NOPINDCO + OH $\rightarrow$ C89CO3                                                              | 3.07E-12                                                                           | Rickard (2022)                          |
| G49242  | TrGTerC  | NOPINOO $\rightarrow$ NOPINONE + H <sub>2</sub> O <sub>2</sub>                                  | 6.00E-18*c(ind_H20)                                                                | Rickard (2022)                          |
| G49243  | TrGTerC  | NOPINOO + CO $\rightarrow$ NOPINONE + CO <sub>2</sub>                                           | 1.2E-15                                                                            | Rickard (2022)                          |
| G49244  | TrGTerCN | NOPINOO + NO $\rightarrow$ NOPINONE + NO <sub>2</sub>                                           | 1.E-14                                                                             | Rickard (2022)                          |
| G49245  | TrGTerCN | NOPINOO + NO <sub>2</sub> $\rightarrow$ NOPINONE + NO <sub>3</sub>                              | 1.E-15                                                                             | Rickard (2022)                          |
| G49246  | TrGTerC  | NORPINENOL + OH $\rightarrow$ HCOOH + OH + C86O2                                                | k_CH2CHOH_OH_HCOOH                                                                 | Sander et al. (2019), So et al. (2014)* |
| G49247  | TrGTerC  | NORPINENOL + HCOOH $\rightarrow$ NORPINAL + HCOOH                                               | k_CH2CHOH_HCOOH                                                                    | Sander et al. (2019), da Silva (2010)*  |
| G49248  | TrGTerC  | NORPINAL + HCOOH $\rightarrow$ NORPINENOL + HCOOH                                               | k_ALD_HCOOH                                                                        | Sander et al. (2019), da Silva (2010)*  |
| G49249  | TrGTerC  | C811CO3H + OH $\rightarrow$ C811CO3                                                             | 1.04E-11                                                                           | Rickard (2022)                          |
| G49250  | TrGTerCN | C811PAN $\rightarrow$ C811CO3 + NO <sub>2</sub>                                                 | k_PAN_M                                                                            | Rickard (2022)                          |
| G49251  | TrGTerCN | C811PAN + OH $\rightarrow$ C721CHO + CO + NO <sub>2</sub>                                       | 6.77E-12                                                                           | Rickard (2022)                          |
| G49400a | TrGAroC  | LTMB + OH $\rightarrow$ TLEPOXMUC + HO <sub>2</sub> + 2 LCARBON                                 | 0.827E-11                                                                          | Rickard (2022)*                         |
| G49400b | TrGAroC  | LTMB + OH $\rightarrow$ C6H5CH2O2 + 2 LCARBON                                                   | 0.189E-11                                                                          | Rickard (2022)*                         |
| G49400c | TrGAroC  | LTMB + OH $\rightarrow$ CRESOL + 2 LCARBON                                                      | 0.141E-11                                                                          | Rickard (2022)*                         |
| G49400d | TrGAroC  | LTMB + OH $\rightarrow$ TLBIPERO2 + HO <sub>2</sub> + 2 LCARBON                                 | 2.917E-11                                                                          | Rickard (2022)*                         |
| G49401  | TrGAroCN | LTMB + NO <sub>3</sub> $\rightarrow$ C6H5CH2O2 + HNO <sub>3</sub> + 2 LCARBON                   | 1.52E-15                                                                           | Rickard (2022)*                         |
| G40200  | TrGTerC  | APINENE + OH $\rightarrow$ .75 LAPINABO2 + .15 MENTHEN6ONE + .15 HO <sub>2</sub> + .10 ROO6R1O2 | 1.2E-11*EXP(440./temp)                                                             | Atkinson et al. (2006)*                 |
| G40201a | TrGTerCN | LAPINABO2 + NO $\rightarrow$ PINAL + HO <sub>2</sub> + NO <sub>2</sub>                          | KR02NO*(1-(.65*alpha_AN(11,3,0,0,0,temp,cair)+.35*alpha_AN(11,2,0,0,0,temp,cair))) | Rickard (2022), Sander et al. (2019)    |
| G40201b | TrGTerCN | LAPINABO2 + NO $\rightarrow$ LAPINABNO3                                                         | KR02NO*(.65*alpha_AN(11,3,0,0,0,temp,cair)+.35*alpha_AN(11,2,0,0,0,temp,cair))     | Rickard (2022), Sander et al. (2019)    |
| G40202a | TrGTerC  | LAPINABO2 + HO <sub>2</sub> $\rightarrow$ LAPINABOOH                                            | k_R02_H02(temp,10)*(1-r_CHOCH2O2_OH)                                               | Rickard (2022), Sander et al. (2019)    |
| G40202b | TrGTerC  | LAPINABO2 + HO <sub>2</sub> $\rightarrow$ PINAL + HO <sub>2</sub> + OH                          | k_R02_H02(temp,10)*r_CHOCH2O2_OH                                                   | Rickard (2022), Sander et al. (2019)    |
| G40203  | TrGTerC  | LAPINABO2 $\rightarrow$ PINAL + HO <sub>2</sub>                                                 | R02*(0.65*k1_R02t0R02+.35*k1_R02s0R02)                                             | Rickard (2022)*                         |

Table 1: Gas phase reactions (... continued)

| #       | labels   | reaction                                                                                     | rate coefficient                                  | reference                            |
|---------|----------|----------------------------------------------------------------------------------------------|---------------------------------------------------|--------------------------------------|
| G40204  | TrGTerC  | LAPINABOOH + OH $\rightarrow$ .35 LAPINABO2 + .65 C96CO3                                     | 2.77E-11                                          | Rickard (2022)*                      |
| G40205  | TrGTerCN | LAPINABNO3 + OH $\rightarrow$ .35 PINAL + .65 C96CO3 + NO <sub>2</sub>                       | 4.29E-12                                          | Rickard (2022)*                      |
| G40206  | TrGTerC  | MENTHEN6ONE + OH $\rightarrow$ OHMENTHEN6ONEO2                                               | 6.46E-11                                          | Vereecken et al. (2007)*             |
| G40207  | TrGTerCN | OHMENTHEN6ONEO2 + NO $\rightarrow$ 2OHMENTHEN6ONE + HO <sub>2</sub> + NO <sub>2</sub>        | KR02NO                                            | Vereecken et al. (2007)*             |
| G40208  | TrGTerC  | OHMENTHEN6ONEO2 + HO <sub>2</sub> $\rightarrow$ 2OHMENTHEN6ONE                               | k_R02_H02(temp,10)                                | Vereecken et al. (2007)              |
| G40209  | TrGTerC  | OHMENTHEN6ONEO2 $\rightarrow$ 2OHMENTHEN6ONE + HO <sub>2</sub>                               | k1_R02t0R02                                       | Vereecken et al. (2007)              |
| G40210  | TrGTerC  | 2OHMENTHEN6ONE + OH $\rightarrow$ 10 LCARBON                                                 | 1E-11                                             | Vereecken et al. (2007)              |
| G40211  | TrGTerC  | PINAL + OH $\rightarrow$ .772 C96CO3 + .228 PINALO2                                          | 5.2E-12*EXP(600./temp)                            | Wallington et al. (2018)*            |
| G40212  | TrGTerCN | PINAL + NO <sub>3</sub> $\rightarrow$ C96CO3 + HNO <sub>3</sub>                              | 2.0E-14                                           | Wallington et al. (2018)*            |
| G40213a | TrGTerC  | C96CO3 $\rightarrow$ C96O2 + CO <sub>2</sub>                                                 | k1_R02RC03*0.9                                    | Rickard (2022)                       |
| G40213b | TrGTerC  | C96CO3 $\rightarrow$ PINONIC                                                                 | k1_R02RC03*0.1                                    | Rickard (2022)                       |
| G40214a | TrGTerC  | C96CO3 + HO <sub>2</sub> $\rightarrow$ PERPINONIC                                            | KAPH02*r_C03_00H                                  | Rickard (2022)                       |
| G40214b | TrGTerC  | C96CO3 + HO <sub>2</sub> $\rightarrow$ PINONIC + O <sub>3</sub>                              | KAPH02*r_C03_03                                   | Rickard (2022)                       |
| G40214c | TrGTerC  | C96CO3 + HO <sub>2</sub> $\rightarrow$ C96O2 + OH + CO <sub>2</sub>                          | KAPH02*r_C03_0H                                   | Rickard (2022)                       |
| G40215  | TrGTerCN | C96CO3 + NO <sub>2</sub> $\rightarrow$ C10PAN2                                               | k_CH3C03_N02                                      | Rickard (2022)                       |
| G40216  | TrGTerCN | C96CO3 + NO $\rightarrow$ C96O2 + NO <sub>2</sub> + CO <sub>2</sub>                          | KAPNO                                             | Rickard (2022)                       |
| G40217  | TrGTerCN | C96CO3 + NO <sub>3</sub> $\rightarrow$ C96O2 + NO <sub>2</sub> + CO <sub>2</sub>             | KR02NO3*1.74                                      | Rickard (2022)                       |
| G40218  | TrGTerCN | C10PAN2 $\rightarrow$ C96CO3 + NO <sub>2</sub>                                               | k_PAN_M                                           | Rickard (2022)                       |
| G40219  | TrGTerCN | C10PAN2 + OH $\rightarrow$ NORPINAL + CO + NO <sub>2</sub>                                   | 3.66E-12                                          | Rickard (2022)                       |
| G40220  | TrGTerC  | PINONIC + OH $\rightarrow$ C96O2 + CO <sub>2</sub>                                           | 6.65E-12                                          | Rickard (2022)                       |
| G40221  | TrGTerC  | PERPINONIC + OH $\rightarrow$ C96CO3                                                         | 9.73E-12                                          | Rickard (2022)                       |
| G40222  | TrGTerC  | PINALO2 + HO <sub>2</sub> $\rightarrow$ PINALOOH                                             | k_R02_H02(temp,10)                                | Rickard (2022)                       |
| G40223a | TrGTerCN | PINALO2 + NO $\rightarrow$ C106O2 + NO <sub>2</sub>                                          | KR02NO*(1.-alpha_AN(12,3,0,1,0, temp, cair))      | Rickard (2022), Sander et al. (2019) |
| G40223b | TrGTerCN | PINALO2 + NO $\rightarrow$ PINALNO3                                                          | KR02NO*alpha_AN(12,3,0,1,0, temp, cair)           | Rickard (2022), Sander et al. (2019) |
| G40224  | TrGTerC  | PINALO2 $\rightarrow$ C106O2                                                                 | k1_R02tR02                                        | Rickard (2022)                       |
| G40225  | TrGTerC  | PINALOOH + OH $\rightarrow$ PINALO2                                                          | 2.75E-11                                          | Rickard (2022)                       |
| G40226  | TrGTerCN | PINALNO3 + OH $\rightarrow$ CO235C6CHO + CH <sub>3</sub> COCH <sub>3</sub> + NO <sub>2</sub> | 2.25E-11                                          | Rickard (2022)                       |
| G40227  | TrGTerC  | C106O2 + HO <sub>2</sub> $\rightarrow$ C106OOH                                               | k_R02_H02(temp,10)                                | Rickard (2022)                       |
| G40228a | TrGTerCN | C106O2 + NO $\rightarrow$ C716O2 + CH <sub>3</sub> COCH <sub>3</sub> + NO <sub>2</sub>       | KR02NO*0.875*(1.-alpha_AN(13,3,0,0,0,temp, cair)) | Rickard (2022), Sander et al. (2019) |



Table 1: Gas phase reactions (... continued)

| #       | labels   | reaction                                                                                                                               | rate coefficient                                              | reference                            |
|---------|----------|----------------------------------------------------------------------------------------------------------------------------------------|---------------------------------------------------------------|--------------------------------------|
| G40228b | TrGTerCN | C106O2 + NO → C106NO3                                                                                                                  | KR02N0*0.875*alpha_AN(13,3,0,0,0,temp,cair)                   | Rickard (2022), Sander et al. (2019) |
| G40229  | TrGTerC  | C106O2 → C716O2 + CH <sub>3</sub> COCH <sub>3</sub>                                                                                    | k1_R02tR02                                                    | Rickard (2022)                       |
| G40230  | TrGTerC  | C106OOH + OH → C106O2                                                                                                                  | 8.01E-11                                                      | Rickard (2022)                       |
| G40231  | TrGTerCN | C106NO3 + OH → CO235C6CHO + CH <sub>3</sub> COCH <sub>3</sub> + NO <sub>2</sub>                                                        | 7.03E-11                                                      | Rickard (2022)                       |
| G40232  | TrGTerC  | APINENE + O <sub>3</sub> → .09 APINBOO + .08 PINONIC + .77 OH + .33 NORPINAL + .33 CO + .33 HO <sub>2</sub> + .06 APINAOO + .44 C109O2 | 8.05E-16*EXP(-640./temp)                                      | Wallington et al. (2018)*            |
| G40233  | TrGTerC  | APINAOO → PINAL + H <sub>2</sub> O <sub>2</sub>                                                                                        | 1.00E-17*c(ind_H2O)                                           | Rickard (2022)                       |
| G40234  | TrGTerC  | APINAOO + CO → PINAL + CO <sub>2</sub>                                                                                                 | 1.20E-15                                                      | Rickard (2022)                       |
| G40235  | TrGTerCN | APINAOO + NO → PINAL + NO <sub>2</sub>                                                                                                 | 1.00E-14                                                      | Rickard (2022)                       |
| G40236  | TrGTerCN | APINAOO + NO <sub>2</sub> → PINAL + NO <sub>3</sub>                                                                                    | 1.00E-15                                                      | Rickard (2022)                       |
| G40237a | TrGTerC  | APINBOO → PINONIC                                                                                                                      | 1.00E-17*c(ind_H2O)*(0.08+0.15)                               | Rickard (2022)                       |
| G40237b | TrGTerC  | APINBOO → PINAL + H <sub>2</sub> O <sub>2</sub>                                                                                        | 1.00E-17*c(ind_H2O)*0.77                                      | Rickard (2022)                       |
| G40238  | TrGTerC  | APINBOO + CO → PINAL + CO <sub>2</sub>                                                                                                 | 1.20E-15                                                      | Rickard (2022)                       |
| G40239  | TrGTerCN | APINBOO + NO → PINAL + NO <sub>2</sub>                                                                                                 | 1.00E-14                                                      | Rickard (2022)                       |
| G40240  | TrGTerCN | APINBOO + NO <sub>2</sub> → PINAL + NO <sub>3</sub>                                                                                    | 1.00E-15                                                      | Rickard (2022)                       |
| G40241  | TrGTerC  | C109O2 → C89CO3 + HCHO                                                                                                                 | k1_R02pOR02                                                   | Rickard (2022)                       |
| G40242  | TrGTerCN | C109O2 + NO → C89CO3 + HCHO + NO <sub>2</sub>                                                                                          | KR02N0                                                        | Rickard (2022)*                      |
| G40243a | TrGTerC  | C109O2 + HO <sub>2</sub> → C109OOH                                                                                                     | k_R02_H02(temp,10)*r_COCH202_OOH                              | Rickard (2022), Sander et al. (2019) |
| G40243b | TrGTerC  | C109O2 + HO <sub>2</sub> → C89CO3 + HCHO + OH                                                                                          | k_R02_H02(temp,10)*r_COCH202_OH                               | Rickard (2022), Sander et al. (2019) |
| G40244  | TrGTerC  | C109OOH + OH → C109CO + OH                                                                                                             | 5.47E-11                                                      | Rickard (2022)                       |
| G40245  | TrGTerC  | C109CO + OH → C89CO3 + CO                                                                                                              | 5.47E-11                                                      | Rickard (2022)                       |
| G40246  | TrGTerCN | APINENE + NO <sub>3</sub> → LNAPINABO2                                                                                                 | 1.2E-12*EXP(490./temp)                                        | Wallington et al. (2018)*            |
| G40247  | TrGTerCN | LNAPINABO2 → PINAL + NO <sub>2</sub>                                                                                                   | (0.65*k1_R02tR02 + 0.35*k1_R02sR02)                           | Rickard (2022)                       |
| G40248  | TrGTerCN | LNAPINABO2 + NO → PINAL + NO <sub>2</sub> + NO <sub>2</sub>                                                                            | KR02N0                                                        | Rickard (2022)*                      |
| G40249  | TrGTerCN | LNAPINABO2 + HO <sub>2</sub> → LNAPINABOOH                                                                                             | k_R02_H02(temp,10)                                            | Rickard (2022)                       |
| G40250  | TrGTerCN | LNAPINABO2 + NO <sub>3</sub> → PINAL + NO <sub>2</sub> + NO <sub>2</sub>                                                               | KR02N03                                                       | Rickard (2022)                       |
| G40251  | TrGTerCN | LNAPINABOOH + OH → LNAPINABO2                                                                                                          | (.65*6.87E-12+.35*1.23E-11)                                   | Rickard (2022)                       |
| G40252a | TrGTerC  | BPINENE + OH → BPINAO2                                                                                                                 | 1.47E-11*EXP(467./temp)<br>*(0.8326*0.3+0.068)/(0.8326+0.068) | Gill and Hites (2002)*               |

Table 1: Gas phase reactions (... continued)

| #       | labels   | reaction                                                                                                         | rate coefficient                                                                                    | reference                                      |
|---------|----------|------------------------------------------------------------------------------------------------------------------|-----------------------------------------------------------------------------------------------------|------------------------------------------------|
| G40252b | TrGTerC  | BPINENE + OH $\rightarrow$ ROO6R1O2                                                                              | $1.47\text{E}-11 \cdot \text{EXP}(467./\text{temp})$<br>$\cdot 0.8326 \cdot 0.7 / (0.8326 + 0.068)$ | Gill and Hites (2002)*                         |
| G40253a | TrGTerC  | BPINAO2 + HO <sub>2</sub> $\rightarrow$ BPINAOOH                                                                 | $k_{\text{R02\_H02}}(\text{temp}, 10) \cdot r_{\text{COCH202\_00H}}$                                | Rickard (2022), Sander et al. (2019)           |
| G40253b | TrGTerC  | BPINAO2 + HO <sub>2</sub> $\rightarrow$ NOPINONE + HCHO + HO <sub>2</sub> + OH                                   | $k_{\text{R02\_H02}}(\text{temp}, 10) \cdot r_{\text{COCH202\_OH}}$                                 | Rickard (2022), Sander et al. (2019)           |
| G40254a | TrGTerCN | BPINAO2 + NO $\rightarrow$ NOPINONE + HCHO + HO <sub>2</sub> + NO <sub>2</sub>                                   | $\text{KR02N0} \cdot (1 - \alpha_{\text{AN}}(11, 3, 0, 0, 0, \text{temp}, \text{cair}))$            | Rickard (2022), Sander et al. (2019)           |
| G40254b | TrGTerCN | BPINAO2 + NO $\rightarrow$ BPINANO3                                                                              | $\text{KR02N0} \cdot \alpha_{\text{AN}}(11, 3, 0, 0, 0, \text{temp}, \text{cair})$                  | Rickard (2022), Sander et al. (2019)           |
| G40255  | TrGTerC  | BPINAO2 $\rightarrow$ NOPINONE + HCHO + HO <sub>2</sub>                                                          | $k1_{\text{R02tOR02}}$                                                                              | Rickard (2022)                                 |
| G40256  | TrGTerC  | BPINAOOH + OH $\rightarrow$ BPINAO2                                                                              | $1.33\text{E}-11$                                                                                   | Rickard (2022)                                 |
| G40257  | TrGTerCN | BPINANO3 + OH $\rightarrow$ NOPINONE + HCHO + NO <sub>2</sub>                                                    | $4.70\text{E}-12$                                                                                   | Rickard (2022)                                 |
| G40258a | TrGTerCN | ROO6R1O2 + NO $\rightarrow$ ROO6R3O2 + CH <sub>3</sub> COCH <sub>3</sub> + NO <sub>2</sub>                       | $\text{KR02N0} \cdot (1 - \alpha_{\text{AN}}(13, 3, 0, 0, 0, \text{temp}, \text{cair}))$            | Vereecken and Peeters (2012)                   |
| G40258b | TrGTerCN | ROO6R1O2 + NO $\rightarrow$ ROO6R1NO3                                                                            | $\text{KR02N0} \cdot \alpha_{\text{AN}}(13, 3, 0, 0, 0, \text{temp}, \text{cair})$                  | Vereecken and Peeters (2012)                   |
| G40259  | TrGTerC  | ROO6R1O2 + HO <sub>2</sub> $\rightarrow$ 10 LCARBON                                                              | $k_{\text{R02\_H02}}(\text{temp}, 10)$                                                              | Vereecken and Peeters (2012)*                  |
| G40260  | TrGTerC  | ROO6R1O2 $\rightarrow$ ROO6R3O2 + CH <sub>3</sub> COCH <sub>3</sub>                                              | $k1_{\text{R02tOR02}}$                                                                              | Vereecken and Peeters (2012)                   |
| G40261a | TrGTerCN | RO6R1O2 + NO $\rightarrow$ RO6R3O2 + NO <sub>2</sub>                                                             | $\text{KR02N0} \cdot (1 - \alpha_{\text{AN}}(12, 3, 0, 0, 0, \text{temp}, \text{cair}))$            | Vereecken and Peeters (2012)                   |
| G40261b | TrGTerCN | RO6R1O2 + NO $\rightarrow$ RO6R1NO3                                                                              | $\text{KR02N0} \cdot \alpha_{\text{AN}}(12, 3, 0, 0, 0, \text{temp}, \text{cair})$                  | Vereecken and Peeters (2012)                   |
| G40262  | TrGTerC  | RO6R1O2 + HO <sub>2</sub> $\rightarrow$ 10 LCARBON                                                               | $k_{\text{R02\_H02}}(\text{temp}, 10)$                                                              | Vereecken and Peeters (2012)*                  |
| G40263  | TrGTerC  | RO6R1O2 $\rightarrow$ RO6R3O2                                                                                    | $k1_{\text{R02sOR02}}$                                                                              | Vereecken and Peeters (2012)                   |
| G40264a | TrGTerCN | RO6R3O2 + NO $\rightarrow$ 9 LCARBON + HCHO + HO <sub>2</sub> + NO <sub>2</sub>                                  | $\text{KR02N0} \cdot (1 - \alpha_{\text{AN}}(12, 3, 0, 0, 0, \text{temp}, \text{cair}))$            | Vereecken and Peeters (2012)                   |
| G40264b | TrGTerCN | RO6R3O2 + NO $\rightarrow$ 10 LCARBON + LNITROGEN                                                                | $\text{KR02N0} \cdot \alpha_{\text{AN}}(12, 3, 0, 0, 0, \text{temp}, \text{cair})$                  | Vereecken and Peeters (2012)                   |
| G40265  | TrGTerC  | RO6R3O2 + HO <sub>2</sub> $\rightarrow$ 10 LCARBON                                                               | $k_{\text{R02\_H02}}(\text{temp}, 10)$                                                              | Vereecken and Peeters (2012)                   |
| G40266  | TrGTerC  | RO6R3O2 $\rightarrow$ 9 LCARBON + HCHO + HO <sub>2</sub>                                                         | $k1_{\text{R02sR02}}$                                                                               | Vereecken and Peeters (2012)*                  |
| G40267a | TrGTerC  | BPINENE + O <sub>3</sub> $\rightarrow$ NOPINONE + .63 CO + .37 CH <sub>2</sub> OO + .16 OH + .16 HO <sub>2</sub> | $1.35\text{E}-15 \cdot \text{EXP}(-1270./\text{temp})$<br>$\cdot 0.051 / (1 - .027)$                | Wallington et al. (2018)*                      |
| G40267b | TrGTerC  | BPINENE + O <sub>3</sub> $\rightarrow$ NOPINOO + CO <sub>2</sub>                                                 | $1.35\text{E}-15 \cdot \text{EXP}(-1270./\text{temp})$<br>$\cdot 0.368 / (1 - .027)$                | Nguyen et al. (2009), Wallington et al. (2018) |

Table 1: Gas phase reactions (... continued)

| #       | labels   | reaction                                                                           | rate coefficient                                              | reference                                            |
|---------|----------|------------------------------------------------------------------------------------|---------------------------------------------------------------|------------------------------------------------------|
| G40267c | TrGTerC  | BPINENE + O <sub>3</sub> → NOPINDO2 + CO <sub>2</sub> + OH                         | 1.35E-15*EXP(-1270./temp)<br>*.283/(1.-.027)                  | Nguyen et al. (2009), Wallington et al. (2018)       |
| G40267d | TrGTerC  | BPINENE + O <sub>3</sub> → C8BC + 2 CO <sub>2</sub>                                | 1.35E-15*EXP(-1270./temp)<br>*(.104+.167)/(1.-.027)           | Nguyen et al. (2009), Wallington et al. (2018)       |
| G40268  | TrGTerCN | BPINENE + NO <sub>3</sub> → LNBPINABO2                                             | 2.51E-12                                                      | Wallington et al. (2018)*                            |
| G40269  | TrGTerCN | LNBPINABO2 + HO <sub>2</sub> → LNBPINABOOH                                         | k_R02_H02(temp,10)                                            | Rickard (2022)                                       |
| G40270  | TrGTerCN | LNBPINABO2 + NO → NOPINONE + HCHO + NO <sub>2</sub> + NO <sub>2</sub>              | KR02NO                                                        | Rickard (2022)*                                      |
| G40271  | TrGTerCN | LNBPINABO2 + NO <sub>3</sub> → NOPINONE + HCHO + NO <sub>2</sub> + NO <sub>2</sub> | KR02NO3                                                       | Rickard (2022)                                       |
| G40272a | TrGTerCN | LNBPINABO2 → NOPINONE + HCHO + NO <sub>2</sub>                                     | k1_R02tR02*0.7                                                | Rickard (2022)                                       |
| G40272b | TrGTerCN | LNBPINABO2 → BPINANO3                                                              | k1_R02tR02*0.3                                                | Rickard (2022)                                       |
| G40273  | TrGTerCN | LNBPINABOOH + OH → LNBPINABO2                                                      | 9.58E-12                                                      | Rickard (2022)                                       |
| G40274  | TrGTerCN | ROO6R1NO3 + OH → ROO6R3O2 + CH <sub>3</sub> COCH <sub>3</sub> + NO <sub>2</sub>    | 9.16E-13                                                      | Vereecken and Peeters (2012), Gill and Hites (2002)* |
| G40275  | TrGTerCN | RO6R1NO3 + OH → 9 LCARBON + HCHO + HO <sub>2</sub> + NO <sub>2</sub>               | 9.16E-13                                                      | Vereecken and Peeters (2012), Gill and Hites (2002)  |
| G40276  | TrGTerC  | PINEOL + OH → HCOOH + OH + NORPINAL                                                | k_CH2CHOH_OH_HCOOH                                            | Sander et al. (2019), So et al. (2014)*              |
| G40277  | TrGTerC  | PINEOL + HCOOH → PINAL + HCOOH                                                     | k_CH2CHOH_HCOOH                                               | Sander et al. (2019), da Silva (2010)*               |
| G40278  | TrGTerC  | PINAL + HCOOH → PINEOL + HCOOH                                                     | k_ALD_HCOOH                                                   | Sander et al. (2019), da Silva (2010)*               |
| G40279a | TrGC     | CARENE + OH → LAPINABO2                                                            | 8.8E-11*(.50+.25)                                             | Atkinson and Arey (2003)                             |
| G40279b | TrGC     | CARENE + OH → MENTHEN6ONE + HO <sub>2</sub>                                        | 8.8E-11*.25*.60                                               | Atkinson and Arey (2003)                             |
| G40279c | TrGC     | CARENE + OH → ROO6R1O2                                                             | 8.8E-11*.25*.40                                               | Atkinson and Arey (2003)                             |
| G40280a | TrGC     | CARENE + O <sub>3</sub> → APINBOO                                                  | 3.7E-17*.50*.18                                               | Atkinson and Arey (2003)                             |
| G40280b | TrGC     | CARENE + O <sub>3</sub> → PINONIC                                                  | 3.7E-17*.50*.16                                               | Atkinson and Arey (2003)                             |
| G40280c | TrGC     | CARENE + O <sub>3</sub> → OH + NORPINAL + CO + HO <sub>2</sub>                     | 3.7E-17*.50*.66                                               | Atkinson and Arey (2003)                             |
| G40280d | TrGC     | CARENE + O <sub>3</sub> → APINA00                                                  | 3.7E-17*.50*.12                                               | Atkinson and Arey (2003)                             |
| G40280e | TrGC     | CARENE + O <sub>3</sub> → OH + C109O2                                              | 3.7E-17*.50*(.22+.66)                                         | Atkinson and Arey (2003)                             |
| G40281  | TrGCN    | CARENE + NO <sub>3</sub> → LNAPINABO2                                              | 9.1E-12                                                       | Atkinson and Arey (2003)                             |
| G40282a | TrGTerC  | SABINENE + OH → BPINA02                                                            | 1.47E-11*EXP(467./temp)<br>*(0.8326*0.3+0.068)/(0.8326+0.068) | Gill and Hites (2002)*                               |

Table 1: Gas phase reactions (... continued)

| #       | labels    | reaction                                                                                                                     | rate coefficient                                              | reference                                               |
|---------|-----------|------------------------------------------------------------------------------------------------------------------------------|---------------------------------------------------------------|---------------------------------------------------------|
| G40282b | TrGTerC   | SABINENE + OH $\rightarrow$ ROO6R1O2                                                                                         | 1.47E-11*EXP(467./temp)<br>*0.8326*0.7/(0.8326+0.068)         | Vereecken and Peeters (2012),<br>Gill and Hites (2002)* |
| G40283a | TrGTerC   | SABINENE + O <sub>3</sub> $\rightarrow$ NOPINONE + .63 CO + .37<br>HOCH <sub>2</sub> OOH + .16 OH + .16 HO <sub>2</sub>      | 1.35E-15*EXP(-1270./temp)<br>*.051/(1.-.027)                  | Wallington et al. (2018)*                               |
| G40283b | TrGTerC   | SABINENE + O <sub>3</sub> $\rightarrow$ NOPINOO + CO <sub>2</sub>                                                            | 1.35E-15*EXP(-1270./temp)<br>*.368/(1.-.027)                  | Nguyen et al. (2009), Wallington<br>et al. (2018)       |
| G40283c | TrGTerC   | SABINENE + O <sub>3</sub> $\rightarrow$ NOPINDO2 + CO <sub>2</sub> + OH                                                      | 1.35E-15*EXP(-1270./temp)<br>*.283/(1.-.027)                  | Nguyen et al. (2009), Wallington<br>et al. (2018)       |
| G40283d | TrGTerC   | SABINENE + O <sub>3</sub> $\rightarrow$ C8BC + 2 CO <sub>2</sub>                                                             | 1.35E-15*EXP(-1270./temp)<br>*(.104+.167)/(1.-.027)           | Nguyen et al. (2009), Wallington<br>et al. (2018)       |
| G40284  | TrGTerCN  | SABINENE + NO <sub>3</sub> $\rightarrow$ LNBPINABO2                                                                          | 2.51E-12                                                      | Wallington et al. (2018)*                               |
| G40285a | TrGTerC   | CAMPHENE + OH $\rightarrow$ BPINAO2                                                                                          | 1.47E-11*EXP(467./temp)<br>*(0.8326*0.3+0.068)/(0.8326+0.068) | Gill and Hites (2002)*                                  |
| G40285b | TrGTerC   | CAMPHENE + OH $\rightarrow$ ROO6R1O2                                                                                         | 1.47E-11*EXP(467./temp)<br>*0.8326*0.7/(0.8326+0.068)         | Vereecken and Peeters (2012),<br>Gill and Hites (2002)* |
| G40286a | TrGTerC   | CAMPHENE + O <sub>3</sub> $\rightarrow$ NOPINONE + .63 CO + .37<br>HOCH <sub>2</sub> OOH + .16 OH + .16 HO <sub>2</sub>      | 1.35E-15*EXP(-1270./temp)<br>*.051/(1.-.027)                  | Wallington et al. (2018)*                               |
| G40286b | TrGTerC   | CAMPHENE + O <sub>3</sub> $\rightarrow$ NOPINOO + CO <sub>2</sub>                                                            | 1.35E-15*EXP(-1270./temp)<br>*.368/(1.-.027)                  | Nguyen et al. (2009), Wallington<br>et al. (2018)       |
| G40286c | TrGTerC   | CAMPHENE + O <sub>3</sub> $\rightarrow$ NOPINDO2 + CO <sub>2</sub> + OH                                                      | 1.35E-15*EXP(-1270./temp)<br>*.283/(1.-.027)                  | Nguyen et al. (2009), Wallington<br>et al. (2018)       |
| G40286d | TrGTerC   | CAMPHENE + O <sub>3</sub> $\rightarrow$ C8BC + 2 CO <sub>2</sub>                                                             | 1.35E-15*EXP(-1270./temp)<br>*(.104+.167)/(1.-.027)           | Nguyen et al. (2009), Wallington<br>et al. (2018)       |
| G40287  | TrGTerCN  | CAMPHENE + NO <sub>3</sub> $\rightarrow$ LNBPINABO2                                                                          | 2.51E-12                                                      | Wallington et al. (2018)*                               |
| G40400  | TrGAroC   | LHAROM + OH $\rightarrow$ .14 TLEPOXMUC + .03 C6H5CH2O2<br>+ .04 CRESOL + .79 TLBIPERO2 + .18 HO <sub>2</sub> + 4<br>LCARBON | 5.67E-11                                                      | Rickard (2022)*                                         |
| G40401  | TrGAroCN  | LHAROM + NO <sub>3</sub> $\rightarrow$ C6H5CH2O2 + HNO <sub>3</sub> + 4<br>LCARBON                                           | 2.60E-15                                                      | Rickard (2022)*                                         |
| G6100   | UpStTrGCl | Cl + O <sub>3</sub> $\rightarrow$ ClO + O <sub>2</sub>                                                                       | 2.8E-11*EXP(-250./temp)                                       | Atkinson et al. (2007)                                  |
| G6102a  | StTrGCl   | ClO + ClO $\rightarrow$ Cl <sub>2</sub> + O <sub>2</sub>                                                                     | 1.0E-12*EXP(-1590./temp)                                      | Atkinson et al. (2007)                                  |
| G6102b  | StTrGCl   | ClO + ClO $\rightarrow$ 2 Cl + O <sub>2</sub>                                                                                | 3.0E-11*EXP(-2450./temp)                                      | Atkinson et al. (2007)                                  |
| G6102c  | StTrGCl   | ClO + ClO $\rightarrow$ Cl + OClO                                                                                            | 3.5E-13*EXP(-1370./temp)                                      | Atkinson et al. (2007)                                  |
| G6102d  | StTrGCl   | ClO + ClO $\rightarrow$ Cl <sub>2</sub> O <sub>2</sub>                                                                       | k_ClO_ClO                                                     | Burkholder et al. (2015)                                |

Table 1: Gas phase reactions (... continued)

| #       | labels     | reaction                                                                                              | rate coefficient                                                                                  | reference                 |
|---------|------------|-------------------------------------------------------------------------------------------------------|---------------------------------------------------------------------------------------------------|---------------------------|
| G6103   | StTrGCl    | $\text{Cl}_2\text{O}_2 \rightarrow \text{ClO} + \text{ClO}$                                           | $k_{\text{ClO}_2\text{ClO}}/(2.16\text{E-}27*\text{EXP}(8537./\text{temp}))$                      | Burkholder et al. (2015)* |
| G69MS   | StTrGCl    | $\text{ClO} + \text{OClO} \rightarrow \text{Cl}_2\text{O}_3$                                          | 1.2E-12                                                                                           | Atkinson et al. (2007)    |
| G699MS  | StTrGCl    | $\text{Cl} + \text{Cl}_2\text{O} \rightarrow \text{Cl}_2 + \text{ClO}$                                | $6.2\text{E-}11*\text{EXP}(130./\text{temp})$                                                     | Atkinson et al. (2007)    |
| G6202   | StTrGCl    | $\text{Cl} + \text{H}_2\text{O}_2 \rightarrow \text{HCl} + \text{HO}_2$                               | $1.1\text{E-}11*\text{EXP}(-980./\text{temp})$                                                    | Atkinson et al. (2007)    |
| G6204   | StTrGCl    | $\text{ClO} + \text{HO}_2 \rightarrow \text{HOCl} + \text{O}_2$                                       | $2.2\text{E-}12*\text{EXP}(340./\text{temp})$                                                     | Atkinson et al. (2007)*   |
| G6205   | StTrGCl    | $\text{HCl} + \text{OH} \rightarrow \text{Cl} + \text{H}_2\text{O}$                                   | $1.7\text{E-}12*\text{EXP}(-230./\text{temp})$                                                    | Atkinson et al. (2007)    |
| G67MS   | StTrGCl    | $\text{Cl}_2 + \text{OH} \rightarrow \text{HOCl} + \text{Cl}$                                         | $3.6\text{E-}12*\text{EXP}(-1200./\text{temp})$                                                   | Atkinson et al. (2007)    |
| G6300   | UpStTrGCIN | $\text{ClO} + \text{NO} \rightarrow \text{NO}_2 + \text{Cl}$                                          | $6.2\text{E-}12*\text{EXP}(295./\text{temp})$                                                     | Atkinson et al. (2007)    |
| G6301   | StTrGCIN   | $\text{ClO} + \text{NO}_2 \rightarrow \text{ClNO}_3$                                                  | $k_{\text{3rd\_iupac}}(\text{temp}, \text{cair}, 1.6\text{E-}31, 3.4, 7\text{E-}11, 0., 0.4)$     | Atkinson et al. (2007)    |
| G6302   | TrGCIN     | $\text{ClNO}_3 \rightarrow \text{ClO} + \text{NO}_2$                                                  | $6.918\text{E-}7*\text{EXP}(-10909./\text{temp})*\text{cair}$                                     | Anderson and Fahey (1990) |
| G6304   | StTrGCIN   | $\text{ClNO}_3 + \text{Cl} \rightarrow \text{Cl}_2 + \text{NO}_3$                                     | $6.2\text{E-}12*\text{EXP}(145./\text{temp})$                                                     | Atkinson et al. (2007)    |
| G63MS   | UpStTrGCIN | $\text{Cl} + \text{NO} \rightarrow \text{ClNO}$                                                       | $7.7\text{E-}32*(\text{temp}/298.)**(-1.80)*\text{cair}$                                          | Burkholder et al. (2019)  |
| G64MS   | UpStTrGCIN | $\text{Cl} + \text{NO}_2 \rightarrow \text{ClONO}$                                                    | 1.6E-11                                                                                           | Burkholder et al. (2015)  |
| G65MS   | UpStTrGCIN | $\text{Cl} + \text{NO}_2 \rightarrow \text{ClNO}_2$                                                   | 3.6E-12                                                                                           | Burkholder et al. (2015)  |
| G66MS   | UpStTrGCIN | $\text{Cl} + \text{NO}_3 \rightarrow \text{ClO} + \text{NO}_2$                                        | 2.4E-11                                                                                           | Burkholder et al. (2019)  |
| G68MS   | StTrGCIN   | $\text{ClNO}_2 + \text{OH} \rightarrow \text{HOCl} + \text{NO}_2$                                     | $2.4\text{E-}12*\text{EXP}(-1250./\text{temp})$                                                   | Atkinson et al. (2007)    |
| G688MS  | UpStTrGCIN | $\text{OClO} + \text{NO} \rightarrow \text{NO}_2 + \text{ClO}$                                        | $1.1\text{E-}13*\text{EXP}(350./\text{temp})$                                                     | Atkinson et al. (2007)    |
| G6400   | StTrGCl    | $\text{Cl} + \text{CH}_4 \rightarrow \text{HCl} + \text{CH}_3$                                        | $6.6\text{E-}12*\text{EXP}(-1240./\text{temp})$                                                   | Atkinson et al. (2006)    |
| G6400MS | TrGCCl     | $\text{Cl} + \text{C}_3\text{H}_8 \rightarrow \text{iC}_3\text{H}_7\text{O}_2 + \text{HCl}$           | $1.4\text{E-}10*0.43*\text{EXP}(75./\text{temp})$                                                 | Rickard (2022)            |
| G6401MS | TrGCCl     | $\text{Cl} + \text{C}_3\text{H}_8 \rightarrow \text{C}_3\text{H}_7\text{O}_2 + \text{HCl}$            | $1.4\text{E-}10*0.59*\text{EXP}(-90./\text{temp})$                                                | Rickard (2022)            |
| G6402MS | TrGCCl     | $\text{Cl} + \text{iC}_4\text{H}_{10} \rightarrow \text{IC}_4\text{H}_9\text{O}_2 + \text{HCl}$       | 1.43E-10*0.564                                                                                    | Rickard (2022)            |
| G6403MS | TrGCCl     | $\text{Cl} + \text{iC}_4\text{H}_{10} \rightarrow \text{TC}_4\text{H}_9\text{O}_2 + \text{HCl}$       | 1.43E-10*0.436                                                                                    | Rickard (2022)            |
| G6404MS | TrGCCl     | $\text{Cl} + \text{C}_4\text{H}_{10} \rightarrow \text{LC}_4\text{H}_9\text{O}_2 + \text{HCl}$        | 2.05E-10                                                                                          | Atkinson et al. (2006)    |
| G6401   | StTrGCl    | $\text{Cl} + \text{HCHO} \rightarrow \text{HCl} + \text{CO} + \text{HO}_2$                            | $8.1\text{E-}11*\text{EXP}(-34./\text{temp})$                                                     | Atkinson et al. (2006)    |
| G6402   | StTrGCl    | $\text{Cl} + \text{CH}_3\text{OOH} \rightarrow \text{HCHO} + \text{HCl} + \text{OH}$                  | 5.9E-11                                                                                           | Atkinson et al. (2006)*   |
| G6403   | StTrGCl    | $\text{ClO} + \text{CH}_3\text{O}_2 \rightarrow \text{HO}_2 + \text{Cl} + \text{HCHO}$                | $1.8\text{E-}12*\text{EXP}(-600./\text{temp})$                                                    | Burkholder et al. (2015)  |
| G6408   | StTrGCCl   | $\text{CH}_3\text{CCl}_3 + \text{OH} \rightarrow 2 \text{LCARBON} + \text{H}_2\text{O} + 3 \text{Cl}$ | $1.64\text{E-}12*\text{EXP}(-1520./\text{temp})$                                                  | Burkholder et al. (2015)  |
| G6409   | TrGCCl     | $\text{Cl} + \text{C}_2\text{H}_4 \rightarrow \text{HOCH}_2\text{CH}_2\text{O}_2 + \text{HCl}$        | $k_{\text{3rd\_iupac}}(\text{temp}, \text{cair}, 1.85\text{E-}29, 3.3, 6.0\text{E-}10, 0.0, 0.4)$ | Atkinson et al. (2006)*   |
| G6410   | TrGCCl     | $\text{Cl} + \text{CH}_3\text{CHO} \rightarrow \text{HCl} + \text{CH}_3\text{C}(\text{O})$            | 8.0e-11                                                                                           | Atkinson et al. (2006)    |
| G6411   | TrGCCl     | $\text{C}_2\text{H}_2 + \text{Cl} \rightarrow \text{LCARBON} + \text{CH}_3 + \text{HCl}$              | $k_{\text{3rd\_iupac}}(\text{temp}, \text{cair}, 6.1\text{e-}30, 3.0, 2.0\text{e-}10, 0., 0.6)$   | Atkinson et al. (2006)    |
| G6412   | TrGCCl     | $\text{C}_2\text{H}_6 + \text{Cl} \rightarrow \text{C}_2\text{H}_5\text{O}_2 + \text{HCl}$            | $8.3\text{E-}11*\text{EXP}(-100./\text{temp})$                                                    | Atkinson et al. (2006)    |

Table 1: Gas phase reactions (... continued)

| #      | labels   | reaction                                                                                                                             | rate coefficient                                                                                      | reference                                                           |
|--------|----------|--------------------------------------------------------------------------------------------------------------------------------------|-------------------------------------------------------------------------------------------------------|---------------------------------------------------------------------|
| G6413  | StTrGClN | $\text{Cl} + \text{CH}_3\text{ONO}_2 \rightarrow \text{HCl} + \text{HCHO} + \text{NO}_2$                                             | $1.3\text{E}-11 \cdot \text{EXP}(-1200./\text{temp})$                                                 | Burkholder et al. (2015)                                            |
| G6414  | StTrGClN | $\text{Cl} + \text{CH}_3\text{ONO} \rightarrow \text{HCl} + \text{HCHO} + \text{NO}$                                                 | $2.1\text{E}-12$                                                                                      | Sokolov et al. (1999)                                               |
| G6415  | StTrGCl  | $\text{Cl} + \text{CH}_3\text{O}_2 \rightarrow .5 \text{ClO} + .5 \text{CH}_3\text{O} + .5 \text{HCl} + .5 \text{CH}_2\text{OO}$     | $1.6\text{E}-10$                                                                                      | Burkholder et al. (2015)                                            |
| G6416  | TrGCClN  | $\text{Cl} + \text{CH}_3\text{CN} \rightarrow \text{NCCH}_2\text{O}_2 + \text{HCl}$                                                  | $1.6\text{E}-11 \cdot \text{EXP}(-2104./\text{temp})$                                                 | Tyndall et al. (1996), Tyndall et al. (2001b), Sander et al. (2019) |
| G641MS | StTrGCCl | $\text{Cl} + \text{BENZENE} \rightarrow \text{C}_6\text{H}_5\text{O}_2 + \text{HCl}$                                                 | $1.3\text{E}-16$                                                                                      | Sokolov et al. (1998)                                               |
| G642MS | StTrGCCl | $\text{Cl} + \text{TOLUENE} \rightarrow \text{C}_6\text{H}_5\text{CH}_2\text{O}_2 + \text{HCl}$                                      | $6.2\text{E}-11$                                                                                      | Wang et al. (2005)                                                  |
| G692MS | StTrGCCl | $\text{Cl} + \text{LXYL} \rightarrow \text{C}_6\text{H}_5\text{CH}_2\text{O}_2 + \text{LCARBON} + \text{HCl}$                        | $1.5\text{E}-10$                                                                                      | Shi and Bernhard (1997)                                             |
| G643DT | TrGCCl   | $\text{Cl} + \text{C}_5\text{H}_8 \rightarrow .63 \text{ LISOPAB} + .30 \text{ LISOPCD} + .07 \text{ LISOPEFO}_2 + \text{HCl}$       | $7.6\text{E}-11 \cdot \text{EXP}(500./\text{temp}) * 1.1 \cdot \text{EXP}(-595./\text{temp})$         | Wennberg et al. (2018)*                                             |
| G644DT | TrGCCl   | $\text{Cl} + \text{C}_5\text{H}_8 \rightarrow .63 \text{ LISOPAB} + .30 \text{ LISOPCD} + .07 \text{ LISOPEFO}_2 + \text{LCHLORINE}$ | $7.6\text{E}-11 \cdot \text{EXP}(500./\text{temp}) * (1. - 1.1 \cdot \text{EXP}(-595./\text{temp}))$  | Wennberg et al. (2018)*                                             |
| G645DT | StTrGCl  | $\text{Cl} + \text{CH}_3\text{OH} \rightarrow \text{HOCH}_2\text{O}_2 + \text{HCl}$                                                  | $7.1\text{E}-11 \cdot \text{EXP}(-75./\text{temp})$                                                   | Atkinson et al. (2006)                                              |
| G646DT | StTrGCCl | $\text{Cl} + \text{C}_2\text{H}_5\text{OH} \rightarrow \text{HOCH}_2\text{CH}_2\text{O}_2 + \text{HCl}$                              | $6.0\text{E}-11 \cdot \text{EXP}(155./\text{temp}) * 0.28 \cdot \text{EXP}(-350./\text{temp})$        | Atkinson et al. (2006)                                              |
| G647DT | StTrGCCl | $\text{Cl} + \text{C}_2\text{H}_5\text{OH} \rightarrow \text{C}_2\text{H}_5\text{O}_2 + \text{HCl}$                                  | $6.0\text{E}-11 \cdot \text{EXP}(155./\text{temp}) * (1. - 0.28 \cdot \text{EXP}(-350./\text{temp}))$ | Atkinson et al. (2006)                                              |
| G648DT | StTrGCCl | $\text{Cl} + \text{HOCH}_2\text{CHO} \rightarrow \text{HOCHCHO} + \text{HCl}$                                                        | $8.0\text{E}-12/0.9 * 0.35$                                                                           | Niki et al. (1987), Atkinson et al. (2006)                          |
| G649DT | StTrGCCl | $\text{Cl} + \text{HOCH}_2\text{CHO} \rightarrow \text{HOCH}_2\text{CO} + \text{HCl}$                                                | $8.0\text{E}-12/0.9 * (1. - 0.35)$                                                                    | Niki et al. (1987), Atkinson et al. (2006)                          |
| G650DT | StTrGCCl | $\text{Cl} + \text{GLYOX} \rightarrow \text{HCOCO} + \text{HCl}$                                                                     | $3.8\text{E}-11$                                                                                      | Niki et al. (1985)                                                  |
| G651DT | StTrGCCl | $\text{Cl} + \text{MGLYOX} \rightarrow \text{CH}_3\text{C}(\text{O}) + \text{CO} + \text{HCl}$                                       | $4.8\text{E}-11$                                                                                      | Green et al. (1990)                                                 |
| G652DT | StTrGCCl | $\text{Cl} + \text{C}_2\text{H}_5\text{CHO} \rightarrow \text{C}_2\text{H}_5\text{CO}_3 + \text{HCl}$                                | $1.3\text{E}-10$                                                                                      | Atkinson et al. (2006)*                                             |
| G653DT | StTrGCCl | $\text{Cl} + \text{CH}_3\text{COCH}_3 \rightarrow \text{CH}_3\text{COCH}_2\text{O}_2 + \text{HCl}$                                   | $1.5\text{E}-11 \cdot \text{EXP}(-590./\text{temp})$                                                  | Atkinson et al. (2006)                                              |
| G654DT | StTrGCCl | $\text{Cl} + \text{MEK} \rightarrow \text{LMEKO}_2 + \text{HCl}$                                                                     | $3.05\text{E}-11 \cdot \text{EXP}(80./\text{temp})$                                                   | Atkinson et al. (2006)*                                             |
| G655MS | StTrGCCl | $\text{Cl} + \text{BENZAL} \rightarrow \text{C}_6\text{H}_5\text{CO}_3 + \text{HCl}$                                                 | $1.0\text{E}-10$                                                                                      | Thiault et al. (2002)                                               |
| G7100  | StTrGBr  | $\text{Br} + \text{O}_3 \rightarrow \text{BrO} + \text{O}_2$                                                                         | $1.7\text{E}-11 \cdot \text{EXP}(-800./\text{temp})$                                                  | Atkinson et al. (2007)                                              |
| G7102a | StTrGBr  | $\text{BrO} + \text{BrO} \rightarrow 2 \text{Br} + \text{O}_2$                                                                       | $2.7\text{E}-12$                                                                                      | Atkinson et al. (2007)                                              |
| G7102b | StTrGBr  | $\text{BrO} + \text{BrO} \rightarrow \text{Br}_2 + \text{O}_2$                                                                       | $2.9\text{E}-14 \cdot \text{EXP}(840./\text{temp})$                                                   | Atkinson et al. (2007)                                              |
| G7200  | StTrGBr  | $\text{Br} + \text{HO}_2 \rightarrow \text{HBr} + \text{O}_2$                                                                        | $7.7\text{E}-12 \cdot \text{EXP}(-450./\text{temp})$                                                  | Atkinson et al. (2007)                                              |
| G7201  | StTrGBr  | $\text{BrO} + \text{HO}_2 \rightarrow \text{HOBr} + \text{O}_2$                                                                      | $4.5\text{E}-12 \cdot \text{EXP}(500./\text{temp})$                                                   | Atkinson et al. (2007)                                              |
| G7202  | StTrGBr  | $\text{HBr} + \text{OH} \rightarrow \text{Br} + \text{H}_2\text{O}$                                                                  | $6.7\text{E}-12 \cdot \text{EXP}(155./\text{temp})$                                                   | Atkinson et al. (2007)                                              |

Table 1: Gas phase reactions (... continued)

| #      | labels    | reaction                                                                                                                                     | rate coefficient                                                                                                                                                                   | reference                                              |
|--------|-----------|----------------------------------------------------------------------------------------------------------------------------------------------|------------------------------------------------------------------------------------------------------------------------------------------------------------------------------------|--------------------------------------------------------|
| G7204  | StTrGBr   | $\text{Br}_2 + \text{OH} \rightarrow \text{HOBr} + \text{Br}$                                                                                | $2.0\text{E}-11 \cdot \text{EXP}(240./\text{temp})$                                                                                                                                | Atkinson et al. (2007)                                 |
| G7300  | TrGBrN    | $\text{Br} + \text{BrNO}_3 \rightarrow \text{Br}_2 + \text{NO}_3$                                                                            | $4.9\text{E}-11$                                                                                                                                                                   | Orlando and Tyndall (1996)                             |
| G7301  | StTrGBrN  | $\text{BrO} + \text{NO} \rightarrow \text{Br} + \text{NO}_2$                                                                                 | $8.7\text{E}-12 \cdot \text{EXP}(260./\text{temp})$                                                                                                                                | Atkinson et al. (2007)                                 |
| G7302  | StTrGBrN  | $\text{BrO} + \text{NO}_2 \rightarrow \text{BrNO}_3$                                                                                         | k_BrO_NO2                                                                                                                                                                          | Atkinson et al. (2007)*                                |
| G7303  | TrGBrN    | $\text{BrNO}_3 \rightarrow \text{BrO} + \text{NO}_2$                                                                                         | $k_{\text{BrO\_NO2}} / (5.44\text{E}-9 \cdot \text{EXP}(14192./\text{temp}) \cdot 1.\text{E}6 \cdot R_{\text{gas}} \cdot \text{temp} / (\text{atm}2\text{Pa} \cdot N_{\text{A}}))$ | Orlando and Tyndall (1996),<br>Atkinson et al. (2007)* |
| G7400  | StTrGBr   | $\text{Br} + \text{HCHO} \rightarrow \text{HBr} + \text{CO} + \text{HO}_2$                                                                   | $7.7\text{E}-12 \cdot \text{EXP}(-580./\text{temp})$                                                                                                                               | Atkinson et al. (2006)                                 |
| G7401  | TrGBr     | $\text{Br} + \text{CH}_3\text{OOH} \rightarrow \text{CH}_3\text{O}_2 + \text{HBr}$                                                           | $2.6\text{E}-12 \cdot \text{EXP}(-1600./\text{temp})$                                                                                                                              | Kondo and Benson (1984)                                |
| G7402  | TrGBr     | $\text{BrO} + \text{CH}_3\text{O}_2 \rightarrow \text{HOBr} + \text{CH}_2\text{OO}$                                                          | $2.42\text{E}-14 \cdot \text{EXP}(1617./\text{temp})$                                                                                                                              | Shallcross et al. (2015)                               |
| G7403  | StTrGBr   | $\text{CH}_3\text{Br} + \text{OH} \rightarrow \text{LCARBON} + \text{H}_2\text{O} + \text{Br}$                                               | $1.42\text{E}-12 \cdot \text{EXP}(-1150./\text{temp})$                                                                                                                             | Burkholder et al. (2015)                               |
| G7404  | TrGBrC    | $\text{Br} + \text{C}_2\text{H}_4 \rightarrow \text{HOCH}_2\text{CH}_2\text{O}_2 + \text{HBr}$                                               | $2.8\text{E}-13 \cdot \text{EXP}(224./\text{temp}) / (1. + 1.13\text{E}24 \cdot \text{EXP}(-3200./\text{temp}) / C(\text{ind\_O2}))$                                               | Atkinson et al. (2006)*                                |
| G7405  | TrGBrC    | $\text{Br} + \text{CH}_3\text{CHO} \rightarrow \text{HBr} + \text{CH}_3\text{C}(\text{O})$                                                   | $1.8\text{E}-11 \cdot \text{EXP}(-460./\text{temp})$                                                                                                                               | Atkinson et al. (2006)                                 |
| G7406  | TrGBrC    | $\text{Br} + \text{C}_2\text{H}_2 \rightarrow \text{LCARBON} + \text{CH}_3\text{O}_2 + \text{HBr}$                                           | $6.35\text{E}-15 \cdot \text{EXP}(440./\text{temp})$                                                                                                                               | Atkinson et al. (2006)                                 |
| G7407  | TrGBr     | $\text{CHBr}_3 + \text{OH} \rightarrow \text{LCARBON} + \text{H}_2\text{O} + 3 \text{ Br}$                                                   | $9.0\text{E}-13 \cdot \text{EXP}(-360./\text{temp})$                                                                                                                               | Burkholder et al. (2015)*                              |
| G7408  | TrGBr     | $\text{CH}_2\text{Br}_2 + \text{OH} \rightarrow \text{LCARBON} + \text{H}_2\text{O} + 2 \text{ Br}$                                          | $2.0\text{E}-12 \cdot \text{EXP}(-840./\text{temp})$                                                                                                                               | Burkholder et al. (2015)*                              |
| G7600  | TrGBrCl   | $\text{Br} + \text{BrCl} \rightarrow \text{Br}_2 + \text{Cl}$                                                                                | $3.32\text{E}-15$                                                                                                                                                                  | Manion et al. (2015)                                   |
| G7601  | TrGBrCl   | $\text{Br} + \text{Cl}_2 \rightarrow \text{BrCl} + \text{Cl}$                                                                                | $1.10\text{E}-15$                                                                                                                                                                  | Dolson and Leone (1987)                                |
| G7602  | TrGBrCl   | $\text{Br}_2 + \text{Cl} \rightarrow \text{BrCl} + \text{Br}$                                                                                | $2.3\text{E}-10 \cdot \text{EXP}(135./\text{temp})$                                                                                                                                | Bedjanian et al. (1998)                                |
| G7603a | StTrGBrCl | $\text{BrO} + \text{ClO} \rightarrow \text{Br} + \text{OClO}$                                                                                | $1.6\text{E}-12 \cdot \text{EXP}(430./\text{temp})$                                                                                                                                | Atkinson et al. (2007)                                 |
| G7603b | StTrGBrCl | $\text{BrO} + \text{ClO} \rightarrow \text{Br} + \text{Cl} + \text{O}_2$                                                                     | $2.9\text{E}-12 \cdot \text{EXP}(220./\text{temp})$                                                                                                                                | Atkinson et al. (2007)                                 |
| G7603c | StTrGBrCl | $\text{BrO} + \text{ClO} \rightarrow \text{BrCl} + \text{O}_2$                                                                               | $5.8\text{E}-13 \cdot \text{EXP}(170./\text{temp})$                                                                                                                                | Atkinson et al. (2007)                                 |
| G7604  | TrGBrCl   | $\text{BrCl} + \text{Cl} \rightarrow \text{Br} + \text{Cl}_2$                                                                                | $1.45\text{E}-11$                                                                                                                                                                  | Clyne and Cruse (1972)                                 |
| G7605  | TrGBrCl   | $\text{CHCl}_2\text{Br} + \text{OH} \rightarrow \text{LCARBON} + 2 \text{ Cl} + \text{H}_2\text{O} + \text{Br}$                              | $2.0\text{E}-12 \cdot \text{EXP}(-840./\text{temp})$                                                                                                                               | see note*                                              |
| G7606  | TrGBrCl   | $\text{CHClBr}_2 + \text{OH} \rightarrow \text{LCARBON} + \text{Cl} + \text{H}_2\text{O} + 2 \text{ Br}$                                     | $2.0\text{E}-12 \cdot \text{EXP}(-840./\text{temp})$                                                                                                                               | see note*                                              |
| G7607  | TrGBrCl   | $\text{CH}_2\text{ClBr} + \text{OH} \rightarrow \text{LCARBON} + \text{Cl} + \text{H}_2\text{O} + \text{Br}$                                 | $2.1\text{E}-12 \cdot \text{EXP}(-880./\text{temp})$                                                                                                                               | Burkholder et al. (2015)*                              |
| G9200  | StTrGS    | $\text{SO}_2 + \text{OH} \rightarrow \text{H}_2\text{SO}_4 + \text{HO}_2$                                                                    | $k_{3\text{rd}}(\text{temp}, \text{cair}, 3.3\text{E}-31, 4.3, 1.6\text{E}-12, 0., 0.6)$                                                                                           | Burkholder et al. (2015)                               |
| G9400a | TrGCS     | $\text{DMS} + \text{OH} \rightarrow \text{CH}_3\text{SO}_2 + \text{HCHO}$                                                                    | $1.13\text{E}-11 \cdot \text{EXP}(-253./\text{temp})$                                                                                                                              | Atkinson et al. (2004)*                                |
| G9400b | TrGCS     | $\text{DMS} + \text{OH} \rightarrow \text{DMSO} + \text{HO}_2$                                                                               | k_DMS_OH                                                                                                                                                                           | Atkinson et al. (2004)*                                |
| G9401  | TrGCNS    | $\text{DMS} + \text{NO}_3 \rightarrow \text{CH}_3\text{SO}_2 + \text{HNO}_3 + \text{HCHO}$                                                   | $1.9\text{E}-13 \cdot \text{EXP}(520./\text{temp})$                                                                                                                                | Atkinson et al. (2004)                                 |
| G9402  | TrGCS     | $\text{DMSO} + \text{OH} \rightarrow .6 \text{ SO}_2 + \text{HCHO} + .6 \text{ CH}_3 + .4 \text{ HO}_2 + .4 \text{ CH}_3\text{SO}_3\text{H}$ | $1.\text{E}-10$                                                                                                                                                                    | Hynes and Wine (1996)*                                 |

Table 1: Gas phase reactions (... continued)

| #     | labels   | reaction                                                                               | rate coefficient                                     | reference                                |
|-------|----------|----------------------------------------------------------------------------------------|------------------------------------------------------|------------------------------------------|
| G9403 | TrGS     | $\text{CH}_3\text{SO}_2 \rightarrow \text{SO}_2 + \text{CH}_3$                         | $1.8\text{E}13 \cdot \text{EXP}(-8661./\text{temp})$ | Barone et al. (1995)                     |
| G9404 | TrGS     | $\text{CH}_3\text{SO}_2 + \text{O}_3 \rightarrow \text{CH}_3\text{SO}_3$               | 3.E-13                                               | Barone et al. (1995)                     |
| G9405 | TrGS     | $\text{CH}_3\text{SO}_3 + \text{HO}_2 \rightarrow \text{CH}_3\text{SO}_3\text{H}$      | 5.E-11                                               | Barone et al. (1995)                     |
| G9408 | StTrGS   | $\text{CH}_2\text{OO} + \text{SO}_2 \rightarrow \text{H}_2\text{SO}_4 + \text{HCHO}$   | k_CH200_SO2                                          | Welz et al. (2012), Stone et al. (2014)* |
| G9409 | TrGTerCS | $\text{NOPINOO} + \text{SO}_2 \rightarrow \text{NOPINONE} + \text{H}_2\text{SO}_4$     | 7.E-14                                               | Rickard (2022)                           |
| G9410 | TrGTerCS | $\text{APINAOO} + \text{SO}_2 \rightarrow \text{PINAL} + \text{H}_2\text{SO}_4$        | 7.00E-14                                             | Rickard (2022)                           |
| G9411 | TrGTerCS | $\text{APINBOO} + \text{SO}_2 \rightarrow \text{PINAL} + \text{H}_2\text{SO}_4$        | 7.00E-14                                             | Rickard (2022)                           |
| G9412 | TrGTerCS | $\text{MBOOO} + \text{SO}_2 \rightarrow \text{IBUTALOH} + \text{H}_2\text{SO}_4$       | 7.00E-14                                             | Rickard (2022)                           |
| G9600 | TrGCClS  | $\text{DMS} + \text{Cl} \rightarrow \text{CH}_3\text{SO}_2 + \text{HCl} + \text{HCHO}$ | 3.3E-10                                              | Atkinson et al. (2004)                   |
| G9700 | TrGBrCS  | $\text{DMS} + \text{Br} \rightarrow \text{CH}_3\text{SO}_2 + \text{HBr} + \text{HCHO}$ | $9.\text{E}-11 \cdot \text{EXP}(-2386./\text{temp})$ | Jefferson et al. (1994)                  |
| G9701 | TrGBrCS  | $\text{DMS} + \text{BrO} \rightarrow \text{DMSO} + \text{Br}$                          | 4.4E-13                                              | Ingham et al. (1999)                     |



## General notes

### Three-body reactions

Rate coefficients for three-body reactions are defined via the function **k\_3rd**( $T, M, k_0^{300}, n, k_{\text{inf}}^{300}, m, f_c$ ). In the code, the temperature  $T$  is called **temp** and the concentration of “air molecules”  $M$  is called **cair**. Using the auxiliary variables  $k_0(T)$ ,  $k_{\text{inf}}(T)$ , and  $k_{\text{ratio}}$ , **k\_3rd** is defined as:

$$k_0(T) = k_0^{300} \times \left(\frac{300\text{K}}{T}\right)^n \quad (1)$$

$$k_{\text{inf}}(T) = k_{\text{inf}}^{300} \times \left(\frac{300\text{K}}{T}\right)^m \quad (2)$$

$$k_{\text{ratio}} = \frac{k_0(T)M}{k_{\text{inf}}(T)} \quad (3)$$

$$\mathbf{k\_3rd} = \frac{k_0(T)M}{1 + k_{\text{ratio}}} \times f_c^{\left(\frac{1}{1 + (\log_{10}(k_{\text{ratio}}))^2}\right)} \quad (4)$$

A similar function, called **k\_3rd\_iupac** here, is used by Wallington et al. (2018) for three-body reactions. It has the same function parameters as **k\_3rd** and it is defined as:

$$k_0(T) = k_0^{300} \times \left(\frac{300\text{K}}{T}\right)^n \quad (5)$$

$$k_{\text{inf}}(T) = k_{\text{inf}}^{300} \times \left(\frac{300\text{K}}{T}\right)^m \quad (6)$$

$$k_{\text{ratio}} = \frac{k_0(T)M}{k_{\text{inf}}(T)} \quad (7)$$

$$N = 0.75 - 1.27 \times \log_{10}(f_c) \quad (8)$$

$$\mathbf{k\_3rd\_iupac} = \frac{k_0(T)M}{1 + k_{\text{ratio}}} \times f_c^{\left(\frac{1}{1 + (\log_{10}(k_{\text{ratio}})/N)^2}\right)} \quad (9)$$

## Structure-Activity Relationships (SAR)

Some unmeasured rate coefficients are estimated with structure-activity relationships, using the following parameters and substituent factors:

| $k$ for H-abstraction by OH in $\text{cm}^{-3}\text{s}^{-1}$ |                                                                     |
|--------------------------------------------------------------|---------------------------------------------------------------------|
| <b>k_p</b>                                                   | $4.49 \times 10^{-18} \times (T/\text{K})^2 \exp(-320 \text{ K}/T)$ |
| <b>k_s</b>                                                   | $4.50 \times 10^{-18} \times (T/\text{K})^2 \exp(253 \text{ K}/T)$  |
| <b>k_t</b>                                                   | $2.12 \times 10^{-18} \times (T/\text{K})^2 \exp(696 \text{ K}/T)$  |
| <b>k_ROHRO</b>                                               | $2.1 \times 10^{-18} \times (T/\text{K})^2 \exp(-85 \text{ K}/T)$   |
| <b>k_CO2H</b>                                                | $0.7 \times k_{\text{CH}_3\text{CO}_2\text{H}+\text{OH}}$           |
| <b>k_ROOHRO</b>                                              | $0.6 \times k_{\text{CH}_3\text{OOH}+\text{OH}}$                    |
| <b>f_alk</b>                                                 | 1.23                                                                |
| <b>f_sOH</b>                                                 | 3.44                                                                |
| <b>f_tOH</b>                                                 | 2.68                                                                |
| <b>f_sOOH</b>                                                | 8.                                                                  |
| <b>f_tOOH</b>                                                | 8.                                                                  |
| <b>f_ONO2</b>                                                | 0.04                                                                |
| <b>f_CH2ON02</b>                                             | 0.20                                                                |
| <b>f_cpan</b>                                                | 0.25                                                                |
| <b>f_allyl</b>                                               | 3.6                                                                 |
| <b>f_CHO</b>                                                 | 0.55                                                                |
| <b>f_CO2H</b>                                                | 1.67                                                                |
| <b>f_CO</b>                                                  | 0.73                                                                |
| <b>f_O</b>                                                   | 8.15                                                                |
| <b>f_pCH2OH</b>                                              | 1.29                                                                |
| <b>f_tCH2OH</b>                                              | 0.53                                                                |

| $k$ for OH-addition to double bonds in $\text{cm}^{-3}\text{s}^{-1}$ |                                                                                                                    |
|----------------------------------------------------------------------|--------------------------------------------------------------------------------------------------------------------|
| <b>k_adp</b>                                                         | $4.5 \times 10^{-12} \times (T/300 \text{ K})^{-0.85}$                                                             |
| <b>k_ads</b>                                                         | $1/4 \times (1.1 \times 10^{-11} \times \exp(485 \text{ K}/T) + 1.0 \times 10^{-11} \times \exp(553 \text{ K}/T))$ |
| <b>k_adt</b>                                                         | $1.922 \times 10^{-11} \times \exp(450 \text{ K}/T) - k_{\text{ads}}$                                              |
| <b>k_adsecprim</b>                                                   | $3.0 \times 10^{-11}$                                                                                              |
| <b>k_adtertprim</b>                                                  | $5.7 \times 10^{-11}$                                                                                              |
| <b>a_PAN</b>                                                         | 0.56                                                                                                               |
| <b>a_CHO</b>                                                         | 0.31                                                                                                               |
| <b>a_COCH3</b>                                                       | 0.76                                                                                                               |
| <b>a_CH2OH</b>                                                       | 1.7                                                                                                                |
| <b>a_CH2OOH</b>                                                      | 1.7                                                                                                                |
| <b>a_COH</b>                                                         | 2.2                                                                                                                |
| <b>a_COOH</b>                                                        | 2.2                                                                                                                |
| <b>a_CO2H</b>                                                        | 0.25                                                                                                               |
| <b>a_CH2ON02</b>                                                     | 0.64                                                                                                               |

### RO<sub>2</sub> self and cross reactions

The self and cross reactions of organic peroxy radicals are treated according to the permutation reaction formalism as implemented in the MCM (Rickard, 2022), as described by Jenkin et al. (1997). Every organic peroxy radical reacts in a pseudo-first-order reaction with a rate constant that is expressed as  $k^{\text{1st}} = 2 \times \sqrt{k_{\text{self}} \times \mathbf{k\_CH302}} \times [\text{RO}_2]$  where  $k_{\text{self}}$  = second-order rate coefficient of the self reaction of the organic peroxy radical,  $\mathbf{k\_CH302}$  = second-order rate coefficient of the self reaction of  $\text{CH}_3\text{O}_2$ , and  $[\text{RO}_2]$  = sum of the concentrations of all organic peroxy radicals.

## Specific notes

G2110: The rate coefficient is:  $k_{\text{H}_2\text{O}_2} = (3.0\text{E-}13 \cdot \text{EXP}(460./\text{temp}) + 2.1\text{E-}33 \cdot \text{EXP}(920./\text{temp}) \cdot \text{cair}) \cdot (1 + 1.4\text{E-}21 \cdot \text{EXP}(2200./\text{temp}) \cdot \text{C}(\text{ind\_H}_2\text{O}))$ .

G2117: Converted to  $K_c [\text{molec-1 cm}^3] = K_p \cdot R \cdot T / NA$ , where  $R$  is  $82.05736 [\text{cm}^3 \text{atm K}^{-1} \text{mol}^{-1}]$ .

G2118: Assuming fast equilibrium.

G3109: The rate coefficient is:  $k_{\text{NO}_3\text{NO}_2} = k_{3\text{rd}}(\text{temp}, \text{cair}, 2.4\text{E-}30, 3.0, 1.6\text{E-}12, -0.1, 0.6)$ .

G3110: The rate coefficient is defined as backward reaction divided by equilibrium constant.

G3203: The rate coefficient is:  $k_{\text{NO}_2\text{H}_2\text{O}} = k_{3\text{rd}}(\text{temp}, \text{cair}, 1.9\text{E-}31, 3.4, 4.0\text{E-}12, 0.3, 0.6)$ .

G3206: The rate coefficient is:  $k_{\text{HNO}_3\text{OH}} = 1.32\text{E-}14 \cdot \text{EXP}(527/\text{temp}) + 1 / (1 / (7.39\text{E-}32 \cdot \text{EXP}(453/\text{temp}) \cdot \text{cair}) + 1 / (9.73\text{E-}17 \cdot \text{EXP}(1910/\text{temp})))$

G3207: The rate coefficient is defined as backward reaction divided by equilibrium constant.

G3227: Backward reaction divided by equilibrium constant from Burkholder et al. (2015).

G3228: Same as for  $\text{OH} + \text{HNO}_4$ .

G4104b: Methyl nitrate yield according to Banic et al. (2003) but reduced by a factor of 10 according to the upper limit derived from measurements by Munger et al. (1999).

G4109: Same temperature dependence as for  $\text{CH}_3\text{CHO} + \text{NO}_3$  assumed.

G4115: The rate coefficient is defined as backward reaction divided by equilibrium constant.

G4116: Same value as for  $\text{PAN} + \text{OH}$ .

G4126: Same as for G4104 but scaled to match the recommended value at 298K.

G4127: Same as for  $\text{CH}_3\text{O}_2 + \text{NO}_3$  in G4105.

G4130a: SAR for H-abstraction by OH.

G4130b: SAR for H-abstraction by OH.

G4132: SAR for H-abstraction by OH.

G4133: Lower limit of the rate constant. Products uncertain but  $\text{CH}_3\text{OH}$  can be excluded because of a likely high energy barrier (L. Vereecken, pers. comm.).  $\text{CH}_2\text{OO}$  production cannot be excluded.

G4134: Estimate based on the decomposition lifetime of 3 s (Olzmann et al., 1997) and a 20 kcal/mol energy barrier (Vereecken and Francisco, 2012).

G4135: Rate constant for  $\text{CH}_2\text{OO} + \text{NO}_2$  (G4138) multiplied by the factor from Ouyang et al. (2013).

G4136: Average of two measurements.

G4137: Upper limit.

G4138: Average of  $7\text{E-}12$  and  $1.5\text{E-}12$ .

G4141:  $\text{HOOCH}_2\text{OCHO}$  forms and then decomposes to formic anhydride (Gruzdev et al., 1993) which hydrolyses in the humid atmosphere (Conn et al., 1942).

G4142: High-pressure limit.

G4143: Generic estimate for reaction with alcohols.

G4144: Generic estimate for reaction with  $\text{RO}_2$ .

G4148: Same value as for  $\text{NO}_2 + \text{CH}_3\text{O}_2$ .

G4149: Barnes et al. (1985) estimated a decomposition rate equal to that of  $\text{CH}_3\text{O}_2\text{NO}_2$ .

G4150: Value for  $\text{CH}_3\text{O}_2\text{NO}_2 + \text{OH}$ , H-abstraction enhanced by the HO-group by  $f_{\text{SOH}}$ .

G4154: Products assumed to be  $\text{CH}_3\text{O}_2 + \text{O}_2$  (could also be  $\text{HCHO} + \text{O}_2 + \text{OH}$ ).

G4160b: Half of the H-yield is attributed to fast secondary chemistry.

G4160c: The  $\text{NH} + \text{CO}$  channel is also significant but neglected here.

G4161: No studies below 450 K and only the major channel is considered.

G4164: Upper limit. Dominant pathway under atmospheric conditions.

G42001: The product distribution is from Rickard (2022), after substitution of the energized Criegee intermediate,  $\text{CH}_2\text{OO}$ , by its decomposition products and reaction of the stabilized CI with the water dimer.

G42010: Only major channel considered as the end products are essentially the same.

G42013: The rate coefficient is:  $k_{\text{CH}_3\text{CO}_3\text{NO}_2} = k_{3\text{rd}}(\text{temp}, \text{cair}, 9.7\text{E-}29, 5.6, 9.3\text{E-}12, 1.5, 0.6)$ .

G42018: The rate coefficient is the same as for the  $\text{CH}_3$  channel in G4107 ( $\text{CH}_3\text{OOH} + \text{OH}$ ).

G42021: The rate coefficient is  $k_{\text{PAN}_M} = k_{\text{CH}_3\text{CO}_3\text{NO}_2} / 9.0\text{E-}29 \cdot \text{EXP}(-14000./\text{temp})$ , i.e. the rate coefficient is defined as backward reaction divided by equilibrium constant.

G42022a: Quantum yields and products are from Glowacki et al. (2012).

G42022b: Quantum yields and products are from Glowacki et al. (2012).

G42024a: Rate constant is the high-pressure limit as recommended by Atkinson et al. (2006).

G42024b: Rate constant is the high-pressure limit as recommended by Atkinson et al. (2006).

G42047: Orlando et al. (1998) estimated that about 25% of the  $\text{HOCH}_2\text{CH}_2\text{O}$  in this reaction is produced with sufficient excess energy that it decomposes promptly. The decomposition products are 2  $\text{HCHO} + \text{HO}_2$ .

G42051a: Same as for the  $\text{CH}_3\text{O}_2$  channel in G4107:  $\text{CH}_3\text{OOH} + \text{OH}$ .

G42058b: The aldehydic H is assumed to be like the analogous H of  $\text{HOCH}_2\text{CHO}$ .

G42074a: Factor of 3 to match the estimate of  $k = 1.1 \text{E-11 molec/cm}^3/\text{s}$  by Paulot et al. (2009a).

G42074b: Factor of 3 to match the estimate of  $k = 1.1 \text{E-11 molec/cm}^3/\text{s}$  by Paulot et al. (2009a).

G42075:  $\text{NO}_3\text{CH}_2\text{CO}_2\text{H}$  and  $\text{NO}_3\text{CH}_2\text{CO}_3\text{H}$  neglected.

G42078:  $\text{NO}_3\text{CH}_2\text{CO}_2\text{H}$  neglected.

G42082: Same rate constant as for  $\text{PAN} + \text{OH}$ .

G42083a: Rate constant is the high-pressure limit as recommended by Atkinson et al. (2006).

G42083b: Rate constant is the high-pressure limit as recommended by Atkinson et al. (2006).

G42085a: Uncertainties on the kinetics at pressures  $< 0.1 \text{ bar}$ .

G42085b: Channel proposed by Hynes and Wine 1991,  $\text{OH} + \text{HCHO} + \text{HOCN}$ , could not be confirmed by Tyndall et al. (2001b). There is no alternative mechanism at the moment. Products assumed to be  $\text{OH} + \text{CH}_3\text{CO}_3 + \text{NO}$

G42086b: Assuming  $\text{HCN}$  is from channel 2h,  $\text{HCO} + \text{H} + \text{HCN}$ .  $\text{HCO}$  is replaced by  $\text{H} + \text{CO}$ .

G42086c: Assuming exothermic channels 2b and 2d are equally important.

G42087:  $\text{HCOCN}$  is produced but replaced here by its likely oxidation products ( $\text{HCN} + \text{CO}_2$ ) as studied by Tyndall et al. (2001b). The rate constant for a typical  $\text{RO}_2 + \text{NO}$  reaction is used.

G42088:  $\text{NCCH}_2\text{OOH}$  is produced but replaced here by its likely oxidation products ( $\text{HCN} + \text{CO}_2$ ) as studied by Tyndall et al. (2001b). The rate constant for a typical  $\text{RO}_2 + \text{HO}_2$  reaction is used.

G42089a: The minor channel with  $k=5.2\text{E-12}$  is combined with the major one producing  $\text{HCOOH}$ .

G42090: Theoretical keto-enol tautomerization catalyzed by formic acid (Grenfell et al., 2006).

G42091: Theoretical keto-enol tautomerization catalyzed by formic acid (Grenfell et al., 2006).

G42092: approximated  $\text{OH}$  reaction for oxalic acid

G42093a: SAR for H-abstraction by  $\text{OH}$

G42093b: SAR for H-abstraction by  $\text{OH}$ , assuming that  $-\text{CHOHOH}$  has an effect like  $-\text{CH}_2\text{OH}$

G42093c: SAR for H-abstraction by  $\text{OH}$

G42093d: SAR for H-abstraction by  $\text{OH}$

G42094a: SAR for H-abstraction by  $\text{OH}$

G42094b: SAR for H-abstraction by  $\text{OH}$

G42095a: SAR for H-abstraction by  $\text{OH}$

G42095b: SAR for H-abstraction by  $\text{OH}$

G42096a: SAR for H-abstraction by  $\text{OH}$

G42096b: SAR for H-abstraction by  $\text{OH}$

G42097a: SAR for H-abstraction by  $\text{OH}$

G42097b: SAR for H-abstraction by  $\text{OH}$

G42098a: SAR for H-abstraction by  $\text{OH}$ , assuming that  $-\text{CH}_2\text{OOH}$  has the same effect as  $-\text{CH}_2\text{OH}$

G42098b: SAR for H-abstraction by  $\text{OH}$

G42098c: SAR for H-abstraction by  $\text{OH}$

G43001a: Branching ratios according to Rickard et al. (1999).

G43001b: Branching ratios according to Rickard et al. (1999).

G43004: The value for the generic  $\text{RO}_2 + \text{HO}_2$  reaction from Atkinson (1997) is used here.

G43008: The value for the generic  $\text{RO}_2 + \text{HO}_2$  reaction from Atkinson (1997) is used here.

G43011: Strong positive deviation of  $k$  below 240 K compared to the expression recommended by JPL (Burkholder et al., 2015).

G43015a: The same value as for G4107 ( $\text{CH}_3\text{OOH} + \text{OH}$ ) is used, multiplied by the branching ratio of the  $\text{CH}_3\text{O}_2$  channel.

G43028: Alkyl nitrate formation neglected. (also not considered in MCM).

G43037: Alkyl nitrate formation neglected. (also not considered in MCM).

G43040a: Rate coefficient estimated with SAR (Taraborrelli, 2010).

G43040b: Rate coefficient estimated with SAR (Taraborrelli, 2010).

G43044: Alkyl nitrate formation neglected.

G43045c: Rate coefficient assumed to equal to the one of hydroxyacetone ( $\text{ACETOL}$ ) for this channel.

G43048: Using the high-pressure limit.

G43049: The pressure fall-off between 1000 and 100 mbar is only 3% (Kirchner et al., 1999).

G43050: Value for  $\text{CH}_3\text{O}_2\text{NO}_2 + \text{OH}$ , H-abstraction enhanced by the  $\text{CH}_3\text{CO}$ -group by  $f_{\text{CO}}$ .

G43051c: Products approximated with  $\text{C}_2\text{H}_5\text{CHO} + \text{HO}_2$ .

G43052: Only major H-abstraction channel considered.

G43059: Products approximated with the major end-product  $\text{CH}_3\text{CHO}$ .

G43060b: Products approximated with the major end-product  $\text{CH}_3\text{CHO}$ .

G43061: Products approximated with the likely end-product  $\text{CH}_3\text{CHO}$ .

G43065: As for  $\text{HCOCO}_3$ .

G43070a: Branching ratios estimated with SAR for H-abstraction rate constants by  $\text{OH}$ .

G43070b: Branching ratios estimated with SAR for H-abstraction rate constants by OH.

G43071a: Only this channel considered as the intermediate radical is likely more stable than  $\text{CHCH}(\text{OH})_2$ .

G43072: Theoretical keto-enol tautomerization catalyzed by formic acid (Grenfell et al., 2006).

G43073: Theoretical keto-enol tautomerization catalyzed by formic acid (Grenfell et al., 2006).

G43074:  $\text{HCOCOCHO}$  would be produced but undergoes fast photolysis (faster than  $\text{MGLYOX}$ ) and is substituted with its products.

G43075a: Same value as for methanediol.

G43075b: Same value as for methanediol.

G43223: Products simplified

G43419:  $\text{KDEC C3DIALO} \rightarrow \text{GLYOX} + \text{CO} + \text{HO2}$

G43420:  $\text{KDEC C3DIALO} \rightarrow \text{GLYOX} + \text{CO} + \text{HO2}$

G43421: Permutation reaction (minor channels removed).

G44000: The  $\text{LC}_4\text{H}_9\text{O}_2$  composition ( $\text{nC}_4\text{H}_9\text{O}_2:\text{sC}_4\text{H}_9\text{O}_2$  ratio) is assumed to be equal to the ratio of the production rates at 298K:  $k_p/(k_p+k_s) = 0.1273$  and  $k_s/(k_p+k_s) = 0.8727$ .

G44001b:  $\text{sC}_4\text{H}_9\text{O}_2$  products are substituted with 0.636  $\text{MEK} + \text{HO}_2$  and 0.364  $\text{CH}_3\text{CHO} + \text{C}_2\text{H}_5\text{O}_2$  at 1 bar and 298 K.

G44003c: The alkyl nitrate yield is the weighted average yield for the two isomers forming from  $\text{nC}_4\text{H}_9\text{O}_2$  and  $\text{sC}_4\text{H}_9\text{O}_2$ .

G44010b: H-abstraction from primary C and substitution of the resulting peroxy radical with its products from the reaction with NO.

G44011: H-abstraction from primary C and substitution of the resulting peroxy radical with its products from the reaction with NO.

G44015b: Products assumed to be only from H-abstraction from a secondary C bearing the  $-\text{OOH}$  group.

G44016: Products assumed to be only from H-abstraction from a secondary C bearing the  $-\text{ONO}_2$  group.

G44018:  $\text{LHMVKABO2}$  is  $0.12 \text{ HMVKA02} + 0.88 \text{ HMVKBO2}$ .

G44019:  $\text{LMEKO2}$  represents  $0.62 \text{ MEKBO2} + 0.38 \text{ MEKAO2}$ .

G44021a: The products of  $\text{MEKAO}$  are substituted with  $\text{HCHO} + \text{CO}_2 + \text{HOCH}_2\text{CH}_2\text{O}_2$ .

G44023a: Products from H-abstraction from the tertiary carbon bearing the  $\text{ONO}_2$  group.

G44023b: Products from H-abstraction from the secondary carbon bearing the  $\text{ONO}_2$  group.

G44025: Same value as for PAN.

G44026: Products as in G4415. Only the main channels for each isomer are considered. Weighted average for the isomers.

G44035: Rate constant replaced with the one of beta hydroxy  $\text{RO}_2$ .

G44046b: Using value for secondary nitrate (88% of total).

G44061a: Using value for secondary nitrate (88% of total).

G44061b: Using value for secondary nitrate (88% of total).

G44062a: Simplified products.

G44062b: Simplified products.

G44066: Alkyl nitrate formation neglected.

G44070: Alkyl nitrate formation neglected.

G44076: Alkyl nitrate formation neglected.

G44078: Other channel neglected.

G44081: Alkyl nitrate formation neglected.

G44082: Other channel neglected.

G44085:  $k$  for  $\text{CH}_3\text{CHCO}$  from Hatakeyama et al. (1985) adjusted.

G44086: Simplified product distribution.

G44089: The nitrated  $\text{RO}_2$  is replaced by its products upon reaction with NO.

G44096: Both  $\text{LBUT1ENO2}$  isomers mostly  $\text{C}_2\text{H}_5\text{CHO}$ .

G44097a: Branching ratios according to Rickard et al. (1999).  $\text{CH}_3\text{CHO}_2\text{CHO}$  is replaced with its major products  $\text{CH}_3\text{CHO} + \text{CO} + \text{HO}_2$ .

G44097b: Branching ratios according to Rickard et al. (1999).

G44098: The nitrated  $\text{RO}_2$  is replaced by its products upon reaction with NO.

G44103b:  $\text{MEKCOH}$  replaced by its major oxidation products.

G44104: Carbonyl nitrate replaced by its major oxidation products.

G44106:  $\text{CH}_3\text{CHOOA}$  products as from  $\text{C}_3\text{H}_6 + \text{O}_3$  reaction.

G44107: The nitrated  $\text{RO}_2$  is replaced by its products upon reaction with NO.

G44110: The nitrated  $\text{RO}_2$  is replaced by its products upon reaction with NO.

G44124b: Skipping intermediate steps mostly leading to acetone.

G44126: Skipping intermediate steps mostly leading to acetone.

G44127: Only this channel considered as the intermediate radical is likely more stable than  $\text{CHCH}(\text{OH})_2$ .

G44128: Theoretical keto-enol tautomerization catalyzed by formic acid (Grenfell et al., 2006).

G44129: Theoretical keto-enol tautomerization catalyzed by formic acid (Grenfell et al., 2006).

G44130: Only this channel considered as the intermediate radical is likely more stable than CHCH(OH)<sub>2</sub>.

G44131: Theoretical keto-enol tautomerization catalyzed by formic acid (Grenfell et al., 2006).

G44132: Theoretical keto-enol tautomerization catalyzed by formic acid (Grenfell et al., 2006).

G44133: Only this channel considered as the intermediate radical is likely more stable than CHCH(OH)<sub>2</sub>.

G44134: Theoretical keto-enol tautomerization catalyzed by formic acid (Grenfell et al., 2006).

G44135: Theoretical keto-enol tautomerization catalyzed by formic acid (Grenfell et al., 2006).

G44136: Only this channel considered as the intermediate radical is likely more stable than CHCH(OH)<sub>2</sub>.

G44137: Theoretical keto-enol tautomerization catalyzed by formic acid (Grenfell et al., 2006).

G44138: Theoretical keto-enol tautomerization catalyzed by formic acid (Grenfell et al., 2006).

G44139: Simplified oxidation.

G44140: Simplified oxidation.

G44141: Simplified oxidation.

G44142: Simplified oxidation.

G44202: Alkyl nitrate formation neglected.

G44203a: Rate coefficient estimated with SAR (Taraborrelli, 2010).

G44205: Alkyl nitrate formation neglected.

G44210: Alkyl nitrate formation neglected.

G44221: Same k as for MGLYOX + OH (Tyndall et al., 1995).

G44402: KDEC NC4DCO<sub>2</sub> → MALANHY + NO<sub>2</sub>

G44406c: KDEC MALDIALCO<sub>2</sub> → 0.6 MALANHY + HO<sub>2</sub> + 0.4 GLYOX + 0.4 CO + 0.4 CO<sub>2</sub>

G44407: KDEC MALDIALCO<sub>2</sub> → 0.6 MALANHY + HO<sub>2</sub> + 0.4 GLYOX + 0.4 CO + 0.4 CO<sub>2</sub>

G44409: KDEC MALDIALCO<sub>2</sub> → 0.6 MALANHY + HO<sub>2</sub> + 0.4 GLYOX + 0.4 CO + 0.4 CO<sub>2</sub>

G44410: KDEC MALDIALCO<sub>2</sub> → 0.6 MALANHY + HO<sub>2</sub> + 0.4 GLYOX + 0.4 CO + 0.4 CO<sub>2</sub>

G44412: KDEC BZFUONOOA → 0.5 BZFUONOO + 0.5 CO + 0.5 CO<sub>2</sub> + 0.5 HCOCH<sub>2</sub>O<sub>2</sub> + 0.5 OH and BZFUONOO → 0.625 CO<sub>14</sub>O<sub>3</sub>CO<sub>2</sub>H + 0.375 CO<sub>14</sub>O<sub>3</sub>CHO + 0.375 H<sub>2</sub>O<sub>2</sub>

G44421: Only major channel.

G44424: KDEC: GLYOOA → 0.125 HCHO + 0.18 GLYOO + 0.82 HO<sub>2</sub> + 0.57 OH + 1.265 CO + 0.25 CO<sub>2</sub> and H<sub>2</sub>O substitution GLYOO → 0.625 HCOCO<sub>2</sub>H + 0.375 GLYOX + 0.375 H<sub>2</sub>O<sub>2</sub>

G44425: Merged equations.

G44430: KDEC MALANHYO → HCOCO<sub>2</sub>HCO<sub>3</sub>

G44431: KDEC MALANHYO → HCOCO<sub>2</sub>HCO<sub>3</sub>

G44432: Only major channel. KDEC MALANHYO → HCOCO<sub>2</sub>HCO<sub>3</sub>

G44436: KDEC NBZFUO → 0.5 CO<sub>14</sub>O<sub>3</sub>CHO + 0.5 NO<sub>2</sub> + 0.5 NBZFUONE + 0.5 HO<sub>2</sub>

G44437: KDEC NBZFUO → 0.5 CO<sub>14</sub>O<sub>3</sub>CHO + 0.5 NO<sub>2</sub> + 0.5 NBZFUONE + 0.5 HO<sub>2</sub>

G44438: KDEC NBZFUO → 0.5 CO<sub>14</sub>O<sub>3</sub>CHO + 0.5 NO<sub>2</sub> + 0.5 NBZFUONE + 0.5 HO<sub>2</sub> and RO<sub>2</sub> Only major channel.

G44439: KDEC MALDIALCO<sub>2</sub> → 0.6 MALANHY + HO<sub>2</sub> + 0.4 GLYOX + 0.4 CO + 0.4 CO<sub>2</sub>

G44443: KDEC MECOACETO → CH<sub>3</sub>CO<sub>3</sub> + HCHO

G44444: KDEC MECOACETO → CH<sub>3</sub>CO<sub>3</sub> + HCHO

G44445: KDEC MECOACETO → CH<sub>3</sub>CO<sub>3</sub> + HCHO

G44450: KDEC BZFUO → CO<sub>14</sub>O<sub>3</sub>CHO + HO<sub>2</sub>

G44451: KDEC BZFUO → CO<sub>14</sub>O<sub>3</sub>CHO + HO<sub>2</sub>

G44452: KDEC BZFUO → CO<sub>14</sub>O<sub>3</sub>CHO + HO<sub>2</sub>. Only major channel.

G44457: KDEC MALDIALO → GLYOX + GLYOX + HO<sub>2</sub>

G44458: KDEC MALDIALO → GLYOX + GLYOX + HO<sub>2</sub>

G44459: KDEC MALDIALO → GLYOX + GLYOX + HO<sub>2</sub>. Only major channel.

G44461: KBPAN → k.PAN\_M

G45019d: Delta-1 and delta-2 LIEPOX are not considered and replaced by beta-LIEPOX formed by ISOP-BOOH and ISOPDOOH.

G45021: SAR estimate within uncertainty range of the experimentally determined rate constant by Solberg et al. (1997), 1.1E-11.

G45037: SAR estimate within uncertainty range of the experimentally determined rate constant by Solberg et al. (1997), 4.2E-11.

G45040: Alkyl nitrate formation neglected.

G45043: Old MCM rate constant 4.16E-11.

G45047: Alkyl nitrate formation neglected.

G45055: Alkyl nitrate formation neglected.

G45071: Alkyl nitrate formation neglected.

G45074: Formic acid production consistent with results of Bates et al. (2014). Here, the high yields of formic

acid and hydroxycarbonyls at low NO from oxidation of cis-beta-LIEPOX (the most abundant isomer) are approximated with the production of DB1O which undergo both the Dibble double H-transfer to DB2O2 and HOCH2 elimination yielding HVMK and HMAK (keto-vinyl alcohol potentially arising from decomposition of the alkoxy radical resulting from the ring opening after H-abstraction). The rate constant is from Paulot et al. (2009b) and adjusted based on Bates et al. (2014) that determined the single rate constants for the cis- and trans- beta isomer.

G45080: Alkyl nitrate formation neglected.

G45092a: C4MDIAL = CM4DIAL in MCM only from aromatics.

G45092b: Only one acyl peroxy radical considered.

G45093: Two aldehydic sites reacting with NO<sub>3</sub> but only one isomer product considered.

G45095: Alkyl nitrate formation neglected.

G45098: Alkyl nitrate formation neglected.

G45100: Alkyl nitrate formation neglected.

G45104a: DB1OOH is a hydroperoxide bearing a vinyl alcohol moiety that upon reaction with OH yields HCOOH (Davis et al., 1998).

G45107: OH production here is to take into account the hydroperoxidic function formed by the shift of the enolic hydrogen and not present in DB2O2. This approximation leads to spurious HO<sub>2</sub> production.

G45108a: Consistent with the results of Bates et al. (2014).

G45108b: Consistent with the results of Bates et al. (2014). Assuming that the enol alkoxy radical partly decomposes yielding a substitute vinyl alcohol.

G45111: Alkyl nitrate formation neglected.

G45114b: Here, formic acid is mechanistically produced by the OH-addition to the vinyl alcohol which, upon RO<sub>2</sub>-to-RO conversion (skipped here), yields the HOCHOH fragment which in turn reacts with O<sub>2</sub> forming HCOOH + HO<sub>2</sub>. Along CH<sub>3</sub>COCHOHCHO should be produced but not in the mechanism. Only CH<sub>3</sub>COCHO<sub>2</sub>CHO. The rate constant is consistent with predictions by Ganzeveld et al. (2006) for ENOL. OH-addition to the OH-bearing carbon is considered the dominant channel as it is already for the ENOL (Ganzeveld et al., 2006).

G45115: Theoretical keto-enol tautomerization catalyzed by formic acid (Grenfell et al., 2006). The product should be C1ODC3OOHC4OD but it is neglected in the mechanism.

G45116: As for DB1OOH + OH.

G45117: Additional sinks for DB2OOH are neglected.

G45121b: Nitrate assumed to be major isomer that is mostly similar to products of ISOPDO<sub>2</sub>-chemistry.

G45128: Rate constant by Liljegren and Stevens (2013). A lumped RO<sub>2</sub> that upon conversion to RO yields 100% 2-methyl-butenedial (C4MDIAL) although Aschmann et al. (2014) quantified a 38% yield of the Z/E mixture.

G45129: As for 3METHYLFURAN + OH but with additional NO<sub>2</sub> production for mass conservation.

G45131: Alkyl nitrate formation neglected.

G45132: Hydroperoxide formation neglected.

G45134b: ZCO<sub>2</sub>HC<sub>2</sub>3DBCOD formation is neglected. However, it is produced in MCM and in aromatic-related reactions under the name of MC3ODBCO<sub>2</sub>H.

G45139: LZCPANC<sub>2</sub>3DBCOD is assumed to react like LC5PAN1719.

G45201: Alkyl nitrate formation neglected.

G45207: Alkyl nitrate formation neglected.

G45214: Alkyl nitrate formation neglected.

G45217: Alkyl nitrate formation neglected.

G45225: Alkyl nitrate formation neglected.

G45236: LMBOABO<sub>2</sub> = 0.67 MBOAO<sub>2</sub> + 0.33 MBOBO<sub>2</sub>

G45247: Alkyl nitrate formation neglected.

G45400: KDEC NC4MDCO<sub>2</sub> → MMALANHY + NO<sub>2</sub>

G45404: KDEC NTLFUO → ACCOMECHO + NO<sub>2</sub>

G45405: KDEC NTLFUO → ACCOMECHO + NO<sub>2</sub>

G45406: KDEC NTLFUO → ACCOMECHO

G45409: KBPAN → k\_PAN\_M(renaming)

G45413: KFPAN → k.CH<sub>3</sub>CO<sub>3</sub>\_NO<sub>2</sub> (renaming)

G45422: KDEC MMALANHYO→CO<sub>2</sub>H<sub>3</sub>CO<sub>3</sub>

G45423: KDEC MMALANHYO→CO<sub>2</sub>H<sub>3</sub>CO<sub>3</sub>

G45424: KDEC MMALANHYO→CO<sub>2</sub>H<sub>3</sub>CO<sub>3</sub> and Only major channel.

G45429: KBPAN → k\_PAN\_M (renamed)

G45430a: KDEC C<sub>5</sub>CO<sub>14</sub>CO<sub>2</sub> → 0.83 MALANHY + 0.83 CH<sub>3</sub> + 0.17 MGLYOX + 0.17 HO<sub>2</sub> + 0.17 CO + 0.17 CO<sub>2</sub>

G45431: KDEC C<sub>5</sub>CO<sub>14</sub>CO<sub>2</sub> → 0.83 MALANHY + 0.83 CH<sub>3</sub> + 0.17 MGLYOX + 0.17 HO<sub>2</sub> + 0.17 CO + 0.17 CO<sub>2</sub>

G45432: KFPAN →k.CH<sub>3</sub>CO<sub>3</sub>\_NO<sub>2</sub> (renaming)

G45433: KDEC C<sub>5</sub>CO<sub>14</sub>CO<sub>2</sub> → 0.83 MALANHY + 0.83 CH<sub>3</sub> + 0.17 MGLYOX + 0.17 HO<sub>2</sub> + 0.17 CO + 0.17 CO<sub>2</sub>

G45434: KDEC C<sub>5</sub>CO<sub>14</sub>CO<sub>2</sub> → 0.83 MALANHY + 0.83 CH<sub>3</sub> + 0.17 MGLYOX + 0.17 HO<sub>2</sub> + 0.17 CO + 0.17 CO<sub>2</sub> and only major channel.

G45436: KDEC C<sub>5</sub>CO<sub>14</sub>CO<sub>2</sub> → 0.83 MALANHY + 0.83 CH<sub>3</sub> + 0.17 MGLYOX + 0.17 HO<sub>2</sub> + 0.17 CO + 0.17 CO<sub>2</sub>

G45444: KDEC MC3CODBCO2  $\rightarrow$  0.35 GLYOX + 0.35 CH3 + 0.35 CO + 0.35 CO2 + 0.65 MMALANHY + 0.65 HO2

G45452: KDEC TLFUONOOA  $\rightarrow$  0.5 CO + 0.5 OH + 0.5 MECOACETO2 + 0.5 TLFUONOO and H2O subs TLFUONOO  $\rightarrow$  0.625 C24O3CCO2H + 0.375 ACCOMECHO + 0.375 H2O2

G45456: KFPAN  $\rightarrow$  k\_CH3CO3\_NO2 (renaming)

G45476b: KDEC NTLFUO  $\rightarrow$  ACCOMECHO + NO2 and reactions with KRO2HO2.

G45477: KDEC NTLFUO  $\rightarrow$  ACCOMECHO + NO2

G45478: KDEC NTLFUO  $\rightarrow$  ACCOMECHO + NO2

G45479: KDEC NTLFUO  $\rightarrow$  ACCOMECHO + NO2

G45486b: KDEC C5DIALO  $\rightarrow$  MALDIAL + CO + HO2 and reactions with KRO2HO2.

G45487: KDEC C5DIALO  $\rightarrow$  MALDIAL

G45488: KDEC C5DIALO  $\rightarrow$  MALDIAL

G45489: KDEC C5DIALO  $\rightarrow$  MALDIAL

G45491b: Reactions with KRO2HO2.

G45492: MGLYOX + GLYOX + HO2 from KDEC substitution

G45493: MGLYOX + GLYOX + HO2 from KDEC substitution

G45494: Permutation reaction (minor channels removed).

G46201: Alkyl nitrate formation neglected.

G46404b: Reactions with KRO2HO2 and KDEC C615CO2O  $\rightarrow$  C5DICARB + CO + HO2.

G46405: KDEC C615CO2O  $\rightarrow$  C5DICARB + CO + HO2

G46406: KDEC C615CO2O  $\rightarrow$  C5DICARB + CO + HO2

G46407: Only major channel.

G46413b: Reactions with KRO2HO2 and KDEC NDNPHENO  $\rightarrow$  NC4DCO2H + HNO3 + CO + CO + NO2.

G46414: KDEC NDNPHENO  $\rightarrow$  NC4DCO2H + HNO3 + CO + CO + NO2

G46415: KDEC NDNPHENO  $\rightarrow$  NC4DCO2H + HNO3 + CO + CO + NO2

G46416: KDEC NDNPHENO  $\rightarrow$  NC4DCO2H + HNO3 + CO + CO + NO2

G46418: KDEC CATECOOA  $\rightarrow$  MALDALCO2H + HCOCO2H + HO2 + OH

G46426: KFPAN  $\rightarrow$  k\_CH3CO3\_NO2

G46430: KDEC GLYOOA  $\rightarrow$  .125 HCHO + .18 GLYOO + .82 HO2 + .57 OH + 1.265 CO

G46432b: Reactions with KRO2HO2 and KDEC NCATECO  $\rightarrow$  NC4DCO2H + HCOCO2H + HO2

G46433: KDEC NCATECO  $\rightarrow$  NC4DCO2H + HCOCO2H + HO2

G46434: KDEC NCATECO  $\rightarrow$  NC4DCO2H + HCOCO2H + HO2

G46435: KDEC NCATECO  $\rightarrow$  NC4DCO2H + HCOCO2H + HO2

G46437b: Reactions with KRO2HO2 and KDEC NPHENO  $\rightarrow$  MALDALCO2H + GLYOX + NO2

G46438: KDEC NPHENO  $\rightarrow$  MALDALCO2H + GLYOX + NO2

G46439: KDEC NPHENO  $\rightarrow$  MALDALCO2H + GLYOX + NO2

G46440: KDEC NPHENO  $\rightarrow$  MALDALCO2H + GLYOX + NO2

G46441: Merged equations.

G46447b: reactions with KRO2HO2 and KDEC NNCATECO  $\rightarrow$  NC4DCO2H + HCOCO2H + NO2

G46448: KDEC NNCATECO  $\rightarrow$  NC4DCO2H + HCOCO2H + NO2

G46449: KDEC NNCATECO  $\rightarrow$  NC4DCO2H + HCOCO2H + NO2

G46450: KDEC NNCATECO  $\rightarrow$  NC4DCO2H + HCOCO2H + NO2

G46457: Merged equations.

G46458: Merged equations.

G46461b: Reactions with KRO2HO2 and KDEC PHENO  $\rightarrow$  0.71 MALDALCO2H + 0.71 GLYOX + 0.29 PBZQONE + HO2

G46462: KDEC PHENO  $\rightarrow$  0.71 MALDALCO2H + 0.71 GLYOX + 0.29 PBZQONE + HO2

G46463: KDEC PHENO  $\rightarrow$  0.71 MALDALCO2H + 0.71 GLYOX + 0.29 PBZQONE + HO2

G46464: KDEC PHENO  $\rightarrow$  0.71 MALDALCO2H + 0.71 GLYOX + 0.29 PBZQONE + HO2 and Only major channel.

G46468: KFPAN  $\rightarrow$  k\_CH3CO3\_NO2

G46472b: new channel

G46476: HOC6H4NO2 is a nitro-phenol

G46480b: Reactions with KRO2HO2 and KDEC PBZQO  $\rightarrow$  C5CO2OHCO3

G46481: KDEC PBZQO  $\rightarrow$  C5CO2OHCO3

G46482: KDEC PBZQO  $\rightarrow$  C5CO2OHCO3

G46483: KDEC PBZQO  $\rightarrow$  C5CO2OHCO3 and Only major channel.

G46485b: Reactions with KRO2HO2 and KDEC DNPHEO  $\rightarrow$  NC4DCO2H + HCOCO2H + NO2

G46486: KDEC DNPHENO  $\rightarrow$  NC4DCO2H + HCOCO2H + NO2

G46487: KDEC DNPHENO  $\rightarrow$  NC4DCO2H + HCOCO2H + NO2

G46488: KDEC DNPHENO  $\rightarrow$  NC4DCO2H + HCOCO2H + NO2

G46490b: Reactions with KRO2HO2 and KDEC BZEMUCO  $\rightarrow$  0.5 EPXC4DIAL + 0.5 GLYOX + 0.5 HO2 + 0.5 C3DIALO2 + 0.5 C32OH13CO.

G46491b: KDEC BZEMUCO  $\rightarrow$  0.5 EPXC4DIAL + 0.5 GLYOX + 0.5 HO2 + 0.5 C3DIALO2 + 0.5 C32OH13CO.

G46492: KDEC BZEMUCO  $\rightarrow$  0.5 EPXC4DIAL + 0.5 GLYOX + 0.5 HO2 + 0.5 C3DIALO2 + 0.5 C32OH13CO

G46493: KDEC BZEMUCO  $\rightarrow$  0.5 EPXC4DIAL + 0.5 GLYOX + 0.5 HO2 + 0.5 C3DIALO2 + 0.5 C32OH13CO and Only major channel.

G46499b: Reactions with KRO2HO2 and KDEC NBZQO  $\rightarrow$  C6CO4DB + NO2.

G46500: KDEC NBZQO  $\rightarrow$  C6CO4DB + NO2

G46501: KDEC NBZQO  $\rightarrow$  C6CO4DB + NO2

G46502: KDEC NBZQO  $\rightarrow$  C6CO4DB + NO2

G46505b: New channel.

G46515: Only major channel.

G46522b: In analogy to TLBIPERO2 from toluene (Birdsall et al., 2010).

G46523b: KDEC BZBIPERO  $\rightarrow$  GLYOX + HO2 + 0.5 BZFUONE + 0.5 BZFUONE

G46524: KDEC BZBIPERO  $\rightarrow$  GLYOX + HO2 + 0.5 BZFUONE + 0.5 BZFUONE

G46525: KDEC BZBIPERO  $\rightarrow$  GLYOX + HO2 + 0.5 BZFUONE + 0.5 BZFUONE and Only major channel.

G47210: Alkyl nitrate formation neglected.

G47214: Alkyl nitrate formation neglected.

G47218: Alkyl nitrate formation neglected.

G47222: Alkyl nitrate formation neglected.

G47223: ROO6R3OOH produced but no sink for it.

G47225: ROO6R4P produced but no sink for it.

G47226: ROO6R5P produced but no sink for it

G47400: Merged.

G47402a: KROPRIM\*O2 fast reaction C6H5CH2O = BENZAL + HO2.

G47402b: KROPRIM\*O2 fast reaction C6H5CH2O = BENZAL + HO2.

G47403: KROPRIM\*O2 fast reaction C6H5CH2O = BENZAL + HO2.

G47404: KROPRIM\*O2 fast reaction C6H5CH2O = BENZAL + HO2. C6H5CH2OH replaced by its oxidation product BENZAL.

G47405: Merged.

G47406: Merged.

G47407b: According to Birdsall et al. (2010), the branching ratio rbipero2\_oh is set to 0.4 in order to take into account the OH-recycling and summed yield of butendial and methylbutendial.

G47408a: KDEC TLBIPERO  $\rightarrow$  0.6 GLYOX + 0.4 MGLYOX + HO2 + 0.2 C4MDIAL + 0.2 C5DICARB + 0.2 TLFUONE + 0.2 BZFUONE + 0.2 MALDIAL

G47408b: KDEC TLBIPERO  $\rightarrow$  0.6 GLYOX + 0.4 MGLYOX + HO2 + 0.2 ZCODC23DB COD + 0.2 C5DICARB + 0.2 TLFUONE + 0.2 BZFUONE + 0.2 MALDIAL

G47409: KDEC TLBIPERO  $\rightarrow$  0.6 GLYOX + 0.4 MGLYOX + HO2 + 0.2 ZCODC23DB COD + 0.2 C5DICARB + 0.2 TLFUONE + 0.2 BZFUONE + 0.2 MALDIAL

G47410: Only major channel and KDEC TLBIPERO  $\rightarrow$  0.6 GLYOX + 0.4 MGLYOX + HO2 + 0.2 ZCODC23DB COD + 0.2 C5DICARB + 0.2 TLFUONE + 0.2 BZFUONE + 0.2 MALDIAL

G47412: KDEC MGLOOB  $\rightarrow$  0.125 CH3CHO + 0.695 CH3CO + 0.57 CO + 0.57 OH + 0.125 HO2 + 0.18 MGLOO + 0.25 CO2

G47413: Merged.

G47418b: Reactions with KRO2HO2 and KDEC CRESO  $\rightarrow$  0.68 C5CO14OH + 0.68 GLYOX + HO2 + 0.32 PTLQONE.

G47419: KDEC CRESO  $\rightarrow$  0.68 C5CO14OH + 0.68 GLYOX + HO2 + 0.32 PTLQONE

G47420: KDEC CRESO  $\rightarrow$  0.68 C5CO14OH + 0.68 GLYOX + HO2 + 0.32 PTLQONE

G47421: KDEC CRESO  $\rightarrow$  0.68 C5CO14OH + 0.68 GLYOX + HO2 + 0.32 PTLQONE and Only major channel.

G47422b: Reactions with KRO2HO2 and KDEC NCRESO  $\rightarrow$  C5CO14OH + GLYOX + NO2

G47423: KDEC NCRESO  $\rightarrow$  C5CO14OH + GLYOX + NO2

G47424: KDEC NCRESO  $\rightarrow$  C5CO14OH + GLYOX + NO2

G47425: KDEC NCRESO  $\rightarrow$  C5CO14OH + GLYOX + NO2 and Only major channel.

G47426: TOL1OHNO2 is a nitro-phenol

G47429: KDEC MCATECOOA  $\rightarrow$  MC3ODBCO2H + HCOCO2H + HO2 + OH

G47436: KFPAN  $\rightarrow$  k\_CH3CO3\_NO2

G47438: Only major channel.



G47439b: Reactions with KRO2HO2 and KDEC TLEMUCO  $\rightarrow$  0.5 C3DIALO2 + 0.5 CO2H3CHO + 0.5 EPXC4DIAL + 0.5 MGLYOX + 0.5 HO2

G47440b: KDEC TLEMUCO  $\rightarrow$  0.5 C3DIALO2 + 0.5 CO2H3CHO + 0.5 EPXC4DIAL + 0.5 MGLYOX + 0.5 HO2

G47441: KDEC TLEMUCO  $\rightarrow$  0.5 C3DIALO2 + 0.5 CO2H3CHO + 0.5 EPXC4DIAL + 0.5 MGLYOX + 0.5 HO2

G47442: KDEC TLEMUCO  $\rightarrow$  0.5 C3DIALO2 + 0.5 CO2H3CHO + 0.5 EPXC4DIAL + 0.5 MGLYOX + 0.5 HO2 and Only major channel.

G47445: KFPAN  $\rightarrow$  k\_CH3CO3\_NO2

G47447: Only major channel.

G47454: New channel.

G47479: New channel.

G47482b: Reactions with KRO2HO2 and KDEC NPTLQO  $\rightarrow$  C7CO4DB + NO2

G47483: KDEC NPTLQO  $\rightarrow$  C7CO4DB + NO2

G47484: KDEC NPTLQO  $\rightarrow$  C7CO4DB + NO2

G47485: KDEC NPTLQO  $\rightarrow$  C7CO4DB + NO2

G47486b: Reactions with KRO2HO2 and KDEC PTLQO  $\rightarrow$  C6CO2OHCO3

G47487: KDEC PTLQO  $\rightarrow$  C6CO2OHCO3

G47488: KDEC PTLQO  $\rightarrow$  C6CO2OHCO3

G47489: Only major channel. KDEC PTLQO  $\rightarrow$  C6CO2OHCO3.

G47494: New channel.

G47497b: Reactions with KRO2HO2 and KDEC MNCATECO  $\rightarrow$  NC4MDCO2H + HCOCO2H + NO2

G47498: KDEC MNCATECO  $\rightarrow$  NC4MDCO2H + HCOCO2H + NO2

G47499: KDEC MNCATECO  $\rightarrow$  NC4MDCO2H + HCOCO2H + NO2

G47501b: Reactions with KRO2HO2 and KDEC MNCATECO  $\rightarrow$  NC4MDCO2H + HCOCO2H + HO2

G47502: KDEC MNCATECO  $\rightarrow$  NC4MDCO2H + HCOCO2H + HO2

G47503: KDEC MNCATECO  $\rightarrow$  NC4MDCO2H + HCOCO2H + HO2

G47504: KDEC MNCATECO  $\rightarrow$  NC4MDCO2H + HCOCO2H + HO2

G47509b: Reactions with KRO2HO2 and KDEC DNCRESO  $\rightarrow$  NC4MDCO2H + HNO3 + CO + CO + NO2

G47510: KDEC DNCRESO  $\rightarrow$  NC4MDCO2H + HNO3 + CO + CO + NO2

G47511: KDEC DNCRESO  $\rightarrow$  NC4MDCO2H + HNO3 + CO + CO + NO2

G47512: KDEC DNCRESO  $\rightarrow$  NC4MDCO2H + HNO3 + CO + CO + NO2

G47513b: Reactions with KRO2HO2 and KDEC DNCRESO  $\rightarrow$  NC4MDCO2H + HCOCO2H + NO2

G47514: KDEC DNCRESO  $\rightarrow$  NC4MDCO2H + HCOCO2H + NO2

G47515: KDEC DNCRESO  $\rightarrow$  NC4MDCO2H + HCOCO2H + NO2

G47516: KDEC DNCRESO  $\rightarrow$  NC4MDCO2H + HCOCO2H + NO2

G48202: Alkyl nitrate formation neglected.

G48205: Alkyl nitrate formation neglected.

G48210: Alkyl nitrate formation neglected.

G48212: Alkyl nitrate formation neglected.

G48216: Alkyl nitrate formation neglected.

G48222: Alkyl nitrate formation neglected.

G48400a: Same products as for toluene. Assuming a 1:1:1 proportion in xylenes emissions the analogous toluene product is produced with a rate constant equal to  $(1.36\text{E-}11 \cdot 0.24 + 2.31\text{E-}11 \cdot 0.29 + 1.43\text{E-}11 \cdot 0.155)/3$ , where k and coefficients are for the single isomers ortho, meta and para from MCM.

G48400b: Same products as for toluene. Assuming a 1:1:1 proportion in xylenes emissions the analogous toluene product is produced with a rate constant equal to  $(1.36\text{E-}11 \cdot 0.05 + 2.31\text{E-}11 \cdot 0.04 + 1.43\text{E-}11 \cdot 0.10)/3$ , where k and coefficients are for the single isomers ortho, meta and para from MCM.

G48400c: Same products as for toluene. Assuming a 1:1:1 proportion in xylenes emissions the analogous toluene product is produced with a rate constant equal to  $(1.36\text{E-}11 \cdot 0.16 + 2.31\text{E-}11 \cdot 0.17 + 1.43\text{E-}11 \cdot 0.12)/3$ , where k and coefficients are for the single isomers ortho, meta and para from MCM.

G48400d: Same products as for toluene. Assuming a 1:1:1 proportion in xylenes emissions the analogous toluene product is produced with a rate constant equal to  $(1.36\text{E-}11 \cdot 0.55 + 2.31\text{E-}11 \cdot 0.50 + 1.43\text{E-}11 \cdot 0.625)/3$ , where k and coefficients are for the single isomers ortho, meta and para from MCM.

G48401: Same products as for toluene. The rate constant is the average of m, p, o  $k = (4.10\text{E-}16 + 2.60\text{E-}16 + 5.00\text{E-}16)/3 = 3.9\text{E-}16$ .

G48402: merged under same rate constant

G48403: Same products as for toluene

G48405: KDEC CH2OOB  $\rightarrow$  0.24 CH2OO + 0.40 CO + 0.36 HO2 + 0.36 CO + 0.36 OH and H2O + PH-CHOO  $\rightarrow$  0.625 PHCOOH + 0.375 BENZAL + 0.375 H2O2 + 0.2 CO2

G48408: KDEC NSTYRENEO  $\rightarrow$  NO2 + HCHO + BENZAL

G48409: KDEC NSTYRENEO  $\rightarrow$  NO<sub>2</sub> + HCHO + BENZAL

G48410: KDEC NSTYRENEO  $\rightarrow$  NO<sub>2</sub> + HCHO + BENZAL

G48412b: KDEC STYRENO  $\rightarrow$  HO<sub>2</sub> + HCHO + BENZAL and reactions with KRO<sub>2</sub>HO<sub>2</sub>.

G48413: KDEC STYRENO  $\rightarrow$  HO<sub>2</sub> + HCHO + BENZAL

G48414: KDEC STYRENO  $\rightarrow$  HO<sub>2</sub> + HCHO + BENZAL

G48415: KDEC STYRENO  $\rightarrow$  HO<sub>2</sub> + HCHO + BENZAL

G49207: Alkyl nitrate formation neglected.

G49238: Alkyl nitrate formation neglected.

G49246: Only this channel considered as the intermediate radical is likely more stable than CHCH(OH)<sub>2</sub>. Instead of the (lacking) carbonyl a product of further degradation is assumed.

G49247: Theoretical keto-enol tautomerization catalyzed by formic acid (Grenfell et al., 2006).

G49248: Theoretical keto-enol tautomerization catalyzed by formic acid (Grenfell et al., 2006).

G49400a: Same products as for toluene. Assuming a 1:1:1 proportion in xylenes emissions the analogous toluene product is produced with a rate constant equal to  $(3.27\text{E-}11*0.21 + 3.25\text{E-}11*0.30 + 5.67\text{E-}11*0.14)/3$ , where k and coefficients are for the single isomers 1,2,3-, 1,3,4- and 1,3,5- from MCM.

G49400b: Same products as for toluene. Assuming a 1:1:1 proportion in xylenes emissions the analogous toluene product is produced with a rate constant equal to  $(3.27\text{E-}11*0.06 + 3.25\text{E-}11*0.06 + 5.67\text{E-}11*0.03)/3$ , where k and coefficients are for the single isomers 1,2,3-, 1,3,4- and 1,3,5- from MCM.

G49400c: Same products as for toluene. Assuming a 1:1:1 proportion in xylenes emissions the analogous toluene product is produced with a rate constant equal to  $(3.27\text{E-}11*0.03 + 3.25\text{E-}11*0.03 + 5.67\text{E-}11*0.04)/3$ , where k and coefficients are for the single isomers 1,2,3-, 1,3,4- and 1,3,5- from MCM.

G49400d: Same products as for toluene. Assuming a 1:1:1 proportion in xylenes emissions the analogous toluene product is produced with a rate constant equal to  $(3.27\text{E-}11*0.70 + 3.25\text{E-}11*0.61 + 5.67\text{E-}11*0.79)/3$ , where k and coefficients are for the single isomers 1,2,3-, 1,3,4- and 1,3,5- from MCM.

G49401: Same products as for toluene. The rate constant is the average of m, p, o  $k=(1.90+1.80+0.88)\text{E-}15/3=1.52\text{E-}15$ .

G40200: Products from Vereecken et al. (2007). LAP-INABO<sub>2</sub> = 0.65 APINAO<sub>2</sub> + 0.35 APINBO<sub>2</sub>

G40203: Weighted average for isomers A and B,  $k = 0.33*9.20\text{E-}14+0.67*8.80\text{E-}13$ .

G40204: Weighted average for isomers A and B,  $k = 0.35*1.83\text{E-}11+0.65*3.28\text{E-}11$ .

G40205: Weighted average for isomers A and B,  $k = 0.35*5.50\text{E-}12+0.65*3.64\text{E-}12$ .

G40206: SAR-estimated rate constant,  $(k_{\text{ads}}+k_{\text{adt}})*\text{acoch3} = 6.46\text{E-}11$  where  $k_{\text{ads}} = 3.0\text{E-}11$ ,  $k_{\text{adt}} = 5.5\text{E-}11$ ,  $\text{acoch3} = 0.76$

G40207: Alkyl nitrate formation neglected.

G40211: Products from Rickard (2022).

G40212: Products from Rickard (2022).

G40232: Products from Capouet et al. (2008).

G40242: Alkyl nitrate formation neglected.

G40246: Products from Rickard (2022).

G40248: Alkyl nitrate formation neglected.

G40252a: Products from Vereecken and Peeters (2012).

G40252b: Products from Vereecken and Peeters (2012).

G40259: ROO6R1OOH is produced but no sink for it.

G40262: RO6R1OOH is produced but no sink for it.

G40266: Rate constant modified according to MCM protocol.

G40267a: Products from Nguyen et al. (2009).

G40268: Products from Rickard (2022).

G40270: Alkyl nitrate neglected.

G40274: As for RO6R1NO<sub>3</sub> in G4085.

G40276: Only this channel considered as the intermediate radical is likely more stable than CHCH(OH)<sub>2</sub>.

G40277: Theoretical keto-enol tautomerization catalyzed by formic acid (Grenfell et al., 2006).

G40278: Theoretical keto-enol tautomerization catalyzed by formic acid (Grenfell et al., 2006).

G40282a: Products from Vereecken and Peeters (2012).

G40282b: Products from Vereecken and Peeters (2012).

G40283a: Products from Nguyen et al. (2009).

G40284: Products from Rickard (2022).

G40285a: Products from Vereecken and Peeters (2012).

G40285b: Products from Vereecken and Peeters (2012).

G40286a: Products from Nguyen et al. (2009).

G40287: Products from Rickard (2022).

G40400: DIET35TOL(from MCM) as representative of higher aromatics

G40401: Same products as for toluene.

G6103: The rate coefficient is defined as backward reaction divided by equilibrium constant.

G6204: At low temperatures, there may be a minor reaction channel leading to O<sub>3</sub>+HCl. See Finkbeiner et al. (1995) for details. It is neglected here.

**G6402:** The initial products are probably HCl and CH<sub>2</sub>OOH (Atkinson et al., 2006). It is assumed that CH<sub>2</sub>OOH dissociates into HCHO and OH.

**G6409:** It is assumed that the reaction liberates all Cl atoms in the form of HCl.

**G643DT:** H-abstraction channel producing HCl. Organic peroxy radicals (crudely) approximated with the ones from reaction with OH.

**G644DT:** Cl-addition channel. Chlorinated organic peroxy radicals (crudely) approximated with the ones from reaction with OH.

**G652DT:** Product distribution could be different.

**G654DT:** By using LMEKO2 (lumped RO2 from reaction with OH) the assumed yield of the isomer MEKBO2 is 0.62 instead of 0.79 as recommended by IUPAC.

**G7302:** The rate coefficient is:  $k_{\text{BrO}_2\text{NO}_2} = k_{3\text{rd}}(\text{temp}, \text{cair}, 5.2\text{E-}31, 3.2, 6.9\text{E-}12, 2.9, 0.6)$ .

**G7303:** The rate coefficient is defined as backward reaction (Atkinson et al., 2007) divided by equilibrium constant (Orlando and Tyndall, 1996).

**G7404:** It is assumed that the reaction liberates all Br atoms in the form of HBr.

**G7407:** It is assumed that the reaction liberates all Br atoms. The fate of the carbon atom is currently not considered.

**G7408:** It is assumed that the reaction liberates all Br atoms. The fate of the carbon atom is currently not considered.

**G7605:** Same value as for G7408: CH<sub>2</sub>Br<sub>2</sub>+OH assumed. It is assumed that the reaction liberates all Br and Cl atoms. The fate of the carbon atom is currently not considered.

**G7606:** Same value as for G7408: CH<sub>2</sub>Br<sub>2</sub>+OH assumed. It is assumed that the reaction liberates all Br and Cl atoms. The fate of the carbon atom is currently not considered.

**G7607:** It is assumed that the reaction liberates all Br and Cl atoms. The fate of the carbon atom is currently not considered.

**G9400a:** For the abstraction path, the assumed reaction sequence (omitting H<sub>2</sub>O and O<sub>2</sub> as products) according

to Yin et al. (1990) is:

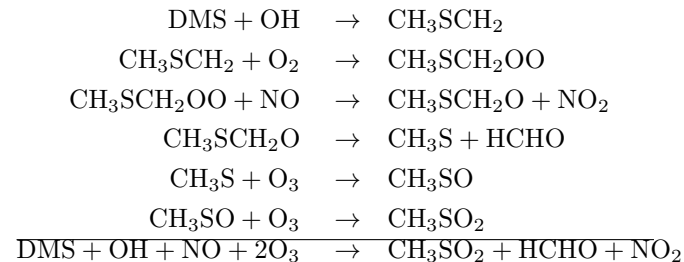

Neglecting the effect on O<sub>3</sub> and NO<sub>x</sub>, the remaining reaction is:

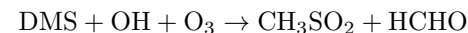

**G9400b:** For the addition path, the rate coefficient is:  $k_{\text{DMS}_2\text{OH}} = 1.0\text{E-}39 * \text{EXP}(5820./\text{temp}) * C(\text{ind}_2) / (1. + 5.0\text{E-}30 * \text{EXP}(6280./\text{temp}) * C(\text{ind}_2))$ .

**G9402:** Products and yields are not from Hynes and Wine (1996).

**G9408:** Average of 3.9E-11 and 3.42E-11.

Table 2: Photolysis reactions

| #       | labels    | reaction                                                                                                                                                          | rate coefficient     | reference             |
|---------|-----------|-------------------------------------------------------------------------------------------------------------------------------------------------------------------|----------------------|-----------------------|
| J (gas) |           |                                                                                                                                                                   |                      |                       |
| J1000a  | UpStTrGJ  | $\text{O}_2 + h\nu \rightarrow \text{O}(^3\text{P}) + \text{O}(^3\text{P})$                                                                                       | jx(ip_02)            | Sander et al. (2014)  |
| J1001a  | UpStTrGJ  | $\text{O}_3 + h\nu \rightarrow \text{O}(^1\text{D}) + \text{O}_2$                                                                                                 | jx(ip_01D)           | Sander et al. (2014)  |
| J1001b  | UpStTrGJ  | $\text{O}_3 + h\nu \rightarrow \text{O}(^3\text{P}) + \text{O}_2$                                                                                                 | jx(ip_03P)           | Sander et al. (2014)  |
| J2101   | UpStTrGJ  | $\text{H}_2\text{O}_2 + h\nu \rightarrow 2 \text{OH}$                                                                                                             | jx(ip_H202)          | Sander et al. (2014)  |
| J3101   | UpStTrGJN | $\text{NO}_2 + h\nu \rightarrow \text{NO} + \text{O}(^3\text{P})$                                                                                                 | jx(ip_N02)           | Sander et al. (2014)  |
| J3103a  | UpStTrGJN | $\text{NO}_3 + h\nu \rightarrow \text{NO}_2 + \text{O}(^3\text{P})$                                                                                               | jx(ip_N020)          | Sander et al. (2014)  |
| J3103b  | UpStTrGJN | $\text{NO}_3 + h\nu \rightarrow \text{NO} + \text{O}_2$                                                                                                           | jx(ip_N002)          | Sander et al. (2014)  |
| J3104   | StTrGJN   | $\text{N}_2\text{O}_5 + h\nu \rightarrow \text{NO}_2 + \text{NO}_3$                                                                                               | jx(ip_N205)          | Sander et al. (2014)  |
| J3200   | TrGJN     | $\text{HONO} + h\nu \rightarrow \text{NO} + \text{OH}$                                                                                                            | jx(ip_H0NO)          | Sander et al. (2014)  |
| J3201   | StTrGJN   | $\text{HNO}_3 + h\nu \rightarrow \text{NO}_2 + \text{OH}$                                                                                                         | jx(ip_HN03)          | Sander et al. (2014)  |
| J3202   | StTrGJN   | $\text{HNO}_4 + h\nu \rightarrow .667 \text{NO}_2 + .667 \text{HO}_2 + .333 \text{NO}_3 + .333 \text{OH}$                                                         | jx(ip_HN04)          | Sander et al. (2014)  |
| J41000  | StTrGJ    | $\text{CH}_3\text{OOH} + h\nu \rightarrow \text{CH}_3\text{O} + \text{OH}$                                                                                        | jx(ip_CH300H)        | Sander et al. (2014)  |
| J41001a | StTrGJ    | $\text{HCHO} + h\nu \rightarrow \text{H}_2 + \text{CO}$                                                                                                           | jx(ip_COH2)          | Sander et al. (2014)  |
| J41001b | StTrGJ    | $\text{HCHO} + h\nu \rightarrow \text{H} + \text{CO} + \text{HO}_2$                                                                                               | jx(ip_CH0H)          | Sander et al. (2014)  |
| J41004  | StTrGJN   | $\text{CH}_3\text{ONO} + h\nu \rightarrow \text{CH}_3\text{O} + \text{NO}$                                                                                        | jx(ip_CH30NO)        | Sander et al. (2014)  |
| J41005  | StTrGJN   | $\text{CH}_3\text{ONO}_2 + h\nu \rightarrow \text{CH}_3\text{O} + \text{NO}_2$                                                                                    | jx(ip_CH3N03)        | Sander et al. (2014)  |
| J41006  | StTrGJN   | $\text{CH}_3\text{O}_2\text{NO}_2 + h\nu \rightarrow .667 \text{NO}_2 + .667 \text{CH}_3\text{O}_2 + .333 \text{NO}_3 + .333 \text{CH}_3\text{O}$                 | jx(ip_CH302N02)      | Sander et al. (2014)* |
| J41007  | StTrGJ    | $\text{HOCH}_2\text{OOH} + h\nu \rightarrow \text{HCOOH} + \text{OH} + \text{HO}_2$                                                                               | jx(ip_CH300H)        | Sander et al. (2014)  |
| J41008  | StTrGJ    | $\text{CH}_3\text{O}_2 + h\nu \rightarrow \text{HCHO} + \text{OH}$                                                                                                | jx(ip_CH302)         | Sander et al. (2014)  |
| J41009  | StTrGJ    | $\text{HCOOH} + h\nu \rightarrow \text{CO} + \text{HO}_2 + \text{OH}$                                                                                             | jx(ip_HCO0H)         | Sander et al. (2014)  |
| J41010  | StTrGJN   | $\text{HOCH}_2\text{O}_2\text{NO}_2 + h\nu \rightarrow .667 \text{NO}_2 + .667 \text{HOCH}_2\text{O}_2 + .333 \text{NO}_3 + .333 \text{HCOOH} + .333 \text{HO}_2$ | jx(ip_CH302N02)      | Sander et al. (2014)  |
| J42000  | TrGJC     | $\text{C}_2\text{H}_5\text{OOH} + h\nu \rightarrow \text{CH}_3\text{CHO} + \text{HO}_2 + \text{OH}$                                                               | jx(ip_CH300H)        | von Kuhlmann (2001)   |
| J42001a | TrGJC     | $\text{CH}_3\text{CHO} + h\nu \rightarrow \text{CH}_3 + \text{HO}_2 + \text{CO}$                                                                                  | jx(ip_CH3CHO)        | Sander et al. (2014)  |
| J42001b | TrGJC     | $\text{CH}_3\text{CHO} + h\nu \rightarrow \text{CH}_2\text{CHOH}$                                                                                                 | jx(ip_CH3CHO2VINY)   | Clubb et al. (2012)   |
| J42002  | TrGJC     | $\text{CH}_3\text{C}(\text{O})\text{OOH} + h\nu \rightarrow \text{CH}_3 + \text{OH} + \text{CO}_2$                                                                | jx(ip_CH3C03H)       | Sander et al. (2014)  |
| J42004  | TrGJCN    | $\text{PAN} + h\nu \rightarrow .7 \text{CH}_3\text{C}(\text{O}) + .7 \text{NO}_2 + .3 \text{CH}_3 + .3 \text{CO}_2 + .3 \text{NO}_3$                              | jx(ip_PAN)           | Sander et al. (2014)* |
| J42005a | TrGJC     | $\text{HOCH}_2\text{CHO} + h\nu \rightarrow \text{HCHO} + 2 \text{HO}_2 + \text{CO}$                                                                              | jx(ip_HOCH2CHO)*0.83 | Sander et al. (2014)* |
| J42005b | TrGJC     | $\text{HOCH}_2\text{CHO} + h\nu \rightarrow \text{OH} + \text{HCOCH}_2\text{O}_2$                                                                                 | jx(ip_HOCH2CHO)*0.07 | Sander et al. (2014)* |
| J42005c | TrGJC     | $\text{HOCH}_2\text{CHO} + h\nu \rightarrow \text{CH}_3\text{OH} + \text{CO}$                                                                                     | jx(ip_HOCH2CHO)*0.10 | Sander et al. (2014)* |
| J42006  | TrGJC     | $\text{HOCH}_2\text{CO}_3\text{H} + h\nu \rightarrow \text{HCHO} + \text{HO}_2 + \text{OH} + \text{CO}_2$                                                         | jx(ip_CH300H)        | Rickard (2022)        |

Table 2: Photolysis reactions (... continued)

| #      | labels   | reaction                                                                                                                                                                                            | rate coefficient                                                                              | reference                   |
|--------|----------|-----------------------------------------------------------------------------------------------------------------------------------------------------------------------------------------------------|-----------------------------------------------------------------------------------------------|-----------------------------|
| J42007 | TrGJCN   | $\text{PHAN} + h\nu \rightarrow .7 \text{HOCH}_2\text{CO} + .7 \text{NO}_2 + .3 \text{HCHO} + .3 \text{HO}_2 + .3 \text{CO}_2 + .3 \text{NO}_3$                                                     | jx(ip_PAN)                                                                                    | see note*                   |
| J42008 | TrGJC    | $\text{GLYOX} + h\nu \rightarrow 2 \text{CO} + 2 \text{HO}_2$                                                                                                                                       | jx(ip_GLYOX)                                                                                  | Sander et al. (2014)        |
| J42009 | TrGJC    | $\text{HCOCO}_2\text{H} + h\nu \rightarrow 2 \text{HO}_2 + \text{CO} + \text{CO}_2$                                                                                                                 | jx(ip_MGLYOX)                                                                                 | Rickard (2022)              |
| J42010 | TrGJC    | $\text{HCOCO}_3\text{H} + h\nu \rightarrow \text{HO}_2 + \text{CO} + \text{OH} + \text{CO}_2$                                                                                                       | jx(ip_CH300H)+jx(ip_HOCH2CHO)                                                                 | Rickard (2022)              |
| J42011 | TrGJC    | $\text{HYETHO}_2\text{H} + h\nu \rightarrow \text{HOCH}_2\text{CH}_2\text{O} + \text{OH}$                                                                                                           | jx(ip_CH300H)                                                                                 | Rickard (2022)              |
| J42012 | TrGJCN   | $\text{ETHOHNO}_3 + h\nu \rightarrow \text{HO}_2 + 2 \text{HCHO} + \text{NO}_2$                                                                                                                     | j_IC3H7N03                                                                                    | Rickard (2022)              |
| J42013 | TrGJC    | $\text{HOOCH}_2\text{CO}_3\text{H} + h\nu \rightarrow \text{OH} + \text{HCHO} + \text{CO}_2 + \text{OH}$                                                                                            | 2.*jx(ip_CH300H)                                                                              | Sander et al. (2019)        |
| J42014 | TrGC     | $\text{HOOCH}_2\text{CO}_2\text{H} + h\nu \rightarrow \text{OH} + \text{HCHO} + \text{HO}_2 + \text{CO}_2$                                                                                          | jx(ip_CH300H)                                                                                 | Sander et al. (2019)        |
| J42015 | TrGC     | $\text{CH}_2\text{CO} + h\nu \rightarrow .4 \text{CO}_2 + .8 \text{H} + .34 \text{CO} + .34 \text{OH} + .34 \text{HO}_2 + .16 \text{HCHO} + .16 \text{O}(^3\text{P}) + .1 \text{HCOOH} + \text{CO}$ | j_ketene*0.36                                                                                 | Sander et al. (2019)        |
| J42016 | TrGC     | $\text{CH}_3\text{CHOHOOH} + h\nu \rightarrow \text{CH}_3 + \text{HCOOH} + \text{OH}$                                                                                                               | jx(ip_CH300H)                                                                                 | Sander et al. (2019)        |
| J42017 | TrGJCN   | $\text{NO}_3\text{CH}_2\text{CHO} + h\nu \rightarrow \text{HO}_2 + \text{CO} + \text{HCHO} + \text{NO}_2$                                                                                           | (jx(ip_C2H5N03)+jx(ip_CH3CHO))<br>*(jx(ip_NOA)+1E-10)/(0.59*j_IC3H7N03+jx(ip_CH3COCH3)+1E-10) | Sander et al. (2019)*       |
| J42018 | TrGJC    | $\text{HOOCH}_2\text{CHO} + h\nu \rightarrow \text{OH} + \text{HCHO} + \text{CO} + \text{HO}_2$                                                                                                     | jx(ip_CH300H)+jx(ip_HOCH2CHO)                                                                 | Sander et al. (2019)        |
| J42019 | TrGJCN   | $\text{C}_2\text{H}_5\text{ONO}_2 + h\nu \rightarrow \text{CH}_3\text{CHO} + \text{HO}_2 + \text{NO}_2$                                                                                             | jx(ip_C2H5N03)                                                                                | Sander et al. (2019)        |
| J42020 | TrGJCN   | $\text{NO}_3\text{CH}_2\text{CHO} + h\nu \rightarrow .7 \text{NO}_3\text{CH}_2\text{CO}_3 + .7 \text{NO}_2 + .3 \text{HCHO} + .3 \text{NO}_2 + .3 \text{CO}_2 + .3 \text{NO}_3$                     | jx(ip_PAN)                                                                                    | Sander et al. (2019)*       |
| J42021 | StTrGJCN | $\text{C}_2\text{H}_5\text{O}_2\text{NO}_2 + h\nu \rightarrow .667 \text{NO}_2 + .667 \text{C}_2\text{H}_5\text{O}_2 + .333 \text{NO}_3 + .333 \text{CH}_3\text{CHO} + .333 \text{HO}_2$            | jx(ip_CH302N02)                                                                               | Sander et al. (2019)*       |
| J42022 | TrGJC    | $\text{HOCCOOH} + h\nu \rightarrow \text{CO}_2 + .72 \text{HCOOH} + .28 \text{CO} + .28 \text{H}_2\text{O}$                                                                                         | jx(ip_H00CC00H)                                                                               | Yamamoto and Back (1985)    |
| J43000 | TrGJC    | $\text{iC}_3\text{H}_7\text{OOH} + h\nu \rightarrow \text{CH}_3\text{COCH}_3 + \text{HO}_2 + \text{OH}$                                                                                             | jx(ip_CH300H)                                                                                 | von Kuhlmann (2001)         |
| J43001 | TrGJC    | $\text{CH}_3\text{COCH}_3 + h\nu \rightarrow \text{CH}_3\text{C}(\text{O}) + \text{CH}_3$                                                                                                           | jx(ip_CH3C0CH3)                                                                               | Sander et al. (2014)        |
| J43002 | TrGJC    | $\text{CH}_3\text{COCH}_2\text{OH} + h\nu \rightarrow .5 \text{CH}_3\text{C}(\text{O}) + .5 \text{HCHO} + .5 \text{HO}_2 + .5 \text{HOCH}_2\text{CO} + .5 \text{CH}_3$                              | j_ACETOL                                                                                      | Sander et al. (2014)*       |
| J43003 | TrGJC    | $\text{MGLYOX} + h\nu \rightarrow \text{CH}_3\text{C}(\text{O}) + \text{CO} + \text{HO}_2$                                                                                                          | jx(ip_MGLYOX)                                                                                 | Sander et al. (2014)        |
| J43004 | TrGJC    | $\text{CH}_3\text{COCH}_2\text{O}_2\text{H} + h\nu \rightarrow \text{CH}_3\text{C}(\text{O}) + \text{HCHO} + \text{OH}$                                                                             | jx(ip_CH300H)+j_ACETOL                                                                        | Rickard (2022)              |
| J43005 | TrGJC    | $\text{HOCH}_2\text{COCH}_2\text{OOH} + h\nu \rightarrow \text{HOCH}_2\text{CO} + \text{HCHO} + \text{OH}$                                                                                          | jx(ip_CH300H)+j_ACETOL                                                                        | Sander et al. (2019)        |
| J43006 | TrGJCN   | $\text{iC}_3\text{H}_7\text{ONO}_2 + h\nu \rightarrow \text{CH}_3\text{COCH}_3 + \text{NO}_2 + \text{HO}_2$                                                                                         | j_IC3H7N03                                                                                    | von Kuhlmann et al. (2003)* |
| J43007 | TrGJCN   | $\text{NOA} + h\nu \rightarrow \text{CH}_3\text{C}(\text{O}) + \text{HCHO} + \text{NO}_2$                                                                                                           | jx(ip_NOA)                                                                                    | Barnes et al. (1993)        |
| J43009 | TrGJC    | $\text{HYPROPO}_2\text{H} + h\nu \rightarrow \text{CH}_3\text{CHO} + \text{HCHO} + \text{HO}_2 + \text{OH}$                                                                                         | jx(ip_CH300H)                                                                                 | Rickard (2022)              |
| J43010 | TrGJCN   | $\text{PR}_2\text{O}_2\text{HNO}_3 + h\nu \rightarrow \text{NOA} + \text{HO}_2 + \text{OH}$                                                                                                         | jx(ip_CH300H)                                                                                 | Rickard (2022)              |

Table 2: Photolysis reactions (... continued)

| #       | labels   | reaction                                                                                                                                                                                                                                                                                                                | rate coefficient                                                             | reference                                    |
|---------|----------|-------------------------------------------------------------------------------------------------------------------------------------------------------------------------------------------------------------------------------------------------------------------------------------------------------------------------|------------------------------------------------------------------------------|----------------------------------------------|
| J43011  | TrGJC    | $\text{HOCH}_2\text{COCHO} + h\nu \rightarrow \text{HOCH}_2\text{CO} + \text{CO} + \text{HO}_2$                                                                                                                                                                                                                         | $\text{jx}(\text{ip\_MGLYOX})$                                               | Rickard (2022)                               |
| J43012  | TrGJC    | $\text{HCOCOCH}_2\text{OOH} + h\nu \rightarrow \text{HCOCO} + \text{HCHO} + \text{OH}$                                                                                                                                                                                                                                  | $\text{jx}(\text{ip\_CH300H}) + \text{j\_ACETOL}$                            | Sander et al. (2019)                         |
| J43013  | TrGJC    | $\text{HCOCOCH}_2\text{OOH} + h\nu \rightarrow \text{HOOCH}_2\text{CO}_3 + \text{CO} + \text{HO}_2$                                                                                                                                                                                                                     | $\text{jx}(\text{ip\_MGLYOX})$                                               | Sander et al. (2019)                         |
| J43014  | TrGJTerC | $\text{HCOCH}_2\text{CHO} + h\nu \rightarrow \text{HCOCH}_2\text{O}_2 + \text{HO}_2 + \text{CO}$                                                                                                                                                                                                                        | $\text{jx}(\text{ip\_HOCH}_2\text{CHO}) * 2.$                                | Rickard (2022)                               |
| J43015  | TrGJTerC | $\text{HCOCH}_2\text{CO}_2\text{H} + h\nu \rightarrow \text{HCOCH}_2\text{O}_2 + \text{CO}_2 + \text{HO}_2$                                                                                                                                                                                                             | $\text{jx}(\text{ip\_HOCH}_2\text{CHO})$                                     | Rickard (2022)                               |
| J43016  | TrGJTerC | $\text{HOC}_2\text{H}_4\text{CO}_3\text{H} + h\nu \rightarrow \text{HOCH}_2\text{CH}_2\text{O}_2 + \text{CO}_2 + \text{OH}$                                                                                                                                                                                             | $\text{jx}(\text{ip\_CH300H})$                                               | Rickard (2022)                               |
| J43017  | TrGJC    | $\text{HCOCOCHO} + h\nu \rightarrow \text{HCOCO} + \text{HO}_2 + \text{CO}$                                                                                                                                                                                                                                             | $2 * \text{jx}(\text{ip\_MGLYOX})$                                           | Sander et al. (2019)                         |
| J43018  | TrGJC    | $\text{CH}_3\text{COCO}_2\text{H} + h\nu \rightarrow .32 \text{CH}_3\text{CHO} + .16 \text{CH}_2\text{CHOH} + .54 \text{CO}_2 + .38 \text{CH}_3\text{C}(\text{O}) + .38 \text{HO}_2 + .38 \text{CO}_2 + .07 \text{CH}_3\text{COOH} + .07 \text{CO} + .05 \text{CH}_3\text{C}(\text{O}) + .05 \text{CO} + .05 \text{OH}$ | $\text{jx}(\text{ip\_CH3COCOC}_2\text{H})$                                   | Sander et al. (2019)*                        |
| J43019  | TrGC     | $\text{CH}_3\text{COCO}_3\text{H} + h\nu \rightarrow \text{CH}_3\text{C}(\text{O}) + \text{OH} + \text{CO}_2$                                                                                                                                                                                                           | $\text{jx}(\text{ip\_MGLYOX}) + \text{jx}(\text{ip\_CH300H})$                | Sander et al. (2019)                         |
| J43020  | TrGC     | $\text{CH}_3\text{CHCO} + h\nu \rightarrow \text{C}_2\text{H}_4 + \text{CO}$                                                                                                                                                                                                                                            | $\text{j\_ketene} * 0.36 * 2.$                                               | Sander et al. (2019)                         |
| J43021  | TrGCN    | $\text{PROPOLNO}_3 + h\nu \rightarrow \text{HOCH}_2\text{CHO} + \text{HCHO} + \text{HO}_2 + \text{NO}_2$                                                                                                                                                                                                                | $\text{j\_IC3H7N03}$                                                         | Sander et al. (2019)                         |
| J43022  | TrGCN    | $\text{CH}_3\text{COCH}_2\text{OONO}_2 + h\nu \rightarrow \text{CH}_3\text{C}(\text{O}) + \text{HCHO} + \text{NO}_3$                                                                                                                                                                                                    | $\text{jx}(\text{ip\_CH302N02}) + \text{jx}(\text{ip\_CH3COCH}_3)$           | Sander et al. (2019)                         |
| J43023  | TrGJC    | $\text{C}_3\text{H}_7\text{OOH} + h\nu \rightarrow \text{C}_2\text{H}_5\text{CHO} + \text{HO}_2 + \text{OH}$                                                                                                                                                                                                            | $\text{jx}(\text{ip\_CH300H})$                                               | von Kuhlmann (2001)                          |
| J43024  | TrGJCN   | $\text{C}_3\text{H}_7\text{ONO}_2 + h\nu \rightarrow \text{C}_2\text{H}_5\text{CHO} + \text{NO}_2 + \text{HO}_2$                                                                                                                                                                                                        | $0.59 * \text{j\_IC3H7N03}$                                                  | see note*                                    |
| J43025a | TrGJC    | $\text{C}_2\text{H}_5\text{CHO} + h\nu \rightarrow \text{C}_2\text{H}_5\text{O}_2 + \text{HO}_2 + \text{CO}$                                                                                                                                                                                                            | $\text{jx}(\text{ip\_C}_2\text{H}_5\text{CHO}_2\text{HCO})$                  | see note*                                    |
| J43025b | TrGJC    | $\text{C}_2\text{H}_5\text{CHO} + h\nu \rightarrow \text{CH}_2\text{CHCH}_2\text{OH}$                                                                                                                                                                                                                                   | $\text{jx}(\text{ip\_C}_2\text{H}_5\text{CHO}_2\text{ENOL})$                 | Andrews et al. (2012), Sander et al. (2019)* |
| J43026  | TrGJCN   | $\text{PPN} + h\nu \rightarrow .7 \text{C}_2\text{H}_5\text{CO}_3 + .7 \text{NO}_2 + .3 \text{C}_2\text{H}_5\text{O}_2 + .3 \text{CO}_2 + .3 \text{NO}_3$                                                                                                                                                               | $\text{jx}(\text{ip\_PAN})$                                                  | Sander et al. (2014)                         |
| J43027  | TrGJC    | $\text{C}_2\text{H}_5\text{CO}_3\text{H} + h\nu \rightarrow \text{C}_2\text{H}_5\text{O}_2 + \text{CO}_2 + \text{OH}$                                                                                                                                                                                                   | $\text{jx}(\text{ip\_CH300H})$                                               | von Kuhlmann (2001)                          |
| J43028a | TrGJC    | $\text{HCOCOCH}_2\text{OOH} + h\nu \rightarrow \text{HOOCH}_2\text{CO}_3 + \text{CO} + \text{HO}_2$                                                                                                                                                                                                                     | $\text{jx}(\text{ip\_MGLYOX})$                                               | Sander et al. (2019)                         |
| J43028b | TrGJC    | $\text{HCOCOCH}_2\text{OOH} + h\nu \rightarrow \text{HCOCO} + \text{HCHO} + \text{OH}$                                                                                                                                                                                                                                  | $\text{jx}(\text{ip\_HOCH}_2\text{CHO}) + \text{jx}(\text{ip\_CH300H})$      | Sander et al. (2019)                         |
| J43200  | TrGJTerC | $\text{HCOCH}_2\text{CO}_3\text{H} + h\nu \rightarrow \text{HCOCH}_2\text{O}_2 + \text{CO}_2 + \text{OH}$                                                                                                                                                                                                               | $\text{jx}(\text{ip\_HOCH}_2\text{CHO}) + \text{jx}(\text{ip\_CH300H})$      | Rickard (2022)                               |
| J43400  | TrGJAroC | $\text{C}_3\text{DIALOOH} + h\nu \rightarrow \text{GLYOX} + \text{CO} + \text{HO}_2 + \text{OH}$                                                                                                                                                                                                                        | $\text{jx}(\text{ip\_HOCH}_2\text{CHO}) * 2. + \text{jx}(\text{ip\_CH300H})$ | Rickard (2022)*                              |
| J43401  | TrGJAroC | $\text{C}_3\text{OH}_2\text{CO} + h\nu \rightarrow \text{GLYOX} + \text{HO}_2 + \text{HO}_2 + \text{CO}$                                                                                                                                                                                                                | $\text{jx}(\text{ip\_HOCH}_2\text{CHO}) * 2.$                                | Rickard (2022)                               |
| J43402  | TrGJAroC | $\text{HCOCOHCO}_3\text{H} + h\nu \rightarrow \text{GLYOX} + \text{HO}_2 + \text{CO}_2 + \text{OH}$                                                                                                                                                                                                                     | $\text{jx}(\text{ip\_CH300H})$                                               | Rickard (2022)                               |
| J44000a | TrGJC    | $\text{LC}_4\text{H}_9\text{OOH} + h\nu \rightarrow \text{OH} + \text{C}_3\text{H}_7\text{CHO} + \text{HO}_2$                                                                                                                                                                                                           | $\text{jx}(\text{ip\_CH300H}) * (\text{k\_p} / (\text{k\_p} + \text{k\_s}))$ | Rickard (2022), Sander et al. (2019)         |
| J44000b | TrGJC    | $\text{LC}_4\text{H}_9\text{OOH} + h\nu \rightarrow \text{OH} + .636 \text{MEK} + .636 \text{HO}_2 + .364 \text{CH}_3\text{CHO} + .364 \text{C}_2\text{H}_5\text{O}_2$                                                                                                                                                  | $\text{jx}(\text{ip\_CH300H}) * (\text{k\_s} / (\text{k\_p} + \text{k\_s}))$ | Rickard (2022), Sander et al. (2019)         |
| J44001  | TrGJC    | $\text{MVK} + h\nu \rightarrow .5 \text{C}_3\text{H}_6 + .5 \text{CH}_3\text{C}(\text{O}) + .5 \text{HCHO} + \text{CO} + .5 \text{HO}_2$                                                                                                                                                                                | $\text{jx}(\text{ip\_MVK})$                                                  | Sander et al. (2014)                         |

Table 2: Photolysis reactions (... continued)

| #       | labels   | reaction                                                                                                                                                                                                                                                                                                        | rate coefficient                                                        | reference                             |
|---------|----------|-----------------------------------------------------------------------------------------------------------------------------------------------------------------------------------------------------------------------------------------------------------------------------------------------------------------|-------------------------------------------------------------------------|---------------------------------------|
| J44002  | TrGJC    | $\text{MEK} + h\nu \rightarrow \text{CH}_3\text{C}(\text{O}) + \text{C}_2\text{H}_5\text{O}_2$                                                                                                                                                                                                                  | $0.42 \cdot j_x(\text{ip\_CHOH})$                                       | von Kuhlmann et al. (2003)            |
| J44003  | TrGJC    | $\text{LMEKOOH} + h\nu \rightarrow .62 \text{ CH}_3\text{C}(\text{O}) + .62 \text{ CH}_3\text{CHO} + .38 \text{ HCHO} + .38 \text{ CO}_2 + .38 \text{ HOCH}_2\text{CH}_2\text{O}_2 + \text{OH}$                                                                                                                 | $j_x(\text{ip\_CH300H}) + 0.42 \cdot j_x(\text{ip\_CHOH})$              | Sander et al. (2019)                  |
| J44004  | TrGJC    | $\text{BIACET} + h\nu \rightarrow 2 \text{ CH}_3\text{C}(\text{O})$                                                                                                                                                                                                                                             | $2.15 \cdot j_x(\text{ip\_MGLYOX})$                                     | see note*                             |
| J44005a | TrGJCN   | $\text{LC4H9NO}_3 + h\nu \rightarrow \text{NO}_2 + \text{C}_3\text{H}_7\text{CHO} + \text{HO}_2$                                                                                                                                                                                                                | $j\_IC3H7N03 \cdot (k\_p / (k\_p + k\_s))$                              | see note*                             |
| J44005b | TrGJCN   | $\text{LC4H9NO}_3 + h\nu \rightarrow \text{NO}_2 + \text{MEK} + \text{HO}_2$                                                                                                                                                                                                                                    | $j\_IC3H7N03 \cdot (k\_s / (k\_p + k\_s))$                              | see note*                             |
| J44006  | TrGJCN   | $\text{MPAN} + h\nu \rightarrow .7 \text{ MACO}_3 + .7 \text{ NO}_2 + .3 \text{ MACO}_2 + .3 \text{ NO}_3$                                                                                                                                                                                                      | $j_x(\text{ip\_PAN})$                                                   | see note*                             |
| J44007a | TrGJC    | $\text{CO}_2\text{H}_3\text{CO}_3\text{H} + h\nu \rightarrow \text{MGLYOX} + \text{HO}_2 + \text{OH} + \text{CO}_2$                                                                                                                                                                                             | $j_x(\text{ip\_CH300H})$                                                | Rickard (2022)                        |
| J44007b | TrGJC    | $\text{CO}_2\text{H}_3\text{CO}_3\text{H} + h\nu \rightarrow \text{CH}_3\text{C}(\text{O}) + \text{HO}_2 + \text{HCOCO}_3\text{H}$                                                                                                                                                                              | $j\_ACETOL$                                                             | Rickard (2022)                        |
| J44008  | TrGJC    | $\text{MACR} + h\nu \rightarrow .5 \text{ MACO}_3 + .5 \text{ CH}_3\text{C}(\text{O}) + .5 \text{ HCHO} + .5 \text{ CO} + \text{HO}_2$                                                                                                                                                                          | $j_x(\text{ip\_MACR})$                                                  | Sander et al. (2014)                  |
| J44009  | TrGJC    | $\text{MACROOH} + h\nu \rightarrow \text{MACRO} + \text{OH}$                                                                                                                                                                                                                                                    | $j_x(\text{ip\_CH300H}) + 2.77 \cdot j_x(\text{ip\_HOCH}_2\text{CHO})$  | Sander et al. (2019)*                 |
| J44010  | TrGJC    | $\text{MACROH} + h\nu \rightarrow \text{CH}_3\text{COCH}_2\text{OH} + \text{CO} + \text{HO}_2 + \text{HO}_2$                                                                                                                                                                                                    | $2.77 \cdot j_x(\text{ip\_HOCH}_2\text{CHO})$                           | see note*                             |
| J44011  | TrGJC    | $\text{MACO}_3\text{H} + h\nu \rightarrow \text{MACO}_2 + \text{OH}$                                                                                                                                                                                                                                            | $j_x(\text{ip\_CH300H})$                                                | Sander et al. (2019)                  |
| J44012  | TrGJC    | $\text{LHMKABOOH} + h\nu \rightarrow .12 \text{ MGLYOX} + .12 \text{ HO}_2 + .88 \text{ CH}_3\text{C}(\text{O}) + .88 \text{ HOCH}_2\text{CHO} + .12 \text{ HCHO} + \text{OH}$                                                                                                                                  | $j_x(\text{ip\_CH300H}) + j\_ACETOL$                                    | Sander et al. (2019)                  |
| J44013  | TrGJC    | $\text{CO}_2\text{H}_3\text{CHO} + h\nu \rightarrow \text{MGLYOX} + \text{CO} + \text{HO}_2 + \text{HO}_2$                                                                                                                                                                                                      | $j_x(\text{ip\_HOCH}_2\text{CHO}) + j\_ACETOL$                          | Sander et al. (2019)                  |
| J44014  | TrGJC    | $\text{HO}_2\text{CO}_3\text{C}_4 + h\nu \rightarrow \text{CH}_3\text{C}(\text{O}) + \text{HOCH}_2\text{CHO} + \text{HO}_2$                                                                                                                                                                                     | $j\_ACETOL$                                                             | Rickard (2022)                        |
| J44015  | TrGJC    | $\text{BIACETOH} + h\nu \rightarrow \text{CH}_3\text{C}(\text{O}) + \text{HOCH}_2\text{CO}$                                                                                                                                                                                                                     | $2.15 \cdot j_x(\text{ip\_MGLYOX})$                                     | see note*                             |
| J44016  | TrGC     | $\text{HCOCCH}_3\text{CO} + h\nu \rightarrow .5 \text{ OH} + .5 \text{ CH}_3\text{CHO} + \text{CO} + .5 \text{ CH}_3\text{CHCO} + .5 \text{ CO}$                                                                                                                                                                | $j\_ketene$                                                             | Sander et al. (2019)                  |
| J44017a | TrGC     | $\text{CH}_3\text{COCHCO} + h\nu \rightarrow .0192 \text{ CH}_3\text{COCO}_2\text{H} + .1848 \text{ H}_2\text{O}_2 + .2208 \text{ MGLYOX} + .36 \text{ OH} + .36 \text{ CO} + .56 \text{ CH}_3\text{C}(\text{O}) + .2 \text{ CH}_3\text{CHO} + .2 \text{ CO}_2 + .2 \text{ HCHO} + .2 \text{ HO}_2 + \text{CO}$ | $j\_ketene \cdot 0.5$                                                   | Sander et al. (2019), Rickard (2022)* |
| J44017b | TrGC     | $\text{CH}_3\text{COCHCO} + h\nu \rightarrow \text{CH}_3\text{CHCO} + \text{CO}$                                                                                                                                                                                                                                | $j\_ketene \cdot 0.5$                                                   | Sander et al. (2019)                  |
| J44018a | TrGJC    | $\text{CH}_3\text{COCOCHO} + h\nu \rightarrow \text{CH}_3\text{C}(\text{O}) + 2 \text{ CO} + \text{HO}_2$                                                                                                                                                                                                       | $j_x(\text{ip\_MGLYOX})$                                                | Sander et al. (2019)                  |
| J44018b | TrGJC    | $\text{CH}_3\text{COCOCHO} + h\nu \rightarrow \text{HCOCO} + \text{CH}_3\text{C}(\text{O})$                                                                                                                                                                                                                     | $2.15 \cdot j_x(\text{ip\_MGLYOX})$                                     | Sander et al. (2019)                  |
| J44019  | TrGJC    | $\text{CH}_3\text{COCOCO}_2\text{H} + h\nu \rightarrow \text{CH}_3\text{C}(\text{O}) + \text{CO} + \text{CO}_2 + \text{HO}_2$                                                                                                                                                                                   | $3.15 \cdot j_x(\text{ip\_MGLYOX})$                                     | Sander et al. (2019)                  |
| J44020a | TrGJTerC | $\text{CH}_3\text{COCOCH}_2\text{OOH} + h\nu \rightarrow \text{CH}_3\text{C}(\text{O}) + \text{OH} + \text{HCHO} + \text{CO}$                                                                                                                                                                                   | $j_x(\text{ip\_CH300H}) + j\_ACETOL$                                    | Rickard (2022)                        |
| J44020b | TrGJTerC | $\text{CH}_3\text{COCOCH}_2\text{OOH} + h\nu \rightarrow \text{CH}_3\text{C}(\text{O}) + \text{HCOCO}$                                                                                                                                                                                                          | $2.15 \cdot j_x(\text{ip\_MGLYOX})$                                     | Rickard (2022)                        |
| J44021  | TrGJTerC | $\text{C44OOH} + h\nu \rightarrow \text{HCOCH}_2\text{CHO} + \text{CO}_2 + \text{HO}_2 + \text{OH}$                                                                                                                                                                                                             | $j_x(\text{ip\_CH300H})$                                                | Rickard (2022)                        |
| J44022  | TrGJTerC | $\text{C413COOOH} + h\nu \rightarrow \text{HCOCH}_2\text{CO}_3 + \text{HCHO} + \text{OH}$                                                                                                                                                                                                                       | $j_x(\text{ip\_CH300H}) + j_x(\text{ip\_HOCH}_2\text{CHO}) + j\_ACETOL$ | Rickard (2022)                        |

Table 2: Photolysis reactions (... continued)

| #       | labels   | reaction                                                                                                                                                                                                | rate coefficient                                                                                                                                                                                            | reference                                                                                            |
|---------|----------|---------------------------------------------------------------------------------------------------------------------------------------------------------------------------------------------------------|-------------------------------------------------------------------------------------------------------------------------------------------------------------------------------------------------------------|------------------------------------------------------------------------------------------------------|
| J44023a | TrGJTerC | $\text{C4CODIAL} + h\nu \rightarrow \text{HCOCOCH}_2\text{O}_2 + \text{HO}_2 + \text{CO}$                                                                                                               | $\text{jx}(\text{ip\_HOCH}_2\text{CHO})$                                                                                                                                                                    | Rickard (2022)                                                                                       |
| J44023b | TrGJTerC | $\text{C4CODIAL} + h\nu \rightarrow \text{HCOCH}_2\text{CO}_3 + \text{HO}_2 + \text{CO}$                                                                                                                | $\text{jx}(\text{ip\_MGLYOX})$                                                                                                                                                                              | Rickard (2022)                                                                                       |
| J44024  | TrGJTerC | $\text{C312COCO}_3\text{H} + h\nu \rightarrow \text{HCOCOCH}_2\text{O}_2 + \text{CO}_2 + \text{OH}$                                                                                                     | $\text{jx}(\text{ip\_CH300H}) + \text{jx}(\text{ip\_MGLYOX})$                                                                                                                                               | Rickard (2022)                                                                                       |
| J44025  | TrGJCN   | $\text{LMEKNO}_3 + h\nu \rightarrow .62 \text{ CH}_3\text{C}(\text{O}) + .62 \text{ CH}_3\text{CHO} + .38 \text{ HCHO}$<br>$+ .38 \text{ CO}_2 + .38 \text{ HOCH}_2\text{CH}_2\text{O}_2 + \text{NO}_2$ | $\text{jx}(\text{ip\_MEKNO}_3)$                                                                                                                                                                             | Barnes et al. (1993),<br>Sander et al. (2019)*                                                       |
| J44026  | TrGJCN   | $\text{MVKNO}_3 + h\nu \rightarrow \text{CH}_3\text{C}(\text{O}) + \text{HOCH}_2\text{CHO} + \text{NO}_2$                                                                                               | $\text{jx}(\text{ip\_MEKNO}_3)$                                                                                                                                                                             | Barnes et al. (1993),<br>Sander et al. (2019)*                                                       |
| J44027  | TrGJCN   | $\text{MACRNO}_3 + h\nu \rightarrow \text{CH}_3\text{COCH}_2\text{OH} + \text{CO} + \text{HO}_2 + \text{NO}_2$                                                                                          | $(2.84 * \text{j\_IC3H7NO}_3 + \text{jx}(\text{ip\_CH3CHO}))$<br>$* (\text{jx}(\text{ip\_MEKNO}_3) + 1\text{E-}10) / (\text{j\_}$<br>$\text{IC3H7NO}_3 + 0.42 * \text{jx}(\text{ip\_CHOH}) + 1\text{E-}10)$ | Müller et al. (2014),<br>Sander et al. (2019)*                                                       |
| J44028  | TrGJCN   | $\text{TC4H9NO}_3 + h\nu \rightarrow \text{CH}_3\text{COCH}_3 + \text{CH}_3 + \text{NO}_2$                                                                                                              | $2.84 * \text{j\_IC3H7NO}_3$                                                                                                                                                                                | Sander et al. (2019)                                                                                 |
| J44029  | TrGJC    | $\text{TC}_4\text{H}_9\text{OOH} + h\nu \rightarrow \text{CH}_3\text{COCH}_3 + \text{CH}_3 + \text{OH}$                                                                                                 | $\text{jx}(\text{ip\_CH300H})$                                                                                                                                                                              | Sander et al. (2019)                                                                                 |
| J44030  | TrGJCN   | $\text{IBUTOLBNO}_3 + h\nu \rightarrow \text{CH}_3\text{COCH}_3 + \text{HCHO} + \text{HO}_2 + \text{NO}_2$                                                                                              | $2.84 * \text{j\_IC3H7NO}_3$                                                                                                                                                                                | Sander et al. (2019)                                                                                 |
| J44031  | TrGJC    | $\text{IBUTOLBOOH} + h\nu \rightarrow \text{CH}_3\text{COCH}_3 + \text{HCHO} + \text{HO}_2 + \text{OH}$                                                                                                 | $\text{jx}(\text{ip\_CH300H})$                                                                                                                                                                              | Sander et al. (2019)                                                                                 |
| J44032  | TrGJC    | $\text{LBUT1ENOOH} + h\nu \rightarrow \text{C}_2\text{H}_5\text{CHO} + \text{HCHO} + \text{HO}_2 + \text{OH}$                                                                                           | $\text{jx}(\text{ip\_CH300H})$                                                                                                                                                                              | Sander et al. (2019)                                                                                 |
| J44033  | TrGJCN   | $\text{LBUT1ENNO}_3 + h\nu \rightarrow \text{C}_2\text{H}_5\text{CHO} + \text{HCHO} + \text{HO}_2 + \text{NO}_2$                                                                                        | $\text{j\_IC3H7NO}_3$                                                                                                                                                                                       | Sander et al. (2019)                                                                                 |
| J44034  | TrGJC    | $\text{BUT2OLOOH} + h\nu \rightarrow 2 \text{ CH}_3\text{CHO} + \text{HO}_2 + \text{OH}$                                                                                                                | $\text{jx}(\text{ip\_CH300H})$                                                                                                                                                                              | Sander et al. (2019)                                                                                 |
| J44035  | TrGJCN   | $\text{BUT2OLNO}_3 + h\nu \rightarrow 2 \text{ CH}_3\text{CHO} + \text{HO}_2 + \text{NO}_2$                                                                                                             | $\text{j\_IC3H7NO}_3$                                                                                                                                                                                       | Sander et al. (2019)                                                                                 |
| J44036  | TrGJC    | $\text{BUT2OLO} + h\nu \rightarrow \text{CH}_3\text{C}(\text{O}) + \text{HOCH}_2\text{CO}$                                                                                                              | $\text{j\_ACETOL}$                                                                                                                                                                                          | Sander et al. (2019)                                                                                 |
| J44037a | TrGJC    | $\text{C}_3\text{H}_7\text{CHO} + h\nu \rightarrow \text{C}_3\text{H}_7\text{O}_2 + \text{CO} + \text{HO}_2$                                                                                            | $\text{jx}(\text{ip\_C3H7CHO2HCO})$                                                                                                                                                                         | Sander et al. (2019)                                                                                 |
| J44037b | TrGJC    | $\text{C}_3\text{H}_7\text{CHO} + h\nu \rightarrow \text{C}_2\text{H}_4 + \text{CH}_2\text{CHOH}$                                                                                                       | $\text{jx}(\text{ip\_C3H7CHO2VINNY})$                                                                                                                                                                       | Sander et al. (2019)*                                                                                |
| J44038  | TrGJC    | $\text{IPRCHO} + h\nu \rightarrow \text{iC}_3\text{H}_7\text{O}_2 + \text{CO} + \text{HO}_2$                                                                                                            | $\text{jx}(\text{ip\_IPRCHO2HCO})$                                                                                                                                                                          | Sander et al. (2019)                                                                                 |
| J44039  | TrGJCN   | $\text{IC4H9NO}_3 + h\nu \rightarrow \text{IPRCHO} + \text{NO}_2$                                                                                                                                       | $\text{j\_IC3H7NO}_3$                                                                                                                                                                                       | Sander et al. (2019)                                                                                 |
| J44040  | TrGJC    | $\text{IC}_4\text{H}_9\text{OOH} + h\nu \rightarrow \text{IPRCHO} + \text{HO}_2 + \text{OH}$                                                                                                            | $\text{jx}(\text{ip\_CH300H})$                                                                                                                                                                              | Sander et al. (2019)                                                                                 |
| J44041  | TrGJC    | $\text{PERIBUACID} + h\nu \rightarrow \text{iC}_3\text{H}_7\text{O}_2 + \text{CO}_2 + \text{OH}$                                                                                                        | $\text{jx}(\text{ip\_CH300H})$                                                                                                                                                                              | Sander et al. (2019)                                                                                 |
| J44042  | TrGJCN   | $\text{PIPNO} + h\nu \rightarrow .7 \text{ IPRCO}_3 + .7 \text{ NO}_2 + .3 \text{ iC}_3\text{H}_7\text{O}_2 + .3 \text{ CO}_2 +$<br>$.3 \text{ NO}_3$                                                   | $\text{jx}(\text{ip\_PAN})$                                                                                                                                                                                 | Sander et al. (2019),<br>Sander et al. (2014)                                                        |
| J44043  | TrGJC    | $\text{HVMK} + h\nu \rightarrow \text{MGLYOX} + \text{CO} + 2 \text{ OH}$                                                                                                                               | $\text{jx}(\text{ip\_PeDIONE24})$                                                                                                                                                                           | Sander et al. (2019),<br>Nakanishi et al. (1977),<br>Messaadia et al. (2015),<br>Yoon et al. (1999)* |
| J44044  | TrGJC    | $\text{HMAC} + h\nu \rightarrow \text{HCOCCH}_3\text{CO} + 2 \text{ OH}$                                                                                                                                | $\text{jx}(\text{ip\_PeDIONE24})$                                                                                                                                                                           | Sander et al. (2019),<br>Nakanishi et al. (1977),<br>Messaadia et al. (2015),<br>Yoon et al. (1999)* |



Table 2: Photolysis reactions (... continued)

| #       | labels    | reaction                                                                                                                                         | rate coefficient                                                     | reference                                      |
|---------|-----------|--------------------------------------------------------------------------------------------------------------------------------------------------|----------------------------------------------------------------------|------------------------------------------------|
| J44045a | TrGJC     | $\text{CO}_2\text{C}_3\text{CHO} + h\nu \rightarrow \text{CH}_3\text{COCH}_2\text{O}_2 + \text{HO}_2 + \text{CO}$                                | $\text{jx}(\text{ip\_C2H5CHO2HCO})$                                  | Rickard (2022)                                 |
| J44045b | TrGJC     | $\text{CO}_2\text{C}_3\text{CHO} + h\nu \rightarrow \text{HVMK}$                                                                                 | $\text{jx}(\text{ip\_C2H5CHO2ENOL})$                                 | Andrews et al. (2012),<br>Sander et al. (2019) |
| J44046a | TrGJC     | $\text{IBUTDIAL} + h\nu \rightarrow \text{CH}_3\text{CHO} + \text{CO} + \text{HO}_2 + \text{CO}_2 + \text{H}_2\text{O}$                          | $\text{jx}(\text{ip\_C2H5CHO2HCO})*2.$                               | see note*                                      |
| J44046b | TrGJC     | $\text{IBUTDIAL} + h\nu \rightarrow \text{HMAC}$                                                                                                 | $\text{jx}(\text{ip\_C2H5CHO2ENOL})*2.$                              | Andrews et al. (2012),<br>Sander et al. (2019) |
| J44200  | TrGJTerC  | $\text{IBUTALOH} + h\nu \rightarrow \text{CH}_3\text{COCH}_3 + \text{HO}_2 + \text{HO}_2 + \text{CO}$                                            | $\text{j\_ACETOL}$                                                   | Rickard (2022)                                 |
| J44201  | TrGJTerC  | $\text{IPRHOCO}_3\text{H} + h\nu \rightarrow \text{CH}_3\text{COCH}_3 + \text{HO}_2 + \text{CO}_2 + \text{OH}$                                   | $\text{jx}(\text{ip\_CH300H})$                                       | Rickard (2022)                                 |
| J44400a | TrGJAroC  | $\text{MALDIALOOH} + h\nu \rightarrow \text{C}_3\text{OH13CO} + \text{CO} + \text{OH} + \text{HO}_2$                                             | $\text{jx}(\text{ip\_HOCH2CHO})*2.$                                  | Rickard (2022)                                 |
| J44400b | TrGJAroC  | $\text{MALDIALOOH} + h\nu \rightarrow \text{GLYOX} + \text{GLYOX} + \text{HO}_2 + \text{OH}$                                                     | $\text{jx}(\text{ip\_CH300H})$                                       | Rickard (2022)*                                |
| J44401  | TrGJAroC  | $\text{BZFUOOH} + h\nu \rightarrow \text{CO14O}_3\text{CHO} + \text{HO}_2 + \text{OH}$                                                           | $\text{jx}(\text{ip\_CH300H})$                                       | Rickard (2022)*                                |
| J44402  | TrGJAroC  | $\text{HOCOC4DIAL} + h\nu \rightarrow \text{HCOCO}_3\text{H} + \text{HO}_2 + \text{CO}$                                                          | $\text{jx}(\text{ip\_MGLYOX}) + \text{jx}(\text{ip\_HOCH2CHO})$      | Rickard (2022)                                 |
| J44403  | TrGJAroCN | $\text{NBZFUOOH} + h\nu \rightarrow .5 \text{ CO14O}_3\text{CHO} + .5 \text{ NO}_2 + .5 \text{ NBZFUONE} + .5 \text{ HO}_2 + \text{OH}$          | $\text{jx}(\text{ip\_CH300H})$                                       | Rickard (2022)*                                |
| J44404a | TrGJAroC  | $\text{MALDALCO}_3\text{H} + h\nu \rightarrow \text{HCOCO}_3\text{H} + \text{HO}_2 + \text{CO} + \text{HO}_2 + \text{CO}$                        | $\text{jx}(\text{ip\_MACR})$                                         | Rickard (2022)                                 |
| J44404b | TrGJAroC  | $\text{MALDALCO}_3\text{H} + h\nu \rightarrow .6 \text{ MALANHY} + \text{HO}_2 + .4 \text{ GLYOX} + .4 \text{ CO} + .4 \text{ CO}_2 + \text{OH}$ | $\text{jx}(\text{ip\_CH300H})$                                       | Rickard (2022)*                                |
| J44405  | TrGJAroC  | $\text{EPXDLCO}_2\text{H} + h\nu \rightarrow \text{C3DIALO}_2 + \text{CO}_2 + \text{HO}_2$                                                       | $2.77*\text{jx}(\text{ip\_HOCH2CHO})$                                | Rickard (2022)                                 |
| J44406  | TrGJAroC  | $\text{MALDIAL} + h\nu \rightarrow .4 \text{ BZFUONE} + .6 \text{ MALDIALCO}_3 + .6 \text{ HO}_2$                                                | $\text{jx}(\text{ip\_NO}_2)*0.14$                                    | Rickard (2022)                                 |
| J44407  | TrGJAroC  | $\text{MALANHYOOH} + h\nu \rightarrow \text{HCOCO}_3\text{H} + \text{CO}_2 + \text{OH}$                                                          | $\text{jx}(\text{ip\_CH300H})$                                       | Rickard (2022)*                                |
| J44408  | TrGJAroC  | $\text{EPXDLCO}_3\text{H} + h\nu \rightarrow \text{C3DIALO}_2 + \text{OH} + \text{CO}_2$                                                         | $\text{jx}(\text{ip\_CH300H}) + 2.77*\text{jx}(\text{ip\_HOCH2CHO})$ | Rickard (2022)                                 |
| J44409  | TrGJAroC  | $\text{CO}_2\text{C}_4\text{DIAL} + h\nu \rightarrow \text{CO} + \text{CO} + \text{HO}_2 + \text{HO}_2 + \text{CO} + \text{CO}$                  | $\text{jx}(\text{ip\_MGLYOX})*2.$                                    | Rickard (2022)                                 |
| J44410  | TrGJAroC  | $\text{MALDALCO}_2\text{H} + h\nu \rightarrow \text{HCOCO}_2\text{H} + \text{HO}_2 + \text{CO} + \text{HO}_2 + \text{CO}$                        | $\text{jx}(\text{ip\_MACR})$                                         | Rickard (2022)                                 |
| J44411  | TrGJAroC  | $\text{EPXC4DIAL} + h\nu \rightarrow \text{C3DIALO}_2 + \text{CO} + \text{HO}_2$                                                                 | $2.77*\text{jx}(\text{ip\_HOCH2CHO})*2.$                             | Rickard (2022)                                 |
| J44412  | TrGJAroC  | $\text{CO14O}_3\text{CHO} + h\nu \rightarrow \text{HO}_2 + \text{CO} + \text{HCOCH}_2\text{O}_2 + \text{CO}_2$                                   | $\text{jx}(\text{ip\_MGLYOX})$                                       | Rickard (2022)                                 |
| J44414  | TrGJAroC  | $\text{MECOACEOOH} + h\nu \rightarrow \text{CH}_3\text{C(O)} + \text{HCHO} + \text{CO}_2 + \text{OH}$                                            | $\text{jx}(\text{ip\_CH300H})$                                       | Rickard (2022)*                                |
| J45002  | TrGJC     | $\text{LISOPACOOH} + h\nu \rightarrow \text{LISOPACO} + \text{OH}$                                                                               | $\text{jx}(\text{ip\_CH300H})$                                       | Rickard (2022)                                 |
| J45003  | TrGJCN    | $\text{LISOPACNO}_3 + h\nu \rightarrow \text{LISOPACO} + \text{NO}_2$                                                                            | $0.59*\text{j\_IC3H7NO}_3$                                           | see note*                                      |
| J45004  | TrGJC     | $\text{ISOPBOOH} + h\nu \rightarrow \text{MVK} + \text{HCHO} + \text{HO}_2 + \text{OH}$                                                          | $\text{jx}(\text{ip\_CH300H})$                                       | Rickard (2022)                                 |
| J45005  | TrGJCN    | $\text{ISOPBNO}_3 + h\nu \rightarrow \text{MVK} + \text{HCHO} + \text{HO}_2 + \text{NO}_2$                                                       | $2.84*\text{j\_IC3H7NO}_3$                                           | see note*                                      |
| J45006  | TrGJC     | $\text{ISOPDOOH} + h\nu \rightarrow \text{MACR} + \text{HCHO} + \text{HO}_2 + \text{OH}$                                                         | $\text{jx}(\text{ip\_CH300H})$                                       | Rickard (2022)                                 |
| J45007  | TrGJCN    | $\text{ISOPDNO}_3 + h\nu \rightarrow \text{MACR} + \text{HCHO} + \text{HO}_2 + \text{NO}_2$                                                      | $\text{j\_IC3H7NO}_3$                                                | see note*                                      |
| J45008  | TrGJCN    | $\text{NISOPOOH} + h\nu \rightarrow \text{NC}_4\text{CHO} + \text{HO}_2 + \text{OH}$                                                             | $\text{jx}(\text{ip\_CH300H})$                                       | Rickard (2022)                                 |

Table 2: Photolysis reactions (... continued)

| #       | labels    | reaction                                                                                                                                                                        | rate coefficient                                                                                    | reference                                                               |
|---------|-----------|---------------------------------------------------------------------------------------------------------------------------------------------------------------------------------|-----------------------------------------------------------------------------------------------------|-------------------------------------------------------------------------|
| J45009  | TrGJCN    | $\text{NC4CHO} + h\nu \rightarrow \text{LHC4ACCO3} + \text{NO}_2$                                                                                                               | $(.59*j\_IC3H7N03+jx(ip\_MACR))$<br>$*(jx(ip\_MEKN03)+1E-10)/(j\_IC3H7N03+0.42*jx(ip\_CHOH)+1E-10)$ | Müller et al. (2014),<br>Sander et al. (2019)*                          |
| J45010  | TrGJCN    | $\text{LNISOOH} + h\nu \rightarrow \text{NOA} + \text{OH} + .5 \text{HOCHCHO} + .5 \text{CO} + .5 \text{HO}_2 + .5 \text{CO}_2$                                                 | $jx(ip\_CH300H)$                                                                                    | Taraborrelli et al. (2009),<br>Sander et al. (2019)                     |
| J45011  | TrGJC     | $\text{LHC4ACCHO} + h\nu \rightarrow .5 \text{LHC4ACCO3} + .5 \text{HO}_2 + .5 \text{CO} + .5 \text{OH} + .25 \text{MACRO2} + .25 \text{LHMKABO2}$                              | $jx(ip\_MACR)$                                                                                      | Sander et al. (2019)                                                    |
| J45012  | TrGJC     | $\text{LC578OOH} + h\nu \rightarrow .25 \text{CH}_3\text{COCH}_2\text{OH} + .75 \text{MGLYOX} + .25 \text{HOCHCHO} + .75 \text{HOCH}_2\text{CHO} + .75 \text{HO}_2 + \text{OH}$ | $jx(ip\_CH300H)+ 2.77*jx(ip\_HOCH2CHO)$                                                             | Sander et al. (2019)                                                    |
| J45013  | TrGJC     | $\text{LHC4ACCO3H} + h\nu \rightarrow \text{OH} + .5 \text{MACRO2} + .5 \text{LHMKABO2} + \text{OH} + \text{CO}_2$                                                              | $j\_HPALD$                                                                                          | Sander et al. (2019)                                                    |
| J45014  | TrGJCN    | $\text{LC5PAN1719} + h\nu \rightarrow .7 \text{LHC4ACCO3} + .7 \text{NO}_2 + .15 \text{MACRO2} + .15 \text{LHMKABO2} + .3 \text{CO}_2 + .3 \text{NO}_3$                         | $jx(ip\_PAN)$                                                                                       | Sander et al. (2019)                                                    |
| J45015  | TrGJC     | $\text{HCOC5} + h\nu \rightarrow .65 \text{CH}_3 + .65 \text{CO} + .65 \text{HCHO} + .35 \text{OH} + .35 \text{CH}_3\text{COCH}_2\text{O}_2 + \text{HOCH}_2\text{CO}$           | $0.5*jx(ip\_MVK)$                                                                                   | Sander et al. (2019)*                                                   |
| J45016  | TrGJC     | $\text{C59OOH} + h\nu \rightarrow \text{CH}_3\text{COCH}_2\text{OH} + \text{HOCH}_2\text{CO} + \text{OH}$                                                                       | $j\_ACETOL+jx(ip\_CH300H)$                                                                          | Sander et al. (2019)                                                    |
| J45017  | TrGJTerC  | $\text{C511OOH} + h\nu \rightarrow \text{CH}_3\text{C(O)} + \text{HCOCH}_2\text{CHO} + \text{OH}$                                                                               | $jx(ip\_CH300H)+jx(ip\_HOCH2CHO)$                                                                   | Rickard (2022)                                                          |
| J45018a | TrGJTerC  | $\text{CO23C4CHO} + h\nu \rightarrow \text{CH}_3\text{COCOCH}_2\text{O}_2 + \text{HO}_2 + \text{CO}$                                                                            | $jx(ip\_HOCH2CHO)$                                                                                  | Rickard (2022)                                                          |
| J45018b | TrGJTerC  | $\text{CO23C4CHO} + h\nu \rightarrow \text{CH}_3\text{C(O)} + \text{HCOCH}_2\text{CO}_3$                                                                                        | $2.15*jx(ip\_MGLYOX)$                                                                               | Rickard (2022)                                                          |
| J45019  | TrGJTerC  | $\text{CO23C4CO3H} + h\nu \rightarrow \text{CH}_3\text{COCOCH}_2\text{O}_2 + \text{CO}_2 + \text{OH}$                                                                           | $jx(ip\_CH300H)+jx(ip\_HOCH2CHO)$                                                                   | Rickard (2022)                                                          |
| J45020  | TrGJTerC  | $\text{C512OOH} + h\nu \rightarrow \text{C513O}_2 + \text{OH}$                                                                                                                  | $jx(ip\_CH300H)+jx(ip\_HOCH2CHO)$                                                                   | Rickard (2022)                                                          |
| J45021  | TrGJTerC  | $\text{CO13C4CHO} + h\nu \rightarrow \text{CHOC3COO}_2 + \text{CO} + \text{HO}_2$                                                                                               | $jx(ip\_HOCH2CHO)*2.$                                                                               | Rickard (2022)                                                          |
| J45022  | TrGJTerC  | $\text{C513OOH} + h\nu \rightarrow \text{GLYOX} + \text{HOC}_2\text{H}_4\text{CO}_3 + \text{OH}$                                                                                | $jx(ip\_CH300H)+jx(ip\_HOCH2CHO)$                                                                   | Rickard (2022)                                                          |
| J45023  | TrGJTerC  | $\text{C513CO} + h\nu \rightarrow \text{HOC}_2\text{H}_4\text{CO}_3 + \text{HO}_2 + \text{CO} + \text{CO}$                                                                      | $jx(ip\_MGLYOX)+2.15*jx(ip\_MGLYOX)$                                                                | Rickard (2022)                                                          |
| J45024  | TrGJTerC  | $\text{C514OOH} + h\nu \rightarrow \text{CO13C4CHO} + \text{HO}_2 + \text{OH}$                                                                                                  | $jx(ip\_CH300H)+jx(ip\_HOCH2CHO)*2.$                                                                | Rickard (2022)                                                          |
| J45025  | TrGJTerCN | $\text{C514NO}_3 + h\nu \rightarrow \text{CO13C4CHO} + \text{HO}_2 + \text{NO}_2$                                                                                               | $j\_IC3H7N03+jx(ip\_HOCH2CHO)*2.$                                                                   | Rickard (2022)                                                          |
| J45026a | TrGJC     | $\text{LZCODC23DBCOOH} + h\nu \rightarrow \text{OH} + \text{CO} + \text{HVMK} + \text{OH}$                                                                                      | $j\_HPALD*0.6*0.5$                                                                                  | Sander et al. (2019),<br>Jenkin et al. (2015),<br>Peeters et al. (2014) |
| J45026b | TrGJC     | $\text{LZCODC23DBCOOH} + h\nu \rightarrow \text{OH} + \text{CO} + \text{CH}_3\text{C(O)} + \text{HOCH}_2\text{CHO}$                                                             | $j\_HPALD*0.6*0.5$                                                                                  | Sander et al. (2019),<br>Jenkin et al. (2015),<br>Peeters et al. (2014) |
| J45026c | TrGJC     | $\text{LZCODC23DBCOOH} + h\nu \rightarrow \text{OH} + \text{CO} + \text{HMAC} + \text{OH}$                                                                                      | $j\_HPALD*0.4*0.5$                                                                                  | Sander et al. (2019),<br>Jenkin et al. (2015),<br>Peeters et al. (2014) |

Table 2: Photolysis reactions (... continued)

| #       | labels    | reaction                                                                                                                                                                | rate coefficient                                                     | reference                                                               |
|---------|-----------|-------------------------------------------------------------------------------------------------------------------------------------------------------------------------|----------------------------------------------------------------------|-------------------------------------------------------------------------|
| J45026d | TrGJC     | $\text{LZCODC23DBCOOH} + h\nu \rightarrow \text{OH} + \text{CO} + \text{CO} + \text{CH}_3\text{COCH}_2\text{OH} + \text{HO}_2$                                          | $j_{\text{-HPALD}}*0.4*0.5$                                          | Sander et al. (2019),<br>Jenkin et al. (2015),<br>Peeters et al. (2014) |
| J45027  | TrGJC     | $\text{LZCO3HC23DBCOD} + h\nu \rightarrow .62 \text{EZCH3CO2CHCHO} + .38 \text{EZCHOCCH3CHO2} + \text{OH} + \text{CO}_2$                                                | $j_{\text{-HPALD}}$                                                  | Sander et al. (2019)                                                    |
| J45028a | TrGJC     | $\text{C1OOHC2OOHC4OD} + h\nu \rightarrow \text{CH}_3\text{COCH}_2\text{O}_2\text{H} + \text{OH} + 2 \text{CO} + \text{HO}_2$                                           | $2.77*jx(ip_{\text{HOCH2CHO}})$                                      | Sander et al. (2019)                                                    |
| J45028b | TrGJC     | $\text{C1OOHC2OOHC4OD} + h\nu \rightarrow .5 \text{CH}_3\text{COCH}_2\text{O}_2\text{H} + .5 \text{HOCHCHO} + .5 \text{CO2H3CHO} + .5 \text{HCHO} + 1.5 \text{OH}$      | $2.*jx(ip_{\text{CH300H}})$                                          | Sander et al. (2019)                                                    |
| J45029  | TrGC      | $\text{DB1OOH} + h\nu \rightarrow \text{DB1O2} + \text{OH}$                                                                                                             | $jx(ip_{\text{CH300H}})$                                             | Sander et al. (2019)                                                    |
| J45030  | TrGC      | $\text{DB2OOH} + h\nu \rightarrow .48 \text{CH}_3\text{COCH}_2\text{OH} + .52 \text{HOCH}_2\text{CHO} + .52 \text{MGLYOX} + .48 \text{GLYOX} + \text{HO}_2 + \text{OH}$ | $jx(ip_{\text{CH300H}})$                                             | Sander et al. (2019)                                                    |
| J45031a | TrGJC     | $\text{C1ODC2OOHC4OD} + h\nu \rightarrow \text{MGLYOX} + \text{HOCHCHO} + \text{OH}$                                                                                    | $jx(ip_{\text{CH300H}})$                                             | Sander et al. (2019)                                                    |
| J45031b | TrGJC     | $\text{C1ODC2OOHC4OD} + h\nu \rightarrow \text{CO2H3CHO} + \text{CO} + \text{HO}_2 + \text{OH}$                                                                         | $2.*2.77*jx(ip_{\text{HOCH2CHO}})$                                   | Sander et al. (2019)                                                    |
| J45032  | TrGJC     | $\text{C4MDIAL} + h\nu \rightarrow .5 \text{CH}_3\text{COCHCO} + .5 \text{HCOCCH}_3\text{CO} + \text{CO} + \text{HO}_2 + \text{OH}$                                     | $jx(ip_{\text{N02}})*0.1*0.5$                                        | Sander et al. (2019)*                                                   |
| J45033  | TrGCN     | $\text{DB1NO3} + h\nu \rightarrow \text{DB1O2} + \text{NO}_2$                                                                                                           | $j_{\text{-IC3H7N03}}$                                               | Sander et al. (2019)                                                    |
| J45034  | TrGJTerC  | $\text{CHOC3COOOH} + h\nu \rightarrow \text{CHOC3COO2} + \text{CO}_2 + \text{OH}$                                                                                       | $jx(ip_{\text{CH300H}})+jx(ip_{\text{HOCH2CHO}})+j_{\text{-ACETOL}}$ | Rickard (2022)                                                          |
| J45200a | TrGJTerC  | $\text{LMBOABOOH} + h\nu \rightarrow \text{HOCH}_2\text{CHO} + \text{CH}_3\text{COCH}_3 + \text{HO}_2 + \text{OH}$                                                      | $jx(ip_{\text{CH300H}})*.67$                                         | Rickard (2022), Sander et al. (2019)                                    |
| J45200b | TrGJTerC  | $\text{LMBOABOOH} + h\nu \rightarrow \text{IBUTALOH} + \text{HCHO} + \text{HO}_2 + \text{OH}$                                                                           | $jx(ip_{\text{CH300H}})*.33$                                         | Rickard (2022), Sander et al. (2019)                                    |
| J45201  | TrGJTerC  | $\text{MBOACO} + h\nu \rightarrow \text{HCHO} + \text{HO}_2 + \text{IPRHOCO3}$                                                                                          | $j_{\text{-ACETOL}}$                                                 | Rickard (2022)                                                          |
| J45202  | TrGJTerC  | $\text{MBOCOCO} + h\nu \rightarrow \text{CO} + \text{HO}_2 + \text{IPRHOCO3}$                                                                                           | $jx(ip_{\text{MGLYOX}})$                                             | Rickard (2022)                                                          |
| J45203a | TrGJTerCN | $\text{LNMBOABOOH} + h\nu \rightarrow \text{NO}_3\text{CH}_2\text{CHO} + \text{CH}_3\text{COCH}_3 + \text{HO}_2 + \text{OH}$                                            | $jx(ip_{\text{CH300H}})*.65$                                         | Rickard (2022), Sander et al. (2019)                                    |
| J45203b | TrGJTerCN | $\text{LNMBOABOOH} + h\nu \rightarrow \text{IBUTALOH} + \text{HCHO} + \text{NO}_2 + \text{OH}$                                                                          | $jx(ip_{\text{CH300H}})*.35$                                         | Rickard (2022), Sander et al. (2019)                                    |
| J45204  | TrGJTerCN | $\text{NC4OHCO3H} + h\nu \rightarrow \text{IBUTALOH} + \text{CO}_2 + \text{NO}_2 + \text{OH}$                                                                           | $jx(ip_{\text{CH300H}})$                                             | Rickard (2022)                                                          |
| J45400  | TrGJAroC  | $\text{C54CO} + h\nu \rightarrow \text{HO}_2 + \text{CO} + \text{CO} + \text{CO} + \text{CH}_3\text{C(O)}$                                                              | $jx(ip_{\text{MGLYOX}})+2.15*jx(ip_{\text{MGLYOX}})*2.$              | Rickard (2022)                                                          |
| J45401  | TrGJAroC  | $\text{C5134CO2OH} + h\nu \rightarrow \text{CH}_3\text{COCOCHO} + \text{HO}_2 + \text{CO} + \text{HO}_2$                                                                | $jx(ip_{\text{HOCH2CHO}})+2.15*jx(ip_{\text{MGLYOX}})$               | Rickard (2022)                                                          |
| J45402  | TrGJAroC  | $\text{C5DIALOOH} + h\nu \rightarrow \text{MALDIAL} + \text{CO} + \text{HO}_2 + \text{OH}$                                                                              | $jx(ip_{\text{CH300H}})+jx(ip_{\text{MACR}})$                        | Rickard (2022)*                                                         |

Table 2: Photolysis reactions (... continued)

| #      | labels    | reaction                                                                                                   | rate coefficient                              | reference           |
|--------|-----------|------------------------------------------------------------------------------------------------------------|-----------------------------------------------|---------------------|
| J45406 | TrGJAroC  | $C_5CO_{14}OH + h\nu \rightarrow CH_3C(O) + HCOCO_2H + HO_2 + CO$                                          | $jx(ip\_MVK)$                                 | Rickard (2022)      |
| J45407 | TrGJAroC  | $C_5DICARB + h\nu \rightarrow .6 C_5CO_{14}O_2 + .6 HO_2 + .4 TLFUONE$                                     | $jx(ip\_N02)*0.2$                             | Rickard (2022)*     |
| J45408 | TrGJAroC  | $MC_3ODBCO_2H + h\nu \rightarrow CH_3COCO_2H + HO_2 + CO + HO_2 + CO$                                      | $jx(ip\_MACR)$                                | Rickard (2022)      |
| J45409 | TrGJAroC  | $ACCOMMECHO + h\nu \rightarrow MECOACETO_2 + HO_2 + CO$                                                    | $jx(ip\_HOCH_2CHO)$                           | Rickard (2022)      |
| J45410 | TrGJAroC  | $MMALNH_2OOH + h\nu \rightarrow CO_2H_3CO_3 + CO_2 + OH$                                                   | $jx(ip\_CH_3OOH)$                             | Rickard (2022)*     |
| J45411 | TrGJAroC  | $C_5DICAROOH + h\nu \rightarrow MGLYOX + GLYOX + HO_2 + OH$                                                | $jx(ip\_CH_3OOH)+jx(ip\_HOCH_2CHO)+j\_ACETOL$ | Rickard (2022)*     |
| J45412 | TrGJAroCN | $NTLFUOOH + h\nu \rightarrow ACCOMECHO + NO_2 + OH$                                                        | $jx(ip\_CH_3OOH)$                             | Rickard (2022)*     |
| J45414 | TrGJAroC  | $C_5CO_{14}OOH + h\nu \rightarrow .83 MALANHY + .83 CH_3 + .17 MGLYOX + .17 HO_2 + .17 CO + .17 CO_2 + OH$ | $jx(ip\_CH_3OOH)$                             | Rickard (2022)*     |
| J45415 | TrGJAroC  | $TLFUOOH + h\nu \rightarrow ACCOMECHO + HO_2 + OH$                                                         | $jx(ip\_CH_3OOH)$                             | Rickard (2022)*     |
| J45417 | TrGJAroC  | $ACCOMMECO_3H + h\nu \rightarrow MECOACETO_2 + CO_2 + OH$                                                  | $jx(ip\_CH_3OOH)$                             | Rickard (2022)      |
| J45418 | TrGJAroC  | $C_5DIALCO + h\nu \rightarrow MALDIALCO_3 + CO + HO_2$                                                     | $jx(ip\_MGLYOX)+jx(ip\_MACR)$                 | Rickard (2022)      |
| J46200 | TrGJTerCN | $C_6_{14}NO_3 + h\nu \rightarrow CO_2C_4CHO + HCHO + HO_2 + NO_2$                                          | $2.15*jx(ip\_MGLYOX)$                         | Rickard (2022)      |
| J46201 | TrGJTerC  | $C_6_{14}OOH + h\nu \rightarrow CO_2C_4CHO + HCHO + HO_2 + OH$                                             | $jx(ip\_CH_3OOH)+2.15*jx(ip\_MGLYOX)$         | Rickard (2022)      |
| J46202 | TrGJTerC  | $CO_2C_5CHO + h\nu \rightarrow CO_2C_4CO_3 + CO + HO_2$                                                    | $jx(ip\_MGLYOX)$                              | Rickard (2022)      |
| J46203 | TrGJTerC  | $CO_2C_5COOH + h\nu \rightarrow CO_2C_4CO_3 + HCHO + OH$                                                   | $jx(ip\_CH_3OOH)+2.15*jx(ip\_MGLYOX)$         | Rickard (2022)      |
| J46400 | TrGJAroC  | $PHENOOH + h\nu \rightarrow .71 MALDALCO_2H + .71 GLYOX + .29 PBZQONE + HO_2 + OH$                         | $jx(ip\_CH_3OOH)$                             | Rickard (2022)*     |
| J46401 | TrGJAroC  | $C_6CO_4DB + h\nu \rightarrow C_4CO_2DBC_3 + HO_2 + CO$                                                    | $jx(ip\_MGLYOX)*2.$                           | Rickard (2022)      |
| J46402 | TrGJAroC  | $C_5CO_2DCO_3H + h\nu \rightarrow CH_3C(O) + HCOCOCHO + CO_2 + OH$                                         | $jx(ip\_CH_3OOH)+jx(ip\_MGLYOX)$              | Rickard (2022)      |
| J46403 | TrGJAroCN | $NDNPHENOOH + h\nu \rightarrow NC_4DCO_2H + HNO_3 + CO + CO + NO_2 + OH$                                   | $jx(ip\_CH_3OOH)$                             | Rickard (2022)*     |
| J46404 | TrGJAroCN | $BZBIPERNO_3 + h\nu \rightarrow GLYOX + HO_2 + .5 BZFUONE + .5 BZFUONE + NO_2$                             | $j\_IC_3H_7NO_3$                              | Rickard (2022)*     |
| J46405 | TrGJAroCN | $HOC_6H_4NO_2 + h\nu \rightarrow HONO + CPDKETENE$                                                         | $jx(ip\_HOC_6H_4NO_2)$                        | Chen et al. (2011)* |
| J46406 | TrGJAroC  | $CPDKETENE + h\nu \rightarrow CO_2 + CO + 2 HO_2 + MALDIAL$                                                | $j\_ketene$                                   | see note*           |
| J46407 | TrGJAroC  | $C_5COOHCO_3H + h\nu \rightarrow HOCOC_4DIAL + HO_2 + CO + CO_2 + OH$                                      | $jx(ip\_CH_3OOH)$                             | Rickard (2022)      |
| J46408 | TrGJAroC  | $BZEPOXMUC + h\nu \rightarrow .5 C_5DIALO_2 + 1.5 HO_2 + 1.5 CO + .5 MALDIAL$                              | $4.E3*jx(ip\_MVK)*0.1$                        | Rickard (2022)      |
| J46409 | TrGJAroCN | $NPHEN_1OOH + h\nu \rightarrow NPHEN_1O + OH$                                                              | $jx(ip\_CH_3OOH)$                             | Rickard (2022)      |
| J46410 | TrGJAroC  | $BZEMUCCO + h\nu \rightarrow HCOCOHC_3 + C_3DIALO_2$                                                       | $jx(ip\_HOCH_2CHO)*2.+j\_ACETOL$              | Rickard (2022)      |
| J46411 | TrGJAroC  | $BZEMUCCO_2H + h\nu \rightarrow C_5DIALO_2 + CO_2 + HO_2$                                                  | $jx(ip\_MACR)$                                | Rickard (2022)      |

Table 2: Photolysis reactions (... continued)

| #      | labels    | reaction                                                                                                                                                                                                        | rate coefficient                                                     | reference                |
|--------|-----------|-----------------------------------------------------------------------------------------------------------------------------------------------------------------------------------------------------------------|----------------------------------------------------------------------|--------------------------|
| J46412 | TrGJAroCN | $\text{NNCATECOOH} + h\nu \rightarrow \text{NC4DCO2H} + \text{HCOCO}_2\text{H} + \text{NO}_2 + \text{OH}$                                                                                                       | $\text{jx}(\text{ip\_CH300H})$                                       | Rickard (2022)*          |
| J46413 | TrGJAroC  | $\text{C615CO2OOH} + h\nu \rightarrow \text{C5DICARB} + \text{CO} + \text{HO}_2 + \text{OH}$                                                                                                                    | $\text{jx}(\text{ip\_MVK}) + \text{jx}(\text{ip\_CH300H})$           | Rickard (2022)           |
| J46414 | TrGJAroCN | $\text{NPHENO OH} + h\nu \rightarrow \text{MALDALCO2H} + \text{GLYOX} + \text{OH} + \text{NO}_2$                                                                                                                | $\text{j\_IC3H7N03} + \text{jx}(\text{ip\_CH300H})$                  | Rickard (2022)           |
| J46415 | TrGJAroCN | $\text{NCATECOOH} + h\nu \rightarrow \text{NC4DCO2H} + \text{HCOCO}_2\text{H} + \text{HO}_2 + \text{OH}$                                                                                                        | $\text{jx}(\text{ip\_CH300H})$                                       | Rickard (2022)*          |
| J46416 | TrGJAroC  | $\text{PBZQOOH} + h\nu \rightarrow \text{C5CO2OHCO3} + \text{OH}$                                                                                                                                               | $\text{jx}(\text{ip\_CH300H})$                                       | Rickard (2022)*          |
| J46417 | TrGJAroC  | $\text{BZOBIPEROH} + h\nu \rightarrow \text{MALDIALCO3} + \text{GLYOX} + \text{HO}_2$                                                                                                                           | $\text{j\_ACETOL}$                                                   | Rickard (2022)           |
| J46418 | TrGJAroC  | $\text{BZBIPEROOH} + h\nu \rightarrow \text{GLYOX} + \text{HO}_2 + .5 \text{ BZFUONE} + .5 \text{ BZFUONE} + \text{OH}$                                                                                         | $\text{jx}(\text{ip\_CH300H})$                                       | Rickard (2022)*          |
| J46419 | TrGJAroCN | $\text{NBZQOOH} + h\nu \rightarrow \text{C6CO4DB} + \text{NO}_2 + \text{OH}$                                                                                                                                    | $\text{jx}(\text{ip\_CH300H})$                                       | Rickard (2022)*          |
| J46420 | TrGJAroC  | $\text{CATEC1OOH} + h\nu \rightarrow \text{CATEC1O} + \text{OH}$                                                                                                                                                | $\text{jx}(\text{ip\_CH300H})$                                       | Rickard (2022)           |
| J46421 | TrGJAroC  | $\text{C6125CO} + h\nu \rightarrow \text{C5CO14O2} + \text{CO} + \text{HO}_2$                                                                                                                                   | $\text{jx}(\text{ip\_MGLYOX}) + \text{jx}(\text{ip\_MVK})$           | Rickard (2022)           |
| J46422 | TrGJAroCN | $\text{DNPHENO OH} + h\nu \rightarrow \text{NC4DCO2H} + \text{HCOCO}_2\text{H} + \text{NO}_2 + \text{OH}$                                                                                                       | $\text{jx}(\text{ip\_CH300H})$                                       | Rickard (2022)*          |
| J46423 | TrGJAroC  | $\text{BZEMUCCO3H} + h\nu \rightarrow \text{C5DIALO2} + \text{CO}_2 + \text{OH}$                                                                                                                                | $\text{jx}(\text{ip\_CH300H}) + \text{jx}(\text{ip\_MACR})$          | Rickard (2022)           |
| J46424 | TrGJAroC  | $\text{C6H5OOH} + h\nu \rightarrow \text{C6H5O} + \text{OH}$                                                                                                                                                    | $\text{jx}(\text{ip\_CH300H})$                                       | Rickard (2022)           |
| J46425 | TrGJAroC  | $\text{BZEMUCOOH} + h\nu \rightarrow .5 \text{ EPXC4DIAL} + .5 \text{ GLYOX} + .5 \text{ HO}_2 + .5 \text{ C3DIALO2} + .5 \text{ C32OH13CO} + \text{OH}$                                                        | $\text{jx}(\text{ip\_CH300H}) + \text{jx}(\text{ip\_HOCH2CHO}) * 2.$ | Rickard (2022)*          |
| J46427 | TrGJAroCN | $\text{BZEMUCNO3} + h\nu \rightarrow \text{EPXC4DIAL} + \text{NO}_2 + \text{GLYOX} + \text{HO}_2$                                                                                                               | $2.77 * \text{jx}(\text{ip\_HOCH2CHO})$                              | Rickard (2022)           |
| J46428 | TrGJAroCN | $\text{DNPHEN} + h\nu \rightarrow \text{HONO} + \text{NCPDKETENE}$                                                                                                                                              | $\text{jx}(\text{ip\_HOC6H4N02})$                                    | Sander et al. (2019)     |
| J46429 | TrGJAroCN | $\text{NCPDKETENE} + h\nu \rightarrow \text{CO}_2 + \text{CO} + 2 \text{ HO}_2 + \text{NC4DCO2H}$                                                                                                               | $\text{j\_ketene}$                                                   | see note*                |
| J47200 | TrGJTerC  | $\text{CO235C6CHO} + h\nu \rightarrow \text{CHOC3COCO3} + \text{CH}_3\text{C(O)}$                                                                                                                               | $2.15 * \text{jx}(\text{ip\_MGLYOX})$                                | Rickard (2022)           |
| J47201 | TrGJTerC  | $\text{C235C6CO3H} + h\nu \rightarrow \text{CO235C6O2} + \text{CO}_2 + \text{OH}$                                                                                                                               | $\text{jx}(\text{ip\_CH300H}) + 2.15 * \text{jx}(\text{ip\_MGLYOX})$ | Rickard (2022)           |
| J47202 | TrGJTerC  | $\text{C716OOH} + h\nu \rightarrow \text{CO13C4CHO} + \text{CH}_3\text{C(O)} + \text{OH}$                                                                                                                       | $\text{jx}(\text{ip\_CH300H}) + \text{jx}(\text{ip\_HOCH2CHO})$      | Rickard (2022)           |
| J47203 | TrGJTerC  | $\text{C721OOH} + h\nu \rightarrow \text{C722O2} + \text{OH}$                                                                                                                                                   | $\text{jx}(\text{ip\_CH300H})$                                       | Rickard (2022)           |
| J47204 | TrGJTerC  | $\text{C722OOH} + h\nu \rightarrow \text{CH}_3\text{COCH}_3 + \text{C44O2} + \text{OH}$                                                                                                                         | $\text{jx}(\text{ip\_CH300H})$                                       | Rickard (2022)           |
| J47400 | TrGJAroC  | $\text{TLEPOXMUC} + h\nu \rightarrow .5 \text{ C615CO2O2} + \text{HO}_2 + \text{CO} + .5 \text{ EPXC4DIAL} + .5 \text{ CH}_3\text{C(O)}$                                                                        | $4.E3 * \text{jx}(\text{ip\_MVK}) * 0.1$                             | Rickard (2022)           |
| J47401 | TrGJAroC  | $\text{C6H5CH2OOH} + h\nu \rightarrow \text{BENZAL} + \text{HO}_2 + \text{OH}$                                                                                                                                  | $\text{jx}(\text{ip\_CH300H})$                                       | Rickard (2022)*          |
| J47402 | TrGJAroCN | $\text{C6H5CH2NO3} + h\nu \rightarrow \text{BENZAL} + \text{HO}_2 + \text{NO}_2$                                                                                                                                | $0.59 * \text{j\_IC3H7N03}$                                          | Rickard (2022)*          |
| J47403 | TrGJAroC  | $\text{BENZAL} + h\nu \rightarrow \text{HO}_2 + \text{CO} + \text{C6H5O2}$                                                                                                                                      | $\text{jx}(\text{ip\_BENZAL})$                                       | Wallington et al. (2018) |
| J47404 | TrGJAroC  | $\text{TLBIPEROOH} + h\nu \rightarrow .6 \text{ GLYOX} + .4 \text{ MGLYOX} + \text{HO}_2 + .2 \text{ C4MDIAL} + .2 \text{ C5DICARB} + .2 \text{ TLFUONE} + .2 \text{ BZFUONE} + .2 \text{ MALDIAL} + \text{OH}$ | $\text{jx}(\text{ip\_CH300H})$                                       | Rickard (2022)*          |

Table 2: Photolysis reactions (... continued)

| #       | labels    | reaction                                                                                                                                         | rate coefficient                            | reference       |
|---------|-----------|--------------------------------------------------------------------------------------------------------------------------------------------------|---------------------------------------------|-----------------|
| J47405  | TrGJAroCN | TLBIPERNO3 + $h\nu$ → .6 GLYOX + .4 MGLYOX + HO <sub>2</sub> + .2 C4MDIAL + .2 C5DICARB + .2 TLFUONE + .2 BZFUONE + .2 MALDIAL + NO <sub>2</sub> | j_IC3H7N03                                  | Rickard (2022)* |
| J47406  | TrGJAroC  | TLOBIPEROH + $h\nu$ → C5CO14O2 + GLYOX + HO <sub>2</sub>                                                                                         | j_ACETOL                                    | Rickard (2022)  |
| J47407  | TrGJAroC  | CRESOOH + $h\nu$ → .68 C5CO14OH + .68 GLYOX + HO <sub>2</sub> + .32 PTLQONE + OH                                                                 | jx(ip_CH300H)                               | Rickard (2022)* |
| J47408a | TrGJAroCN | NCRESOOH + $h\nu$ → .68 C5CO14OH + .68 GLYOX + HO <sub>2</sub> + .32 PTLQONE + OH + NO <sub>2</sub>                                              | j_IC3H7N03                                  | Rickard (2022)* |
| J47408b | TrGJAroCN | NCRESOOH + $h\nu$ → C5CO14OH + GLYOX + NO <sub>2</sub> + OH                                                                                      | jx(ip_CH300H)                               | Rickard (2022)* |
| J47409  | TrGJAroCN | TOL1OHNO2 + $h\nu$ → HONO + MCPDKETENE                                                                                                           | jx(ip_H0Ph3Me2N02)                          | see note*       |
| J47410  | TrGJAroC  | TLEMUCCO2H + $h\nu$ → C615CO2O2 + CO <sub>2</sub> + HO <sub>2</sub>                                                                              | jx(ip_MACR)                                 | Rickard (2022)  |
| J47411  | TrGJAroC  | TLEMUCCO3H + $h\nu$ → C615CO2O2 + CO <sub>2</sub> + OH                                                                                           | jx(ip_CH300H)+jx(ip_MACR)                   | Rickard (2022)  |
| J47412  | TrGJAroC  | TLEMUCOOH + $h\nu$ → .5 C3DIALO2 + .5 CO2H3CHO + .5 EPXC4DIAL + .5 MGLYOX + .5 HO <sub>2</sub> + OH                                              | jx(ip_CH300H)+2.77*jx(ip_HOCH2CHO)+j_ACETOL | Rickard (2022)* |
| J47413  | TrGJAroCN | TLEMUCNO3 + $h\nu$ → EPXC4DIAL + NO <sub>2</sub> + CH <sub>3</sub> C(O) + CO + HO <sub>2</sub>                                                   | 2.77*jx(ip_HOCH2CHO)+j_ACETOL               | Rickard (2022)  |
| J47414  | TrGJAroC  | TLEMUCCO + $h\nu$ → CH <sub>3</sub> C(O) + EPXC4DIAL + CO + HO <sub>2</sub>                                                                      | 2.77*jx(ip_HOCH2CHO)+2.15*jx(ip_MGLYOX)     | Rickard (2022)  |
| J47415  | TrGJAroC  | C6H5CO3H + $h\nu$ → C6H5O2 + CO <sub>2</sub> + OH                                                                                                | jx(ip_CH300H)                               | Rickard (2022)  |
| J47416  | TrGJAroC  | OXYL1OOH + $h\nu$ → TOL1O + OH                                                                                                                   | jx(ip_CH300H)                               | Rickard (2022)  |
| J47417  | TrGJAroCN | MNCATECH + $h\nu$ → HONO + MCPDKETENE                                                                                                            | jx(ip_H0Ph3Me2N02)                          | see note*       |
| J47418  | TrGJAroC  | MCPDKETENE + $h\nu$ → CO <sub>2</sub> + CO + 2 HO <sub>2</sub> + C4MDIAL                                                                         | j_ketene                                    | see note*       |
| J47419  | TrGJAroCN | DNCRES + $h\nu$ → HONO + MNCPDKETENE                                                                                                             | jx(ip_H0Ph3Me2N02)                          | see note*       |
| J47420  | TrGJAroCN | MNCPDKETENE + $h\nu$ → CO <sub>2</sub> + CO + 2 HO <sub>2</sub> + NC4MDCO2HN                                                                     | j_ketene                                    | see note*       |
| J47421  | TrGJAroC  | MCATEC1OOH + $h\nu$ → MCATEC1O + OH                                                                                                              | jx(ip_CH300H)                               | Rickard (2022)  |
| J47422  | TrGJAroCN | NPTLQOOH + $h\nu$ → C7CO4DB + NO <sub>2</sub> + OH                                                                                               | jx(ip_CH300H)                               | Rickard (2022)* |
| J47423  | TrGJAroC  | PTLQOOH + $h\nu$ → C6CO2OHCO3 + OH                                                                                                               | jx(ip_CH300H)                               | Rickard (2022)* |
| J47424  | TrGJAroCN | NCRES1OOH + $h\nu$ → NCRES1O + OH                                                                                                                | jx(ip_CH300H)                               | Rickard (2022)  |
| J47425  | TrGJAroCN | MNNCATCOOH + $h\nu$ → NC4MDCO2HN + HCOCO <sub>2</sub> H + NO <sub>2</sub> + OH                                                                   | jx(ip_CH300H)                               | Rickard (2022)* |
| J47426  | TrGJAroCN | MNCATECOOH + $h\nu$ → NC4MDCO2HN + HCOCO <sub>2</sub> H + HO <sub>2</sub> + OH                                                                   | jx(ip_CH300H)                               | Rickard (2022)* |
| J47427  | TrGJAroC  | C7CO4DB + $h\nu$ → C5CO2DBCO3 + HO <sub>2</sub> + CO                                                                                             | jx(ip_MGLYOX)*2.                            | Rickard (2022)  |

Table 2: Photolysis reactions (... continued)

| #       | labels    | reaction                                                                                                                  | rate coefficient                                         | reference                                   |
|---------|-----------|---------------------------------------------------------------------------------------------------------------------------|----------------------------------------------------------|---------------------------------------------|
| J47428  | TrGJAroCN | $\text{NDNCRESOOH} + h\nu \rightarrow \text{NC4MDCO2HN} + \text{HNO}_3 + \text{CO} + \text{CO} + \text{NO}_2 + \text{OH}$ | $\text{jx(ip\_CH300H)}$                                  | Rickard (2022)*                             |
| J47429  | TrGJAroCN | $\text{DNCRESOOH} + h\nu \rightarrow \text{NC4MDCO2HN} + \text{HCOCO}_2\text{H} + \text{NO}_2 + \text{OH}$                | $\text{jx(ip\_CH300H)}$                                  | Rickard (2022)*                             |
| J47430  | TrGJAroC  | $\text{C6COOHCO3H} + h\nu \rightarrow \text{C5134CO2OH} + \text{HO}_2 + \text{CO} + \text{CO}_2 + \text{OH}$              | $\text{jx(ip\_CH300H)}$                                  | Rickard (2022)                              |
| J48200  | TrGJTerC  | $\text{C86OOH} + h\nu \rightarrow \text{C511O2} + \text{CH}_3\text{COCH}_3 + \text{OH}$                                   | $\text{jx(ip\_CH300H)} + \text{jx(ip\_HOCH2CHO)}$        | Rickard (2022)                              |
| J48201  | TrGJTerC  | $\text{C812OOH} + h\nu \rightarrow \text{C813O2} + \text{OH}$                                                             | $\text{jx(ip\_CH300H)}$                                  | Rickard (2022)                              |
| J48202  | TrGJTerC  | $\text{C813OOH} + h\nu \rightarrow \text{CH}_3\text{COCH}_3 + \text{C512O2} + \text{OH}$                                  | $\text{jx(ip\_CH300H)} + \text{jx(ip\_MGLYOX)}$          | Rickard (2022)                              |
| J48203  | TrGJTerC  | $\text{C721CHO} + h\nu \rightarrow \text{C721O2} + \text{CO} + \text{HO}_2$                                               | $\text{jx(ip\_HOCH2CHO)}$                                | Rickard (2022)                              |
| J48204  | TrGJTerC  | $\text{C721CO3H} + h\nu \rightarrow \text{C721O2} + \text{CO}_2 + \text{OH}$                                              | $\text{jx(ip\_CH300H)}$                                  | Rickard (2022)                              |
| J48205  | TrGJTerC  | $\text{C8BCOOH} + h\nu \rightarrow \text{C89O2} + \text{OH}$                                                              | $\text{jx(ip\_CH300H)}$                                  | Rickard (2022)                              |
| J48206  | TrGJTerC  | $\text{C89OOH} + h\nu \rightarrow \text{C810O2} + \text{OH}$                                                              | $\text{jx(ip\_CH300H)} + \text{jx(ip\_HOCH2CHO)}$        | Rickard (2022)                              |
| J48207  | TrGJTerCN | $\text{C89NO3} + h\nu \rightarrow \text{C810O2} + \text{NO}_2$                                                            | $\text{jx(ip\_CH300H)} + \text{jx(ip\_HOCH2CHO)}$        | Rickard (2022)                              |
| J48208  | TrGJTerC  | $\text{C810OOH} + h\nu \rightarrow \text{CH}_3\text{COCH}_3 + \text{C514O2} + \text{OH}$                                  | $\text{jx(ip\_CH300H)} + \text{jx(ip\_HOCH2CHO)}$        | Rickard (2022)                              |
| J48209  | TrGJTerCN | $\text{C810NO3} + h\nu \rightarrow \text{CH}_3\text{COCH}_3 + \text{C514O2} + \text{NO}_2$                                | $2.84 * \text{j\_IC3H7N03} + \text{jx(ip\_HOCH2CHO)}$    | Rickard (2022)                              |
| J48210  | TrGJTerCN | $\text{C8BCNO3} + h\nu \rightarrow \text{C89O2} + \text{NO}_2$                                                            | $\text{j\_IC3H7N03}$                                     | Rickard (2022)                              |
| J48211  | TrGJTerC  | $\text{C85OOH} + h\nu \rightarrow \text{C86O2} + \text{OH}$                                                               | $\text{jx(ip\_CH300H)} + \text{j\_ACETOL}$               | Rickard (2022)                              |
| J48400  | TrGJAroC  | $\text{STYRENOOH} + h\nu \rightarrow \text{HO}_2 + \text{HCHO} + \text{BENZAL} + \text{OH}$                               | $\text{jx(ip\_CH300H)}$                                  | Rickard (2022)*                             |
| J49200  | TrGJTerC  | $\text{C96OOH} + h\nu \rightarrow \text{C97O2} + \text{OH}$                                                               | $\text{jx(ip\_CH300H)} + \text{j\_ACETOL}$               | Rickard (2022)                              |
| J49201  | TrGJTerC  | $\text{C97OOH} + h\nu \rightarrow \text{C98O2} + \text{OH}$                                                               | $\text{jx(ip\_CH300H)} + \text{j\_ACETOL}$               | Rickard (2022)                              |
| J49202  | TrGJTerC  | $\text{C98OOH} + h\nu \rightarrow \text{C614O2} + \text{CH}_3\text{COCH}_3 + \text{OH}$                                   | $(\text{jx(ip\_CH300H)} + 2.15 * \text{jx(ip\_MGLYOX)})$ | Rickard (2022)                              |
| J49203a | TrGJTerC  | $\text{NORPINAL} + h\nu \rightarrow \text{C85O2} + \text{CO} + \text{HO}_2$                                               | $\text{jx(ip\_PINAL2HCO)}$                               | Rickard (2022), Sander et al. (2019)        |
| J49203b | TrGJTerC  | $\text{NORPINAL} + h\nu \rightarrow \text{NORPINENOL}$                                                                    | $\text{jx(ip\_PINAL2ENOL)}$                              | Sander et al. (2019), Andrews et al. (2012) |
| J49204  | TrGJTerC  | $\text{C85CO3H} + h\nu \rightarrow \text{C85O2} + \text{CO}_2 + \text{OH}$                                                | $\text{jx(ip\_CH300H)} + \text{j\_ACETOL}$               | Rickard (2022)                              |
| J49205  | TrGJTerC  | $\text{C89CO2H} + h\nu \rightarrow .8 \text{ C811CO3} + .2 \text{ C89O2} + .2 \text{ CO}_2 + \text{HO}_2$                 | $\text{jx(ip\_HOCH2CHO)}$                                | Rickard (2022)                              |
| J49206  | TrGJTerC  | $\text{C89CO3H} + h\nu \rightarrow .8 \text{ C811CO3} + .2 \text{ C89O2} + .2 \text{ CO}_2 + \text{OH}$                   | $\text{jx(ip\_CH300H)} + \text{jx(ip\_HOCH2CHO)}$        | Rickard (2022)                              |
| J49207  | TrGJTerC  | $\text{C811CO3H} + h\nu \rightarrow \text{C811O2} + \text{CO}_2 + \text{OH}$                                              | $\text{jx(ip\_CH300H)}$                                  | Rickard (2022)                              |
| J49208  | TrGJTerC  | $\text{NOPINDOOH} + h\nu \rightarrow \text{C89CO3} + \text{OH}$                                                           | $\text{jx(ip\_CH300H)}$                                  | Rickard (2022)                              |
| J40200  | TrGJTerC  | $\text{LAPINABOOH} + h\nu \rightarrow \text{PINAL} + \text{HO}_2 + \text{OH}$                                             | $\text{jx(ip\_CH300H)}$                                  | Rickard (2022)                              |
| J40201  | TrGJTerC  | $\text{MENTHEN6ONE} + h\nu \rightarrow \text{RO6R1O2} + \text{OH}$                                                        | $\text{jx(ip\_CH300H)}$                                  | Vereecken et al. (2007)                     |
| J40202  | TrGJTerC  | $\text{2OHMENTHEN6ONE} + h\nu \rightarrow 10 \text{ LCARBON} + \text{OH}$                                                 | $\text{jx(ip\_CH300H)}$                                  | Vereecken et al. (2007)                     |

Table 2: Photolysis reactions (... continued)

| #       | labels     | reaction                                                                                            | rate coefficient              | reference                                    |
|---------|------------|-----------------------------------------------------------------------------------------------------|-------------------------------|----------------------------------------------|
| J40203a | TrGJTerC   | PINAL + $h\nu \rightarrow$ C96O2 + CO + HO <sub>2</sub>                                             | jx(ip_PINAL2HCO)              | Rickard (2022)                               |
| J40203b | TrGJTerC   | PINAL + $h\nu \rightarrow$ PINEOL                                                                   | jx(ip_PINAL2ENOL)             | Sander et al. (2019), Andrews et al. (2012)* |
| J40204  | TrGJTerC   | PERPINONIC + $h\nu \rightarrow$ C96O2 + CO <sub>2</sub> + OH                                        | jx(ip_CH300H)+j_ACETOL        | Rickard (2022)                               |
| J40205  | TrGJTerC   | PINALOOH + $h\nu \rightarrow$ C106O2 + OH                                                           | jx(ip_CH300H)+jx(ip_HOCH2CHO) | Rickard (2022)                               |
| J40206  | TrGJTerCN  | PINALNO3 + $h\nu \rightarrow$ C106O2 + NO <sub>2</sub>                                              | j_IC3H7N03+jx(ip_HOCH2CHO)    | Rickard (2022)                               |
| J40207  | TrGJTerC   | C106OOH + $h\nu \rightarrow$ C716O2 + CH <sub>3</sub> COCH <sub>3</sub> + OH                        | jx(ip_CH300H)+jx(ip_HOCH2CHO) | Rickard (2022)                               |
| J40208  | TrGJTerCN  | C106NO3 + $h\nu \rightarrow$ C716O2 + CH <sub>3</sub> COCH <sub>3</sub> + NO <sub>2</sub>           | j_IC3H7N03+ jx(ip_HOCH2CHO)   | Rickard (2022)                               |
| J40209  | TrGJTerC   | C109OOH + $h\nu \rightarrow$ C89CO3 + HCHO + OH                                                     | jx(ip_CH300H)+jx(ip_HOCH2CHO) | Rickard (2022)                               |
| J40210  | TrGJTerC   | C109CO + $h\nu \rightarrow$ C89CO3 + CO + HO <sub>2</sub>                                           | jx(ip_MGLY0X)+jx(ip_HOCH2CHO) | Rickard (2022)                               |
| J40211  | TrGJTerCN  | LNAPINABOOH + $h\nu \rightarrow$ PINAL + NO <sub>2</sub> + OH                                       | jx(ip_CH300H)                 | Rickard (2022)                               |
| J40212  | TrGJTerC   | BPINAOOH + $h\nu \rightarrow$ NOPINONE + HCHO + HO <sub>2</sub> + OH                                | jx(ip_CH300H)                 | Rickard (2022)                               |
| J40213  | TrGJTerCN  | LNBPINABOOH + $h\nu \rightarrow$ NOPINONE + HCHO + NO <sub>2</sub> + OH                             | jx(ip_CH300H)                 | Rickard (2022)                               |
| J40214  | TrGJTerCN  | ROO6R1NO3 + $h\nu \rightarrow$ ROO6R3O2 + CH <sub>3</sub> COCH <sub>3</sub> + NO <sub>2</sub>       | 2.84*j_IC3H7N03+jx(ip_CH300H) | Sander et al. (2019)                         |
| J40215  | TrGJTerCN  | RO6R1NO3 + $h\nu \rightarrow$ 9 LCARBON + HCHO + HO <sub>2</sub> + NO <sub>2</sub>                  | 2.84*j_IC3H7N03               | Sander et al. (2019)                         |
| J6000   | StTrGJCl   | Cl <sub>2</sub> + $h\nu \rightarrow$ Cl + Cl                                                        | jx(ip_Cl2)                    | Sander et al. (2014)                         |
| J6100   | StTrGJCl   | Cl <sub>2</sub> O <sub>2</sub> + $h\nu \rightarrow$ 2 Cl                                            | jx(ip_Cl202)                  | Sander et al. (2014)                         |
| J6101   | StTrGJCl   | OClo + $h\nu \rightarrow$ ClO + O( <sup>3</sup> P)                                                  | jx(ip_0Cl0)                   | Sander et al. (2014)                         |
| J61MS   | StTrGJCl   | ClO + $h\nu \rightarrow$ Cl + O( <sup>3</sup> P)                                                    | jx(ip_Cl0)                    | Atkinson et al. (2007)                       |
| J62MS   | StTrGJCl   | Cl <sub>2</sub> O + $h\nu \rightarrow$ Cl + ClO                                                     | jx(ip_Cl20)                   | Atkinson et al. (2007)                       |
| J63MS   | StTrGJCl   | Cl <sub>2</sub> O <sub>3</sub> + $h\nu \rightarrow$ ClO + ClO <sub>2</sub>                          | jx(ip_Cl203)                  | Atkinson et al. (2007)                       |
| J6201   | StTrGJCl   | HOCl + $h\nu \rightarrow$ OH + Cl                                                                   | jx(ip_HOCl)                   | Sander et al. (2014)                         |
| J6300   | TrGJCIN    | ClNO <sub>2</sub> + $h\nu \rightarrow$ Cl + NO <sub>2</sub>                                         | jx(ip_ClN02)                  | Sander et al. (2014)                         |
| J6301a  | StTrGJCIN  | ClNO <sub>3</sub> + $h\nu \rightarrow$ Cl + NO <sub>3</sub>                                         | jx(ip_ClN03)                  | Sander et al. (2014)                         |
| J6301b  | StTrGJCIN  | ClNO <sub>3</sub> + $h\nu \rightarrow$ ClO + NO <sub>2</sub>                                        | jx(ip_ClON02)                 | Sander et al. (2014)                         |
| J64MS   | TrGJCIN    | ClNO + $h\nu \rightarrow$ Cl + NO                                                                   | jx(ip_ClN0)                   | Atkinson et al. (2007)                       |
| J65MS   | TrGJCIN    | ClONO + $h\nu \rightarrow$ Cl + NO <sub>2</sub>                                                     | jx(ip_ClON0)                  | Atkinson et al. (2007)                       |
| J7000   | StTrGJBr   | Br <sub>2</sub> + $h\nu \rightarrow$ Br + Br                                                        | jx(ip_Br2)                    | Sander et al. (2014)                         |
| J7100   | StTrGJBr   | BrO + $h\nu \rightarrow$ Br + O( <sup>3</sup> P)                                                    | jx(ip_Br0)                    | Sander et al. (2014)                         |
| J7200   | StTrGJBr   | HOBr + $h\nu \rightarrow$ Br + OH                                                                   | jx(ip_HOBr)                   | Sander et al. (2014)                         |
| J7300   | TrGJBrN    | BrNO <sub>2</sub> + $h\nu \rightarrow$ Br + NO <sub>2</sub>                                         | jx(ip_BrN02)                  | Sander et al. (2014)                         |
| J7301   | StTrGJBrN  | BrNO <sub>3</sub> + $h\nu \rightarrow$ .85 Br + .85 NO <sub>3</sub> + .15 BrO + .15 NO <sub>2</sub> | jx(ip_BrN03)                  | Sander et al. (2014)*                        |
| J7401   | TrGJBr     | CH <sub>2</sub> Br <sub>2</sub> + $h\nu \rightarrow$ LCARBON + 2 Br                                 | jx(ip_CH2Br2)                 | Sander et al. (2014)                         |
| J7402   | TrGJBr     | CHBr <sub>3</sub> + $h\nu \rightarrow$ LCARBON + 3 Br                                               | jx(ip_CHBr3)                  | Sander et al. (2014)                         |
| J7600   | StTrGJBrCl | BrCl + $h\nu \rightarrow$ Br + Cl                                                                   | jx(ip_BrCl)                   | Sander et al. (2014)                         |



Table 2: Photolysis reactions (... continued)

| #            | labels     | reaction                                                                                                                                                                                                                            | rate coefficient                                                                             | reference                |
|--------------|------------|-------------------------------------------------------------------------------------------------------------------------------------------------------------------------------------------------------------------------------------|----------------------------------------------------------------------------------------------|--------------------------|
| J7602        | TrGJBrCl   | $\text{CH}_2\text{ClBr} + h\nu \rightarrow \text{LCARBON} + \text{Br} + \text{Cl}$                                                                                                                                                  | $\text{jx}(\text{ip\_CH2ClBr})$                                                              | Sander et al. (2014)     |
| J7603        | TrGJBrCl   | $\text{CHCl}_2\text{Br} + h\nu \rightarrow \text{LCARBON} + \text{Br} + 2 \text{Cl}$                                                                                                                                                | $\text{jx}(\text{ip\_CHCl2Br})$                                                              | Sander et al. (2014)     |
| J7604        | TrGJBrCl   | $\text{CHClBr}_2 + h\nu \rightarrow \text{LCARBON} + 2 \text{Br} + \text{Cl}$                                                                                                                                                       | $\text{jx}(\text{ip\_CHClBr2})$                                                              | Sander et al. (2014)     |
| PH (aqueous) |            |                                                                                                                                                                                                                                     |                                                                                              |                          |
| PH2100_a01   | TrAa01ScJ  | $\text{H}_2\text{O}_2(\text{aq}) + h\nu \rightarrow 2 \text{OH}(\text{aq})$                                                                                                                                                         | $2.33*\text{xaer}(01)*\text{jx}(\text{ip\_H2O2})$                                            | see note*                |
| PH3200_a01   | TrAa01JN   | $\text{NO}_3^-(\text{aq}) + h\nu \rightarrow \text{NO}_2(\text{aq}) + \text{OH}(\text{aq}) + \text{OH}^-(\text{aq})$                                                                                                                | $\text{xaer}(01)*\text{jx}(\text{ip\_NO2}) * 1.4\text{E-}4$                                  | see note*                |
| PH4100_a01   | TrAa01ScJ  | $\text{HOCH}_2\text{OOH}(\text{aq}) + h\nu \rightarrow \text{HCOOH}(\text{aq}) + \text{OH}(\text{aq}) + \text{HO}_2(\text{aq})$                                                                                                     | $2.33*\text{xaer}(01)*\text{jx}(\text{ip\_CH300H})$                                          | Sander et al. (2014)     |
| PH4101_a01   | TrAa01ScJ  | $\text{CH}_3\text{OOH}(\text{aq}) + h\nu \rightarrow \text{HCHO}(\text{aq}) + \text{OH}(\text{aq}) + \text{HO}_2(\text{aq})$                                                                                                        | $2.33*\text{xaer}(01)*\text{jx}(\text{ip\_CH300H})$                                          | Sander et al. (2014)     |
| PH4200_a01   | TrAa01ScJC | $\text{C}_2\text{H}_5\text{OOH}(\text{aq}) + h\nu \rightarrow \text{CH}_3\text{CHO}(\text{aq}) + \text{HO}_2(\text{aq}) + \text{OH}(\text{aq})$                                                                                     | $2.33*\text{xaer}(01)*\text{jx}(\text{ip\_CH300H})$                                          | von Kuhlmann (2001)*     |
| PH4201_a01   | TrAa01ScJC | $\text{HOOCH}_2\text{CO}_2\text{H}(\text{aq}) + h\nu \rightarrow \text{HCHO}(\text{aq}) + \text{CO}_2(\text{aq}) + \text{HO}_2(\text{aq}) + \text{OH}(\text{aq})$                                                                   | $2.33*\text{xaer}(01)*\text{jx}(\text{ip\_CH300H})$                                          | Rickard (2022)*          |
| PH4202_a01   | TrAa01ScJC | $\text{CH}_2\text{OOHCO}_2^-(\text{aq}) + h\nu \rightarrow \text{CHOHOOC}_2^-(\text{aq}) + \text{OH}(\text{aq})$                                                                                                                    | $2.33*\text{xaer}(01)*\text{jx}(\text{ip\_CH300H})$                                          | see note*                |
| PH4203_a01   | TrAa01ScJC | $\text{CH}_3\text{C}(\text{O})\text{OOH}(\text{aq}) + h\nu \rightarrow \text{CH}_3\text{OO}(\text{aq}) + \text{CO}_2(\text{aq}) + \text{OH}(\text{aq})$                                                                             | $2.33*\text{xaer}(01)*\text{jx}(\text{ip\_CH3C03H})$                                         | Sander et al. (2014)     |
| PH4204_a01   | TrAa01ScJC | $\text{HOCH}_2\text{CO}_3\text{H}(\text{aq}) + h\nu \rightarrow \text{HCHO}(\text{aq}) + \text{OH}(\text{aq}) + \text{HO}_2(\text{aq}) + \text{CO}_2(\text{aq})$                                                                    | $2.33*\text{xaer}(01)*\text{jx}(\text{ip\_CH300H})$                                          | Rickard (2022)           |
| PH4205_a01   | TrAa01ScJC | $\text{CH}_3\text{CHO}(\text{aq}) + h\nu \rightarrow \text{CH}_3\text{OO}(\text{aq}) + \text{HO}_2(\text{aq}) + \text{CO}(\text{aq})$                                                                                               | $2.33*\text{xaer}(01)*\text{jx}(\text{ip\_CH3CHO})$                                          | Sander et al. (2014)     |
| PH4206_a01   | TrAa01ScJC | $\text{CH}_2\text{OOHCHO}(\text{aq}) + h\nu \rightarrow \text{OH}(\text{aq}) + \text{HCHO}(\text{aq}) + \text{CO}(\text{aq}) + \text{HO}_2(\text{aq})$                                                                              | $2.33*\text{xaer}(01)*(\text{jx}(\text{ip\_CH300H}) + \text{jx}(\text{ip\_HOCH2CHO}))$       | Sander et al. (2019)     |
| PH4207a_a01  | TrAa01ScJC | $\text{CH}_2\text{OHCHO}(\text{aq}) + h\nu \rightarrow \text{HCHO}(\text{aq}) + 2 \text{HO}_2(\text{aq}) + \text{CO}(\text{aq})$                                                                                                    | $2.33*\text{xaer}(01)*\text{jx}(\text{ip\_HOCH2CHO}) * 0.83$                                 | Sander et al. (2014)*    |
| PH4207b_a01  | TrAa01ScJC | $\text{CH}_2\text{OHCHO}(\text{aq}) + h\nu \rightarrow \text{OH}(\text{aq}) + .6 \text{HCHO}(\text{aq}) + .6 \text{CO}(\text{aq}) + .6 \text{HO}_2(\text{aq}) + .2 \text{GLYOX}(\text{aq}) + .2 \text{CH}_2\text{OHCHO}(\text{aq})$ | $2.33*\text{xaer}(01)*\text{jx}(\text{ip\_HOCH2CHO}) * 0.07$                                 | Sander et al. (2014)*    |
| PH4207c_a01  | TrAa01ScJC | $\text{CH}_2\text{OHCHO}(\text{aq}) + h\nu \rightarrow \text{CH}_3\text{OH}(\text{aq}) + \text{CO}(\text{aq})$                                                                                                                      | $2.33*\text{xaer}(01)*\text{jx}(\text{ip\_HOCH2CHO}) * 0.10$                                 | Sander et al. (2014)*    |
| PH4208_a01   | TrAa01ScJC | $\text{CHOCOOH}(\text{aq}) + h\nu \rightarrow 2 \text{HO}_2(\text{aq}) + \text{CO}(\text{aq}) + \text{CO}_2(\text{aq})$                                                                                                             | $2.33*\text{xaer}(01)*\text{jx}(\text{ip\_MGLYOX})$                                          | Rickard (2022)           |
| PH4209_a01   | TrAa01ScJC | $\text{GLYOX}(\text{aq}) + h\nu \rightarrow 2 \text{CO}(\text{aq}) + 2 \text{HO}_2(\text{aq})$                                                                                                                                      | $2.33*\text{xaer}(01)*\text{jx}(\text{ip\_GLYOX})$                                           | Sander et al. (2014)     |
| PH4210a_a01  | TrAa01ScJC | $\text{HOCCOOH}(\text{aq}) + h\nu \rightarrow \text{CO}_2(\text{aq}) + \text{HCOOH}(\text{aq})$                                                                                                                                     | $2.33*\text{xaer}(01)*0.72*\text{jx}(\text{ip\_HOCCOOH})$                                    | Yamamoto and Back (1985) |
| PH4210b_a01  | TrAa01ScJC | $\text{HOCCOOH}(\text{aq}) + h\nu \rightarrow \text{CO}_2(\text{aq}) + \text{CO}(\text{aq}) + \text{H}_2\text{O}(\text{aq})$                                                                                                        | $2.33*\text{xaer}(01)*0.28*\text{jx}(\text{ip\_HOCCOOH})$                                    | Yamamoto and Back (1985) |
| PH4211_a01   | TrAa01ScJC | $\text{CHOCHOHOH}(\text{aq}) + h\nu \rightarrow \text{HCOOH}(\text{aq}) + 2 \text{HO}_2(\text{aq}) + \text{CO}(\text{aq})$                                                                                                          | $2.33*\text{xaer}(01)*\text{jx}(\text{ip\_HOCH2CHO})$                                        | Sander et al. (2014)*    |
| PH4300_a01   | TrAa01ScJC | $\text{CH}_3\text{COCH}_2\text{O}_2\text{H}(\text{aq}) + h\nu \rightarrow \text{CH}_3\text{COOO}(\text{aq}) + \text{HCHO}(\text{aq}) + \text{OH}(\text{aq})$                                                                        | $2.33*\text{xaer}(01)*(\text{jx}(\text{ip\_CH300H}) + 0.65*0.11*\text{jx}(\text{ip\_CHOH}))$ | see note*                |
| PH4301_a01   | TrAa01ScJC | $\text{iC}_3\text{H}_7\text{OOH}(\text{aq}) + h\nu \rightarrow \text{CH}_3\text{COCH}_3(\text{aq}) + \text{HO}_2(\text{aq}) + \text{OH}(\text{aq})$                                                                                 | $2.33*\text{xaer}(01)*\text{jx}(\text{ip\_CH300H})$                                          | see note*                |

Table 2: Photolysis reactions (... continued)

| #           | labels     | reaction                                                                                                                                                                                                                                                                                     | rate coefficient                                                                        | reference              |
|-------------|------------|----------------------------------------------------------------------------------------------------------------------------------------------------------------------------------------------------------------------------------------------------------------------------------------------|-----------------------------------------------------------------------------------------|------------------------|
| PH4302_a01  | TrAa01ScJC | $\text{CH}_3\text{COCH}_2\text{OH}(\text{aq}) + h\nu \rightarrow .5 \text{ OH}(\text{aq}) + .5 \text{ HCHO}(\text{aq}) + .5 \text{ CO}(\text{aq}) + .5 \text{ HCHO}(\text{aq}) + .5 \text{ HO}_2(\text{aq}) + .5 \text{ CH}_2\text{OHCO}_3(\text{aq}) + .5 \text{ CH}_3\text{OO}(\text{aq})$ | $2.33 \times \text{xaer}(01) \times 0.65 \times 0.11 \times \text{jx}(\text{ip\_CHOH})$ | Sander et al. (2014)*  |
| PH4303_a01  | TrAa01ScJC | $\text{CH}_3\text{C}(\text{O})\text{CHO}(\text{aq}) + h\nu \rightarrow \text{OH}(\text{aq}) + \text{HCHO}(\text{aq}) + \text{CO}(\text{aq}) + \text{CO}(\text{aq}) + \text{HO}_2(\text{aq})$                                                                                                 | $2.33 \times \text{xaer}(01) \times \text{jx}(\text{ip\_MGLYOX})$                       | Sander et al. (2014)*  |
| PH11200_a01 | TrAa01JFe  | $\text{FeOH}^{2+}(\text{aq}) + h\nu \rightarrow \text{Fe}^{2+}(\text{aq}) + \text{OH}(\text{aq})$                                                                                                                                                                                            | $\text{xaer}(01) \times 4.51\text{E-}3 \times 0.312$                                    | Herrmann et al. (2000) |
| PH11201_a01 | TrAa01JFe  | $\text{Fe}(\text{OH})_2^+(\text{aq}) + h\nu \rightarrow \text{Fe}^{2+}(\text{aq}) + \text{OH}(\text{aq}) + \text{OH}^-(\text{aq})$                                                                                                                                                           | $\text{xaer}(01) \times 5.77\text{E-}3 \times 0.255$                                    | Herrmann et al. (2000) |
| PH11800_a01 | TrAa01JFeS | $\text{FeSO}_4^+(\text{aq}) + h\nu \rightarrow \text{Fe}^{2+}(\text{aq}) + \text{SO}_4^-(\text{aq})$                                                                                                                                                                                         | $\text{xaer}(01) \times 6.43\text{E-}3 \times 7.9\text{E-}3$                            | Herrmann et al. (2000) |

## General notes

*j*-values are calculated with an external module (e.g., JVAL) and then supplied to the MECCA chemistry.

Values that originate from the Master Chemical Mechanism (MCM) by Rickard (2022) are translated accordingly in the following way:

$\text{j}(11) \rightarrow \text{jx}(\text{ip\_COH}_2)$   
 $\text{j}(12) \rightarrow \text{jx}(\text{ip\_CHOH})$   
 $\text{j}(15) \rightarrow \text{jx}(\text{ip\_HOCH}_2\text{CHO})$   
 $\text{j}(18) \rightarrow \text{jx}(\text{ip\_MACR})$   
 $\text{j}(22) \rightarrow \text{jx}(\text{ip\_ACETOL})$   
 $\text{j}(23)+\text{j}(24) \rightarrow \text{jx}(\text{ip\_MVK})$   
 $\text{j}(31)+\text{j}(32)+\text{j}(33) \rightarrow \text{jx}(\text{ip\_GLYOX})$   
 $\text{j}(34) \rightarrow \text{jx}(\text{ip\_MGLYOX})$   
 $\text{j}(41) \rightarrow \text{jx}(\text{ip\_CH}_3\text{OOH})$   
 $\text{j}(53) \rightarrow \text{j}(\text{isopropyl nitrate})$   
 $\text{j}(54) \rightarrow \text{j}(\text{isopropyl nitrate})$   
 $\text{j}(55) \rightarrow \text{j}(\text{isopropyl nitrate})$   
 $\text{j}(56)+\text{j}(57) \rightarrow \text{jx}(\text{ip\_NOA})$

## Specific notes

J41006: product distribution as for HNO<sub>4</sub>

J42004: Quantum yields from Burkholder et al. (2015).

J42005a: Quantum yields from Burkholder et al. (2015).

J42005b: Quantum yields from Burkholder et al. (2015).

J42005c: Quantum yields from Burkholder et al. (2015).

J42007: It is assumed that J(PHAN) is the same as J(PAN).

J42017: Enhancement of *j* according to Müller et al. (2014).

J42020: It is assumed that *j*(NO<sub>3</sub>CH<sub>2</sub>CHO) is the same as *j*(PAN).

J42021: In analogy to what is assumed for CH<sub>3</sub>O<sub>2</sub>NO<sub>2</sub> photolysis as in (Sander et al., 2014).

J43002: Following von Kuhlmann et al. (2003), we use *j*(CH<sub>3</sub>COCH<sub>2</sub>OH) = 0.11 × *jx*(ip\_CHOH). As an additional factor, the quantum yield of 0.65 is taken from Orlando et al. (1999a).

J43006: Following von Kuhlmann et al. (2003), we use J(iC<sub>3</sub>H<sub>7</sub>ONO<sub>2</sub>) = 3.7 × *jx*(ip\_PAN).

J43018: One third of the acetaldehyde channel is considered to be CH<sub>2</sub>CHOH according to Hjorth (2002) EUPHORE Report.

J43024: Assuming J(C<sub>3</sub>H<sub>7</sub>ONO<sub>2</sub>) = 0.59 × J(iC<sub>3</sub>H<sub>7</sub>ONO<sub>2</sub>), consistent with the photolysis rate coefficients used in the MCM (Rickard, 2022).

J43025a: Photolysis frequencies very similar to the ones of CH<sub>3</sub>CHO.

J43025b: Photolysis frequencies very similar to the ones of CH<sub>3</sub>CHO.

J43400: KDEC C3DIALO → GLYOX + CO + HO<sub>2</sub>

J44004: It is assumed that J(BIACET) is 2.15 times larger than J(MGLYOX), consistent with the photolysis rate coefficients used in the MCM (Rickard, 2022).

J44005a: It is assumed that J(LC4H<sub>9</sub>NO<sub>3</sub>) is the same as J(iC<sub>3</sub>H<sub>7</sub>ONO<sub>2</sub>).

J44005b: It is assumed that J(LC4H<sub>9</sub>NO<sub>3</sub>) is the same as J(iC<sub>3</sub>H<sub>7</sub>ONO<sub>2</sub>).

J44006: It is assumed that J(MPAN) is the same as J(PAN).

J44009: It is assumed that J(MACROOH) is 2.77 times larger than J(HOCH<sub>2</sub>CHO), consistent with the photolysis rate coefficients used in the MCM (Rickard, 2022).

J44010: It is assumed that J(MACROH) is 2.77 times larger than J(HOCH<sub>2</sub>CHO), consistent with the photolysis rate coefficients used in the MCM (Rickard, 2022).

J44015: It is assumed that  $J(\text{BIACETOH})$  is 2.15 times larger than  $J(\text{MGLYOX})$ , consistent with the photolysis rate coefficients used in the MCM (Rickard, 2022).

J44017a: CO-channel yielding  $\text{CH}_3\text{COCH}$  which upon reaction with  $\text{O}_2$  produces an excited Criegee Intermediate assumed to be similar to MGLOOA in MCM. MGLOOA is produced also in other reactions and is substituted by its decomposition products. Furthermore, the stabilized Criegee Intermediate is assumed to solely react with water.

J44025: J values only for the secondary nitrate.

J44026: Like for LMEKNO3 photolysis

J44027:  $2.84 \times J(\text{IC}_3\text{H}_7\text{NO}_3)$  like for other tertiary alkyl nitrates (see J4505). Enhancement of J according to Müller et al. (2014).

J44037b: Channel which produces just vinyl alcohol and not a larger enol via keto-enol photo- tautomerization.

J44043: The resulting vinyl peroxy radical is assumed to mostly form with  $\text{HO}_2$  a labile hydroperoxide (see ketene formation). The products are further simplified.

J44044: 1,5-H-shift for the resulting vinyl peroxy radical assumed to be dominant.

J44046a: Simplified oxidation.

J44400b:  $\text{KDEC MALDIALO} \rightarrow \text{GLYOX} + \text{GLYOX} + \text{HO}_2$

J44401:  $\text{KDEC BZFUO} \rightarrow \text{CO}_2\text{HCHO} + \text{HO}_2$

J44403:  $\text{KDEC NBZFUO} \rightarrow 0.5 \text{ CO}_2\text{HCHO} + 0.5 \text{ NO}_2 + 0.5 \text{ NBZFUONE} + 0.5 \text{ HO}_2$

J44404b:  $\text{KDEC MALDIALCO}_2 \rightarrow 0.6 \text{ MALANHY} + \text{HO}_2 + 0.4 \text{ GLYOX} + 0.4 \text{ CO}$

J44407:  $\text{KDEC MALANHYO} \rightarrow \text{HCOCOHCO}_3$

J44414:  $\text{KDEC MECOACETO} \rightarrow \text{CH}_3\text{CO}_3 + \text{HCHO}$

J45003: It is assumed that  $J(\text{LISOPACNO}_3) = 0.59 \times J(\text{IC}_3\text{H}_7\text{ONO}_2)$ , consistent with the photolysis rate coefficients used in the MCM (Rickard, 2022).

J45005: It is assumed that  $J(\text{ISOPBNO}_3) = 2.84 \times J(\text{IC}_3\text{H}_7\text{ONO}_2)$ , consistent with the photolysis rate coefficients used in the MCM (Rickard, 2022).

J45007: It is assumed that  $J(\text{ISOPDNO}_3)$  is the same as  $J(\text{IC}_3\text{H}_7\text{ONO}_2)$ .

J45009:  $0.59 \times J(\text{IC}_3\text{H}_7\text{NO}_3)$  like for other primary alkyl nitrates (see J4503). Enhancement of J according to Müller et al. (2014).

J45015: Consistent with the MCM (Rickard, 2022), we assume that  $J(\text{HCOC}_5)$  is half as large as  $J(\text{MVK})$ . With exception of  $\text{HOCH}_2\text{CO}$  the products of  $\text{MACO}_2$  decomposition without  $\text{CO}_2$ .

J45032: approximation with 4-oxo-pentenal photolysis combining results of Thüner et al(2004) and Xiang et al(2007)

J45402:  $\text{KDEC C}_5\text{DIALO} \rightarrow \text{MALDIAL} + \text{CO} + \text{HO}_2$

J45407:  $\text{KDEC TLFUONE} \rightarrow 0.6 \text{ C}_5\text{CO}_2\text{HCHO} + 0.6 \text{ HO}_2 + 0.4 \text{ TLFUONE}$

J45410:  $\text{KDEC MMALANHYO} \rightarrow \text{CO}_2\text{H}_3\text{CO}_3$

J45411:  $\text{KDEC C}_5\text{DICARBO} \rightarrow \text{MGLYOX} + \text{GLYOX} + \text{HO}_2$

J45412:  $\text{KDEC NTLFUO} \rightarrow \text{ACCOMECCHO} + \text{NO}_2$

J45414:  $\text{KDEC C}_5\text{CO}_2\text{HCHO} \rightarrow 0.83 \text{ MALANHY} + 0.83 \text{ CH}_3 + .17 \text{ MGLYOX} + .17 \text{ HO}_2 + .17 \text{ CO} + .17 \text{ CO}_2$

J45415:  $\text{KDEC TLFUO} \rightarrow \text{ACCOMECCHO} + \text{HO}_2$

J46400:  $\text{KDEC PHENO} \rightarrow 0.71 \text{ MALDALCO}_2\text{H} + 0.71 \text{ GLYOX} + 0.29 \text{ PBZQONE} + \text{HO}_2$

J46403:  $\text{KDEC NDNPHENO} \rightarrow \text{NC}_4\text{DCO}_2\text{H} + \text{HNO}_3 + \text{CO} + \text{CO} + \text{NO}_2$

J46404:  $\text{KDEC BZBIPERO} \rightarrow \text{GLYOX} + \text{HO}_2 + 0.5 \text{ BZFUONE} + 0.5 \text{ BZFUONE}$

J46405: new channel created for nitrophenol decomposition

J46406: new channel created for nitrophenol decomposition

J46412:  $\text{KDEC NNCATECO} \rightarrow \text{NC}_4\text{DCO}_2\text{H} + \text{HCOCO}_2\text{H} + \text{NO}_2$

J46415:  $\text{KDEC NCATECO} \rightarrow \text{NC}_4\text{DCO}_2\text{H} + \text{HCOCO}_2\text{H} + \text{HO}_2$

J46416:  $\text{KDEC PBZQO} \rightarrow \text{C}_5\text{CO}_2\text{OHCO}_3$

J46418:  $\text{KDEC BZBIPERO} \rightarrow \text{GLYOX} + \text{HO}_2 + 0.5 \text{ BZFUONE} + 0.5 \text{ BZFUONE}$

J46419:  $\text{KDEC NBZQO} \rightarrow \text{C}_6\text{CO}_4\text{DB} + \text{NO}_2$

J46422:  $\text{KDEC DNPHEO} \rightarrow \text{NC}_4\text{DCO}_2\text{H} + \text{HCOCO}_2\text{H} + \text{NO}_2$

J46425:  $\text{KDEC BZEMUCO} \rightarrow 0.5 \text{ EPXC}_4\text{DIAL} + .5 \text{ GLYOX} + .5 \text{ HO}_2 + .5 \text{ C}_3\text{DIALO}_2 + .5 \text{ C}_3\text{CO}_2\text{HCHO}$

J46429: new channel

J47401:  $\text{KROPRIM}^*\text{O}_2$  fast reaction  $\text{C}_6\text{H}_5\text{CH}_2\text{O} = \text{BENZAL} + \text{HO}_2$

J47402:  $\text{KROPRIM}^*\text{O}_2$  fast reaction  $\text{C}_6\text{H}_5\text{CH}_2\text{O} = \text{BENZAL} + \text{HO}_2$

J47404:  $\text{KDEC TLBIPERO} \rightarrow 0.6 \text{ GLYOX} + 0.4 \text{ MGLYOX} + \text{HO}_2 + 0.2 \text{ C}_4\text{MDIAL} + 0.2 \text{ C}_5\text{DICARB} + 0.2 \text{ TLFUONE} + 0.2 \text{ BZFUONE} + 0.2 \text{ MALDIAL}$

J47405:  $\text{KDEC TLBIPERO} \rightarrow 0.6 \text{ GLYOX} + 0.4 \text{ MGLYOX} + \text{HO}_2 + 0.2 \text{ C}_4\text{MDIAL} + 0.2 \text{ C}_5\text{DICARB} + 0.2 \text{ TLFUONE} + 0.2 \text{ BZFUONE} + 0.2 \text{ MALDIAL}$

J47407:  $\text{KDEC CRESO} \rightarrow 0.68 \text{ C}_5\text{CO}_2\text{HCHO} + 0.68 \text{ GLYOX} + \text{HO}_2 + 0.32 \text{ PTLQONE}$

J47408a:  $\text{KDEC CRESO} \rightarrow 0.68 \text{ C}_5\text{CO}_2\text{HCHO} + 0.68 \text{ GLYOX} + \text{HO}_2 + 0.32 \text{ PTLQONE}$

J47408b:  $\text{KDEC NCRESO} \rightarrow \text{C}_5\text{CO}_2\text{HCHO} + \text{GLYOX} + \text{NO}_2$

|                                                                                                       |                                                                                                                                           |                                                                                                                                                                                                                                                                                                                        |
|-------------------------------------------------------------------------------------------------------|-------------------------------------------------------------------------------------------------------------------------------------------|------------------------------------------------------------------------------------------------------------------------------------------------------------------------------------------------------------------------------------------------------------------------------------------------------------------------|
| J47409: Using J for 3-methyl-2-nitrophenol.                                                           | J48400: KDEC STYRENO $\rightarrow$ HO2 + HCHO + BEN-ZAL                                                                                   | PH4207b_a01: Quantum yields from Burkholder et al. (2015). HCOCH2O2 decomposes directly to .6 HCHO + .6 CO + .6 HO2 + .2 GLYOX + .2 HOCH2CHO                                                                                                                                                                           |
| J47412: KDEC TLEMUCO $\rightarrow$ 0.5 C3DIALO2 + 0.5 CO2H3CHO + 0.5 EPXC4DIAL + 0.5 MGLYOX + 0.5 HO2 | J40203b: Substituted vinyl alcohol in analogy to CH3CHO photolysis.                                                                       | PH4207c_a01: Quantum yields from Burkholder et al. (2015).                                                                                                                                                                                                                                                             |
| J47417: Using J for 3-methyl-2-nitrophenol.                                                           | J7301: The quantum yields are recommended by Burkholder et al. (2015) for $\lambda > 300\text{nm}$ and used here for the entire spectrum. | PH4211_a01: Assumed in analogy to the main channel for $j(\text{HOCH}_2\text{CHO})$ .                                                                                                                                                                                                                                  |
| J47418: new channel                                                                                   |                                                                                                                                           |                                                                                                                                                                                                                                                                                                                        |
| J47419: Using J for 3-methyl-2-nitrophenol.                                                           |                                                                                                                                           |                                                                                                                                                                                                                                                                                                                        |
| J47420: new channel                                                                                   | PH2100_a01: 2.33 times the gas-phase value                                                                                                | PH4300_a01: $2.33 * k$ from the gas-phase reaction, CH3CO directly reacts with O2 to form CH3CO3                                                                                                                                                                                                                       |
| J47422: KDEC NPTLQO $\rightarrow$ C7CO4DB + NO2                                                       | PH3200_a01: Scaled to J(NO2) so that its lifetime is about 10.5 days, as suggested by Zellner et al. (1990).                              | PH4301_a01: $2.33 * k$ from the gas-phase reaction,                                                                                                                                                                                                                                                                    |
| J47423: KDEC PTLQO $\rightarrow$ C6CO2OHCO3                                                           | PH4200_a01: CH3CHOHO2 is assumed to directly decompose into CH3CHO + HO2                                                                  | PH4302_a01: Following von Kuhlmann et al. (2003), we use $j(\text{CH}_3\text{COCH}_2\text{OH}) = 0.11 * j_{\text{x}}(\text{ip\_CHOH})$ . As an additional factor, the quantum yield of 0.65 is taken from Orlando et al. (1999a). CH3CO reacts with O2 to form OH + HCHO + CO. HOCH2CO reacts with O2 to form HOCH2CO3 |
| J47425: KDEC MNNCATECO $\rightarrow$ NC4MDCO2H + HCOCO2H + NO2                                        | PH4201_a01: COOHOO is not formed but directly dissociates into CO2 + HO2                                                                  |                                                                                                                                                                                                                                                                                                                        |
| J47426: KDEC MNCATECO $\rightarrow$ NC4MDCO2H + HCOCO2H + HO2                                         | PH4202_a01: assumed to be the same as C2H5OOH + hv                                                                                        |                                                                                                                                                                                                                                                                                                                        |
| J47428: KDEC NDNCRESO $\rightarrow$ NC4MDCO2H + HNO3 + CO + CO + NO2                                  | PH4207a_a01: Quantum yields from Burkholder et al. (2015).                                                                                | PH4303_a01: CH3CO reacts with O2 to form OH + HCHO + CO                                                                                                                                                                                                                                                                |
| J47429: KDEC DNCRESO $\rightarrow$ NC4MDCO2H + HCOCO2H + NO2                                          |                                                                                                                                           |                                                                                                                                                                                                                                                                                                                        |

Table 3: Reversible (Henry’s law) equilibria and irreversible (“heterogenous”) uptake

| #           | labels          | reaction                         | rate coefficient                         | reference          |
|-------------|-----------------|----------------------------------|------------------------------------------|--------------------|
| H1000f_a01  | TrAa01Sc        | $O_2 \rightarrow O_2(aq)$        | $k_{\text{exf}}(01, \text{ind}_{O2})$    | see general notes* |
| H1000b_a01  | TrAa01Sc        | $O_2(aq) \rightarrow O_2$        | $k_{\text{exb}}(01, \text{ind}_{O2})$    | see general notes* |
| H10001f_a01 | TrAa01MblScScm  | $O_3 \rightarrow O_3(aq)$        | $k_{\text{exf}}(01, \text{ind}_{O3})$    | see general notes* |
| H10001b_a01 | TrAa01MblScScm  | $O_3(aq) \rightarrow O_3$        | $k_{\text{exb}}(01, \text{ind}_{O3})$    | see general notes* |
| H21000f_a01 | TrAa01Sc        | $OH \rightarrow OH(aq)$          | $k_{\text{exf}}(01, \text{ind}_{OH})$    | see general notes* |
| H21000b_a01 | TrAa01Sc        | $OH(aq) \rightarrow OH$          | $k_{\text{exb}}(01, \text{ind}_{OH})$    | see general notes* |
| H21001f_a01 | TrAa01Sc        | $HO_2 \rightarrow HO_2(aq)$      | $k_{\text{exf}}(01, \text{ind}_{HO2})$   | see general notes* |
| H21001b_a01 | TrAa01Sc        | $HO_2(aq) \rightarrow HO_2$      | $k_{\text{exb}}(01, \text{ind}_{HO2})$   | see general notes* |
| H21002f_a01 | TrAa01MblScScm  | $H_2O_2 \rightarrow H_2O_2(aq)$  | $k_{\text{exf}}(01, \text{ind}_{H2O2})$  | see general notes* |
| H21002b_a01 | TrAa01MblScScm  | $H_2O_2(aq) \rightarrow H_2O_2$  | $k_{\text{exb}}(01, \text{ind}_{H2O2})$  | see general notes* |
| H31000f_a01 | TrAa01ScN       | $NO \rightarrow NO(aq)$          | $k_{\text{exf}}(01, \text{ind}_{NO})$    | see general notes* |
| H31000b_a01 | TrAa01ScN       | $NO(aq) \rightarrow NO$          | $k_{\text{exb}}(01, \text{ind}_{NO})$    | see general notes* |
| H31001f_a01 | TrAa01ScN       | $NO_2 \rightarrow NO_2(aq)$      | $k_{\text{exf}}(01, \text{ind}_{NO2})$   | see general notes* |
| H31001b_a01 | TrAa01ScN       | $NO_2(aq) \rightarrow NO_2$      | $k_{\text{exb}}(01, \text{ind}_{NO2})$   | see general notes* |
| H31002f_a01 | TrAa01ScN       | $NO_3 \rightarrow NO_3(aq)$      | $k_{\text{exf}}(01, \text{ind}_{NO3})$   | see general notes* |
| H31002b_a01 | TrAa01ScN       | $NO_3(aq) \rightarrow NO_3$      | $k_{\text{exb}}(01, \text{ind}_{NO3})$   | see general notes* |
| H32000f_a01 | TrAa01MblScScmN | $NH_3 \rightarrow NH_3(aq)$      | $k_{\text{exf}}(01, \text{ind}_{NH3})$   | see general notes* |
| H32000b_a01 | TrAa01MblScScmN | $NH_3(aq) \rightarrow NH_3$      | $k_{\text{exb}}(01, \text{ind}_{NH3})$   | see general notes* |
| H32002f_a01 | TrAa01ScN       | $HONO \rightarrow HONO(aq)$      | $k_{\text{exf}}(01, \text{ind}_{HONO})$  | see general notes* |
| H32002b_a01 | TrAa01ScN       | $HONO(aq) \rightarrow HONO$      | $k_{\text{exb}}(01, \text{ind}_{HONO})$  | see general notes* |
| H32003f_a01 | TrAa01MblScScmN | $HNO_3 \rightarrow HNO_3(aq)$    | $k_{\text{exf}}(01, \text{ind}_{HNO3})$  | see general notes* |
| H32003b_a01 | TrAa01MblScScmN | $HNO_3(aq) \rightarrow HNO_3$    | $k_{\text{exb}}(01, \text{ind}_{HNO3})$  | see general notes* |
| H32004f_a01 | TrAa01ScN       | $HNO_4 \rightarrow HNO_4(aq)$    | $k_{\text{exf}}(01, \text{ind}_{HNO4})$  | see general notes* |
| H32004b_a01 | TrAa01ScN       | $HNO_4(aq) \rightarrow HNO_4$    | $k_{\text{exb}}(01, \text{ind}_{HNO4})$  | see general notes* |
| H320MSf_a01 | TrAa01MblScScmN | $N_2O_5 \rightarrow N_2O_5(aq)$  | $k_{\text{exf}}(01, \text{ind}_{N2O5})$  | see general notes* |
| H320MSb_a01 | TrAa01MblScScmN | $N_2O_5(aq) \rightarrow N_2O_5$  | $k_{\text{exb}}(01, \text{ind}_{N2O5})$  | see general notes* |
| H41000f_a01 | TrAa01MblScScm  | $CO_2 \rightarrow CO_2(aq)$      | $k_{\text{exf}}(01, \text{ind}_{CO2})$   | see general notes* |
| H41000b_a01 | TrAa01MblScScm  | $CO_2(aq) \rightarrow CO_2$      | $k_{\text{exb}}(01, \text{ind}_{CO2})$   | see general notes* |
| H41001f_a01 | TrAa01ScScm     | $HCHO \rightarrow HCHO(aq)$      | $k_{\text{exf}}(01, \text{ind}_{HCHO})$  | see general notes* |
| H41001b_a01 | TrAa01ScScm     | $HCHO(aq) \rightarrow HCHO$      | $k_{\text{exb}}(01, \text{ind}_{HCHO})$  | see general notes* |
| H41002f_a01 | TrAa01Sc        | $CH_3O_2 \rightarrow CH_3OO(aq)$ | $k_{\text{exf}}(01, \text{ind}_{CH3O2})$ | see general notes* |
| H41002b_a01 | TrAa01Sc        | $CH_3OO(aq) \rightarrow CH_3O_2$ | $k_{\text{exb}}(01, \text{ind}_{CH3O2})$ | see general notes* |
| H41003f_a01 | TrAa01ScScm     | $HCOOH \rightarrow HCOOH(aq)$    | $k_{\text{exf}}(01, \text{ind}_{HCOOH})$ | see general notes* |
| H41003b_a01 | TrAa01ScScm     | $HCOOH(aq) \rightarrow HCOOH$    | $k_{\text{exb}}(01, \text{ind}_{HCOOH})$ | see general notes* |

Table 3: Reversible (Henry's law) equilibria and irreversible ("heterogenous") uptake

| #             | labels       | reaction                                                                                                 | rate coefficient                            | reference          |
|---------------|--------------|----------------------------------------------------------------------------------------------------------|---------------------------------------------|--------------------|
| H41004f_a01   | TrAa01ScScm  | $\text{CH}_3\text{OOH} \rightarrow \text{CH}_3\text{OOH}(\text{aq})$                                     | $k_{\text{exf}}(01, \text{ind\_CH300H})$    | see general notes* |
| H41004b_a01   | TrAa01ScScm  | $\text{CH}_3\text{OOH}(\text{aq}) \rightarrow \text{CH}_3\text{OOH}$                                     | $k_{\text{exb}}(01, \text{ind\_CH300H})$    | see general notes* |
| H41005f_a01   | TrAa01Sc     | $\text{CH}_3\text{OH} \rightarrow \text{CH}_3\text{OH}(\text{aq})$                                       | $k_{\text{exf}}(01, \text{ind\_CH30H})$     | see general notes* |
| H41005b_a01   | TrAa01Sc     | $\text{CH}_3\text{OH}(\text{aq}) \rightarrow \text{CH}_3\text{OH}$                                       | $k_{\text{exb}}(01, \text{ind\_CH30H})$     | see general notes* |
| H41006f_a01   | TrAa01Sc     | $\text{HOCH}_2\text{OH} \rightarrow \text{HOCH}_2\text{OH}(\text{aq})$                                   | $k_{\text{exf}}(01, \text{ind\_HOCH20H})$   | see general notes* |
| H41006b_a01   | TrAa01Sc     | $\text{HOCH}_2\text{OH}(\text{aq}) \rightarrow \text{HOCH}_2\text{OH}$                                   | $k_{\text{exb}}(01, \text{ind\_HOCH20H})$   | see general notes* |
| H41007f_a01   | TrAa01Sc     | $\text{HOCH}_2\text{OOH} \rightarrow \text{HOCH}_2\text{OOH}(\text{aq})$                                 | $k_{\text{exf}}(01, \text{ind\_HOCH200H})$  | see general notes* |
| H41007b_a01   | TrAa01Sc     | $\text{HOCH}_2\text{OOH}(\text{aq}) \rightarrow \text{HOCH}_2\text{OOH}$                                 | $k_{\text{exb}}(01, \text{ind\_HOCH200H})$  | see general notes* |
| H41008f_a01   | TrAa01Sc     | $\text{CO} \rightarrow \text{CO}(\text{aq})$                                                             | $k_{\text{exf}}(01, \text{ind\_CO})$        | see general notes* |
| H41008b_a01   | TrAa01Sc     | $\text{CO}(\text{aq}) \rightarrow \text{CO}$                                                             | $k_{\text{exb}}(01, \text{ind\_CO})$        | see general notes* |
| H41009MSf_a01 | TrAa01ScN    | $\text{CH}_3\text{ONO}_2 \rightarrow \text{CH}_3\text{ONO}_2(\text{aq})$                                 | $k_{\text{exf}}(01, \text{ind\_CH3N03})$    | see general notes* |
| H41010MSb_a01 | TrAa01ScN    | $\text{CH}_3\text{ONO}_2(\text{aq}) \rightarrow \text{CH}_3\text{ONO}_2$                                 | $k_{\text{exb}}(01, \text{ind\_CH3N03})$    | see general notes* |
| H42000f_a01   | TrAa01ScScmC | $\text{CH}_3\text{COOH} \rightarrow \text{CH}_3\text{COOH}(\text{aq})$                                   | $k_{\text{exf}}(01, \text{ind\_CH3C02H})$   | see general notes* |
| H42000b_a01   | TrAa01ScScmC | $\text{CH}_3\text{COOH}(\text{aq}) \rightarrow \text{CH}_3\text{COOH}$                                   | $k_{\text{exb}}(01, \text{ind\_CH3C02H})$   | see general notes* |
| H42001f_a01   | TrAa01ScC    | $\text{CH}_3\text{CHO} \rightarrow \text{CH}_3\text{CHO}(\text{aq})$                                     | $k_{\text{exf}}(01, \text{ind\_CH3CHO})$    | see general notes* |
| H42001b_a01   | TrAa01ScC    | $\text{CH}_3\text{CHO}(\text{aq}) \rightarrow \text{CH}_3\text{CHO}$                                     | $k_{\text{exb}}(01, \text{ind\_CH3CHO})$    | see general notes* |
| H42002f_a01   | TrAa01ScCN   | $\text{PAN} \rightarrow \text{PAN}(\text{aq})$                                                           | $k_{\text{exf}}(01, \text{ind\_PAN})$       | see general notes* |
| H42002b_a01   | TrAa01ScCN   | $\text{PAN}(\text{aq}) \rightarrow \text{PAN}$                                                           | $k_{\text{exb}}(01, \text{ind\_PAN})$       | see general notes* |
| H42003f_a01   | TrAa01ScC    | $\text{C}_2\text{H}_5\text{OH} \rightarrow \text{CH}_3\text{CH}_2\text{OH}(\text{aq})$                   | $k_{\text{exf}}(01, \text{ind\_C2H50H})$    | see general notes* |
| H42003b_a01   | TrAa01ScC    | $\text{CH}_3\text{CH}_2\text{OH}(\text{aq}) \rightarrow \text{C}_2\text{H}_5\text{OH}$                   | $k_{\text{exb}}(01, \text{ind\_C2H50H})$    | see general notes* |
| H42004f_a01   | TrAa01ScC    | $\text{ETHGLY} \rightarrow \text{ETHGLY}(\text{aq})$                                                     | $k_{\text{exf}}(01, \text{ind\_ETHGLY})$    | see general notes* |
| H42004b_a01   | TrAa01ScC    | $\text{ETHGLY}(\text{aq}) \rightarrow \text{ETHGLY}$                                                     | $k_{\text{exb}}(01, \text{ind\_ETHGLY})$    | see general notes* |
| H42006f_a01   | TrAa01ScC    | $\text{CH}_3\text{C}(\text{O})\text{OO} \rightarrow \text{CH}_3\text{COOO}(\text{aq})$                   | $k_{\text{exf}}(01, \text{ind\_CH3C03})$    | see general notes* |
| H42006b_a01   | TrAa01ScC    | $\text{CH}_3\text{COOO}(\text{aq}) \rightarrow \text{CH}_3\text{C}(\text{O})\text{OO}$                   | $k_{\text{exb}}(01, \text{ind\_CH3C03})$    | see general notes* |
| H42007f_a01   | TrAa01ScC    | $\text{HOCH}_2\text{CHO} \rightarrow \text{CH}_2\text{OHCHO}(\text{aq})$                                 | $k_{\text{exf}}(01, \text{ind\_HOCH2CHO})$  | see general notes* |
| H42007b_a01   | TrAa01ScC    | $\text{CH}_2\text{OHCHO}(\text{aq}) \rightarrow \text{HOCH}_2\text{CHO}$                                 | $k_{\text{exb}}(01, \text{ind\_HOCH2CHO})$  | see general notes* |
| H42008f_a01   | TrAa01ScC    | $\text{GLYOX} \rightarrow \text{GLYOX}(\text{aq})$                                                       | $k_{\text{exf}}(01, \text{ind\_GLYOX})$     | see general notes* |
| H42008b_a01   | TrAa01ScC    | $\text{GLYOX}(\text{aq}) \rightarrow \text{GLYOX}$                                                       | $k_{\text{exb}}(01, \text{ind\_GLYOX})$     | see general notes* |
| H42009f_a01   | TrAa01ScC    | $\text{CH}_3\text{C}(\text{O})\text{OOH} \rightarrow \text{CH}_3\text{C}(\text{O})\text{OOH}(\text{aq})$ | $k_{\text{exf}}(01, \text{ind\_CH3C03H})$   | see general notes* |
| H42009b_a01   | TrAa01ScC    | $\text{CH}_3\text{C}(\text{O})\text{OOH}(\text{aq}) \rightarrow \text{CH}_3\text{C}(\text{O})\text{OOH}$ | $k_{\text{exb}}(01, \text{ind\_CH3C03H})$   | see general notes* |
| H42010f_a01   | TrAa01ScC    | $\text{HOCH}_2\text{CO}_3\text{H} \rightarrow \text{HOCH}_2\text{CO}_3\text{H}(\text{aq})$               | $k_{\text{exf}}(01, \text{ind\_HOCH2C03H})$ | see general notes* |
| H42010b_a01   | TrAa01ScC    | $\text{HOCH}_2\text{CO}_3\text{H}(\text{aq}) \rightarrow \text{HOCH}_2\text{CO}_3\text{H}$               | $k_{\text{exb}}(01, \text{ind\_HOCH2C03H})$ | see general notes* |
| H42011f_a01   | TrAa01ScC    | $\text{C}_2\text{H}_5\text{OOH} \rightarrow \text{C}_2\text{H}_5\text{OOH}(\text{aq})$                   | $k_{\text{exf}}(01, \text{ind\_C2H500H})$   | see general notes* |
| H42011b_a01   | TrAa01ScC    | $\text{C}_2\text{H}_5\text{OOH}(\text{aq}) \rightarrow \text{C}_2\text{H}_5\text{OOH}$                   | $k_{\text{exb}}(01, \text{ind\_C2H500H})$   | see general notes* |
| H42012f_a01   | TrAa01ScC    | $\text{HOCCOOH} \rightarrow \text{HOCCOOH}(\text{aq})$                                                   | $k_{\text{exf}}(01, \text{ind\_H00CC00H})$  | see general notes* |

Table 3: Reversible (Henry's law) equilibria and irreversible ("heterogenous") uptake

| #           | labels     | reaction                                                                                                   | rate coefficient                                                    | reference          |
|-------------|------------|------------------------------------------------------------------------------------------------------------|---------------------------------------------------------------------|--------------------|
| H42012b_a01 | TrAa01ScC  | $\text{HOOC}\text{COOH}(\text{aq}) \rightarrow \text{HOOC}\text{COOH}$                                     | $k_{\text{exb}}(01, \text{ind\_HOOC}\text{COOH})$                   | see general notes* |
| H42013f_a01 | TrAa01ScC  | $\text{HOOC}\text{H}_2\text{CO}_2\text{H} \rightarrow \text{HOOC}\text{H}_2\text{CO}_2\text{H}(\text{aq})$ | $k_{\text{exf}}(01, \text{ind\_HOOC}\text{H}_2\text{CO}_2\text{H})$ | see general notes* |
| H42013b_a01 | TrAa01ScC  | $\text{HOOC}\text{H}_2\text{CO}_2\text{H}(\text{aq}) \rightarrow \text{HOOC}\text{H}_2\text{CO}_2\text{H}$ | $k_{\text{exb}}(01, \text{ind\_HOOC}\text{H}_2\text{CO}_2\text{H})$ | see general notes* |
| H42014f_a01 | TrAa01ScC  | $\text{HOCH}_2\text{CO}_2\text{H} \rightarrow \text{HOCH}_2\text{CO}_2\text{H}(\text{aq})$                 | $k_{\text{exf}}(01, \text{ind\_HOCH}_2\text{CO}_2\text{H})$         | see general notes* |
| H42014b_a01 | TrAa01ScC  | $\text{HOCH}_2\text{CO}_2\text{H}(\text{aq}) \rightarrow \text{HOCH}_2\text{CO}_2\text{H}$                 | $k_{\text{exb}}(01, \text{ind\_HOCH}_2\text{CO}_2\text{H})$         | see general notes* |
| H42015f_a01 | TrAa01ScC  | $\text{HCOC}\text{O}_2\text{H} \rightarrow \text{CHOC}\text{OOH}(\text{aq})$                               | $k_{\text{exf}}(01, \text{ind\_HCOC}\text{O}_2\text{H})$            | see general notes* |
| H42015b_a01 | TrAa01ScC  | $\text{CHOC}\text{OOH}(\text{aq}) \rightarrow \text{HCOC}\text{O}_2\text{H}$                               | $k_{\text{exb}}(01, \text{ind\_HCOC}\text{O}_2\text{H})$            | see general notes* |
| H42017f_a01 | TrAa01ScCN | $\text{C}_2\text{H}_5\text{ONO}_2 \rightarrow \text{C}_2\text{H}_5\text{ONO}_2(\text{aq})$                 | $k_{\text{exf}}(01, \text{ind\_C}_2\text{H}_5\text{NO}_3)$          | see general notes* |
| H42017b_a01 | TrAa01ScCN | $\text{C}_2\text{H}_5\text{ONO}_2(\text{aq}) \rightarrow \text{C}_2\text{H}_5\text{ONO}_2$                 | $k_{\text{exb}}(01, \text{ind\_C}_2\text{H}_5\text{NO}_3)$          | see general notes* |
| H42018f_a01 | TrAa01ScCN | $\text{CH}_3\text{CN} \rightarrow \text{CH}_3\text{CN}(\text{aq})$                                         | $k_{\text{exf}}(01, \text{ind\_CH}_3\text{CN})$                     | see general notes* |
| H42018b_a01 | TrAa01ScCN | $\text{CH}_3\text{CN}(\text{aq}) \rightarrow \text{CH}_3\text{CN}$                                         | $k_{\text{exb}}(01, \text{ind\_CH}_3\text{CN})$                     | see general notes* |
| H42019f_a01 | TrAa01ScC  | $\text{HOCH}_2\text{CHOHOH} \rightarrow \text{CH}_2\text{OHCHOHOH}(\text{aq})$                             | $k_{\text{exf}}(01, \text{ind\_HOCH}_2\text{CHOHOH})$               | see general notes* |
| H42019b_a01 | TrAa01ScC  | $\text{CH}_2\text{OHCHOHOH}(\text{aq}) \rightarrow \text{HOCH}_2\text{CHOHOH}$                             | $k_{\text{exb}}(01, \text{ind\_HOCH}_2\text{CHOHOH})$               | see general notes* |
| H42020f_a01 | TrAa01ScC  | $\text{CH}_3\text{CHOHOH} \rightarrow \text{CH}_3\text{CHOHOH}(\text{aq})$                                 | $k_{\text{exf}}(01, \text{ind\_CH}_3\text{CHOHOH})$                 | see general notes* |
| H42020b_a01 | TrAa01ScC  | $\text{CH}_3\text{CHOHOH}(\text{aq}) \rightarrow \text{CH}_3\text{CHOHOH}$                                 | $k_{\text{exb}}(01, \text{ind\_CH}_3\text{CHOHOH})$                 | see general notes* |
| H42021f_a01 | TrAa01ScC  | $\text{CHOHOHCOOH} \rightarrow \text{CHOOHOHCOOH}(\text{aq})$                                              | $k_{\text{exf}}(01, \text{ind\_CHOHOHCOOH})$                        | see general notes* |
| H42021b_a01 | TrAa01ScC  | $\text{CHOOHOHCOOH}(\text{aq}) \rightarrow \text{CHOHOHCOOH}$                                              | $k_{\text{exb}}(01, \text{ind\_CHOHOHCOOH})$                        | see general notes* |
| H42022f_a01 | TrAa01ScC  | $\text{CHOHOHCHOHOH} \rightarrow \text{CHOHOHCHOHOH}(\text{aq})$                                           | $k_{\text{exf}}(01, \text{ind\_CHOHOHCHOHOH})$                      | see general notes* |
| H42022b_a01 | TrAa01ScC  | $\text{CHOHOHCHOHOH}(\text{aq}) \rightarrow \text{CHOHOHCHOHOH}$                                           | $k_{\text{exb}}(01, \text{ind\_CHOHOHCHOHOH})$                      | see general notes* |
| H42023f_a01 | TrAa01ScC  | $\text{HOOC}\text{H}_2\text{CHO} \rightarrow \text{CH}_2\text{OOHCHO}(\text{aq})$                          | $k_{\text{exf}}(01, \text{ind\_HOOC}\text{H}_2\text{CHO})$          | see general notes* |
| H42023b_a01 | TrAa01ScC  | $\text{CH}_2\text{OOHCHO}(\text{aq}) \rightarrow \text{HOOC}\text{H}_2\text{CHO}$                          | $k_{\text{exb}}(01, \text{ind\_HOOC}\text{H}_2\text{CHO})$          | see general notes* |
| H42024f_a01 | TrAa01ScC  | $\text{CHOCHOHOH} \rightarrow \text{CHOCHOHOH}(\text{aq})$                                                 | $k_{\text{exf}}(01, \text{ind\_CHOCHOHOH})$                         | see general notes* |
| H42024b_a01 | TrAa01ScC  | $\text{CHOCHOHOH}(\text{aq}) \rightarrow \text{CHOCHOHOH}$                                                 | $k_{\text{exb}}(01, \text{ind\_CHOCHOHOH})$                         | see general notes* |
| H42025f_a01 | TrAa01ScC  | $\text{HOOC}\text{H}_2\text{CHOHOH} \rightarrow \text{HOOC}\text{H}_2\text{CHOHOH}(\text{aq})$             | $k_{\text{exf}}(01, \text{ind\_HOOC}\text{H}_2\text{CHOHOH})$       | see general notes* |
| H42025b_a01 | TrAa01ScC  | $\text{HOOC}\text{H}_2\text{CHOHOH}(\text{aq}) \rightarrow \text{HOOC}\text{H}_2\text{CHOHOH}$             | $k_{\text{exb}}(01, \text{ind\_HOOC}\text{H}_2\text{CHOHOH})$       | see general notes* |
| H42026f_a01 | TrAa01ScC  | $\text{CH}_2\text{CO} \rightarrow \text{CH}_2\text{CO}(\text{aq})$                                         | $k_{\text{exf}}(01, \text{ind\_CH}_2\text{CO})$                     | see general notes* |
| H42026b_a01 | TrAa01ScC  | $\text{CH}_2\text{CO}(\text{aq}) \rightarrow \text{CH}_2\text{CO}$                                         | $k_{\text{exb}}(01, \text{ind\_CH}_2\text{CO})$                     | see general notes* |
| H42027f_a01 | TrAa01ScC  | $\text{CH}_3\text{CHOHOOH} \rightarrow \text{CH}_3\text{CHOHOOH}(\text{aq})$                               | $k_{\text{exf}}(01, \text{ind\_CH}_3\text{CHOHOOH})$                | see general notes* |
| H42027b_a01 | TrAa01ScC  | $\text{CH}_3\text{CHOHOOH}(\text{aq}) \rightarrow \text{CH}_3\text{CHOHOOH}$                               | $k_{\text{exb}}(01, \text{ind\_CH}_3\text{CHOHOOH})$                | see general notes* |
| H42028f_a01 | TrAa01ScCN | $\text{ETHOHNO}_3 \rightarrow \text{ETHOHNO}_3(\text{aq})$                                                 | $k_{\text{exf}}(01, \text{ind\_ETHOHNO}_3)$                         | see general notes* |
| H42028b_a01 | TrAa01ScCN | $\text{ETHOHNO}_3(\text{aq}) \rightarrow \text{ETHOHNO}_3$                                                 | $k_{\text{exb}}(01, \text{ind\_ETHOHNO}_3)$                         | see general notes* |

Table 3: Reversible (Henry’s law) equilibria and irreversible (“heterogenous”) uptake

| #           | labels     | reaction                                                                                                       | rate coefficient                                             | reference          |
|-------------|------------|----------------------------------------------------------------------------------------------------------------|--------------------------------------------------------------|--------------------|
| H42029f_a01 | TrAa01ScC  | $\text{HCOCO}_3\text{H} \rightarrow \text{HCOCO}_3\text{H}(\text{aq})$                                         | $k_{\text{exf}}(01, \text{ind\_HCOCO}_3\text{H})$            | see general notes* |
| H42029b_a01 | TrAa01ScC  | $\text{HCOCO}_3\text{H}(\text{aq}) \rightarrow \text{HCOCO}_3\text{H}$                                         | $k_{\text{exb}}(01, \text{ind\_HCOCO}_3\text{H})$            | see general notes* |
| H42030f_a01 | TrAa01ScC  | $\text{HOOCH}_2\text{CO}_3\text{H} \rightarrow \text{HOOCH}_2\text{CO}_3\text{H}(\text{aq})$                   | $k_{\text{exf}}(01, \text{ind\_HOOCH}_2\text{CO}_3\text{H})$ | see general notes* |
| H42030b_a01 | TrAa01ScC  | $\text{HOOCH}_2\text{CO}_3\text{H}(\text{aq}) \rightarrow \text{HOOCH}_2\text{CO}_3\text{H}$                   | $k_{\text{exb}}(01, \text{ind\_HOOCH}_2\text{CO}_3\text{H})$ | see general notes* |
| H42031f_a01 | TrAa01ScC  | $\text{HYETHO}_2\text{H} \rightarrow \text{HYETHO}_2\text{H}(\text{aq})$                                       | $k_{\text{exf}}(01, \text{ind\_HYETHO}_2\text{H})$           | see general notes* |
| H42031b_a01 | TrAa01ScC  | $\text{HYETHO}_2\text{H}(\text{aq}) \rightarrow \text{HYETHO}_2\text{H}$                                       | $k_{\text{exb}}(01, \text{ind\_HYETHO}_2\text{H})$           | see general notes* |
| H42032f_a01 | TrAa01ScCN | $\text{PHAN} \rightarrow \text{PHAN}(\text{aq})$                                                               | $k_{\text{exf}}(01, \text{ind\_PHAN})$                       | see general notes* |
| H42032b_a01 | TrAa01ScCN | $\text{PHAN}(\text{aq}) \rightarrow \text{PHAN}$                                                               | $k_{\text{exb}}(01, \text{ind\_PHAN})$                       | see general notes* |
| H43000f_a01 | TrAa01ScC  | $\text{CH}_3\text{COCH}_3 \rightarrow \text{CH}_3\text{COCH}_3(\text{aq})$                                     | $k_{\text{exf}}(01, \text{ind\_CH}_3\text{COCH}_3)$          | see general notes* |
| H43000b_a01 | TrAa01ScC  | $\text{CH}_3\text{COCH}_3(\text{aq}) \rightarrow \text{CH}_3\text{COCH}_3$                                     | $k_{\text{exb}}(01, \text{ind\_CH}_3\text{COCH}_3)$          | see general notes* |
| H43001f_a01 | TrAa01ScC  | $\text{MGLYOX} \rightarrow \text{CH}_3\text{C}(\text{O})\text{CHO}(\text{aq})$                                 | $k_{\text{exf}}(01, \text{ind\_MGLYOX})$                     | see general notes* |
| H43001b_a01 | TrAa01ScC  | $\text{CH}_3\text{C}(\text{O})\text{CHO}(\text{aq}) \rightarrow \text{MGLYOX}$                                 | $k_{\text{exb}}(01, \text{ind\_MGLYOX})$                     | see general notes* |
| H43002f_a01 | TrAa01ScC  | $\text{CH}_3\text{COCO}_2\text{H} \rightarrow \text{CH}_3\text{COCO}_2\text{H}(\text{aq})$                     | $k_{\text{exf}}(01, \text{ind\_CH}_3\text{COCO}_2\text{H})$  | see general notes* |
| H43002b_a01 | TrAa01ScC  | $\text{CH}_3\text{COCO}_2\text{H}(\text{aq}) \rightarrow \text{CH}_3\text{COCO}_2\text{H}$                     | $k_{\text{exb}}(01, \text{ind\_CH}_3\text{COCO}_2\text{H})$  | see general notes* |
| H43003f_a01 | TrAa01ScC  | $\text{CH}_3\text{COCHOHOH} \rightarrow \text{CH}_3\text{COCHOHOH}(\text{aq})$                                 | $k_{\text{exf}}(01, \text{ind\_CH}_3\text{COCHOHOH})$        | see general notes* |
| H43003b_a01 | TrAa01ScC  | $\text{CH}_3\text{COCHOHOH}(\text{aq}) \rightarrow \text{CH}_3\text{COCHOHOH}$                                 | $k_{\text{exb}}(01, \text{ind\_CH}_3\text{COCHOHOH})$        | see general notes* |
| H43005f_a01 | TrAa01ScC  | $\text{IPROPOL} \rightarrow \text{IPROPOL}(\text{aq})$                                                         | $k_{\text{exf}}(01, \text{ind\_IPROPOL})$                    | see general notes* |
| H43005b_a01 | TrAa01ScC  | $\text{IPROPOL}(\text{aq}) \rightarrow \text{IPROPOL}$                                                         | $k_{\text{exb}}(01, \text{ind\_IPROPOL})$                    | see general notes* |
| H43006f_a01 | TrAa01ScC  | $\text{CH}_3\text{COCH}_2\text{O}_2\text{H} \rightarrow \text{CH}_3\text{COCH}_2\text{O}_2\text{H}(\text{aq})$ | $k_{\text{exf}}(01, \text{ind\_HYPERACET})$                  | see general notes* |
| H43006b_a01 | TrAa01ScC  | $\text{CH}_3\text{COCH}_2\text{O}_2\text{H}(\text{aq}) \rightarrow \text{CH}_3\text{COCH}_2\text{O}_2\text{H}$ | $k_{\text{exb}}(01, \text{ind\_HYPERACET})$                  | see general notes* |
| H43007f_a01 | TrAa01ScC  | $\text{iC}_3\text{H}_7\text{OOH} \rightarrow \text{iC}_3\text{H}_7\text{OOH}(\text{aq})$                       | $k_{\text{exf}}(01, \text{ind\_IC}_3\text{H}_7\text{OOH})$   | see general notes* |
| H43007b_a01 | TrAa01ScC  | $\text{iC}_3\text{H}_7\text{OOH}(\text{aq}) \rightarrow \text{iC}_3\text{H}_7\text{OOH}$                       | $k_{\text{exb}}(01, \text{ind\_IC}_3\text{H}_7\text{OOH})$   | see general notes* |
| H43008f_a01 | TrAa01ScC  | $\text{HCOCOCH}_2\text{OOH} \rightarrow \text{HCOCOCH}_2\text{OOH}(\text{aq})$                                 | $k_{\text{exf}}(01, \text{ind\_ALCOCH}_2\text{OOH})$         | see general notes* |
| H43008b_a01 | TrAa01ScC  | $\text{HCOCOCH}_2\text{OOH}(\text{aq}) \rightarrow \text{HCOCOCH}_2\text{OOH}$                                 | $k_{\text{exb}}(01, \text{ind\_ALCOCH}_2\text{OOH})$         | see general notes* |
| H43009f_a01 | TrAa01ScC  | $\text{C}_3\text{OH13CO} \rightarrow \text{C}_3\text{OH13CO}(\text{aq})$                                       | $k_{\text{exf}}(01, \text{ind\_C}_3\text{OH13CO})$           | see general notes* |
| H43009b_a01 | TrAa01ScC  | $\text{C}_3\text{OH13CO}(\text{aq}) \rightarrow \text{C}_3\text{OH13CO}$                                       | $k_{\text{exb}}(01, \text{ind\_C}_3\text{OH13CO})$           | see general notes* |
| H43010f_a01 | TrAa01ScC  | $\text{HCOCOCHO} \rightarrow \text{HCOCOCHO}(\text{aq})$                                                       | $k_{\text{exf}}(01, \text{ind\_C}_3\text{CO})$               | see general notes* |
| H43010b_a01 | TrAa01ScC  | $\text{HCOCOCHO}(\text{aq}) \rightarrow \text{HCOCOCHO}$                                                       | $k_{\text{exb}}(01, \text{ind\_C}_3\text{CO})$               | see general notes* |
| H43011f_a01 | TrAa01ScC  | $\text{C}_3\text{DIALOOH} \rightarrow \text{C}_3\text{DIALOOH}(\text{aq})$                                     | $k_{\text{exf}}(01, \text{ind\_C}_3\text{DIALOOH})$          | see general notes* |
| H43011b_a01 | TrAa01ScC  | $\text{C}_3\text{DIALOOH}(\text{aq}) \rightarrow \text{C}_3\text{DIALOOH}$                                     | $k_{\text{exb}}(01, \text{ind\_C}_3\text{DIALOOH})$          | see general notes* |
| H43012f_a01 | TrAa01ScCN | $\text{C}_3\text{PAN1} \rightarrow \text{C}_3\text{PAN1}(\text{aq})$                                           | $k_{\text{exf}}(01, \text{ind\_C}_3\text{PAN1})$             | see general notes* |
| H43012b_a01 | TrAa01ScCN | $\text{C}_3\text{PAN1}(\text{aq}) \rightarrow \text{C}_3\text{PAN1}$                                           | $k_{\text{exb}}(01, \text{ind\_C}_3\text{PAN1})$             | see general notes* |
| H43013f_a01 | TrAa01ScCN | $\text{C}_3\text{PAN2} \rightarrow \text{C}_3\text{PAN2}(\text{aq})$                                           | $k_{\text{exf}}(01, \text{ind\_C}_3\text{PAN2})$             | see general notes* |
| H43013b_a01 | TrAa01ScCN | $\text{C}_3\text{PAN2}(\text{aq}) \rightarrow \text{C}_3\text{PAN2}$                                           | $k_{\text{exb}}(01, \text{ind\_C}_3\text{PAN2})$             | see general notes* |
| H43014f_a01 | TrAa01ScC  | $\text{CH}_3\text{CHCO} \rightarrow \text{CH}_3\text{CHCO}(\text{aq})$                                         | $k_{\text{exf}}(01, \text{ind\_CH}_3\text{CHCO})$            | see general notes* |



Table 3: Reversible (Henry's law) equilibria and irreversible ("heterogenous") uptake

| #           | labels     | reaction                                                                                                     | rate coefficient                                                        | reference          |
|-------------|------------|--------------------------------------------------------------------------------------------------------------|-------------------------------------------------------------------------|--------------------|
| H43014b_a01 | TrAa01ScC  | $\text{CH}_3\text{CHCO}(\text{aq}) \rightarrow \text{CH}_3\text{CHCO}$                                       | $k_{\text{exb}}(01, \text{ind\_CH}_3\text{CHCO})$                       | see general notes* |
| H43015f_a01 | TrAa01ScCN | $\text{CH}_3\text{COCH}_2\text{OONO}_2 \rightarrow \text{CH}_3\text{COCH}_2\text{OONO}_2(\text{aq})$         | $k_{\text{exf}}(01, \text{ind\_CH}_3\text{COCH}_2\text{O}_2\text{N}_2)$ | see general notes* |
| H43015b_a01 | TrAa01ScCN | $\text{CH}_3\text{COCH}_2\text{OONO}_2(\text{aq}) \rightarrow \text{CH}_3\text{COCH}_2\text{OONO}_2$         | $k_{\text{exb}}(01, \text{ind\_CH}_3\text{COCH}_2\text{O}_2\text{N}_2)$ | see general notes* |
| H43016f_a01 | TrAa01ScC  | $\text{CH}_3\text{COCO}_3\text{H} \rightarrow \text{CH}_3\text{COCO}_3\text{H}(\text{aq})$                   | $k_{\text{exf}}(01, \text{ind\_CH}_3\text{COCO}_3\text{H})$             | see general notes* |
| H43016b_a01 | TrAa01ScC  | $\text{CH}_3\text{COCO}_3\text{H}(\text{aq}) \rightarrow \text{CH}_3\text{COCO}_3\text{H}$                   | $k_{\text{exb}}(01, \text{ind\_CH}_3\text{COCO}_3\text{H})$             | see general notes* |
| H43017f_a01 | TrAa01ScC  | $\text{HCOCH}_2\text{CHO} \rightarrow \text{HCOCH}_2\text{CHO}(\text{aq})$                                   | $k_{\text{exf}}(01, \text{ind\_HCOCH}_2\text{CHO})$                     | see general notes* |
| H43017b_a01 | TrAa01ScC  | $\text{HCOCH}_2\text{CHO}(\text{aq}) \rightarrow \text{HCOCH}_2\text{CHO}$                                   | $k_{\text{exb}}(01, \text{ind\_HCOCH}_2\text{CHO})$                     | see general notes* |
| H43018f_a01 | TrAa01ScC  | $\text{HCOCH}_2\text{CO}_2\text{H} \rightarrow \text{HCOCH}_2\text{CO}_2\text{H}(\text{aq})$                 | $k_{\text{exf}}(01, \text{ind\_HCOCH}_2\text{CO}_2\text{H})$            | see general notes* |
| H43018b_a01 | TrAa01ScC  | $\text{HCOCH}_2\text{CO}_2\text{H}(\text{aq}) \rightarrow \text{HCOCH}_2\text{CO}_2\text{H}$                 | $k_{\text{exb}}(01, \text{ind\_HCOCH}_2\text{CO}_2\text{H})$            | see general notes* |
| H43019f_a01 | TrAa01ScC  | $\text{HCOCH}_2\text{CO}_3\text{H} \rightarrow \text{HCOCH}_2\text{CO}_3\text{H}(\text{aq})$                 | $k_{\text{exf}}(01, \text{ind\_HCOCH}_2\text{CO}_3\text{H})$            | see general notes* |
| H43019b_a01 | TrAa01ScC  | $\text{HCOCH}_2\text{CO}_3\text{H}(\text{aq}) \rightarrow \text{HCOCH}_2\text{CO}_3\text{H}$                 | $k_{\text{exb}}(01, \text{ind\_HCOCH}_2\text{CO}_3\text{H})$            | see general notes* |
| H43020f_a01 | TrAa01ScC  | $\text{HCOCOCH}_2\text{OOH} \rightarrow \text{HCOCOCH}_2\text{OOH}(\text{aq})$                               | $k_{\text{exf}}(01, \text{ind\_HCOCOCH}_2\text{OOH})$                   | see general notes* |
| H43020b_a01 | TrAa01ScC  | $\text{HCOCOCH}_2\text{OOH}(\text{aq}) \rightarrow \text{HCOCOCH}_2\text{OOH}$                               | $k_{\text{exb}}(01, \text{ind\_HCOCOCH}_2\text{OOH})$                   | see general notes* |
| H43021f_a01 | TrAa01ScC  | $\text{HCOCOHC}_3\text{O}_3\text{H} \rightarrow \text{HCOCOHC}_3\text{O}_3\text{H}(\text{aq})$               | $k_{\text{exf}}(01, \text{ind\_HCOCOHC}_3\text{O}_3\text{H})$           | see general notes* |
| H43021b_a01 | TrAa01ScC  | $\text{HCOCOHC}_3\text{O}_3\text{H}(\text{aq}) \rightarrow \text{HCOCOHC}_3\text{O}_3\text{H}$               | $k_{\text{exb}}(01, \text{ind\_HCOCOHC}_3\text{O}_3\text{H})$           | see general notes* |
| H43022f_a01 | TrAa01ScCN | $\text{HCOCOHPAN} \rightarrow \text{HCOCOHPAN}(\text{aq})$                                                   | $k_{\text{exf}}(01, \text{ind\_HCOCOHPAN})$                             | see general notes* |
| H43022b_a01 | TrAa01ScCN | $\text{HCOCOHPAN}(\text{aq}) \rightarrow \text{HCOCOHPAN}$                                                   | $k_{\text{exb}}(01, \text{ind\_HCOCOHPAN})$                             | see general notes* |
| H43023f_a01 | TrAa01ScC  | $\text{HOC}_2\text{H}_4\text{CO}_2\text{H} \rightarrow \text{HOC}_2\text{H}_4\text{CO}_2\text{H}(\text{aq})$ | $k_{\text{exf}}(01, \text{ind\_HOC}_2\text{H}_4\text{CO}_2\text{H})$    | see general notes* |
| H43023b_a01 | TrAa01ScC  | $\text{HOC}_2\text{H}_4\text{CO}_2\text{H}(\text{aq}) \rightarrow \text{HOC}_2\text{H}_4\text{CO}_2\text{H}$ | $k_{\text{exb}}(01, \text{ind\_HOC}_2\text{H}_4\text{CO}_2\text{H})$    | see general notes* |
| H43024f_a01 | TrAa01ScC  | $\text{HOC}_2\text{H}_4\text{CO}_3\text{H} \rightarrow \text{HOC}_2\text{H}_4\text{CO}_3\text{H}(\text{aq})$ | $k_{\text{exf}}(01, \text{ind\_HOC}_2\text{H}_4\text{CO}_3\text{H})$    | see general notes* |
| H43024b_a01 | TrAa01ScC  | $\text{HOC}_2\text{H}_4\text{CO}_3\text{H}(\text{aq}) \rightarrow \text{HOC}_2\text{H}_4\text{CO}_3\text{H}$ | $k_{\text{exb}}(01, \text{ind\_HOC}_2\text{H}_4\text{CO}_3\text{H})$    | see general notes* |
| H43025f_a01 | TrAa01ScC  | $\text{HOCH}_2\text{COCH}_2\text{OOH} \rightarrow \text{HOCH}_2\text{COCH}_2\text{OOH}(\text{aq})$           | $k_{\text{exf}}(01, \text{ind\_HOCH}_2\text{COCH}_2\text{OOH})$         | see general notes* |
| H43025b_a01 | TrAa01ScC  | $\text{HOCH}_2\text{COCH}_2\text{OOH}(\text{aq}) \rightarrow \text{HOCH}_2\text{COCH}_2\text{OOH}$           | $k_{\text{exb}}(01, \text{ind\_HOCH}_2\text{COCH}_2\text{OOH})$         | see general notes* |
| H43026f_a01 | TrAa01ScC  | $\text{HOCH}_2\text{COCHO} \rightarrow \text{HOCH}_2\text{COCHO}(\text{aq})$                                 | $k_{\text{exf}}(01, \text{ind\_HOCH}_2\text{COCHO})$                    | see general notes* |
| H43026b_a01 | TrAa01ScC  | $\text{HOCH}_2\text{COCHO}(\text{aq}) \rightarrow \text{HOCH}_2\text{COCHO}$                                 | $k_{\text{exb}}(01, \text{ind\_HOCH}_2\text{COCHO})$                    | see general notes* |
| H43027f_a01 | TrAa01ScC  | $\text{HYPROPO}_2\text{H} \rightarrow \text{HYPROPO}_2\text{H}(\text{aq})$                                   | $k_{\text{exf}}(01, \text{ind\_HYPROPO}_2\text{H})$                     | see general notes* |
| H43027b_a01 | TrAa01ScC  | $\text{HYPROPO}_2\text{H}(\text{aq}) \rightarrow \text{HYPROPO}_2\text{H}$                                   | $k_{\text{exb}}(01, \text{ind\_HYPROPO}_2\text{H})$                     | see general notes* |
| H43028f_a01 | TrAa01ScC  | $\text{METACETHO} \rightarrow \text{METACETHO}(\text{aq})$                                                   | $k_{\text{exf}}(01, \text{ind\_METACETHO})$                             | see general notes* |
| H43028b_a01 | TrAa01ScC  | $\text{METACETHO}(\text{aq}) \rightarrow \text{METACETHO}$                                                   | $k_{\text{exb}}(01, \text{ind\_METACETHO})$                             | see general notes* |
| H43029f_a01 | TrAa01ScCN | $\text{NOA} \rightarrow \text{NOA}(\text{aq})$                                                               | $k_{\text{exf}}(01, \text{ind\_NOA})$                                   | see general notes* |
| H43029b_a01 | TrAa01ScCN | $\text{NOA}(\text{aq}) \rightarrow \text{NOA}$                                                               | $k_{\text{exb}}(01, \text{ind\_NOA})$                                   | see general notes* |

Table 3: Reversible (Henry's law) equilibria and irreversible ("heterogenous") uptake

| #           | labels     | reaction                                                                                           | rate coefficient                             | reference          |
|-------------|------------|----------------------------------------------------------------------------------------------------|----------------------------------------------|--------------------|
| H43030f_a01 | TrAa01ScCN | $\text{PR2O2HNO3} \rightarrow \text{PR2O2HNO3(aq)}$                                                | $k_{\text{exf}}(01, \text{ind\_PR2O2HNO3})$  | see general notes* |
| H43030b_a01 | TrAa01ScCN | $\text{PR2O2HNO3(aq)} \rightarrow \text{PR2O2HNO3}$                                                | $k_{\text{exb}}(01, \text{ind\_PR2O2HNO3})$  | see general notes* |
| H43031f_a01 | TrAa01ScCN | $\text{PROPOLNO3} \rightarrow \text{PROPOLNO3(aq)}$                                                | $k_{\text{exf}}(01, \text{ind\_PROPOLNO3})$  | see general notes* |
| H43031b_a01 | TrAa01ScCN | $\text{PROPOLNO3(aq)} \rightarrow \text{PROPOLNO3}$                                                | $k_{\text{exb}}(01, \text{ind\_PROPOLNO3})$  | see general notes* |
| H43032f_a01 | TrAa01ScC  | $\text{CH}_3\text{COCH}_2\text{OH} \rightarrow \text{CH}_3\text{COCH}_2\text{OH(aq)}$              | $k_{\text{exf}}(01, \text{ind\_ACETOL})$     | see general notes* |
| H43032b_a01 | TrAa01ScC  | $\text{CH}_3\text{COCH}_2\text{OH(aq)} \rightarrow \text{CH}_3\text{COCH}_2\text{OH}$              | $k_{\text{exb}}(01, \text{ind\_ACETOL})$     | see general notes* |
| H44000f_a01 | TrAa01ScC  | $\text{MACR} \rightarrow \text{MACR(aq)}$                                                          | $k_{\text{exf}}(01, \text{ind\_MACR})$       | see general notes* |
| H44000b_a01 | TrAa01ScC  | $\text{MACR(aq)} \rightarrow \text{MACR}$                                                          | $k_{\text{exb}}(01, \text{ind\_MACR})$       | see general notes* |
| H44001f_a01 | TrAa01ScC  | $\text{MVK} \rightarrow \text{MVK(aq)}$                                                            | $k_{\text{exf}}(01, \text{ind\_MVK})$        | see general notes* |
| H44001b_a01 | TrAa01ScC  | $\text{MVK(aq)} \rightarrow \text{MVK}$                                                            | $k_{\text{exb}}(01, \text{ind\_MVK})$        | see general notes* |
| H44002f_a01 | TrAa01ScC  | $\text{CH}_3\text{COCOCH}_2\text{O}_2 \rightarrow \text{CH}_3\text{COCOCH}_2\text{O}_2(\text{aq})$ | $k_{\text{exf}}(01, \text{ind\_BIACETO2})$   | see general notes* |
| H44002b_a01 | TrAa01ScC  | $\text{CH}_3\text{COCOCH}_2\text{O}_2(\text{aq}) \rightarrow \text{CH}_3\text{COCOCH}_2\text{O}_2$ | $k_{\text{exb}}(01, \text{ind\_BIACETO2})$   | see general notes* |
| H44003f_a01 | TrAa01ScC  | $\text{BIACETOH} \rightarrow \text{BIACETOH(aq)}$                                                  | $k_{\text{exf}}(01, \text{ind\_BIACETOH})$   | see general notes* |
| H44003b_a01 | TrAa01ScC  | $\text{BIACETOH(aq)} \rightarrow \text{BIACETOH}$                                                  | $k_{\text{exb}}(01, \text{ind\_BIACETOH})$   | see general notes* |
| H44004f_a01 | TrAa01ScC  | $\text{CH}_3\text{COCOCH}_2\text{OOH} \rightarrow \text{CH}_3\text{COCOCH}_2\text{OOH(aq)}$        | $k_{\text{exf}}(01, \text{ind\_BIACETO0H})$  | see general notes* |
| H44004b_a01 | TrAa01ScC  | $\text{CH}_3\text{COCOCH}_2\text{OOH(aq)} \rightarrow \text{CH}_3\text{COCOCH}_2\text{OOH}$        | $k_{\text{exb}}(01, \text{ind\_BIACETO0H})$  | see general notes* |
| H44005f_a01 | TrAa01ScC  | $\text{BUT2OLO} \rightarrow \text{BUT2OLO(aq)}$                                                    | $k_{\text{exf}}(01, \text{ind\_BUT2OLO})$    | see general notes* |
| H44005b_a01 | TrAa01ScC  | $\text{BUT2OLO(aq)} \rightarrow \text{BUT2OLO}$                                                    | $k_{\text{exb}}(01, \text{ind\_BUT2OLO})$    | see general notes* |
| H44006f_a01 | TrAa01ScC  | $\text{BUT2OLOOH} \rightarrow \text{BUT2OLOOH(aq)}$                                                | $k_{\text{exf}}(01, \text{ind\_BUT2OLOOH})$  | see general notes* |
| H44006b_a01 | TrAa01ScC  | $\text{BUT2OLOOH(aq)} \rightarrow \text{BUT2OLOOH}$                                                | $k_{\text{exb}}(01, \text{ind\_BUT2OLOOH})$  | see general notes* |
| H44007f_a01 | TrAa01ScC  | $\text{BZFUCO} \rightarrow \text{BZFUCO(aq)}$                                                      | $k_{\text{exf}}(01, \text{ind\_BZFUCO})$     | see general notes* |
| H44007b_a01 | TrAa01ScC  | $\text{BZFUCO(aq)} \rightarrow \text{BZFUCO}$                                                      | $k_{\text{exb}}(01, \text{ind\_BZFUCO})$     | see general notes* |
| H44008f_a01 | TrAa01ScC  | $\text{BZFUOOH} \rightarrow \text{BZFUOOH(aq)}$                                                    | $k_{\text{exf}}(01, \text{ind\_BZFUOOH})$    | see general notes* |
| H44008b_a01 | TrAa01ScC  | $\text{BZFUOOH(aq)} \rightarrow \text{BZFUOOH}$                                                    | $k_{\text{exb}}(01, \text{ind\_BZFUOOH})$    | see general notes* |
| H44009f_a01 | TrAa01ScC  | $\text{C312COCO3H} \rightarrow \text{C312COCO3H(aq)}$                                              | $k_{\text{exf}}(01, \text{ind\_C312COCO3H})$ | see general notes* |
| H44009b_a01 | TrAa01ScC  | $\text{C312COCO3H(aq)} \rightarrow \text{C312COCO3H}$                                              | $k_{\text{exb}}(01, \text{ind\_C312COCO3H})$ | see general notes* |
| H44010f_a01 | TrAa01ScCN | $\text{C312COPAN} \rightarrow \text{C312COPAN(aq)}$                                                | $k_{\text{exf}}(01, \text{ind\_C312COPAN})$  | see general notes* |
| H44010b_a01 | TrAa01ScCN | $\text{C312COPAN(aq)} \rightarrow \text{C312COPAN}$                                                | $k_{\text{exb}}(01, \text{ind\_C312COPAN})$  | see general notes* |
| H44011f_a01 | TrAa01ScC  | $\text{C413COOOH} \rightarrow \text{C413COOOH(aq)}$                                                | $k_{\text{exf}}(01, \text{ind\_C413COOOH})$  | see general notes* |
| H44011b_a01 | TrAa01ScC  | $\text{C413COOOH(aq)} \rightarrow \text{C413COOOH}$                                                | $k_{\text{exb}}(01, \text{ind\_C413COOOH})$  | see general notes* |
| H44012f_a01 | TrAa01ScC  | $\text{C44OOH} \rightarrow \text{C44OOH(aq)}$                                                      | $k_{\text{exf}}(01, \text{ind\_C44OOH})$     | see general notes* |
| H44012b_a01 | TrAa01ScC  | $\text{C44OOH(aq)} \rightarrow \text{C44OOH}$                                                      | $k_{\text{exb}}(01, \text{ind\_C44OOH})$     | see general notes* |
| H44013f_a01 | TrAa01ScC  | $\text{C4CODIAL} \rightarrow \text{C4CODIAL(aq)}$                                                  | $k_{\text{exf}}(01, \text{ind\_C4CODIAL})$   | see general notes* |

Table 3: Reversible (Henry’s law) equilibria and irreversible (“heterogenous”) uptake

| #           | labels     | reaction                                                                                      | rate coefficient                        | reference          |
|-------------|------------|-----------------------------------------------------------------------------------------------|-----------------------------------------|--------------------|
| H44013b_a01 | TrAa01ScC  | C4CODIAL(aq) $\rightarrow$ C4CODIAL                                                           | k_exb(01, ind_C4CODIAL)                 | see general notes* |
| H44014f_a01 | TrAa01ScCN | C4PAN5 $\rightarrow$ C4PAN5(aq)                                                               | k_exf(01, ind_C4PAN5)                   | see general notes* |
| H44014b_a01 | TrAa01ScCN | C4PAN5(aq) $\rightarrow$ C4PAN5                                                               | k_exb(01, ind_C4PAN5)                   | see general notes* |
| H44015f_a01 | TrAa01ScC  | CH <sub>3</sub> COCHCO $\rightarrow$ CH <sub>3</sub> COCHCO(aq)                               | k_exf(01, ind_CH3COCHCO)                | see general notes* |
| H44015b_a01 | TrAa01ScC  | CH <sub>3</sub> COCHCO(aq) $\rightarrow$ CH <sub>3</sub> COCHCO                               | k_exb(01, ind_CH3COCHCO)                | see general notes* |
| H44016f_a01 | TrAa01ScC  | CH <sub>3</sub> COCOCO <sub>2</sub> H $\rightarrow$ CH <sub>3</sub> COCOCO <sub>2</sub> H(aq) | k_exf(01, ind_CH3COCOCO <sub>2</sub> H) | see general notes* |
| H44016b_a01 | TrAa01ScC  | CH <sub>3</sub> COCOCO <sub>2</sub> H(aq) $\rightarrow$ CH <sub>3</sub> COCOCO <sub>2</sub> H | k_exb(01, ind_CH3COCOCO <sub>2</sub> H) | see general notes* |
| H44017f_a01 | TrAa01ScC  | CH <sub>3</sub> COOHCHCHO $\rightarrow$ CH <sub>3</sub> COOHCHCHO(aq)                         | k_exf(01, ind_CH3COOHCHCHO)             | see general notes* |
| H44017b_a01 | TrAa01ScC  | CH <sub>3</sub> COOHCHCHO(aq) $\rightarrow$ CH <sub>3</sub> COOHCHCHO                         | k_exb(01, ind_CH3COOHCHCHO)             | see general notes* |
| H44018f_a01 | TrAa01ScC  | CHOC3COO <sub>2</sub> $\rightarrow$ CHOC3COO <sub>2</sub> (aq)                                | k_exf(01, ind_CHOC3COO <sub>2</sub> )   | see general notes* |
| H44018b_a01 | TrAa01ScC  | CHOC3COO <sub>2</sub> (aq) $\rightarrow$ CHOC3COO <sub>2</sub>                                | k_exb(01, ind_CHOC3COO <sub>2</sub> )   | see general notes* |
| H44019f_a01 | TrAa01ScC  | CO14O3CHO $\rightarrow$ CO14O3CHO(aq)                                                         | k_exf(01, ind_CO14O3CHO)                | see general notes* |
| H44019b_a01 | TrAa01ScC  | CO14O3CHO(aq) $\rightarrow$ CO14O3CHO                                                         | k_exb(01, ind_CO14O3CHO)                | see general notes* |
| H44020f_a01 | TrAa01ScC  | CO14O3CO <sub>2</sub> H $\rightarrow$ CO14O3CO <sub>2</sub> H(aq)                             | k_exf(01, ind_CO14O3CO <sub>2</sub> H)  | see general notes* |
| H44020b_a01 | TrAa01ScC  | CO14O3CO <sub>2</sub> H(aq) $\rightarrow$ CO14O3CO <sub>2</sub> H                             | k_exb(01, ind_CO14O3CO <sub>2</sub> H)  | see general notes* |
| H44021f_a01 | TrAa01ScC  | CH <sub>3</sub> COCOCHO $\rightarrow$ CH <sub>3</sub> COCOCHO(aq)                             | k_exf(01, ind_CO23C3CHO)                | see general notes* |
| H44021b_a01 | TrAa01ScC  | CH <sub>3</sub> COCOCHO(aq) $\rightarrow$ CH <sub>3</sub> COCOCHO                             | k_exb(01, ind_CO23C3CHO)                | see general notes* |
| H44022f_a01 | TrAa01ScC  | CO <sub>2</sub> C3CHO $\rightarrow$ CO <sub>2</sub> C3CHO(aq)                                 | k_exf(01, ind_CO2C3CHO)                 | see general notes* |
| H44022b_a01 | TrAa01ScC  | CO <sub>2</sub> C3CHO(aq) $\rightarrow$ CO <sub>2</sub> C3CHO                                 | k_exb(01, ind_CO2C3CHO)                 | see general notes* |
| H44023f_a01 | TrAa01ScC  | CO <sub>2</sub> C4DIAL $\rightarrow$ CO <sub>2</sub> C4DIAL(aq)                               | k_exf(01, ind_CO2C4DIAL)                | see general notes* |
| H44023b_a01 | TrAa01ScC  | CO <sub>2</sub> C4DIAL(aq) $\rightarrow$ CO <sub>2</sub> C4DIAL                               | k_exb(01, ind_CO2C4DIAL)                | see general notes* |
| H44024f_a01 | TrAa01ScC  | CO <sub>2</sub> H3CHO $\rightarrow$ CO <sub>2</sub> H3CHO(aq)                                 | k_exf(01, ind_CO2H3CHO)                 | see general notes* |
| H44024b_a01 | TrAa01ScC  | CO <sub>2</sub> H3CHO(aq) $\rightarrow$ CO <sub>2</sub> H3CHO                                 | k_exb(01, ind_CO2H3CHO)                 | see general notes* |
| H44025f_a01 | TrAa01ScC  | CO <sub>2</sub> H3CO <sub>2</sub> H $\rightarrow$ CO <sub>2</sub> H3CO <sub>2</sub> H(aq)     | k_exf(01, ind_CO2H3CO <sub>2</sub> H)   | see general notes* |
| H44025b_a01 | TrAa01ScC  | CO <sub>2</sub> H3CO <sub>2</sub> H(aq) $\rightarrow$ CO <sub>2</sub> H3CO <sub>2</sub> H     | k_exb(01, ind_CO2H3CO <sub>2</sub> H)   | see general notes* |
| H44026f_a01 | TrAa01ScC  | CO <sub>2</sub> H3CO <sub>3</sub> H $\rightarrow$ CO <sub>2</sub> H3CO <sub>3</sub> H(aq)     | k_exf(01, ind_CO2H3CO <sub>3</sub> H)   | see general notes* |
| H44026b_a01 | TrAa01ScC  | CO <sub>2</sub> H3CO <sub>3</sub> H(aq) $\rightarrow$ CO <sub>2</sub> H3CO <sub>3</sub> H     | k_exb(01, ind_CO2H3CO <sub>3</sub> H)   | see general notes* |
| H44027f_a01 | TrAa01ScC  | EPXC4DIAL $\rightarrow$ EPXC4DIAL(aq)                                                         | k_exf(01, ind_EPXC4DIAL)                | see general notes* |
| H44027b_a01 | TrAa01ScC  | EPXC4DIAL(aq) $\rightarrow$ EPXC4DIAL                                                         | k_exb(01, ind_EPXC4DIAL)                | see general notes* |
| H44028f_a01 | TrAa01ScC  | EPXDLCO <sub>2</sub> H $\rightarrow$ EPXDLCO <sub>2</sub> H(aq)                               | k_exf(01, ind_EPXDLCO <sub>2</sub> H)   | see general notes* |
| H44028b_a01 | TrAa01ScC  | EPXDLCO <sub>2</sub> H(aq) $\rightarrow$ EPXDLCO <sub>2</sub> H                               | k_exb(01, ind_EPXDLCO <sub>2</sub> H)   | see general notes* |
| H44029f_a01 | TrAa01ScC  | EPXDLCO <sub>3</sub> H $\rightarrow$ EPXDLCO <sub>3</sub> H(aq)                               | k_exf(01, ind_EPXDLCO <sub>3</sub> H)   | see general notes* |
| H44029b_a01 | TrAa01ScC  | EPXDLCO <sub>3</sub> H(aq) $\rightarrow$ EPXDLCO <sub>3</sub> H                               | k_exb(01, ind_EPXDLCO <sub>3</sub> H)   | see general notes* |

Table 3: Reversible (Henry's law) equilibria and irreversible ("heterogenous") uptake

| #           | labels    | reaction                                                                  | rate coefficient                                                  | reference          |
|-------------|-----------|---------------------------------------------------------------------------|-------------------------------------------------------------------|--------------------|
| H44030f_a01 | TrAa01ScC | $\text{HCOCCH}_3\text{CHOOH} \rightarrow \text{HCOCCH}_3\text{CHOOH(aq)}$ | $\rightarrow \text{k\_exf}(01, \text{ind\_HCOCCH}_3\text{CHOOH})$ | see general notes* |
| H44030b_a01 | TrAa01ScC | $\text{HCOCCH}_3\text{CHOOH(aq)} \rightarrow \text{HCOCCH}_3\text{CHOOH}$ | $\rightarrow \text{k\_exb}(01, \text{ind\_HCOCCH}_3\text{CHOOH})$ | see general notes* |
| H44031f_a01 | TrAa01ScC | $\text{HCOCCH}_3\text{CO} \rightarrow \text{HCOCCH}_3\text{CO(aq)}$       | $\text{k\_exf}(01, \text{ind\_HCOCCH}_3\text{CO})$                | see general notes* |
| H44031b_a01 | TrAa01ScC | $\text{HCOCCH}_3\text{CO(aq)} \rightarrow \text{HCOCCH}_3\text{CO}$       | $\text{k\_exb}(01, \text{ind\_HCOCCH}_3\text{CO})$                | see general notes* |
| H44032f_a01 | TrAa01ScC | $\text{HMAC} \rightarrow \text{HMAC(aq)}$                                 | $\text{k\_exf}(01, \text{ind\_HMAC})$                             | see general notes* |
| H44032b_a01 | TrAa01ScC | $\text{HMAC(aq)} \rightarrow \text{HMAC}$                                 | $\text{k\_exb}(01, \text{ind\_HMAC})$                             | see general notes* |
| H44033f_a01 | TrAa01ScC | $\text{HO12CO3C4} \rightarrow \text{HO12CO3C4(aq)}$                       | $\text{k\_exf}(01, \text{ind\_HO12CO3C4})$                        | see general notes* |
| H44033b_a01 | TrAa01ScC | $\text{HO12CO3C4(aq)} \rightarrow \text{HO12CO3C4}$                       | $\text{k\_exb}(01, \text{ind\_HO12CO3C4})$                        | see general notes* |
| H44034f_a01 | TrAa01ScC | $\text{HOCOC4DIAL} \rightarrow \text{HOCOC4DIAL(aq)}$                     | $\text{k\_exf}(01, \text{ind\_HOCOC4DIAL})$                       | see general notes* |
| H44034b_a01 | TrAa01ScC | $\text{HOCOC4DIAL(aq)} \rightarrow \text{HOCOC4DIAL}$                     | $\text{k\_exb}(01, \text{ind\_HOCOC4DIAL})$                       | see general notes* |
| H44035f_a01 | TrAa01ScC | $\text{HVMK} \rightarrow \text{HVMK(aq)}$                                 | $\text{k\_exf}(01, \text{ind\_HVMK})$                             | see general notes* |
| H44035b_a01 | TrAa01ScC | $\text{HVMK(aq)} \rightarrow \text{HVMK}$                                 | $\text{k\_exb}(01, \text{ind\_HVMK})$                             | see general notes* |
| H44036f_a01 | TrAa01ScC | $\text{IBUTALOH} \rightarrow \text{IBUTALOH(aq)}$                         | $\text{k\_exf}(01, \text{ind\_IBUTALOH})$                         | see general notes* |
| H44036b_a01 | TrAa01ScC | $\text{IBUTALOH(aq)} \rightarrow \text{IBUTALOH}$                         | $\text{k\_exb}(01, \text{ind\_IBUTALOH})$                         | see general notes* |
| H44037f_a01 | TrAa01ScC | $\text{IBUTDIAL} \rightarrow \text{IBUTDIAL(aq)}$                         | $\text{k\_exf}(01, \text{ind\_IBUTDIAL})$                         | see general notes* |
| H44037b_a01 | TrAa01ScC | $\text{IBUTDIAL(aq)} \rightarrow \text{IBUTDIAL}$                         | $\text{k\_exb}(01, \text{ind\_IBUTDIAL})$                         | see general notes* |
| H44038f_a01 | TrAa01ScC | $\text{IBUTOLBOOH} \rightarrow \text{IBUTOLBOOH(aq)}$                     | $\text{k\_exf}(01, \text{ind\_IBUTOLBOOH})$                       | see general notes* |
| H44038b_a01 | TrAa01ScC | $\text{IBUTOLBOOH(aq)} \rightarrow \text{IBUTOLBOOH}$                     | $\text{k\_exb}(01, \text{ind\_IBUTOLBOOH})$                       | see general notes* |
| H44039f_a01 | TrAa01ScC | $\text{IPRHOCO2H} \rightarrow \text{IPRHOCO2H(aq)}$                       | $\text{k\_exf}(01, \text{ind\_IPRHOCO2H})$                        | see general notes* |
| H44039b_a01 | TrAa01ScC | $\text{IPRHOCO2H(aq)} \rightarrow \text{IPRHOCO2H}$                       | $\text{k\_exb}(01, \text{ind\_IPRHOCO2H})$                        | see general notes* |
| H44040f_a01 | TrAa01ScC | $\text{IPRHOCO3H} \rightarrow \text{IPRHOCO3H(aq)}$                       | $\text{k\_exf}(01, \text{ind\_IPRHOCO3H})$                        | see general notes* |
| H44040b_a01 | TrAa01ScC | $\text{IPRHOCO3H(aq)} \rightarrow \text{IPRHOCO3H}$                       | $\text{k\_exb}(01, \text{ind\_IPRHOCO3H})$                        | see general notes* |
| H44041f_a01 | TrAa01ScC | $\text{LBUT1ENOOH} \rightarrow \text{LBUT1ENOOH(aq)}$                     | $\text{k\_exf}(01, \text{ind\_LBUT1ENOOH})$                       | see general notes* |
| H44041b_a01 | TrAa01ScC | $\text{LBUT1ENOOH(aq)} \rightarrow \text{LBUT1ENOOH}$                     | $\text{k\_exb}(01, \text{ind\_LBUT1ENOOH})$                       | see general notes* |
| H44042f_a01 | TrAa01ScC | $\text{LHMKVABOOH} \rightarrow \text{LHMKVABOOH(aq)}$                     | $\text{k\_exf}(01, \text{ind\_LHMKVABOOH})$                       | see general notes* |
| H44042b_a01 | TrAa01ScC | $\text{LHMKVABOOH(aq)} \rightarrow \text{LHMKVABOOH}$                     | $\text{k\_exb}(01, \text{ind\_LHMKVABOOH})$                       | see general notes* |
| H44043f_a01 | TrAa01ScC | $\text{LMEKOOH} \rightarrow \text{LMEKOOH(aq)}$                           | $\text{k\_exf}(01, \text{ind\_LMEKOOH})$                          | see general notes* |
| H44043b_a01 | TrAa01ScC | $\text{LMEKOOH(aq)} \rightarrow \text{LMEKOOH}$                           | $\text{k\_exb}(01, \text{ind\_LMEKOOH})$                          | see general notes* |
| H44044f_a01 | TrAa01ScC | $\text{MACO2H} \rightarrow \text{MACO2H(aq)}$                             | $\text{k\_exf}(01, \text{ind\_MACO2H})$                           | see general notes* |
| H44044b_a01 | TrAa01ScC | $\text{MACO2H(aq)} \rightarrow \text{MACO2H}$                             | $\text{k\_exb}(01, \text{ind\_MACO2H})$                           | see general notes* |
| H44045f_a01 | TrAa01ScC | $\text{MACO3H} \rightarrow \text{MACO3H(aq)}$                             | $\text{k\_exf}(01, \text{ind\_MACO3H})$                           | see general notes* |
| H44045b_a01 | TrAa01ScC | $\text{MACO3H(aq)} \rightarrow \text{MACO3H}$                             | $\text{k\_exb}(01, \text{ind\_MACO3H})$                           | see general notes* |
| H44046f_a01 | TrAa01ScC | $\text{MACROH} \rightarrow \text{MACROH(aq)}$                             | $\text{k\_exf}(01, \text{ind\_MACROH})$                           | see general notes* |

Table 3: Reversible (Henry's law) equilibria and irreversible ("heterogenous") uptake

| #           | labels     | reaction                                      | rate coefficient            | reference          |
|-------------|------------|-----------------------------------------------|-----------------------------|--------------------|
| H44046b_a01 | TrAa01ScC  | MACROH(aq) $\rightarrow$ MACROH               | k_exb(01,ind_MACROH)        | see general notes* |
| H44047f_a01 | TrAa01ScC  | MACROOH $\rightarrow$ MACROOH(aq)             | k_exf(01,ind_MACROOH)       | see general notes* |
| H44047b_a01 | TrAa01ScC  | MACROOH(aq) $\rightarrow$ MACROOH             | k_exb(01,ind_MACROOH)       | see general notes* |
| H44048f_a01 | TrAa01ScC  | MALANHYOOH $\rightarrow$ MALANHYOOH(aq)       | k_exf(01,ind_MALANHYOOH)    | see general notes* |
| H44048b_a01 | TrAa01ScC  | MALANHYOOH(aq) $\rightarrow$ MALANHYOOH       | k_exb(01,ind_MALANHYOOH)    | see general notes* |
| H44049f_a01 | TrAa01ScC  | MALDALCO2H $\rightarrow$ MALDALCO2H(aq)       | k_exf(01,ind_MALDALCO2H)    | see general notes* |
| H44049b_a01 | TrAa01ScC  | MALDALCO2H(aq) $\rightarrow$ MALDALCO2H       | k_exb(01,ind_MALDALCO2H)    | see general notes* |
| H44050f_a01 | TrAa01ScC  | MALDALCO3H $\rightarrow$ MALDALCO3H(aq)       | k_exf(01,ind_MALDALCO3H)    | see general notes* |
| H44050b_a01 | TrAa01ScC  | MALDALCO3H(aq) $\rightarrow$ MALDALCO3H       | k_exb(01,ind_MALDALCO3H)    | see general notes* |
| H44051f_a01 | TrAa01ScC  | MALDIAL $\rightarrow$ MALDIAL(aq)             | k_exf(01,ind_MALDIAL)       | see general notes* |
| H44051b_a01 | TrAa01ScC  | MALDIAL(aq) $\rightarrow$ MALDIAL             | k_exb(01,ind_MALDIAL)       | see general notes* |
| H44052f_a01 | TrAa01ScC  | MALDIALOOH $\rightarrow$ MALDIALOOH(aq)       | k_exf(01,ind_MALDIALOOH)    | see general notes* |
| H44052b_a01 | TrAa01ScC  | MALDIALOOH(aq) $\rightarrow$ MALDIALOOH       | k_exb(01,ind_MALDIALOOH)    | see general notes* |
| H44053f_a01 | TrAa01ScC  | MALNHYOHCO $\rightarrow$ MALNHYOHCO(aq)       | k_exf(01,ind_MALNHYOHCO)    | see general notes* |
| H44053b_a01 | TrAa01ScC  | MALNHYOHCO(aq) $\rightarrow$ MALNHYOHCO       | k_exb(01,ind_MALNHYOHCO)    | see general notes* |
| H44054f_a01 | TrAa01ScC  | MECOACEOOH $\rightarrow$ MECOACEOOH(aq)       | k_exf(01,ind_MECOACEOOH)    | see general notes* |
| H44054b_a01 | TrAa01ScC  | MECOACEOOH(aq) $\rightarrow$ MECOACEOOH       | k_exb(01,ind_MECOACEOOH)    | see general notes* |
| H44055f_a01 | TrAa01ScCN | MVKNO3 $\rightarrow$ MVKNO3(aq)               | k_exf(01,ind_MVKNO3)        | see general notes* |
| H44055b_a01 | TrAa01ScCN | MVKNO3(aq) $\rightarrow$ MVKNO3               | k_exb(01,ind_MVKNO3)        | see general notes* |
| H44056f_a01 | TrAa01ScCN | NBZFUOOH $\rightarrow$ NBZFUOOH(aq)           | k_exf(01,ind_NBZFUOOH)      | see general notes* |
| H44056b_a01 | TrAa01ScCN | NBZFUOOH(aq) $\rightarrow$ NBZFUOOH           | k_exb(01,ind_NBZFUOOH)      | see general notes* |
| H44057f_a01 | TrAa01ScCN | NC4DCO2H $\rightarrow$ NC4DCO2H(aq)           | k_exf(01,ind_NC4DCO2H)      | see general notes* |
| H44057b_a01 | TrAa01ScCN | NC4DCO2H(aq) $\rightarrow$ NC4DCO2H           | k_exb(01,ind_NC4DCO2H)      | see general notes* |
| H45000f_a01 | TrAa01ScC  | ACCOMMECHO $\rightarrow$ ACCOMMECHO(aq)       | k_exf(01,ind_ACCOMMECHO)    | see general notes* |
| H45000b_a01 | TrAa01ScC  | ACCOMMECHO(aq) $\rightarrow$ ACCOMMECHO       | k_exb(01,ind_ACCOMMECHO)    | see general notes* |
| H45001f_a01 | TrAa01ScC  | ACCOMMECO3H $\rightarrow$ ACCOMMECO3H(aq)     | k_exf(01,ind_ACCOMMECO3H)   | see general notes* |
| H45001b_a01 | TrAa01ScC  | ACCOMMECO3H(aq) $\rightarrow$ ACCOMMECO3H     | k_exb(01,ind_ACCOMMECO3H)   | see general notes* |
| H45002f_a01 | TrAa01ScC  | C1ODC2O2C4OOH $\rightarrow$ C1ODC2O2C4OOH(aq) | k_exf(01,ind_C1ODC2O2C4OOH) | see general notes* |
| H45002b_a01 | TrAa01ScC  | C1ODC2O2C4OOH(aq) $\rightarrow$ C1ODC2O2C4OOH | k_exb(01,ind_C1ODC2O2C4OOH) | see general notes* |
| H45003f_a01 | TrAa01ScC  | C1ODC2OOHC4OD $\rightarrow$ C1ODC2OOHC4OD(aq) | k_exf(01,ind_C1ODC2OOHC4OD) | see general notes* |
| H45003b_a01 | TrAa01ScC  | C1ODC2OOHC4OD(aq) $\rightarrow$ C1ODC2OOHC4OD | k_exb(01,ind_C1ODC2OOHC4OD) | see general notes* |

Table 3: Reversible (Henry's law) equilibria and irreversible ("heterogenous") uptake

| #           | labels     | reaction                             | rate coefficient                | reference          |
|-------------|------------|--------------------------------------|---------------------------------|--------------------|
| H45004f_a01 | TrAa01ScC  | C10DC3O2C4OOH<br>C10DC3O2C4OOH(aq)   | → k_exf(01, ind_C10DC3O2C4OOH)  | see general notes* |
| H45004b_a01 | TrAa01ScC  | C10DC3O2C4OOH(aq)<br>C10DC3O2C4OOH   | → k_exb(01, ind_C10DC3O2C4OOH)  | see general notes* |
| H45005f_a01 | TrAa01ScC  | C10OHC2OOHC4OD<br>C10OHC2OOHC4OD(aq) | → k_exf(01, ind_C10OHC2OOHC4OD) | see general notes* |
| H45005b_a01 | TrAa01ScC  | C10OHC2OOHC4OD(aq)<br>C10OHC2OOHC4OD | → k_exb(01, ind_C10OHC2OOHC4OD) | see general notes* |
| H45006f_a01 | TrAa01ScC  | C24O3CCO2H → C24O3CCO2H(aq)          | k_exf(01, ind_C24O3CCO2H)       | see general notes* |
| H45006b_a01 | TrAa01ScC  | C24O3CCO2H(aq) → C24O3CCO2H          | k_exb(01, ind_C24O3CCO2H)       | see general notes* |
| H45007f_a01 | TrAa01ScC  | C4CO2DBCO3 → C4CO2DBCO3(aq)          | k_exf(01, ind_C4CO2DBCO3)       | see general notes* |
| H45007b_a01 | TrAa01ScC  | C4CO2DBCO3(aq) → C4CO2DBCO3          | k_exb(01, ind_C4CO2DBCO3)       | see general notes* |
| H45008f_a01 | TrAa01ScCN | C4CO2DBPAN → C4CO2DBPAN(aq)          | k_exf(01, ind_C4CO2DBPAN)       | see general notes* |
| H45008b_a01 | TrAa01ScCN | C4CO2DBPAN(aq) → C4CO2DBPAN          | k_exb(01, ind_C4CO2DBPAN)       | see general notes* |
| H45009f_a01 | TrAa01ScC  | C4CO2DCO3H → C4CO2DCO3H(aq)          | k_exf(01, ind_C4CO2DCO3H)       | see general notes* |
| H45009b_a01 | TrAa01ScC  | C4CO2DCO3H(aq) → C4CO2DCO3H          | k_exb(01, ind_C4CO2DCO3H)       | see general notes* |
| H45010f_a01 | TrAa01ScCN | C4MCONO3OH → C4MCONO3OH(aq)          | k_exf(01, ind_C4MCONO3OH)       | see general notes* |
| H45010b_a01 | TrAa01ScCN | C4MCONO3OH(aq) → C4MCONO3OH          | k_exb(01, ind_C4MCONO3OH)       | see general notes* |
| H45011f_a01 | TrAa01ScC  | C511OOH → C511OOH(aq)                | k_exf(01, ind_C511OOH)          | see general notes* |
| H45011b_a01 | TrAa01ScC  | C511OOH(aq) → C511OOH                | k_exb(01, ind_C511OOH)          | see general notes* |
| H45012f_a01 | TrAa01ScC  | C512OOH → C512OOH(aq)                | k_exf(01, ind_C512OOH)          | see general notes* |
| H45012b_a01 | TrAa01ScC  | C512OOH(aq) → C512OOH                | k_exb(01, ind_C512OOH)          | see general notes* |
| H45013f_a01 | TrAa01ScC  | C5134CO2OH → C5134CO2OH(aq)          | k_exf(01, ind_C5134CO2OH)       | see general notes* |
| H45013b_a01 | TrAa01ScC  | C5134CO2OH(aq) → C5134CO2OH          | k_exb(01, ind_C5134CO2OH)       | see general notes* |
| H45014f_a01 | TrAa01ScC  | C513CO → C513CO(aq)                  | k_exf(01, ind_C513CO)           | see general notes* |
| H45014b_a01 | TrAa01ScC  | C513CO(aq) → C513CO                  | k_exb(01, ind_C513CO)           | see general notes* |
| H45015f_a01 | TrAa01ScC  | C513OOH → C513OOH(aq)                | k_exf(01, ind_C513OOH)          | see general notes* |
| H45015b_a01 | TrAa01ScC  | C513OOH(aq) → C513OOH                | k_exb(01, ind_C513OOH)          | see general notes* |
| H45016f_a01 | TrAa01ScCN | C514NO3 → C514NO3(aq)                | k_exf(01, ind_C514NO3)          | see general notes* |
| H45016b_a01 | TrAa01ScCN | C514NO3(aq) → C514NO3                | k_exb(01, ind_C514NO3)          | see general notes* |
| H45017f_a01 | TrAa01ScC  | C514OOH → C514OOH(aq)                | k_exf(01, ind_C514OOH)          | see general notes* |
| H45017b_a01 | TrAa01ScC  | C514OOH(aq) → C514OOH                | k_exb(01, ind_C514OOH)          | see general notes* |
| H45018f_a01 | TrAa01ScC  | C54CO → C54CO(aq)                    | k_exf(01, ind_C54CO)            | see general notes* |
| H45018b_a01 | TrAa01ScC  | C54CO(aq) → C54CO                    | k_exb(01, ind_C54CO)            | see general notes* |
| H45019f_a01 | TrAa01ScC  | C59OOH → C59OOH(aq)                  | k_exf(01, ind_C59OOH)           | see general notes* |

Table 3: Reversible (Henry’s law) equilibria and irreversible (“heterogenous”) uptake

| #           | labels     | reaction                                              | rate coefficient                             | reference          |
|-------------|------------|-------------------------------------------------------|----------------------------------------------|--------------------|
| H45019b_a01 | TrAa01ScC  | $\text{C59OOH(aq)} \rightarrow \text{C59OOH}$         | $k_{\text{exb}}(01, \text{ind\_C59OOH})$     | see general notes* |
| H45020f_a01 | TrAa01ScC  | $\text{C5CO14OH} \rightarrow \text{C5CO14OH(aq)}$     | $k_{\text{exf}}(01, \text{ind\_C5CO14OH})$   | see general notes* |
| H45020b_a01 | TrAa01ScC  | $\text{C5CO14OH(aq)} \rightarrow \text{C5CO14OH}$     | $k_{\text{exb}}(01, \text{ind\_C5CO14OH})$   | see general notes* |
| H45021f_a01 | TrAa01ScC  | $\text{C5CO14OOH} \rightarrow \text{C5CO14OOH(aq)}$   | $k_{\text{exf}}(01, \text{ind\_C5CO14OOH})$  | see general notes* |
| H45021b_a01 | TrAa01ScC  | $\text{C5CO14OOH(aq)} \rightarrow \text{C5CO14OOH}$   | $k_{\text{exb}}(01, \text{ind\_C5CO14OOH})$  | see general notes* |
| H45022f_a01 | TrAa01ScC  | $\text{C5DIALCO} \rightarrow \text{C5DIALCO(aq)}$     | $k_{\text{exf}}(01, \text{ind\_C5DIALCO})$   | see general notes* |
| H45022b_a01 | TrAa01ScC  | $\text{C5DIALCO(aq)} \rightarrow \text{C5DIALCO}$     | $k_{\text{exb}}(01, \text{ind\_C5DIALCO})$   | see general notes* |
| H45023f_a01 | TrAa01ScC  | $\text{C5DIALOOH} \rightarrow \text{C5DIALOOH(aq)}$   | $k_{\text{exf}}(01, \text{ind\_C5DIALOOH})$  | see general notes* |
| H45023b_a01 | TrAa01ScC  | $\text{C5DIALOOH(aq)} \rightarrow \text{C5DIALOOH}$   | $k_{\text{exb}}(01, \text{ind\_C5DIALOOH})$  | see general notes* |
| H45024f_a01 | TrAa01ScC  | $\text{C5DICARB} \rightarrow \text{C5DICARB(aq)}$     | $k_{\text{exf}}(01, \text{ind\_C5DICARB})$   | see general notes* |
| H45024b_a01 | TrAa01ScC  | $\text{C5DICARB(aq)} \rightarrow \text{C5DICARB}$     | $k_{\text{exb}}(01, \text{ind\_C5DICARB})$   | see general notes* |
| H45025f_a01 | TrAa01ScC  | $\text{C5DICAROOH} \rightarrow \text{C5DICAROOH(aq)}$ | $k_{\text{exf}}(01, \text{ind\_C5DICAROOH})$ | see general notes* |
| H45025b_a01 | TrAa01ScC  | $\text{C5DICAROOH(aq)} \rightarrow \text{C5DICAROOH}$ | $k_{\text{exb}}(01, \text{ind\_C5DICAROOH})$ | see general notes* |
| H45026f_a01 | TrAa01ScCN | $\text{C5PAN9} \rightarrow \text{C5PAN9(aq)}$         | $k_{\text{exf}}(01, \text{ind\_C5PAN9})$     | see general notes* |
| H45026b_a01 | TrAa01ScCN | $\text{C5PAN9(aq)} \rightarrow \text{C5PAN9}$         | $k_{\text{exb}}(01, \text{ind\_C5PAN9})$     | see general notes* |
| H45027f_a01 | TrAa01ScC  | $\text{CHOC3COOOH} \rightarrow \text{CHOC3COOOH(aq)}$ | $k_{\text{exf}}(01, \text{ind\_CHOC3COOOH})$ | see general notes* |
| H45027b_a01 | TrAa01ScC  | $\text{CHOC3COOOH(aq)} \rightarrow \text{CHOC3COOOH}$ | $k_{\text{exb}}(01, \text{ind\_CHOC3COOOH})$ | see general notes* |
| H45028f_a01 | TrAa01ScCN | $\text{CHOC3COPAN} \rightarrow \text{CHOC3COPAN(aq)}$ | $k_{\text{exf}}(01, \text{ind\_CHOC3COPAN})$ | see general notes* |
| H45028b_a01 | TrAa01ScCN | $\text{CHOC3COPAN(aq)} \rightarrow \text{CHOC3COPAN}$ | $k_{\text{exb}}(01, \text{ind\_CHOC3COPAN})$ | see general notes* |
| H45029f_a01 | TrAa01ScC  | $\text{CO13C4CHO} \rightarrow \text{CO13C4CHO(aq)}$   | $k_{\text{exf}}(01, \text{ind\_CO13C4CHO})$  | see general notes* |
| H45029b_a01 | TrAa01ScC  | $\text{CO13C4CHO(aq)} \rightarrow \text{CO13C4CHO}$   | $k_{\text{exb}}(01, \text{ind\_CO13C4CHO})$  | see general notes* |
| H45030f_a01 | TrAa01ScC  | $\text{CO23C4CHO} \rightarrow \text{CO23C4CHO(aq)}$   | $k_{\text{exf}}(01, \text{ind\_CO23C4CHO})$  | see general notes* |
| H45030b_a01 | TrAa01ScC  | $\text{CO23C4CHO(aq)} \rightarrow \text{CO23C4CHO}$   | $k_{\text{exb}}(01, \text{ind\_CO23C4CHO})$  | see general notes* |
| H45031f_a01 | TrAa01ScC  | $\text{CO23C4CO3H} \rightarrow \text{CO23C4CO3H(aq)}$ | $k_{\text{exf}}(01, \text{ind\_CO23C4CO3H})$ | see general notes* |
| H45031b_a01 | TrAa01ScC  | $\text{CO23C4CO3H(aq)} \rightarrow \text{CO23C4CO3H}$ | $k_{\text{exb}}(01, \text{ind\_CO23C4CO3H})$ | see general notes* |
| H45032f_a01 | TrAa01ScCN | $\text{DB1NO3} \rightarrow \text{DB1NO3(aq)}$         | $k_{\text{exf}}(01, \text{ind\_DB1NO3})$     | see general notes* |
| H45032b_a01 | TrAa01ScCN | $\text{DB1NO3(aq)} \rightarrow \text{DB1NO3}$         | $k_{\text{exb}}(01, \text{ind\_DB1NO3})$     | see general notes* |
| H45033f_a01 | TrAa01ScC  | $\text{DB1OOH} \rightarrow \text{DB1OOH(aq)}$         | $k_{\text{exf}}(01, \text{ind\_DB1OOH})$     | see general notes* |
| H45033b_a01 | TrAa01ScC  | $\text{DB1OOH(aq)} \rightarrow \text{DB1OOH}$         | $k_{\text{exb}}(01, \text{ind\_DB1OOH})$     | see general notes* |
| H45034f_a01 | TrAa01ScC  | $\text{DB2OOH} \rightarrow \text{DB2OOH(aq)}$         | $k_{\text{exf}}(01, \text{ind\_DB2OOH})$     | see general notes* |
| H45034b_a01 | TrAa01ScC  | $\text{DB2OOH(aq)} \rightarrow \text{DB2OOH}$         | $k_{\text{exb}}(01, \text{ind\_DB2OOH})$     | see general notes* |
| H45035f_a01 | TrAa01ScC  | $\text{ISOPA0H} \rightarrow \text{ISOPA0H(aq)}$       | $k_{\text{exf}}(01, \text{ind\_ISOPA0H})$    | see general notes* |
| H45035b_a01 | TrAa01ScC  | $\text{ISOPA0H(aq)} \rightarrow \text{ISOPA0H}$       | $k_{\text{exb}}(01, \text{ind\_ISOPA0H})$    | see general notes* |
| H45036f_a01 | TrAa01ScCN | $\text{ISOPBNO3} \rightarrow \text{ISOPBNO3(aq)}$     | $k_{\text{exf}}(01, \text{ind\_ISOPBNO3})$   | see general notes* |
| H45036b_a01 | TrAa01ScCN | $\text{ISOPBNO3(aq)} \rightarrow \text{ISOPBNO3}$     | $k_{\text{exb}}(01, \text{ind\_ISOPBNO3})$   | see general notes* |

Table 3: Reversible (Henry’s law) equilibria and irreversible (“heterogenous”) uptake

| #           | labels     | reaction                                | rate coefficient         | reference          |
|-------------|------------|-----------------------------------------|--------------------------|--------------------|
| H45037f_a01 | TrAa01ScC  | ISOPBOH $\rightarrow$ ISOPBOH(aq)       | k_exf(01,ind_ISOPBOH)    | see general notes* |
| H45037b_a01 | TrAa01ScC  | ISOPBOH(aq) $\rightarrow$ ISOPBOH       | k_exb(01,ind_ISOPBOH)    | see general notes* |
| H45038f_a01 | TrAa01ScC  | ISOPBOOH $\rightarrow$ ISOPBOOH(aq)     | k_exf(01,ind_ISOPBOOH)   | see general notes* |
| H45038b_a01 | TrAa01ScC  | ISOPBOOH(aq) $\rightarrow$ ISOPBOOH     | k_exb(01,ind_ISOPBOOH)   | see general notes* |
| H45039f_a01 | TrAa01ScCN | ISOPDNO3 $\rightarrow$ ISOPDNO3(aq)     | k_exf(01,ind_ISOPDNO3)   | see general notes* |
| H45039b_a01 | TrAa01ScCN | ISOPDNO3(aq) $\rightarrow$ ISOPDNO3     | k_exb(01,ind_ISOPDNO3)   | see general notes* |
| H45040f_a01 | TrAa01ScC  | ISOPDOH $\rightarrow$ ISOPDOH(aq)       | k_exf(01,ind_ISOPDOH)    | see general notes* |
| H45040b_a01 | TrAa01ScC  | ISOPDOH(aq) $\rightarrow$ ISOPDOH       | k_exb(01,ind_ISOPDOH)    | see general notes* |
| H45041f_a01 | TrAa01ScC  | ISOPDOOH $\rightarrow$ ISOPDOOH(aq)     | k_exf(01,ind_ISOPDOOH)   | see general notes* |
| H45041b_a01 | TrAa01ScC  | ISOPDOOH(aq) $\rightarrow$ ISOPDOOH     | k_exb(01,ind_ISOPDOOH)   | see general notes* |
| H45042f_a01 | TrAa01ScC  | LC578OOH $\rightarrow$ LC578OOH(aq)     | k_exf(01,ind_LC578OOH)   | see general notes* |
| H45042b_a01 | TrAa01ScC  | LC578OOH(aq) $\rightarrow$ LC578OOH     | k_exb(01,ind_LC578OOH)   | see general notes* |
| H45043f_a01 | TrAa01ScCN | LC5PAN1719 $\rightarrow$ LC5PAN1719(aq) | k_exf(01,ind_LC5PAN1719) | see general notes* |
| H45043b_a01 | TrAa01ScCN | LC5PAN1719(aq) $\rightarrow$ LC5PAN1719 | k_exb(01,ind_LC5PAN1719) | see general notes* |
| H45044f_a01 | TrAa01ScC  | LHC4ACCHO $\rightarrow$ LHC4ACCHO(aq)   | k_exf(01,ind_LHC4ACCHO)  | see general notes* |
| H45044b_a01 | TrAa01ScC  | LHC4ACCHO(aq) $\rightarrow$ LHC4ACCHO   | k_exb(01,ind_LHC4ACCHO)  | see general notes* |
| H45045f_a01 | TrAa01ScC  | LHC4ACCO2H $\rightarrow$ LHC4ACCO2H(aq) | k_exf(01,ind_LHC4ACCO2H) | see general notes* |
| H45045b_a01 | TrAa01ScC  | LHC4ACCO2H(aq) $\rightarrow$ LHC4ACCO2H | k_exb(01,ind_LHC4ACCO2H) | see general notes* |
| H45046f_a01 | TrAa01ScC  | LHC4ACCO3H $\rightarrow$ LHC4ACCO3H(aq) | k_exf(01,ind_LHC4ACCO3H) | see general notes* |
| H45046b_a01 | TrAa01ScC  | LHC4ACCO3H(aq) $\rightarrow$ LHC4ACCO3H | k_exb(01,ind_LHC4ACCO3H) | see general notes* |
| H45047f_a01 | TrAa01ScC  | LIEPOX $\rightarrow$ LIEPOX(aq)         | k_exf(01,ind_LIEPOX)     | see general notes* |
| H45047b_a01 | TrAa01ScC  | LIEPOX(aq) $\rightarrow$ LIEPOX         | k_exb(01,ind_LIEPOX)     | see general notes* |
| H45048f_a01 | TrAa01ScCN | LISOPACNO3 $\rightarrow$ LISOPACNO3(aq) | k_exf(01,ind_LISOPACNO3) | see general notes* |
| H45048b_a01 | TrAa01ScCN | LISOPACNO3(aq) $\rightarrow$ LISOPACNO3 | k_exb(01,ind_LISOPACNO3) | see general notes* |
| H45049f_a01 | TrAa01ScC  | LISOPACOOH $\rightarrow$ LISOPACOOH(aq) | k_exf(01,ind_LISOPACOOH) | see general notes* |
| H45049b_a01 | TrAa01ScC  | LISOPACOOH(aq) $\rightarrow$ LISOPACOOH | k_exb(01,ind_LISOPACOOH) | see general notes* |
| H45050f_a01 | TrAa01ScCN | LMBOABNO3 $\rightarrow$ LMBOABNO3(aq)   | k_exf(01,ind_LMBOABNO3)  | see general notes* |
| H45050b_a01 | TrAa01ScCN | LMBOABNO3(aq) $\rightarrow$ LMBOABNO3   | k_exb(01,ind_LMBOABNO3)  | see general notes* |
| H45051f_a01 | TrAa01ScC  | LMBOABOOH $\rightarrow$ LMBOABOOH(aq)   | k_exf(01,ind_LMBOABOOH)  | see general notes* |
| H45051b_a01 | TrAa01ScC  | LMBOABOOH(aq) $\rightarrow$ LMBOABOOH   | k_exb(01,ind_LMBOABOOH)  | see general notes* |
| H45052f_a01 | TrAa01ScCN | LNMBOABOOH $\rightarrow$ LNMBOABOOH(aq) | k_exf(01,ind_LNMBOABOOH) | see general notes* |
| H45052b_a01 | TrAa01ScCN | LNMBOABOOH(aq) $\rightarrow$ LNMBOABOOH | k_exb(01,ind_LNMBOABOOH) | see general notes* |
| H45053f_a01 | TrAa01ScC  | MBO $\rightarrow$ MBO(aq)               | k_exf(01,ind_MBO)        | see general notes* |
| H45053b_a01 | TrAa01ScC  | MBO(aq) $\rightarrow$ MBO               | k_exb(01,ind_MBO)        | see general notes* |
| H45054f_a01 | TrAa01ScC  | MBOACO $\rightarrow$ MBOACO(aq)         | k_exf(01,ind_MBOACO)     | see general notes* |



Table 3: Reversible (Henry’s law) equilibria and irreversible (“heterogenous”) uptake

| #           | labels     | reaction                                        | rate coefficient             | reference          |
|-------------|------------|-------------------------------------------------|------------------------------|--------------------|
| H45054b_a01 | TrAa01ScC  | MBOACO(aq) $\rightarrow$ MBOACO                 | k_exb(01,ind_MBOACO)         | see general notes* |
| H45055f_a01 | TrAa01ScC  | MBOCOCO $\rightarrow$ MBOCOCO(aq)               | k_exf(01,ind_MBOCOCO)        | see general notes* |
| H45055b_a01 | TrAa01ScC  | MBOCOCO(aq) $\rightarrow$ MBOCOCO               | k_exb(01,ind_MBOCOCO)        | see general notes* |
| H45056f_a01 | TrAa01ScC  | MC3ODBCO2H $\rightarrow$ MC3ODBCO2H(aq)         | k_exf(01,ind_MC3ODBCO2H)     | see general notes* |
| H45056b_a01 | TrAa01ScC  | MC3ODBCO2H(aq) $\rightarrow$ MC3ODBCO2H         | k_exb(01,ind_MC3ODBCO2H)     | see general notes* |
| H45057f_a01 | TrAa01ScC  | 3METHYLFURAN $\rightarrow$ 3METHYLFURAN(aq)     | k_exf(01,ind_ME3FURAN)       | see general notes* |
| H45057b_a01 | TrAa01ScC  | 3METHYLFURAN(aq) $\rightarrow$ 3METHYLFURAN     | k_exb(01,ind_ME3FURAN)       | see general notes* |
| H45058f_a01 | TrAa01ScC  | MMALNHYOOH $\rightarrow$ MMALNHYOOH(aq)         | k_exf(01,ind_MMALNHYOOH)     | see general notes* |
| H45058b_a01 | TrAa01ScC  | MMALNHYOOH(aq) $\rightarrow$ MMALNHYOOH         | k_exb(01,ind_MMALNHYOOH)     | see general notes* |
| H45059f_a01 | TrAa01ScCN | NC4MDCO2HN $\rightarrow$ NC4MDCO2HN(aq)         | k_exf(01,ind_NC4MDCO2H)      | see general notes* |
| H45059b_a01 | TrAa01ScCN | NC4MDCO2HN(aq) $\rightarrow$ NC4MDCO2HN         | k_exb(01,ind_NC4MDCO2H)      | see general notes* |
| H45060f_a01 | TrAa01ScCN | NC4OHCO3H $\rightarrow$ NC4OHCO3H(aq)           | k_exf(01,ind_NC4OHCO3H)      | see general notes* |
| H45060b_a01 | TrAa01ScCN | NC4OHCO3H(aq) $\rightarrow$ NC4OHCO3H           | k_exb(01,ind_NC4OHCO3H)      | see general notes* |
| H45061f_a01 | TrAa01ScCN | NC4OHCPAN $\rightarrow$ NC4OHCPAN(aq)           | k_exf(01,ind_NC4OHCPAN)      | see general notes* |
| H45061b_a01 | TrAa01ScCN | NC4OHCPAN(aq) $\rightarrow$ NC4OHCPAN           | k_exb(01,ind_NC4OHCPAN)      | see general notes* |
| H45062f_a01 | TrAa01ScCN | NISOPOOH $\rightarrow$ NISOPOOH(aq)             | k_exf(01,ind_NISOPOOH)       | see general notes* |
| H45062b_a01 | TrAa01ScCN | NISOPOOH(aq) $\rightarrow$ NISOPOOH             | k_exb(01,ind_NISOPOOH)       | see general notes* |
| H45063f_a01 | TrAa01ScCN | NMBOBCO $\rightarrow$ NMBOBCO(aq)               | k_exf(01,ind_NMBOBCO)        | see general notes* |
| H45063b_a01 | TrAa01ScCN | NMBOBCO(aq) $\rightarrow$ NMBOBCO               | k_exb(01,ind_NMBOBCO)        | see general notes* |
| H45064f_a01 | TrAa01ScCN | NTLFUOOH $\rightarrow$ NTLFUOOH(aq)             | k_exf(01,ind_NTLFUOOH)       | see general notes* |
| H45064b_a01 | TrAa01ScCN | NTLFUOOH(aq) $\rightarrow$ NTLFUOOH             | k_exb(01,ind_NTLFUOOH)       | see general notes* |
| H45065f_a01 | TrAa01ScC  | TLFUOOH $\rightarrow$ TLFUOOH(aq)               | k_exf(01,ind_TLFUOOH)        | see general notes* |
| H45065b_a01 | TrAa01ScC  | TLFUOOH(aq) $\rightarrow$ TLFUOOH               | k_exb(01,ind_TLFUOOH)        | see general notes* |
| H45066f_a01 | TrAa01ScC  | LZCO3HC23DBCOD $\rightarrow$ LZCO3HC23DBCOD(aq) | k_exf(01,ind_LZCO3HC23DBCOD) | see general notes* |
| H45066b_a01 | TrAa01ScC  | LZCO3HC23DBCOD(aq) $\rightarrow$ LZCO3HC23DBCOD | k_exb(01,ind_LZCO3HC23DBCOD) | see general notes* |
| H45067f_a01 | TrAa01ScC  | C4MDIAL $\rightarrow$ C4MDIAL(aq)               | k_exf(01,ind_C4MDIAL)        | see general notes* |
| H45067b_a01 | TrAa01ScC  | C4MDIAL(aq) $\rightarrow$ C4MDIAL               | k_exb(01,ind_C4MDIAL)        | see general notes* |
| H46000f_a01 | TrAa01ScCN | BZBIPERNO3 $\rightarrow$ BZBIPERNO3(aq)         | k_exf(01,ind_BZBIPERNO3)     | see general notes* |
| H46000b_a01 | TrAa01ScCN | BZBIPERNO3(aq) $\rightarrow$ BZBIPERNO3         | k_exb(01,ind_BZBIPERNO3)     | see general notes* |
| H46001f_a01 | TrAa01ScC  | BZBIPEROOH $\rightarrow$ BZBIPEROOH(aq)         | k_exf(01,ind_BZBIPEROOH)     | see general notes* |
| H46001b_a01 | TrAa01ScC  | BZBIPEROOH(aq) $\rightarrow$ BZBIPEROOH         | k_exb(01,ind_BZBIPEROOH)     | see general notes* |

Table 3: Reversible (Henry’s law) equilibria and irreversible (“heterogenous”) uptake

| #           | labels     | reaction                                | rate coefficient         | reference          |
|-------------|------------|-----------------------------------------|--------------------------|--------------------|
| H46002f_a01 | TrAa01ScC  | BZEMUCCO $\rightarrow$ BZEMUCCO(aq)     | k_exf(01,ind_BZEMUCCO)   | see general notes* |
| H46002b_a01 | TrAa01ScC  | BZEMUCCO(aq) $\rightarrow$ BZEMUCCO     | k_exb(01,ind_BZEMUCCO)   | see general notes* |
| H46003f_a01 | TrAa01ScC  | BZEMUCCO2H $\rightarrow$ BZEMUCCO2H(aq) | k_exf(01,ind_BZEMUCCO2H) | see general notes* |
| H46003b_a01 | TrAa01ScC  | BZEMUCCO2H(aq) $\rightarrow$ BZEMUCCO2H | k_exb(01,ind_BZEMUCCO2H) | see general notes* |
| H46004f_a01 | TrAa01ScC  | BZEMUCCO3H $\rightarrow$ BZEMUCCO3H(aq) | k_exf(01,ind_BZEMUCCO3H) | see general notes* |
| H46004b_a01 | TrAa01ScC  | BZEMUCCO3H(aq) $\rightarrow$ BZEMUCCO3H | k_exb(01,ind_BZEMUCCO3H) | see general notes* |
| H46005f_a01 | TrAa01ScCN | BZEMUCNO3 $\rightarrow$ BZEMUCNO3(aq)   | k_exf(01,ind_BZEMUCNO3)  | see general notes* |
| H46005b_a01 | TrAa01ScCN | BZEMUCNO3(aq) $\rightarrow$ BZEMUCNO3   | k_exb(01,ind_BZEMUCNO3)  | see general notes* |
| H46006f_a01 | TrAa01ScC  | BZEMUCOOH $\rightarrow$ BZEMUCOOH(aq)   | k_exf(01,ind_BZEMUCOOH)  | see general notes* |
| H46006b_a01 | TrAa01ScC  | BZEMUCOOH(aq) $\rightarrow$ BZEMUCOOH   | k_exb(01,ind_BZEMUCOOH)  | see general notes* |
| H46007f_a01 | TrAa01ScC  | BZEPOXMUC $\rightarrow$ BZEPOXMUC(aq)   | k_exf(01,ind_BZEPOXMUC)  | see general notes* |
| H46007b_a01 | TrAa01ScC  | BZEPOXMUC(aq) $\rightarrow$ BZEPOXMUC   | k_exb(01,ind_BZEPOXMUC)  | see general notes* |
| H46008f_a01 | TrAa01ScC  | BZOBIPEROH $\rightarrow$ BZOBIPEROH(aq) | k_exf(01,ind_BZOBIPEROH) | see general notes* |
| H46008b_a01 | TrAa01ScC  | BZOBIPEROH(aq) $\rightarrow$ BZOBIPEROH | k_exb(01,ind_BZOBIPEROH) | see general notes* |
| H46009f_a01 | TrAa01ScCN | C5CO2DBPAN $\rightarrow$ C5CO2DBPAN(aq) | k_exf(01,ind_C5CO2DBPAN) | see general notes* |
| H46009b_a01 | TrAa01ScCN | C5CO2DBPAN(aq) $\rightarrow$ C5CO2DBPAN | k_exb(01,ind_C5CO2DBPAN) | see general notes* |
| H46010f_a01 | TrAa01ScC  | C5CO2DCO3H $\rightarrow$ C5CO2DCO3H(aq) | k_exf(01,ind_C5CO2DCO3H) | see general notes* |
| H46010b_a01 | TrAa01ScC  | C5CO2DCO3H(aq) $\rightarrow$ C5CO2DCO3H | k_exb(01,ind_C5CO2DCO3H) | see general notes* |
| H46011f_a01 | TrAa01ScCN | C5CO2OHPAN $\rightarrow$ C5CO2OHPAN(aq) | k_exf(01,ind_C5CO2OHPAN) | see general notes* |
| H46011b_a01 | TrAa01ScCN | C5CO2OHPAN(aq) $\rightarrow$ C5CO2OHPAN | k_exb(01,ind_C5CO2OHPAN) | see general notes* |
| H46012f_a01 | TrAa01ScC  | C5COOHCO3H $\rightarrow$ C5COOHCO3H(aq) | k_exf(01,ind_C5COOHCO3H) | see general notes* |
| H46012b_a01 | TrAa01ScC  | C5COOHCO3H(aq) $\rightarrow$ C5COOHCO3H | k_exb(01,ind_C5COOHCO3H) | see general notes* |
| H46013f_a01 | TrAa01ScC  | C6125CO $\rightarrow$ C6125CO(aq)       | k_exf(01,ind_C6125CO)    | see general notes* |
| H46013b_a01 | TrAa01ScC  | C6125CO(aq) $\rightarrow$ C6125CO       | k_exb(01,ind_C6125CO)    | see general notes* |
| H46014f_a01 | TrAa01ScC  | C614CO $\rightarrow$ C614CO(aq)         | k_exf(01,ind_C614CO)     | see general notes* |
| H46014b_a01 | TrAa01ScC  | C614CO(aq) $\rightarrow$ C614CO         | k_exb(01,ind_C614CO)     | see general notes* |
| H46015f_a01 | TrAa01ScCN | C614NO3 $\rightarrow$ C614NO3(aq)       | k_exf(01,ind_C614NO3)    | see general notes* |
| H46015b_a01 | TrAa01ScCN | C614NO3(aq) $\rightarrow$ C614NO3       | k_exb(01,ind_C614NO3)    | see general notes* |
| H46016f_a01 | TrAa01ScC  | C614OOH $\rightarrow$ C614OOH(aq)       | k_exf(01,ind_C614OOH)    | see general notes* |
| H46016b_a01 | TrAa01ScC  | C614OOH(aq) $\rightarrow$ C614OOH       | k_exb(01,ind_C614OOH)    | see general notes* |
| H46017f_a01 | TrAa01ScC  | C615CO2OOH $\rightarrow$ C615CO2OOH(aq) | k_exf(01,ind_C615CO2OOH) | see general notes* |
| H46017b_a01 | TrAa01ScC  | C615CO2OOH(aq) $\rightarrow$ C615CO2OOH | k_exb(01,ind_C615CO2OOH) | see general notes* |
| H46018f_a01 | TrAa01ScC  | C6CO4DB $\rightarrow$ C6CO4DB(aq)       | k_exf(01,ind_C6CO4DB)    | see general notes* |
| H46018b_a01 | TrAa01ScC  | C6CO4DB(aq) $\rightarrow$ C6CO4DB       | k_exb(01,ind_C6CO4DB)    | see general notes* |
| H46019f_a01 | TrAa01ScC  | C6H5O $\rightarrow$ C6H5O(aq)           | k_exf(01,ind_C6H5O)      | see general notes* |

Table 3: Reversible (Henry’s law) equilibria and irreversible (“heterogenous”) uptake

| #           | labels     | reaction                                              | rate coefficient                             | reference          |
|-------------|------------|-------------------------------------------------------|----------------------------------------------|--------------------|
| H46019b_a01 | TrAa01ScC  | $\text{C6H5O(aq)} \rightarrow \text{C6H5O}$           | $k_{\text{exb}}(01, \text{ind\_C6H5O})$      | see general notes* |
| H46020f_a01 | TrAa01ScC  | $\text{C6H5OOH} \rightarrow \text{C6H5OOH(aq)}$       | $k_{\text{exf}}(01, \text{ind\_C6H5OOH})$    | see general notes* |
| H46020b_a01 | TrAa01ScC  | $\text{C6H5OOH(aq)} \rightarrow \text{C6H5OOH}$       | $k_{\text{exb}}(01, \text{ind\_C6H5OOH})$    | see general notes* |
| H46021f_a01 | TrAa01ScC  | $\text{CATEC1O} \rightarrow \text{CATEC1O(aq)}$       | $k_{\text{exf}}(01, \text{ind\_CATEC1O})$    | see general notes* |
| H46021b_a01 | TrAa01ScC  | $\text{CATEC1O(aq)} \rightarrow \text{CATEC1O}$       | $k_{\text{exb}}(01, \text{ind\_CATEC1O})$    | see general notes* |
| H46022f_a01 | TrAa01ScC  | $\text{CATEC1OOH} \rightarrow \text{CATEC1OOH(aq)}$   | $k_{\text{exf}}(01, \text{ind\_CATEC1OOH})$  | see general notes* |
| H46022b_a01 | TrAa01ScC  | $\text{CATEC1OOH(aq)} \rightarrow \text{CATEC1OOH}$   | $k_{\text{exb}}(01, \text{ind\_CATEC1OOH})$  | see general notes* |
| H46023f_a01 | TrAa01ScC  | $\text{CATECHOL} \rightarrow \text{CATECHOL(aq)}$     | $k_{\text{exf}}(01, \text{ind\_CATECHOL})$   | see general notes* |
| H46023b_a01 | TrAa01ScC  | $\text{CATECHOL(aq)} \rightarrow \text{CATECHOL}$     | $k_{\text{exb}}(01, \text{ind\_CATECHOL})$   | see general notes* |
| H46024f_a01 | TrAa01ScC  | $\text{CO235C5CHO} \rightarrow \text{CO235C5CHO(aq)}$ | $k_{\text{exf}}(01, \text{ind\_CO235C5CHO})$ | see general notes* |
| H46024b_a01 | TrAa01ScC  | $\text{CO235C5CHO(aq)} \rightarrow \text{CO235C5CHO}$ | $k_{\text{exb}}(01, \text{ind\_CO235C5CHO})$ | see general notes* |
| H46025f_a01 | TrAa01ScC  | $\text{CO235C6OOH} \rightarrow \text{CO235C6OOH(aq)}$ | $k_{\text{exf}}(01, \text{ind\_CO235C6OOH})$ | see general notes* |
| H46025b_a01 | TrAa01ScC  | $\text{CO235C6OOH(aq)} \rightarrow \text{CO235C6OOH}$ | $k_{\text{exb}}(01, \text{ind\_CO235C6OOH})$ | see general notes* |
| H46026f_a01 | TrAa01ScCN | $\text{DNPHEN} \rightarrow \text{DNPHEN(aq)}$         | $k_{\text{exf}}(01, \text{ind\_DNPHEN})$     | see general notes* |
| H46026b_a01 | TrAa01ScCN | $\text{DNPHEN(aq)} \rightarrow \text{DNPHEN}$         | $k_{\text{exb}}(01, \text{ind\_DNPHEN})$     | see general notes* |
| H46027f_a01 | TrAa01ScCN | $\text{DNPHENOOH} \rightarrow \text{DNPHENOOH(aq)}$   | $k_{\text{exf}}(01, \text{ind\_DNPHENOOH})$  | see general notes* |
| H46027b_a01 | TrAa01ScCN | $\text{DNPHENOOH(aq)} \rightarrow \text{DNPHENOOH}$   | $k_{\text{exb}}(01, \text{ind\_DNPHENOOH})$  | see general notes* |
| H46028f_a01 | TrAa01ScCN | $\text{NBZQOOH} \rightarrow \text{NBZQOOH(aq)}$       | $k_{\text{exf}}(01, \text{ind\_NBZQOOH})$    | see general notes* |
| H46028b_a01 | TrAa01ScCN | $\text{NBZQOOH(aq)} \rightarrow \text{NBZQOOH}$       | $k_{\text{exb}}(01, \text{ind\_NBZQOOH})$    | see general notes* |
| H46029f_a01 | TrAa01ScCN | $\text{NCATECHOL} \rightarrow \text{NCATECHOL(aq)}$   | $k_{\text{exf}}(01, \text{ind\_NCATECHOL})$  | see general notes* |
| H46029b_a01 | TrAa01ScCN | $\text{NCATECHOL(aq)} \rightarrow \text{NCATECHOL}$   | $k_{\text{exb}}(01, \text{ind\_NCATECHOL})$  | see general notes* |
| H46030f_a01 | TrAa01ScCN | $\text{NCATECOOH} \rightarrow \text{NCATECOOH(aq)}$   | $k_{\text{exf}}(01, \text{ind\_NCATECOOH})$  | see general notes* |
| H46030b_a01 | TrAa01ScCN | $\text{NCATECOOH(aq)} \rightarrow \text{NCATECOOH}$   | $k_{\text{exb}}(01, \text{ind\_NCATECOOH})$  | see general notes* |
| H46031f_a01 | TrAa01ScCN | $\text{NDNPHENOOH} \rightarrow \text{NDNPHENOOH(aq)}$ | $k_{\text{exf}}(01, \text{ind\_NDNPHENOOH})$ | see general notes* |
| H46031b_a01 | TrAa01ScCN | $\text{NDNPHENOOH(aq)} \rightarrow \text{NDNPHENOOH}$ | $k_{\text{exb}}(01, \text{ind\_NDNPHENOOH})$ | see general notes* |
| H46032f_a01 | TrAa01ScCN | $\text{NNCATECOOH} \rightarrow \text{NNCATECOOH(aq)}$ | $k_{\text{exf}}(01, \text{ind\_NNCATECOOH})$ | see general notes* |
| H46032b_a01 | TrAa01ScCN | $\text{NNCATECOOH(aq)} \rightarrow \text{NNCATECOOH}$ | $k_{\text{exb}}(01, \text{ind\_NNCATECOOH})$ | see general notes* |
| H46033f_a01 | TrAa01ScCN | $\text{NPHENOOH} \rightarrow \text{NPHENOOH(aq)}$     | $k_{\text{exf}}(01, \text{ind\_NPHENOOH})$   | see general notes* |
| H46033b_a01 | TrAa01ScCN | $\text{NPHENOOH(aq)} \rightarrow \text{NPHENOOH}$     | $k_{\text{exb}}(01, \text{ind\_NPHENOOH})$   | see general notes* |
| H46034f_a01 | TrAa01ScC  | $\text{PBZQCO} \rightarrow \text{PBZQCO(aq)}$         | $k_{\text{exf}}(01, \text{ind\_PBZQCO})$     | see general notes* |
| H46034b_a01 | TrAa01ScC  | $\text{PBZQCO(aq)} \rightarrow \text{PBZQCO}$         | $k_{\text{exb}}(01, \text{ind\_PBZQCO})$     | see general notes* |
| H46035f_a01 | TrAa01ScC  | $\text{PBZQOOH} \rightarrow \text{PBZQOOH(aq)}$       | $k_{\text{exf}}(01, \text{ind\_PBZQOOH})$    | see general notes* |
| H46035b_a01 | TrAa01ScC  | $\text{PBZQOOH(aq)} \rightarrow \text{PBZQOOH}$       | $k_{\text{exb}}(01, \text{ind\_PBZQOOH})$    | see general notes* |
| H46036f_a01 | TrAa01ScC  | $\text{PHENOL} \rightarrow \text{PHENOL(aq)}$         | $k_{\text{exf}}(01, \text{ind\_PHENOL})$     | see general notes* |
| H46036b_a01 | TrAa01ScC  | $\text{PHENOL(aq)} \rightarrow \text{PHENOL}$         | $k_{\text{exb}}(01, \text{ind\_PHENOL})$     | see general notes* |

Table 3: Reversible (Henry’s law) equilibria and irreversible (“heterogenous”) uptake

| #           | labels     | reaction                                | rate coefficient         | reference          |
|-------------|------------|-----------------------------------------|--------------------------|--------------------|
| H46037f_a01 | TrAa01ScC  | PHENOOH $\rightarrow$ PHENOOH(aq)       | k_exf(01,ind_PHENOOH)    | see general notes* |
| H46037b_a01 | TrAa01ScC  | PHENOOH(aq) $\rightarrow$ PHENOOH       | k_exb(01,ind_PHENOOH)    | see general notes* |
| H460MSf_a01 | TrAa01ScCN | HOC6H4NO2 $\rightarrow$ HOC6H4NO2(aq)   | k_exf(01,ind_HOC6H4NO2)  | see general notes* |
| H461MSb_a01 | TrAa01ScCN | HOC6H4NO2(aq) $\rightarrow$ HOC6H4NO2   | k_exb(01,ind_HOC6H4NO2)  | see general notes* |
| H47000f_a01 | TrAa01ScC  | C235C6CO3H $\rightarrow$ C235C6CO3H(aq) | k_exf(01,ind_C235C6CO3H) | see general notes* |
| H47000b_a01 | TrAa01ScC  | C235C6CO3H(aq) $\rightarrow$ C235C6CO3H | k_exb(01,ind_C235C6CO3H) | see general notes* |
| H47001f_a01 | TrAa01ScCN | C6CO2OHPAN $\rightarrow$ C6CO2OHPAN(aq) | k_exf(01,ind_C6CO2OHPAN) | see general notes* |
| H47001b_a01 | TrAa01ScCN | C6CO2OHPAN(aq) $\rightarrow$ C6CO2OHPAN | k_exb(01,ind_C6CO2OHPAN) | see general notes* |
| H47002f_a01 | TrAa01ScC  | C6COOHCO3H $\rightarrow$ C6COOHCO3H(aq) | k_exf(01,ind_C6COOHCO3H) | see general notes* |
| H47002b_a01 | TrAa01ScC  | C6COOHCO3H(aq) $\rightarrow$ C6COOHCO3H | k_exb(01,ind_C6COOHCO3H) | see general notes* |
| H47003f_a01 | TrAa01ScC  | C6H5CH2OOH $\rightarrow$ C6H5CH2OOH(aq) | k_exf(01,ind_C6H5CH2OOH) | see general notes* |
| H47003b_a01 | TrAa01ScC  | C6H5CH2OOH(aq) $\rightarrow$ C6H5CH2OOH | k_exb(01,ind_C6H5CH2OOH) | see general notes* |
| H47004f_a01 | TrAa01ScC  | C6H5CO3H $\rightarrow$ C6H5CO3H(aq)     | k_exf(01,ind_C6H5CO3H)   | see general notes* |
| H47004b_a01 | TrAa01ScC  | C6H5CO3H(aq) $\rightarrow$ C6H5CO3H     | k_exb(01,ind_C6H5CO3H)   | see general notes* |
| H47005f_a01 | TrAa01ScC  | C716OOH $\rightarrow$ C716OOH(aq)       | k_exf(01,ind_C716OOH)    | see general notes* |
| H47005b_a01 | TrAa01ScC  | C716OOH(aq) $\rightarrow$ C716OOH       | k_exb(01,ind_C716OOH)    | see general notes* |
| H47006f_a01 | TrAa01ScC  | C721OOH $\rightarrow$ C721OOH(aq)       | k_exf(01,ind_C721OOH)    | see general notes* |
| H47006b_a01 | TrAa01ScC  | C721OOH(aq) $\rightarrow$ C721OOH       | k_exb(01,ind_C721OOH)    | see general notes* |
| H47007f_a01 | TrAa01ScC  | C722OOH $\rightarrow$ C722OOH(aq)       | k_exf(01,ind_C722OOH)    | see general notes* |
| H47007b_a01 | TrAa01ScC  | C722OOH(aq) $\rightarrow$ C722OOH       | k_exb(01,ind_C722OOH)    | see general notes* |
| H47008f_a01 | TrAa01ScC  | C7CO4DB $\rightarrow$ C7CO4DB(aq)       | k_exf(01,ind_C7CO4DB)    | see general notes* |
| H47008b_a01 | TrAa01ScC  | C7CO4DB(aq) $\rightarrow$ C7CO4DB       | k_exb(01,ind_C7CO4DB)    | see general notes* |
| H47009f_a01 | TrAa01ScCN | C7PAN3 $\rightarrow$ C7PAN3(aq)         | k_exf(01,ind_C7PAN3)     | see general notes* |
| H47009b_a01 | TrAa01ScCN | C7PAN3(aq) $\rightarrow$ C7PAN3         | k_exb(01,ind_C7PAN3)     | see general notes* |
| H47010f_a01 | TrAa01ScC  | CO235C6CHO $\rightarrow$ CO235C6CHO(aq) | k_exf(01,ind_CO235C6CHO) | see general notes* |
| H47010b_a01 | TrAa01ScC  | CO235C6CHO(aq) $\rightarrow$ CO235C6CHO | k_exb(01,ind_CO235C6CHO) | see general notes* |
| H47011f_a01 | TrAa01ScC  | CRESOL $\rightarrow$ CRESOL(aq)         | k_exf(01,ind_CRESOL)     | see general notes* |
| H47011b_a01 | TrAa01ScC  | CRESOL(aq) $\rightarrow$ CRESOL         | k_exb(01,ind_CRESOL)     | see general notes* |
| H47012f_a01 | TrAa01ScC  | CRESOOH $\rightarrow$ CRESOOH(aq)       | k_exf(01,ind_CRESOOH)    | see general notes* |
| H47012b_a01 | TrAa01ScC  | CRESOOH(aq) $\rightarrow$ CRESOOH       | k_exb(01,ind_CRESOOH)    | see general notes* |
| H47013f_a01 | TrAa01ScCN | DNCRES $\rightarrow$ DNCRES(aq)         | k_exf(01,ind_DNCRES)     | see general notes* |
| H47013b_a01 | TrAa01ScCN | DNCRES(aq) $\rightarrow$ DNCRES         | k_exb(01,ind_DNCRES)     | see general notes* |
| H47014f_a01 | TrAa01ScCN | DNCRESOOH $\rightarrow$ DNCRESOOH(aq)   | k_exf(01,ind_DNCRESOOH)  | see general notes* |
| H47014b_a01 | TrAa01ScCN | DNCRESOOH(aq) $\rightarrow$ DNCRESOOH   | k_exb(01,ind_DNCRESOOH)  | see general notes* |
| H47015f_a01 | TrAa01ScC  | MCATEC1O $\rightarrow$ MCATEC1O(aq)     | k_exf(01,ind_MCATEC1O)   | see general notes* |

Table 3: Reversible (Henry’s law) equilibria and irreversible (“heterogenous”) uptake

| #           | labels     | reaction                                | rate coefficient         | reference          |
|-------------|------------|-----------------------------------------|--------------------------|--------------------|
| H47015b_a01 | TrAa01ScC  | MCATEC1O(aq) $\rightarrow$ MCATEC1O     | k_exb(01,ind_MCATEC1O)   | see general notes* |
| H47016f_a01 | TrAa01ScC  | MCATEC1OOH $\rightarrow$ MCATEC1OOH(aq) | k_exf(01,ind_MCATEC1OOH) | see general notes* |
| H47016b_a01 | TrAa01ScC  | MCATEC1OOH(aq) $\rightarrow$ MCATEC1OOH | k_exb(01,ind_MCATEC1OOH) | see general notes* |
| H47017f_a01 | TrAa01ScC  | MCATECHOL $\rightarrow$ MCATECHOL(aq)   | k_exf(01,ind_MCATECHOL)  | see general notes* |
| H47017b_a01 | TrAa01ScC  | MCATECHOL(aq) $\rightarrow$ MCATECHOL   | k_exb(01,ind_MCATECHOL)  | see general notes* |
| H47018f_a01 | TrAa01ScCN | MNCATECH $\rightarrow$ MNCATECH(aq)     | k_exf(01,ind_MNCATECH)   | see general notes* |
| H47018b_a01 | TrAa01ScCN | MNCATECH(aq) $\rightarrow$ MNCATECH     | k_exb(01,ind_MNCATECH)   | see general notes* |
| H47019f_a01 | TrAa01ScCN | MNCATECOOH $\rightarrow$ MNCATECOOH(aq) | k_exf(01,ind_MNCATECOOH) | see general notes* |
| H47019b_a01 | TrAa01ScCN | MNCATECOOH(aq) $\rightarrow$ MNCATECOOH | k_exb(01,ind_MNCATECOOH) | see general notes* |
| H47020f_a01 | TrAa01ScCN | MNNCATCOOH $\rightarrow$ MNNCATCOOH(aq) | k_exf(01,ind_MNNCATCOOH) | see general notes* |
| H47020b_a01 | TrAa01ScCN | MNNCATCOOH(aq) $\rightarrow$ MNNCATCOOH | k_exb(01,ind_MNNCATCOOH) | see general notes* |
| H47021f_a01 | TrAa01ScCN | NCRESOOH $\rightarrow$ NCRESOOH(aq)     | k_exf(01,ind_NCRESOOH)   | see general notes* |
| H47021b_a01 | TrAa01ScCN | NCRESOOH(aq) $\rightarrow$ NCRESOOH     | k_exb(01,ind_NCRESOOH)   | see general notes* |
| H47022f_a01 | TrAa01ScCN | NDNCRESOOH $\rightarrow$ NDNCRESOOH(aq) | k_exf(01,ind_NDNCRESOOH) | see general notes* |
| H47022b_a01 | TrAa01ScCN | NDNCRESOOH(aq) $\rightarrow$ NDNCRESOOH | k_exb(01,ind_NDNCRESOOH) | see general notes* |
| H47023f_a01 | TrAa01ScC  | OXYL1OOH $\rightarrow$ OXYL1OOH(aq)     | k_exf(01,ind_OXYL1OOH)   | see general notes* |
| H47023b_a01 | TrAa01ScC  | OXYL1OOH(aq) $\rightarrow$ OXYL1OOH     | k_exb(01,ind_OXYL1OOH)   | see general notes* |
| H47024f_a01 | TrAa01ScC  | PHCOOH $\rightarrow$ PHCOOH(aq)         | k_exf(01,ind_PHCOOH)     | see general notes* |
| H47024b_a01 | TrAa01ScC  | PHCOOH(aq) $\rightarrow$ PHCOOH         | k_exb(01,ind_PHCOOH)     | see general notes* |
| H47025f_a01 | TrAa01ScC  | TLBIPEROOH $\rightarrow$ TLBIPEROOH(aq) | k_exf(01,ind_TLBIPEROOH) | see general notes* |
| H47025b_a01 | TrAa01ScC  | TLBIPEROOH(aq) $\rightarrow$ TLBIPEROOH | k_exb(01,ind_TLBIPEROOH) | see general notes* |
| H47026f_a01 | TrAa01ScC  | TLEMUCCO $\rightarrow$ TLEMUCCO(aq)     | k_exf(01,ind_TLEMUCCO)   | see general notes* |
| H47026b_a01 | TrAa01ScC  | TLEMUCCO(aq) $\rightarrow$ TLEMUCCO     | k_exb(01,ind_TLEMUCCO)   | see general notes* |
| H47027f_a01 | TrAa01ScC  | TLEMUCCO2H $\rightarrow$ TLEMUCCO2H(aq) | k_exf(01,ind_TLEMUCCO2H) | see general notes* |
| H47027b_a01 | TrAa01ScC  | TLEMUCCO2H(aq) $\rightarrow$ TLEMUCCO2H | k_exb(01,ind_TLEMUCCO2H) | see general notes* |
| H47028f_a01 | TrAa01ScC  | TLEMUCCO3H $\rightarrow$ TLEMUCCO3H(aq) | k_exf(01,ind_TLEMUCCO3H) | see general notes* |
| H47028b_a01 | TrAa01ScC  | TLEMUCCO3H(aq) $\rightarrow$ TLEMUCCO3H | k_exb(01,ind_TLEMUCCO3H) | see general notes* |
| H47029f_a01 | TrAa01ScCN | TLEMUCNO3 $\rightarrow$ TLEMUCNO3(aq)   | k_exf(01,ind_TLEMUCNO3)  | see general notes* |
| H47029b_a01 | TrAa01ScCN | TLEMUCNO3(aq) $\rightarrow$ TLEMUCNO3   | k_exb(01,ind_TLEMUCNO3)  | see general notes* |
| H47030f_a01 | TrAa01ScC  | TLEMUCOOH $\rightarrow$ TLEMUCOOH(aq)   | k_exf(01,ind_TLEMUCOOH)  | see general notes* |
| H47030b_a01 | TrAa01ScC  | TLEMUCOOH(aq) $\rightarrow$ TLEMUCOOH   | k_exb(01,ind_TLEMUCOOH)  | see general notes* |
| H47031f_a01 | TrAa01ScC  | TLOBIPEROH $\rightarrow$ TLOBIPEROH(aq) | k_exf(01,ind_TLOBIPEROH) | see general notes* |
| H47031b_a01 | TrAa01ScC  | TLOBIPEROH(aq) $\rightarrow$ TLOBIPEROH | k_exb(01,ind_TLOBIPEROH) | see general notes* |
| H47032f_a01 | TrAa01ScC  | TOL1O $\rightarrow$ TOL1O(aq)           | k_exf(01,ind_TOL1O)      | see general notes* |
| H47032b_a01 | TrAa01ScC  | TOL1O(aq) $\rightarrow$ TOL1O           | k_exb(01,ind_TOL1O)      | see general notes* |

Table 3: Reversible (Henry’s law) equilibria and irreversible (“heterogenous”) uptake

| #           | labels     | reaction                  | rate coefficient        | reference          |
|-------------|------------|---------------------------|-------------------------|--------------------|
| H48000f_a01 | TrAa01ScC  | C721CHO → C721CHO(aq)     | k_exf(01,ind_C721CHO)   | see general notes* |
| H48000b_a01 | TrAa01ScC  | C721CHO(aq) → C721CHO     | k_exb(01,ind_C721CHO)   | see general notes* |
| H48001f_a01 | TrAa01ScC  | C721CO3H → C721CO3H(aq)   | k_exf(01,ind_C721CO3H)  | see general notes* |
| H48001b_a01 | TrAa01ScC  | C721CO3H(aq) → C721CO3H   | k_exb(01,ind_C721CO3H)  | see general notes* |
| H48002f_a01 | TrAa01ScCN | C721PAN → C721PAN(aq)     | k_exf(01,ind_C721PAN)   | see general notes* |
| H48002b_a01 | TrAa01ScCN | C721PAN(aq) → C721PAN     | k_exb(01,ind_C721PAN)   | see general notes* |
| H48003f_a01 | TrAa01ScCN | C810NO3 → C810NO3(aq)     | k_exf(01,ind_C810NO3)   | see general notes* |
| H48003b_a01 | TrAa01ScCN | C810NO3(aq) → C810NO3     | k_exb(01,ind_C810NO3)   | see general notes* |
| H48004f_a01 | TrAa01ScC  | C810OOH → C810OOH(aq)     | k_exf(01,ind_C810OOH)   | see general notes* |
| H48004b_a01 | TrAa01ScC  | C810OOH(aq) → C810OOH     | k_exb(01,ind_C810OOH)   | see general notes* |
| H48005f_a01 | TrAa01ScC  | C812OOH → C812OOH(aq)     | k_exf(01,ind_C812OOH)   | see general notes* |
| H48005b_a01 | TrAa01ScC  | C812OOH(aq) → C812OOH     | k_exb(01,ind_C812OOH)   | see general notes* |
| H48006f_a01 | TrAa01ScC  | C813OOH → C813OOH(aq)     | k_exf(01,ind_C813OOH)   | see general notes* |
| H48006b_a01 | TrAa01ScC  | C813OOH(aq) → C813OOH     | k_exb(01,ind_C813OOH)   | see general notes* |
| H48007f_a01 | TrAa01ScC  | C85OOH → C85OOH(aq)       | k_exf(01,ind_C85OOH)    | see general notes* |
| H48007b_a01 | TrAa01ScC  | C85OOH(aq) → C85OOH       | k_exb(01,ind_C85OOH)    | see general notes* |
| H48008f_a01 | TrAa01ScC  | C86OOH → C86OOH(aq)       | k_exf(01,ind_C86OOH)    | see general notes* |
| H48008b_a01 | TrAa01ScC  | C86OOH(aq) → C86OOH       | k_exb(01,ind_C86OOH)    | see general notes* |
| H48009f_a01 | TrAa01ScCN | C89NO3 → C89NO3(aq)       | k_exf(01,ind_C89NO3)    | see general notes* |
| H48009b_a01 | TrAa01ScCN | C89NO3(aq) → C89NO3       | k_exb(01,ind_C89NO3)    | see general notes* |
| H48010f_a01 | TrAa01ScC  | C89OOH → C89OOH(aq)       | k_exf(01,ind_C89OOH)    | see general notes* |
| H48010b_a01 | TrAa01ScC  | C89OOH(aq) → C89OOH       | k_exb(01,ind_C89OOH)    | see general notes* |
| H48011f_a01 | TrAa01ScC  | C8BC → C8BC(aq)           | k_exf(01,ind_C8BC)      | see general notes* |
| H48011b_a01 | TrAa01ScC  | C8BC(aq) → C8BC           | k_exb(01,ind_C8BC)      | see general notes* |
| H48012f_a01 | TrAa01ScC  | C8BCCO → C8BCCO(aq)       | k_exf(01,ind_C8BCCO)    | see general notes* |
| H48012b_a01 | TrAa01ScC  | C8BCCO(aq) → C8BCCO       | k_exb(01,ind_C8BCCO)    | see general notes* |
| H48013f_a01 | TrAa01ScCN | C8BCNO3 → C8BCNO3(aq)     | k_exf(01,ind_C8BCNO3)   | see general notes* |
| H48013b_a01 | TrAa01ScCN | C8BCNO3(aq) → C8BCNO3     | k_exb(01,ind_C8BCNO3)   | see general notes* |
| H48014f_a01 | TrAa01ScC  | C8BCOOH → C8BCOOH(aq)     | k_exf(01,ind_C8BCOOH)   | see general notes* |
| H48014b_a01 | TrAa01ScC  | C8BCOOH(aq) → C8BCOOH     | k_exb(01,ind_C8BCOOH)   | see general notes* |
| H48015f_a01 | TrAa01ScC  | NORPINIC → NORPINIC(aq)   | k_exf(01,ind_NORPINIC)  | see general notes* |
| H48015b_a01 | TrAa01ScC  | NORPINIC(aq) → NORPINIC   | k_exb(01,ind_NORPINIC)  | see general notes* |
| H48016f_a01 | TrAa01ScC  | STYRENOOH → STYRENOOH(aq) | k_exf(01,ind_STYRENOOH) | see general notes* |
| H48016b_a01 | TrAa01ScC  | STYRENOOH(aq) → STYRENOOH | k_exb(01,ind_STYRENOOH) | see general notes* |
| H49000f_a01 | TrAa01ScC  | C811CO3H → C811CO3H(aq)   | k_exf(01,ind_C811CO3H)  | see general notes* |

Table 3: Reversible (Henry’s law) equilibria and irreversible (“heterogenous”) uptake

| #           | labels     | reaction                                              | rate coefficient                             | reference          |
|-------------|------------|-------------------------------------------------------|----------------------------------------------|--------------------|
| H49000b_a01 | TrAa01ScC  | $\text{C811CO3H(aq)} \rightarrow \text{C811CO3H}$     | $k_{\text{exb}}(01, \text{ind\_C811CO3H})$   | see general notes* |
| H49001f_a01 | TrAa01ScCN | $\text{C811PAN} \rightarrow \text{C811PAN(aq)}$       | $k_{\text{exf}}(01, \text{ind\_C811PAN})$    | see general notes* |
| H49001b_a01 | TrAa01ScCN | $\text{C811PAN(aq)} \rightarrow \text{C811PAN}$       | $k_{\text{exb}}(01, \text{ind\_C811PAN})$    | see general notes* |
| H49002f_a01 | TrAa01ScC  | $\text{C85CO3H} \rightarrow \text{C85CO3H(aq)}$       | $k_{\text{exf}}(01, \text{ind\_C85CO3H})$    | see general notes* |
| H49002b_a01 | TrAa01ScC  | $\text{C85CO3H(aq)} \rightarrow \text{C85CO3H}$       | $k_{\text{exb}}(01, \text{ind\_C85CO3H})$    | see general notes* |
| H49003f_a01 | TrAa01ScC  | $\text{C89CO2H} \rightarrow \text{C89CO2H(aq)}$       | $k_{\text{exf}}(01, \text{ind\_C89CO2H})$    | see general notes* |
| H49003b_a01 | TrAa01ScC  | $\text{C89CO2H(aq)} \rightarrow \text{C89CO2H}$       | $k_{\text{exb}}(01, \text{ind\_C89CO2H})$    | see general notes* |
| H49004f_a01 | TrAa01ScC  | $\text{C89CO3H} \rightarrow \text{C89CO3H(aq)}$       | $k_{\text{exf}}(01, \text{ind\_C89CO3H})$    | see general notes* |
| H49004b_a01 | TrAa01ScC  | $\text{C89CO3H(aq)} \rightarrow \text{C89CO3H}$       | $k_{\text{exb}}(01, \text{ind\_C89CO3H})$    | see general notes* |
| H49005f_a01 | TrAa01ScCN | $\text{C89PAN} \rightarrow \text{C89PAN(aq)}$         | $k_{\text{exf}}(01, \text{ind\_C89PAN})$     | see general notes* |
| H49005b_a01 | TrAa01ScCN | $\text{C89PAN(aq)} \rightarrow \text{C89PAN}$         | $k_{\text{exb}}(01, \text{ind\_C89PAN})$     | see general notes* |
| H49006f_a01 | TrAa01ScCN | $\text{C96NO3} \rightarrow \text{C96NO3(aq)}$         | $k_{\text{exf}}(01, \text{ind\_C96NO3})$     | see general notes* |
| H49006b_a01 | TrAa01ScCN | $\text{C96NO3(aq)} \rightarrow \text{C96NO3}$         | $k_{\text{exb}}(01, \text{ind\_C96NO3})$     | see general notes* |
| H49007f_a01 | TrAa01ScC  | $\text{C96OOH} \rightarrow \text{C96OOH(aq)}$         | $k_{\text{exf}}(01, \text{ind\_C96OOH})$     | see general notes* |
| H49007b_a01 | TrAa01ScC  | $\text{C96OOH(aq)} \rightarrow \text{C96OOH}$         | $k_{\text{exb}}(01, \text{ind\_C96OOH})$     | see general notes* |
| H49008f_a01 | TrAa01ScC  | $\text{C97OOH} \rightarrow \text{C97OOH(aq)}$         | $k_{\text{exf}}(01, \text{ind\_C97OOH})$     | see general notes* |
| H49008b_a01 | TrAa01ScC  | $\text{C97OOH(aq)} \rightarrow \text{C97OOH}$         | $k_{\text{exb}}(01, \text{ind\_C97OOH})$     | see general notes* |
| H49009f_a01 | TrAa01ScC  | $\text{C98OOH} \rightarrow \text{C98OOH(aq)}$         | $k_{\text{exf}}(01, \text{ind\_C98OOH})$     | see general notes* |
| H49009b_a01 | TrAa01ScC  | $\text{C98OOH(aq)} \rightarrow \text{C98OOH}$         | $k_{\text{exb}}(01, \text{ind\_C98OOH})$     | see general notes* |
| H49010f_a01 | TrAa01ScCN | $\text{C9PAN2} \rightarrow \text{C9PAN2(aq)}$         | $k_{\text{exf}}(01, \text{ind\_C9PAN2})$     | see general notes* |
| H49010b_a01 | TrAa01ScCN | $\text{C9PAN2(aq)} \rightarrow \text{C9PAN2}$         | $k_{\text{exb}}(01, \text{ind\_C9PAN2})$     | see general notes* |
| H49011f_a01 | TrAa01ScC  | $\text{NOPINDCO} \rightarrow \text{NOPINDCO(aq)}$     | $k_{\text{exf}}(01, \text{ind\_NOPINDCO})$   | see general notes* |
| H49011b_a01 | TrAa01ScC  | $\text{NOPINDCO(aq)} \rightarrow \text{NOPINDCO}$     | $k_{\text{exb}}(01, \text{ind\_NOPINDCO})$   | see general notes* |
| H49012f_a01 | TrAa01ScC  | $\text{NOPINDOOH} \rightarrow \text{NOPINDOOH(aq)}$   | $k_{\text{exf}}(01, \text{ind\_NOPINDOOH})$  | see general notes* |
| H49012b_a01 | TrAa01ScC  | $\text{NOPINDOOH(aq)} \rightarrow \text{NOPINDOOH}$   | $k_{\text{exb}}(01, \text{ind\_NOPINDOOH})$  | see general notes* |
| H49013f_a01 | TrAa01ScC  | $\text{NOPINONE} \rightarrow \text{NOPINONE(aq)}$     | $k_{\text{exf}}(01, \text{ind\_NOPINONE})$   | see general notes* |
| H49013b_a01 | TrAa01ScC  | $\text{NOPINONE(aq)} \rightarrow \text{NOPINONE}$     | $k_{\text{exb}}(01, \text{ind\_NOPINONE})$   | see general notes* |
| H49014f_a01 | TrAa01ScC  | $\text{NOPINOO} \rightarrow \text{NOPINOO(aq)}$       | $k_{\text{exf}}(01, \text{ind\_NOPINOO})$    | see general notes* |
| H49014b_a01 | TrAa01ScC  | $\text{NOPINOO(aq)} \rightarrow \text{NOPINOO}$       | $k_{\text{exb}}(01, \text{ind\_NOPINOO})$    | see general notes* |
| H49015f_a01 | TrAa01ScC  | $\text{NORPINAL} \rightarrow \text{NORPINAL(aq)}$     | $k_{\text{exf}}(01, \text{ind\_NORPINAL})$   | see general notes* |
| H49015b_a01 | TrAa01ScC  | $\text{NORPINAL(aq)} \rightarrow \text{NORPINAL}$     | $k_{\text{exb}}(01, \text{ind\_NORPINAL})$   | see general notes* |
| H49016f_a01 | TrAa01ScC  | $\text{NORPINENOL} \rightarrow \text{NORPINENOL(aq)}$ | $k_{\text{exf}}(01, \text{ind\_NORPINENOL})$ | see general notes* |
| H49016b_a01 | TrAa01ScC  | $\text{NORPINENOL(aq)} \rightarrow \text{NORPINENOL}$ | $k_{\text{exb}}(01, \text{ind\_NORPINENOL})$ | see general notes* |
| H49017f_a01 | TrAa01ScC  | $\text{PINIC} \rightarrow \text{PINIC(aq)}$           | $k_{\text{exf}}(01, \text{ind\_PINIC})$      | see general notes* |
| H49017b_a01 | TrAa01ScC  | $\text{PINIC(aq)} \rightarrow \text{PINIC}$           | $k_{\text{exb}}(01, \text{ind\_PINIC})$      | see general notes* |

Table 3: Reversible (Henry’s law) equilibria and irreversible (“heterogenous”) uptake

| #            | labels     | reaction                                        | rate coefficient             | reference          |
|--------------|------------|-------------------------------------------------|------------------------------|--------------------|
| H410000f_a01 | TrAa01ScCN | BPINANO3 $\rightarrow$ BPINANO3(aq)             | k_exf(01,ind_BPINANO3)       | see general notes* |
| H410000b_a01 | TrAa01ScCN | BPINANO3(aq) $\rightarrow$ BPINANO3             | k_exb(01,ind_BPINANO3)       | see general notes* |
| H410001f_a01 | TrAa01ScC  | BPINAOOH $\rightarrow$ BPINAOOH(aq)             | k_exf(01,ind_BPINAOOH)       | see general notes* |
| H410001b_a01 | TrAa01ScC  | BPINAOOH(aq) $\rightarrow$ BPINAOOH             | k_exb(01,ind_BPINAOOH)       | see general notes* |
| H410002f_a01 | TrAa01ScCN | C106NO3 $\rightarrow$ C106NO3(aq)               | k_exf(01,ind_C106NO3)        | see general notes* |
| H410002b_a01 | TrAa01ScCN | C106NO3(aq) $\rightarrow$ C106NO3               | k_exb(01,ind_C106NO3)        | see general notes* |
| H410003f_a01 | TrAa01ScC  | C106OOH $\rightarrow$ C106OOH(aq)               | k_exf(01,ind_C106OOH)        | see general notes* |
| H410003b_a01 | TrAa01ScC  | C106OOH(aq) $\rightarrow$ C106OOH               | k_exb(01,ind_C106OOH)        | see general notes* |
| H410004f_a01 | TrAa01ScC  | C109CO $\rightarrow$ C109CO(aq)                 | k_exf(01,ind_C109CO)         | see general notes* |
| H410004b_a01 | TrAa01ScC  | C109CO(aq) $\rightarrow$ C109CO                 | k_exb(01,ind_C109CO)         | see general notes* |
| H410005f_a01 | TrAa01ScC  | C109OOH $\rightarrow$ C109OOH(aq)               | k_exf(01,ind_C109OOH)        | see general notes* |
| H410005b_a01 | TrAa01ScC  | C109OOH(aq) $\rightarrow$ C109OOH               | k_exb(01,ind_C109OOH)        | see general notes* |
| H410006f_a01 | TrAa01ScCN | C10PAN2 $\rightarrow$ C10PAN2(aq)               | k_exf(01,ind_C10PAN2)        | see general notes* |
| H410006b_a01 | TrAa01ScCN | C10PAN2(aq) $\rightarrow$ C10PAN2               | k_exb(01,ind_C10PAN2)        | see general notes* |
| H410007f_a01 | TrAa01ScCN | LAPINABNO3 $\rightarrow$ LAPINABNO3(aq)         | k_exf(01,ind_LAPINABNO3)     | see general notes* |
| H410007b_a01 | TrAa01ScCN | LAPINABNO3(aq) $\rightarrow$ LAPINABNO3         | k_exb(01,ind_LAPINABNO3)     | see general notes* |
| H410008f_a01 | TrAa01ScC  | LAPINABOOH $\rightarrow$ LAPINABOOH(aq)         | k_exf(01,ind_LAPINABOOH)     | see general notes* |
| H410008b_a01 | TrAa01ScC  | LAPINABOOH(aq) $\rightarrow$ LAPINABOOH         | k_exb(01,ind_LAPINABOOH)     | see general notes* |
| H410009f_a01 | TrAa01ScCN | LNAPINABOOH $\rightarrow$ LNAPINABOOH(aq)       | k_exf(01,ind_LNAPINABOOH)    | see general notes* |
| H410009b_a01 | TrAa01ScCN | LNAPINABOOH(aq) $\rightarrow$ LNAPINABOOH       | k_exb(01,ind_LNAPINABOOH)    | see general notes* |
| H410010f_a01 | TrAa01ScCN | LNBPINABOOH $\rightarrow$ LNBPINABOOH(aq)       | k_exf(01,ind_LNBPINABOOH)    | see general notes* |
| H410010b_a01 | TrAa01ScCN | LNBPINABOOH(aq) $\rightarrow$ LNBPINABOOH       | k_exb(01,ind_LNBPINABOOH)    | see general notes* |
| H410011f_a01 | TrAa01ScC  | MENTHEN6ONE $\rightarrow$ MENTHEN6ONE(aq)       | k_exf(01,ind_MENTHEN6ONE)    | see general notes* |
| H410011b_a01 | TrAa01ScC  | MENTHEN6ONE(aq) $\rightarrow$ MENTHEN6ONE       | k_exb(01,ind_MENTHEN6ONE)    | see general notes* |
| H410012f_a01 | TrAa01ScC  | 2OHMENTHEN6ONE $\rightarrow$ 2OHMENTHEN6ONE(aq) | k_exf(01,ind_OH2MENTHEN6ONE) | see general notes* |
| H410012b_a01 | TrAa01ScC  | 2OHMENTHEN6ONE(aq) $\rightarrow$ 2OHMENTHEN6ONE | k_exb(01,ind_OH2MENTHEN6ONE) | see general notes* |
| H410013f_a01 | TrAa01ScC  | PERPINONIC $\rightarrow$ PERPINONIC(aq)         | k_exf(01,ind_PERPINONIC)     | see general notes* |
| H410013b_a01 | TrAa01ScC  | PERPINONIC(aq) $\rightarrow$ PERPINONIC         | k_exb(01,ind_PERPINONIC)     | see general notes* |
| H410014f_a01 | TrAa01ScC  | PINAL $\rightarrow$ PINAL(aq)                   | k_exf(01,ind_PINAL)          | see general notes* |
| H410014b_a01 | TrAa01ScC  | PINAL(aq) $\rightarrow$ PINAL                   | k_exb(01,ind_PINAL)          | see general notes* |
| H410015f_a01 | TrAa01ScCN | PINALNO3 $\rightarrow$ PINALNO3(aq)             | k_exf(01,ind_PINALNO3)       | see general notes* |
| H410015b_a01 | TrAa01ScCN | PINALNO3(aq) $\rightarrow$ PINALNO3             | k_exb(01,ind_PINALNO3)       | see general notes* |
| H410016f_a01 | TrAa01ScC  | PINALOOH $\rightarrow$ PINALOOH(aq)             | k_exf(01,ind_PINALOOH)       | see general notes* |



Table 3: Reversible (Henry’s law) equilibria and irreversible (“heterogenous”) uptake

| #            | labels           | reaction                                                                                                                 | rate coefficient                 | reference                                  |
|--------------|------------------|--------------------------------------------------------------------------------------------------------------------------|----------------------------------|--------------------------------------------|
| H410016b_a01 | TrAa01ScC        | PINALOOH(aq) $\rightarrow$ PINALOOH                                                                                      | k_exb(01,ind_PINALOOH)           | see general notes*                         |
| H410017f_a01 | TrAa01ScC        | PINEOL $\rightarrow$ PINEOL(aq)                                                                                          | k_exf(01,ind_PINENOL)            | see general notes*                         |
| H410017b_a01 | TrAa01ScC        | PINEOL(aq) $\rightarrow$ PINEOL                                                                                          | k_exb(01,ind_PINENOL)            | see general notes*                         |
| H410018f_a01 | TrAa01ScC        | PINONIC $\rightarrow$ PINONIC(aq)                                                                                        | k_exf(01,ind_PINONIC)            | see general notes*                         |
| H410018b_a01 | TrAa01ScC        | PINONIC(aq) $\rightarrow$ PINONIC                                                                                        | k_exb(01,ind_PINONIC)            | see general notes*                         |
| H410019f_a01 | TrAa01ScCN       | RO6R1NO3 $\rightarrow$ RO6R1NO3(aq)                                                                                      | k_exf(01,ind_RO6R1NO3)           | see general notes*                         |
| H410019b_a01 | TrAa01ScCN       | RO6R1NO3(aq) $\rightarrow$ RO6R1NO3                                                                                      | k_exb(01,ind_RO6R1NO3)           | see general notes*                         |
| H410020f_a01 | TrAa01ScCN       | ROO6R1NO3 $\rightarrow$ ROO6R1NO3(aq)                                                                                    | k_exf(01,ind_ROO6R1NO3)          | see general notes*                         |
| H410020b_a01 | TrAa01ScCN       | ROO6R1NO3(aq) $\rightarrow$ ROO6R1NO3                                                                                    | k_exb(01,ind_ROO6R1NO3)          | see general notes*                         |
| H60000f_a01  | TrAa01MblScCl    | Cl <sub>2</sub> $\rightarrow$ Cl <sub>2</sub> (aq)                                                                       | k_exf(01,ind_Cl2)                | see general notes*                         |
| H60000b_a01  | TrAa01MblScCl    | Cl <sub>2</sub> (aq) $\rightarrow$ Cl <sub>2</sub>                                                                       | k_exb(01,ind_Cl2)                | see general notes*                         |
| H62000f_a01  | TrAa01MblScScmCl | HCl $\rightarrow$ HCl(aq)                                                                                                | k_exf(01,ind_HCl)                | see general notes*                         |
| H62000b_a01  | TrAa01MblScScmCl | HCl(aq) $\rightarrow$ HCl                                                                                                | k_exb(01,ind_HCl)                | see general notes*                         |
| H62001f_a01  | TrAa01MblScCl    | HOCl $\rightarrow$ HOCl(aq)                                                                                              | k_exf(01,ind_HOCl)               | see general notes*                         |
| H62001b_a01  | TrAa01MblScCl    | HOCl(aq) $\rightarrow$ HOCl                                                                                              | k_exb(01,ind_HOCl)               | see general notes*                         |
| H63001_a01   | TrAa01MblClN     | ClNO <sub>3</sub> $\rightarrow$ HOCl(aq) + HNO <sub>3</sub> (aq)                                                         | k_exf_ClN03(01) * C(ind_H2O_a01) | see general notes*                         |
| H63002_a01   | TrAa01MblClN     | ClNO <sub>3</sub> + Cl <sup>-</sup> (aq) $\rightarrow$ Cl <sub>2</sub> (aq) + NO <sub>3</sub> <sup>-</sup> (aq)          | k_exf_ClN03(01) * 5.E2           | see general notes*                         |
| H631MS_a01   | TrAa01MblClN     | ClNO <sub>2</sub> $\rightarrow$ ClNO <sub>2</sub> (aq)                                                                   | k_exf(01,ind_ClN02)              | see general notes*                         |
| H632MS_a01   | TrAa01MblClN     | ClNO <sub>2</sub> (aq) $\rightarrow$ ClNO <sub>2</sub>                                                                   | k_exb(01,ind_ClN02)              | see general notes*                         |
| H633MS_a01   | TrAa01MblClN     | ClNO $\rightarrow$ ClNO(aq)                                                                                              | k_exf(01,ind_ClN0)               | see general notes*                         |
| H634MS_a01   | TrAa01MblClN     | ClNO(aq) $\rightarrow$ ClNO                                                                                              | k_exb(01,ind_ClN0)               | see general notes*                         |
| H70000f_a01  | TrAa01MblScBr    | Br <sub>2</sub> $\rightarrow$ Br <sub>2</sub> (aq)                                                                       | k_exf(01,ind_Br2)                | see general notes*                         |
| H70000b_a01  | TrAa01MblScBr    | Br <sub>2</sub> (aq) $\rightarrow$ Br <sub>2</sub>                                                                       | k_exb(01,ind_Br2)                | see general notes*                         |
| H72000f_a01  | TrAa01MblScScmBr | HBr $\rightarrow$ HBr(aq)                                                                                                | k_exf(01,ind_HBr)                | see general notes*                         |
| H72000b_a01  | TrAa01MblScScmBr | HBr(aq) $\rightarrow$ HBr                                                                                                | k_exb(01,ind_HBr)                | see general notes*                         |
| H72001f_a01  | TrAa01MblScBr    | HOBr $\rightarrow$ HOBr(aq)                                                                                              | k_exf(01,ind_HOBr)               | see general notes*                         |
| H72001b_a01  | TrAa01MblScBr    | HOBr(aq) $\rightarrow$ HOBr                                                                                              | k_exb(01,ind_HOBr)               | see general notes*                         |
| H73000_a01   | TrAa01MblBrN     | N <sub>2</sub> O <sub>5</sub> + Br <sup>-</sup> (aq) $\rightarrow$ BrNO <sub>2</sub> + NO <sub>3</sub> <sup>-</sup> (aq) | k_exf_N205(01) * 3.E5            | Behnke et al. (1994), Behnke et al. (1997) |
| H73001_a01   | TrAa01MblBrN     | BrNO <sub>3</sub> $\rightarrow$ HOBr(aq) + HNO <sub>3</sub> (aq)                                                         | k_exf_BrN03(01) * C(ind_H2O_a01) | see general notes*                         |
| H73002_a01   | TrAa01MblBrN     | BrNO <sub>3</sub> + Br <sup>-</sup> (aq) $\rightarrow$ Br <sub>2</sub> (aq) + NO <sub>3</sub> <sup>-</sup> (aq)          | k_exf_BrN03(01) * 3.E5           | see general notes*                         |
| H76000f_a01  | TrAa01MblScBrCl  | BrCl $\rightarrow$ BrCl(aq)                                                                                              | k_exf(01,ind_BrCl)               | see general notes*                         |
| H76000b_a01  | TrAa01MblScBrCl  | BrCl(aq) $\rightarrow$ BrCl                                                                                              | k_exb(01,ind_BrCl)               | see general notes*                         |
| H76001_a01   | TrAa01MblBrClN   | ClNO <sub>3</sub> + Br <sup>-</sup> (aq) $\rightarrow$ BrCl(aq) + NO <sub>3</sub> <sup>-</sup> (aq)                      | k_exf_ClN03(01) * 3.E5           | see general notes*                         |

Table 3: Reversible (Henry’s law) equilibria and irreversible (“heterogenous”) uptake

| #           | labels          | reaction                                                                                                 | rate coefficient                                              | reference          |
|-------------|-----------------|----------------------------------------------------------------------------------------------------------|---------------------------------------------------------------|--------------------|
| H76002_a01  | TrAa01MblBrClN  | $\text{BrNO}_3 + \text{Cl}^-(\text{aq}) \rightarrow \text{BrCl}(\text{aq}) + \text{NO}_3^-(\text{aq})$   | $k_{\text{exf\_BrNO3}}(01) * 5.E2$                            | see general notes* |
| H91000f_a01 | TrAa01MblScScmS | $\text{SO}_2 \rightarrow \text{SO}_2(\text{aq})$                                                         | $k_{\text{exf}}(01, \text{ind\_SO2})$                         | see general notes* |
| H91000b_a01 | TrAa01MblScScmS | $\text{SO}_2(\text{aq}) \rightarrow \text{SO}_2$                                                         | $k_{\text{exb}}(01, \text{ind\_SO2})$                         | see general notes* |
| H92000_a01  | TrAa01MblScScmS | $\text{H}_2\text{SO}_4 \rightarrow \text{H}_2\text{SO}_4(\text{aq})$                                     | $x_{\text{nom7sulf}} * k_{\text{exf}}(01, \text{ind\_H2SO4})$ | see general notes* |
| H94000f_a01 | TrAa01CS        | $\text{DMSO} \rightarrow \text{DMSO}(\text{aq})$                                                         | $k_{\text{exf}}(01, \text{ind\_DMSO})$                        | see general notes* |
| H94000b_a01 | TrAa01CS        | $\text{DMSO}(\text{aq}) \rightarrow \text{DMSO}$                                                         | $k_{\text{exb}}(01, \text{ind\_DMSO})$                        | see general notes* |
| H94001_a01  | TrAa01MblS      | $\text{CH}_3\text{SO}_3\text{H} \rightarrow \text{CH}_3\text{SO}_3^-(\text{aq}) + \text{H}^+(\text{aq})$ | $k_{\text{exf}}(01, \text{ind\_CH3SO3H})$                     | see general notes* |
| H94002f_a01 | TrAa01CS        | $\text{DMS} \rightarrow \text{DMS}(\text{aq})$                                                           | $k_{\text{exf}}(01, \text{ind\_DMS})$                         | see general notes* |
| H94002b_a01 | TrAa01CS        | $\text{DMS}(\text{aq}) \rightarrow \text{DMS}$                                                           | $k_{\text{exb}}(01, \text{ind\_DMS})$                         | see general notes* |

## General notes

The forward ( $k_{\text{exf}}$ ) and backward ( $k_{\text{exb}}$ ) rate coefficients are calculated in subroutine `mecca_aero_calc_k_ex` in the file `messy_mecca_aero.f90` using accommodation coefficients and Henry’s law constants from chemprop (see `chemprop.pdf`).

For uptake of X ( $X = \text{N}_2\text{O}_5$ ,  $\text{ClNO}_3$ , or  $\text{BrNO}_3$ ) and

subsequent reaction with  $\text{H}_2\text{O}$ ,  $\text{Cl}^-$ , and  $\text{Br}^-$  in H3201, H6300, H6301, H6302, H7300, H7301, H7302, H7601, and H7602, we define:

$$k_{\text{exf}}(\text{X}) = \frac{k_{\text{mt}}(\text{X}) \times \text{LWC}}{[\text{H}_2\text{O}] + 5 \times 10^2 [\text{Cl}^-] + 3 \times 10^5 [\text{Br}^-]}$$

Here,  $k_{\text{mt}}$  = mass transfer coefficient, and LWC = liquid water content of the aerosol. The total uptake rate of X is only determined by  $k_{\text{mt}}$ . The factors only affect

the branching between hydrolysis and the halide reactions. The factor  $5 \times 10^2$  was chosen such that the chloride reaction dominates over hydrolysis at about  $[\text{Cl}^-] > 0.1 \text{ M}$  (see Fig. 3 in Behnke et al. (1997)), i.e. when the ratio  $[\text{H}_2\text{O}]/[\text{Cl}^-]$  is less than  $5 \times 10^2$ . The ratio  $5 \times 10^2 / 3 \times 10^5$  was chosen such that the reactions with chloride and bromide are roughly equal for sea water composition (Behnke et al., 1994). These ratios were measured for uptake of  $\text{N}_2\text{O}_5$ . Here, they are also used for  $\text{ClNO}_3$  and  $\text{BrNO}_3$ .

Table 4: Heterogeneous reactions

| # | labels | reaction | rate coefficient | reference |
|---|--------|----------|------------------|-----------|
|---|--------|----------|------------------|-----------|

## General notes

Heterogeneous reaction rates are calculated with an external module (e.g., MECCA\_KHET) and then supplied to the MECCA chemistry (see [www.messy-interface.org](http://www.messy-interface.org) for details)

Table 5: Acid-base and other equilibria

| #          | labels          | reaction                                                                                              | $K_0[M^{m-n}]$ | $-\Delta H/R[K]$ | reference                           |
|------------|-----------------|-------------------------------------------------------------------------------------------------------|----------------|------------------|-------------------------------------|
| EQ2100_a01 | TrAa01Sc        | $\text{HO}_2 \rightleftharpoons \text{O}_2^- + \text{H}^+$                                            | 1.6E-5         |                  | Weinstein-Lloyd and Schwartz (1991) |
| EQ2101_a01 | TrAa01MblScScm  | $\text{H}_2\text{O} \rightleftharpoons \text{H}^+ + \text{OH}^-$                                      | 1.0E-16        | -6716            | Chameides (1984)                    |
| EQ2102_a01 | TrAa01Sc        | $\text{HO}_3 \rightleftharpoons \text{O}_3^- + \text{H}^+$                                            | 4.4E-9         |                  | Staehelin et al. (1984)             |
| EQ3200_a01 | TrAa01MblScScmN | $\text{NH}_4^+ \rightleftharpoons \text{H}^+ + \text{NH}_3$                                           | 5.88E-10       | -2391            | Chameides (1984)                    |
| EQ3201_a01 | TrAa01ScN       | $\text{HONO} \rightleftharpoons \text{H}^+ + \text{NO}_2^-$                                           | 5.1E-4         | -1260            | Schwartz and White (1981)           |
| EQ3202_a01 | TrAa01MblScScmN | $\text{HNO}_3 \rightleftharpoons \text{H}^+ + \text{NO}_3^-$                                          | 15             | 8700             | Davis and de Bruin (1964)           |
| EQ3203_a01 | TrAa01ScN       | $\text{HNO}_4 \rightleftharpoons \text{NO}_4^- + \text{H}^+$                                          | 1.E-5          |                  | Warneck (1999)                      |
| EQ4100_a01 | TrAa01MblScScm  | $\text{CO}_2 \rightleftharpoons \text{H}^+ + \text{HCO}_3^-$                                          | 4.3E-7         | -913             | Chameides (1984)*                   |
| EQ4101_a01 | TrAa01ScScm     | $\text{HCOOH} \rightleftharpoons \text{H}^+ + \text{HCOO}^-$                                          | 1.8E-4         |                  | Weast (1980)                        |
| EQ4150_a01 | TrAa01Sc        | $\text{HCHO} \rightleftharpoons \text{HOCH}_2\text{OH}$                                               | 4.11E-3        | -3769            | see note*                           |
| EQ4151_a01 | TrAa01Sc        | $\text{HCO}_3 \rightleftharpoons \text{HCOHOHO}_2$                                                    | 1.08E1         | -2936            | see note*                           |
| EQ4201_a01 | TrAa01ScC       | $\text{CH}_3\text{C}(\text{O})\text{OOH} \rightleftharpoons \text{CH}_3\text{COOO}^- + \text{H}^+$    | 6.3E-9         |                  | Schuchmann and von Sonntag (1988)   |
| EQ4202_a01 | TrAa01ScC       | $\text{HOCH}_2\text{CO}_3\text{H} \rightleftharpoons \text{CH}_2\text{OHCO}_2\text{O}^- + \text{H}^+$ | 6.3E-9         |                  | Schuchmann and von Sonntag (1988)*  |
| EQ4203_a01 | TrAa01ScC       | $\text{HOCCOOH} \rightleftharpoons \text{H}^+ + \text{HOCCOO}^-$                                      | 5.6E-2         |                  | Martell (1977)                      |
| EQ4204_a01 | TrAa01ScC       | $\text{HOCCOO}^- \rightleftharpoons \text{H}^+ + \text{C}_2\text{O}_4^{2-}$                           | 5.4E-5         |                  | Martell (1977)                      |
| EQ4205_a01 | TrAa01ScC       | $\text{HOCH}_2\text{CO}_2\text{H} \rightleftharpoons \text{H}^+ + \text{CH}_2\text{OOHCO}_2^-$        | 1.754E-5       |                  | Fisher and Barnes (1972)*           |
| EQ4206_a01 | TrAa01ScC       | $\text{CH}_2\text{OOCOOH} \rightleftharpoons \text{H}^+ + \text{CH}_2\text{OOCO}_2^-$                 | 1.754E-5       |                  | Fisher and Barnes (1972)*           |
| EQ4207_a01 | TrAa01ScC       | $\text{CHOOHOOCOOH} \rightleftharpoons \text{H}^+ + \text{CHOOHOOCO}_2^-$                             | 1.754E-5       |                  | Fisher and Barnes (1972)*           |
| EQ4208_a01 | TrAa01ScC       | $\text{HOCH}_2\text{CO}_2\text{H} \rightleftharpoons \text{H}^+ + \text{CH}_2\text{OHCO}_2^-$         | 1.5E-4         |                  | Rumble (2020)                       |
| EQ4209_a01 | TrAa01ScC       | $\text{CHOHOOCOOH} \rightleftharpoons \text{H}^+ + \text{CHOHOOCO}_2^-$                               | 1.5E-4         |                  | Rumble (2020)*                      |
| EQ4210_a01 | TrAa01ScC       | $\text{CHOCOOH} \rightleftharpoons \text{H}^+ + \text{CHOCOO}^-$                                      | 1.754E-5       |                  | Fisher and Barnes (1972)            |
| EQ4211_a01 | TrAa01ScC       | $\text{COOHCO}_3 \rightleftharpoons \text{H}^+ + \text{CO}_2^- \text{CO}_3$                           | 1.754E-5       |                  | Fisher and Barnes (1972)            |
| EQ4250_a01 | TrAa01ScC       | $\text{CH}_3\text{CHO} \rightleftharpoons \text{CH}_3\text{CHOHOH}$                                   | 1.22           |                  | Tur'yan (2000)                      |
| EQ4251_a01 | TrAa01ScC       | $\text{CHOHOOCO} \rightleftharpoons \text{CHOHOOCOHOHOH}$                                             | 1.57E1         |                  | see note*                           |
| EQ4252_a01 | TrAa01ScC       | $\text{CH}_2\text{OHCHO} \rightleftharpoons \text{CH}_2\text{OHCHOHOH}$                               | 1.56E1         |                  | Doussin and Monod (2013)            |
| EQ4253_a01 | TrAa01ScC       | $\text{GLYOX} \rightleftharpoons \text{CHOCHOHOH}$                                                    | 3.5E2          |                  | Ervens and Volkamer (2010)          |
| EQ4254_a01 | TrAa01ScC       | $\text{CHOCHOHOH} \rightleftharpoons \text{CHOHOHCHOHOH}$                                             | 2.0E2          |                  | Ervens and Volkamer (2010)          |
| EQ4255_a01 | TrAa01ScC       | $\text{CHOCOOH} \rightleftharpoons \text{CHOOHOHCOOH}$                                                | 1.1E3          |                  | Doussin and Monod (2013)            |
| EQ4256_a01 | TrAa01ScC       | $\text{CHOCOO}^- \rightleftharpoons \text{CHOHOHCO}_2^-$                                              | 6.6E1          |                  | Doussin and Monod (2013)            |
| EQ4257_a01 | TrAa01ScC       | $\text{CO}_2^- \text{CO}_3 \rightleftharpoons \text{CO}_2^- \text{COHOHO}_2$                          | 6.6E1          |                  | see note*                           |
| EQ4258_a01 | TrAa01ScC       | $\text{CH}_2\text{OOHCHO} \rightleftharpoons \text{HOCH}_2\text{CHOHOH}$                              | 1.56E1         |                  | see note*                           |
| EQ4300_a01 | TrAa01ScScmC    | $\text{CH}_3\text{COCO} \rightleftharpoons \text{H}^+ + \text{CH}_3\text{COCO}_2^-$                   | 4.1E-3         |                  | Rumble (2020)                       |
| EQ4350_a01 | TrAa01ScC       | $\text{CH}_3\text{C}(\text{O})\text{CHO} \rightleftharpoons \text{CH}_3\text{COCHOHOH}$               | 1.98E3         |                  | Doussin and Monod (2013)            |

Table 5: Acid-base and other equilibria

| #           | labels           | reaction                                                                                                      | $K_0[M^{m-n}]$ | $-\Delta H/R[K]$ | reference                   |
|-------------|------------------|---------------------------------------------------------------------------------------------------------------|----------------|------------------|-----------------------------|
| EQ6000_a01  | TrAa01Cl         | $\text{Cl}_2^- \rightleftharpoons \text{Cl} + \text{Cl}^-$                                                    | 7.3E-6         |                  | Yu (2004)                   |
| EQ6200_a01  | TrAa01MblScScmCl | $\text{HCl} \rightleftharpoons \text{H}^+ + \text{Cl}^-$                                                      | 1.7E6          | 6896             | Marsh and McElroy (1985)    |
| EQ6201_a01  | TrAa01ScCl       | $\text{HOCl} \rightleftharpoons \text{H}^+ + \text{ClO}^-$                                                    | 3.2E-8         |                  | Lax (1969)                  |
| EQ7000_a01  | TrAa01Br         | $\text{Br}_2^- \rightleftharpoons \text{Br} + \text{Br}^-$                                                    | 2.54E-6        | -2256            | Liu et al. (2002)           |
| EQ7200_a01  | TrAa01MblScScmBr | $\text{HBr} \rightleftharpoons \text{H}^+ + \text{Br}^-$                                                      | 1.0E9          |                  | Lax (1969)                  |
| EQ7201_a01  | TrAa01ScBr       | $\text{HOBr} \rightleftharpoons \text{H}^+ + \text{BrO}^-$                                                    | 2.3E-9         | -3091            | Kelley and Tartar (1956)*   |
| EQ7600_a01  | TrAa01MblBrCl    | $\text{BrCl} + \text{Cl}^- \rightleftharpoons \text{BrCl}_2^-$                                                | 3.8            | 1191             | Wang et al. (1994)          |
| EQ7601_a01  | TrAa01MblBrCl    | $\text{BrCl} + \text{Br}^- \rightleftharpoons \text{Br}_2\text{Cl}^-$                                         | 1.8E4          | 7457             | Wang et al. (1994)          |
| EQ7602_a01  | TrAa01MblBrCl    | $\text{Br}_2 + \text{Cl}^- \rightleftharpoons \text{Br}_2\text{Cl}^-$                                         | 1.3            | 0                | Wang et al. (1994)          |
| EQ7603_a01  | TrAa01MblBrCl    | $\text{Br}^- + \text{Cl}_2 \rightleftharpoons \text{BrCl}_2^-$                                                | 4.2E6          | 14072            | Wang et al. (1994)          |
| EQ9200_a01  | TrAa01MblScScmS  | $\text{SO}_2 \rightleftharpoons \text{H}^+ + \text{HSO}_3^-$                                                  | 1.7E-2         | 2090             | Chameides (1984)            |
| EQ9201_a01  | TrAa01MblScScmS  | $\text{HSO}_3^- \rightleftharpoons \text{H}^+ + \text{SO}_3^{2-}$                                             | 6.0E-8         | 1120             | Chameides (1984)            |
| EQ9202_a01  | TrAa01MblScScmS  | $\text{HSO}_4^- \rightleftharpoons \text{H}^+ + \text{SO}_4^{2-}$                                             | 1.2E-2         | 2720             | Seinfeld and Pandis (1998)  |
| EQ9203_a01  | TrAa01MblScScmS  | $\text{H}_2\text{SO}_4 \rightleftharpoons \text{H}^+ + \text{HSO}_4^-$                                        | 1.0E3          |                  | Seinfeld and Pandis (1998)  |
| EQ11200_a01 | TrAa01Fe         | $\text{Fe}^{3+} \rightleftharpoons \text{FeOH}^{2+} + \text{H}^+$                                             | 2.34E-3        |                  | de Laat and Le (2006)*      |
| EQ11201_a01 | TrAa01Fe         | $\text{FeOH}^{2+} \rightleftharpoons \text{Fe}(\text{OH})_2^+ + \text{H}^+$                                   | 2E-4           |                  | de Laat and Le (2006)*      |
| EQ11202_a01 | TrAa01Fe         | $\text{Fe}^{3+} + \text{H}_2\text{O}_2 \rightleftharpoons \text{FeHO}_2^{2+} + \text{H}^+$                    | 3.1E-3         |                  | de Laat and Le (2006)       |
| EQ11203_a01 | TrAa01Fe         | $\text{FeOH}^{2+} + \text{H}_2\text{O}_2 \rightleftharpoons \text{Fe}(\text{OH})(\text{HO}_2)^+ + \text{H}^+$ | 2E-4           |                  | de Laat and Le (2006)       |
| EQ11600_a01 | TrAa01ClFe       | $\text{Fe}^{3+} + \text{Cl}^- \rightleftharpoons \text{FeCl}^{2+}$                                            | 6.61           |                  | de Laat and Le (2006)*      |
| EQ11601_a01 | TrAa01ClFe       | $\text{FeCl}^{2+} + \text{Cl}^- \rightleftharpoons \text{FeCl}_2^+$                                           | 1.6            |                  | de Laat and Le (2006)*      |
| EQ11800_a01 | TrAa01FeS        | $\text{Fe}^{3+} + \text{SO}_4^{2-} \rightleftharpoons \text{FeSO}_4^+$                                        | 120            |                  | Brand and van Eldik (1995)* |
| EQ11801_a01 | TrAa01FeS        | $\text{FeOH}^{2+} + \text{HSO}_3^- \rightleftharpoons \text{FeSO}_3^+$                                        | 8.25E2         |                  | Warneck (2018)*             |
| EQ11802_a01 | TrAa01FeS        | $\text{Fe}^{2+} + \text{SO}_3^- \rightleftharpoons \text{FeSO}_3^+$                                           | 1.6E7          |                  | Warneck (2018)              |

## Specific notes

EQ4100\_a01: For  $pK_a(\text{CO}_2)$ , see also Dickson and Millero (1987).  
EQ4150\_a01: Hydration from Winkelman et al. (2000) and dehydration from Winkelman et al. (2002). Bell and Evans (1966) found that acid catalysis is negligible.  
EQ4151\_a01: Assumed to be the same as for HCHO.  
EQ4202\_a01: Same as for  $\text{CH}_3\text{CO}_3\text{H}$ .  
EQ4205\_a01: Same as for  $\text{CH}_3\text{CO}_2\text{H}$ .  
EQ4206\_a01: Same as for  $\text{CH}_3\text{CO}_2\text{H}$ .

EQ4207\_a01: Same as for  $\text{CH}_3\text{CO}_2\text{H}$ .

EQ4209\_a01: Same as  $\text{HOCH}_2\text{CO}_2\text{H}$ .

EQ4251\_a01: Calculated as  $K_{\text{eq}} * k(\text{dehydration})$  where dehydration is assumed to be the same as for acetaldehyde.

EQ4257\_a01: Assumed to be equal to  $\text{CHOCO}_2\text{m}$ .

EQ4258\_a01: Same as for  $\text{HOCH}_2\text{CHO}$ .

EQ7201\_a01: For  $pK_a(\text{HOBr})$ , see also Keller-Rudek et al. (1992).

EQ11200\_a01: See also  $K$  values listed in Tab. 2.5 of Brand and van Eldik (1995).

EQ11201\_a01: Equilibrium calculated from  $K_1$  and  $K_2$  in Tab. 1 of de Laat and Le (2006).  $k$  for back reaction assumed. See also  $K$  values listed in Tab. 2.5 of Brand and van Eldik (1995).

EQ11600\_a01: See also  $K$  values listed in Tab. 2.5 of Brand and van Eldik (1995).

EQ11601\_a01: Equilibrium calculated from  $K_{29}$  and  $K_{30}$  in Tab. 2 of de Laat and Le (2006).  $k$  for forward reaction assumed. See also  $K$  values listed in Tab. 2.5 of Brand and van Eldik (1995).

EQ11800\_a01: Equilibrium at  $I = 1$  M.  $k$  for back reaction assumed.

EQ11801\_a01: Rate of equilibration assumed.

Table 6: Aqueous phase reactions

| #          | labels    | reaction                                                | $k_0 [M^{1-n}s^{-1}]$ | $-E_a/R[K]$ | reference                                          |
|------------|-----------|---------------------------------------------------------|-----------------------|-------------|----------------------------------------------------|
| A10000_a01 | TrAa01Sc  | $O_3 + O_2^- \rightarrow O_3^- + O_2$                   | 1.50E9                |             | Staehelin et al. (1984)                            |
| A21000_a01 | TrAa01Sc  | $OH + O_2^- \rightarrow OH^-$                           | 1.0E10                |             | Sehested et al. (1968)                             |
| A21001_a01 | TrAa01Sc  | $OH + OH \rightarrow H_2O_2$                            | 5.5E9                 |             | Buxton et al. (1988)                               |
| A21002_a01 | TrAa01Sc  | $HO_2 + O_2^- \rightarrow H_2O_2 + OH^-$                | 1.0E8                 | -900        | Christensen and Sehested (1988)                    |
| A21003_a01 | TrAa01Sc  | $HO_2 + OH \rightarrow H_2O$                            | 7.1E9                 |             | Sehested et al. (1968)                             |
| A21004_a01 | TrAa01Sc  | $HO_2 + HO_2 \rightarrow H_2O_2$                        | 9.7E5                 | -2500       | Christensen and Sehested (1988)                    |
| A21005_a01 | TrAa01Sc  | $H_2O_2 + OH \rightarrow HO_2$                          | 2.7E7                 | -1684       | Christensen et al. (1982)                          |
| A21006_a01 | TrAa01Sc  | $O_3 + OH \rightarrow HO_4$                             | 1.10E8                |             | Staehelin et al. (1984)                            |
| A21007_a01 | TrAa01Sc  | $O_3 + OH^- \rightarrow HO_2 + O_2^-$                   | 7.00E1                |             | Staehelin et al. (1984)                            |
| A21008_a01 | TrAa01Sc  | $HO_3 \rightarrow OH + O_2$                             | 1.10E5                |             | Staehelin et al. (1984)                            |
| A21009_a01 | TrAa01Sc  | $HO_4 \rightarrow HO_2 + O_2$                           | 2.80E4                |             | Staehelin et al. (1984)                            |
| A21010_a01 | TrAa01Sc  | $HO_4 + HO_4 \rightarrow H_2O_2 + 2 O_3$                | 5.00E9                |             | Staehelin et al. (1984)                            |
| A21011_a01 | TrAa01Sc  | $HO_4 + HO_3 \rightarrow H_2O_2 + O_3 + O_2$            | 5.00E9                |             | Staehelin et al. (1984)                            |
| A31000_a01 | TrAa01ScN | $NO_2^- + O_3 \rightarrow NO_3^-$                       | 5.0E5                 | -6950       | Damschen and Martin (1983)                         |
| A31001_a01 | TrAa01ScN | $NO_2 + NO_2 \rightarrow HNO_3 + HONO$                  | 1.0E8                 |             | Lee and Schwartz (1981)                            |
| A31002_a01 | TrAa01ScN | $NO_4^- \rightarrow NO_2^-$                             | 8.0E1                 |             | Warneck (1999)                                     |
| A310MS_a01 | TrAa01ScN | $N_2O_5 \rightarrow NO_2^+ + NO_3^-$                    | 1.5E5                 |             | Staudt et al. (2019)                               |
| A311MS_a01 | TrAa01ScN | $NO_2^+ + NO_3^- \rightarrow N_2O_5$                    | 2.7E8                 |             | Staudt et al. (2019), Bertram and Thornton (2009)* |
| A32000_a01 | TrAa01ScN | $NO_2 + HO_2 \rightarrow HNO_4$                         | 1.8E9                 |             | Warneck (1999)                                     |
| A32001_a01 | TrAa01ScN | $NO_2^- + OH \rightarrow NO_2 + OH^-$                   | 1.0E10                |             | Wingenter et al. (1999)                            |
| A32002_a01 | TrAa01ScN | $NO_3 + OH^- \rightarrow NO_3^- + OH$                   | 8.2E7                 | -2700       | Exner et al. (1992)                                |
| A32003_a01 | TrAa01ScN | $HONO + OH \rightarrow NO_2$                            | 1.0E10                |             | Barker et al. (1970)                               |
| A32004_a01 | TrAa01ScN | $HONO + H_2O_2 + H^+ \rightarrow HNO_3 + H^+$           | 4.6E3                 | -6800       | Damschen and Martin (1983)                         |
| A320MS_a01 | TrAa01ScN | $NO_2^+ + H_2O \rightarrow HNO_3 + H^+$                 | 1.6E7                 |             | Staudt et al. (2019)                               |
| A321MS_a01 | TrAa01ScN | $HNO_3 + H^+ \rightarrow NO_2^+ + H_2O$                 | 1.6E-9                |             | Sampoli et al. (1985)*                             |
| A41000_a01 | TrAa01Sc  | $CO_3^- + O_2^- \rightarrow HCO_3^- + OH^-$             | 6.5E8                 |             | Ross et al. (1992)                                 |
| A41001_a01 | TrAa01Sc  | $CO_3^- + H_2O_2 \rightarrow HCO_3^- + HO_2$            | 4.3E5                 |             | Ross et al. (1992)                                 |
| A41002_a01 | TrAa01Sc  | $HCOO^- + CO_3^- \rightarrow 2 HCO_3^- + HO_2$          | 1.5E5                 |             | Ross et al. (1992)                                 |
| A41003_a01 | TrAa01Sc  | $HCOO^- + OH \rightarrow O_2^- + H_2O + CO_2$           | 3.1E9                 | -1240       | Chin and Wine (1994)                               |
| A41004_a01 | TrAa01ScN | $HCOO^- + NO_3 \rightarrow NO_3^- + H^+ + O_2^- + CO_2$ | 5.119E+07             | -2200       | Exner et al. (1994)                                |
| A41005_a01 | TrAa01Sc  | $HCOO^- + O_3 \rightarrow OH + O_2^- + CO_2$            | 1.00E2                |             | Hoigné and Bader (1983)                            |
| A41006_a01 | TrAa01Sc  | $HCO_3^- + OH \rightarrow CO_3^-$                       | 8.5E6                 |             | Ross et al. (1992)                                 |
| A41007_a01 | TrAa01Sc  | $HCHO + OH \rightarrow HCOOH + HO_2$                    | 7.7E8                 | -1020       | Chin and Wine (1994)                               |

Table 6: Aqueous phase reactions (...continued)

| #            | labels    | reaction                                                    | $k_0 [M^{1-n} s^{-1}]$  | $-E_a/R[K]$ | reference                    |
|--------------|-----------|-------------------------------------------------------------|-------------------------|-------------|------------------------------|
| A41008_a01   | TrAa01Sc  | $HCOOH + OH \rightarrow HO_2 + CO_2$                        | 1.1E8                   | -991        | Chin and Wine (1994)         |
| A41009_a01   | TrAa01ScN | $HCOOH + NO_3 \rightarrow NO_3^- + H^+ + HO_2 + CO_2$       | 3.8E5                   | -3400       | Exner et al. (1994)          |
| A41010_a01   | TrAa01Sc  | $CH_3OO + HO_2 \rightarrow CH_3OOH$                         | 4.3E5                   |             | Jacob (1986)                 |
| A41011_a01   | TrAa01Sc  | $CH_3OO + O_2^- \rightarrow CH_3OOH + OH^-$                 | 5.0E7                   |             | Jacob (1986)                 |
| A41012a_a01  | TrAa01Sc  | $CH_3OO + CH_3OO \rightarrow 2 HCHO + H_2O_2$               | $0.20 \times 2.145E+08$ | -2139       | Herrmann et al. (1999b)      |
| A41012b_a01  | TrAa01Sc  | $CH_3OO + CH_3OO \rightarrow 2 HOCH_2O_2$                   | $0.80 \times 2.145E+08$ | -2139       | Herrmann et al. (1999b)      |
| A41013a_a01  | TrAa01Sc  | $CH_3OH + OH \rightarrow HOCH_2O_2 + H_2O$                  | $0.93 \times 9.70E8$    | -600        | Elliot and McCracken (1989)* |
| A41013b_a01  | TrAa01Sc  | $CH_3OH + OH \rightarrow HCHO + HO_2 + H_2O$                | $0.07 \times 9.70E8$    | -600        | Elliot and McCracken (1989)  |
| A41014_a01   | TrAa01ScN | $CH_3OH + NO_3 \rightarrow HOCH_2O_2 + NO_3^- + H^+$        | 5.40E5                  | -4300       | Herrmann and Zellner (1998)  |
| A41015_a01   | TrAa01Sc  | $CH_3OH + CO_3^- \rightarrow HOCH_2O_2 + HCO_3^-$           | 5.431E+03               | -3100       | Clifton and Huie (1993)      |
| A41016a_a01  | TrAa01Sc  | $CH_3OOH + OH \rightarrow CH_3OO + H_2O$                    | $0.25 \times 6.30E8$    |             | Monod et al. (2007)*         |
| A41016b_a01  | TrAa01Sc  | $CH_3OOH + OH \rightarrow HCHO + OH + H_2O$                 | $0.75 \times 6.30E8$    |             | Monod et al. (2007)*         |
| A41017a_a01  | TrAa01ScN | $CH_3OOH + NO_3 \rightarrow CH_3OO + NO_3^- + H^+$          | $0.25 \times 4.90E6$    | -2000       | see note*                    |
| A41017b_a01  | TrAa01ScN | $CH_3OOH + NO_3 \rightarrow HCHO + HO_2 + NO_3^- + H^+$     | $0.75 \times 4.90E6$    | -2000       | see note*                    |
| A41018a_a01  | TrAa01Sc  | $CH_3OOH + CO_3^- \rightarrow CH_3OO + HCO_3^-$             | $0.25 \times 4.30E5$    |             | see note*                    |
| A41018b_a01  | TrAa01Sc  | $CH_3OOH + CO_3^- \rightarrow HCHO + HO_2 + HCO_3^-$        | $0.75 \times 4.30E5$    |             | see note*                    |
| A41019a_a01  | TrAa01Sc  | $HOCH_2OOH + OH \rightarrow HOCH_2O_2 + H_2O$               | $0.25 \times 6.30E8$    |             | see note*                    |
| A41019b_a01  | TrAa01Sc  | $HOCH_2OOH + OH \rightarrow CHOOOH + HO_2 + H_2O$           | $0.75 \times 6.30E8$    |             | see note*                    |
| A41020a_a01  | TrAa01ScN | $HOCH_2OOH + NO_3 \rightarrow HOCH_2O_2 + NO_3^- + H^+$     | $0.25 \times 4.90E6$    | -2000       | see note*                    |
| A41020b_a01  | TrAa01ScN | $HOCH_2OOH + NO_3 \rightarrow CHOOOH + HO_2 + NO_3^- + H^+$ | $0.75 \times 4.90E6$    | -2000       | see note*                    |
| A41021_a01   | TrAa01Sc  | $HOCH_2O_2 \rightarrow HCHO + HO_2$                         | 1.00E1                  |             | see note*                    |
| A41022_a01   | TrAa01Sc  | $HOCH_2O_2 + HO_2 \rightarrow HOCH_2OOH + O_2$              | 9.7E5                   | -2500       | see note*                    |
| A41023_a01   | TrAa01Sc  | $HOCH_2O_2 + O_2^- \rightarrow HOCH_2OOH + O_2 + OH^-$      | 1.0E8                   | -900        | see note*                    |
| A41024_a01   | TrAa01Sc  | $HOCH_2O_2 + HOCH_2O_2 \rightarrow 2 HCOOH + H_2O_2$        | 7.367E+08               | -1395       | Huie and Clifton (1993)      |
| A41025_a01   | TrAa01Sc  | $HCOOH + H_2O_2 + H^+ \rightarrow CHOOOH + H_2O + H^+$      | 3.080E-04               | -5235       | De Filippis et al. (2009)    |
| A41026a_a01  | TrAa01Sc  | $CHOOOH + H^+ \rightarrow HCOOH + H_2O_2 + H^+$             | 3.790E-04               | -5235       | De Filippis et al. (2009)    |
| A41026b_a01  | TrAa01Sc  | $CHOOOH + H^+ \rightarrow CO_2 + H_2O + H^+$                | 1.219E-03               | -8735       | De Filippis et al. (2009)    |
| A41027_a01   | TrAa01Sc  | $HOCH_2OH + OH \rightarrow HCOHOHO_2 + H_2O$                | 7.70E8                  | -1000       | Chin and Wine (1994)         |
| A41028_a01   | TrAa01Sc  | $HOCH_2OH + CO_3^- \rightarrow HCO_3^- + HCOHOHO_2$         | 1.30E4                  |             | Zellner et al. (1996)        |
| A41029_a01   | TrAa01ScN | $HOCH_2OH + NO_3 \rightarrow NO_3^- + H^+ + HCOHOHO_2$      | 1.003E+06               | -4500       | Exner et al. (1993)          |
| A41030_a01   | TrAa01Sc  | $HCOHOHO_2 \rightarrow HCOOH + HO_2$                        | 1.00E6                  |             | see note*                    |
| A41030DT_a01 | TrAa01ScN | $HCOO^- + NO_2^+ \rightarrow HCOO^- + NO_3^- + 2 H^+$       | 7.50E+09                |             | Staudt et al. (2019)         |
| A41030MS_a01 | TrAa01ScN | $CH_3OH + NO_2^+ \rightarrow CH_3ONO_2 + H^+$               | 4.50E+08                |             | Iraci et al. (2007)          |



Table 6: Aqueous phase reactions (...continued)

| #           | labels     | reaction                                                                 | $k_0 [M^{1-n}s^{-1}]$   | $-E_a/R[K]$ | reference                         |
|-------------|------------|--------------------------------------------------------------------------|-------------------------|-------------|-----------------------------------|
| A42000a_a01 | TrAa01ScC  | $CH_3CH_2OH + OH \rightarrow CH_3CHO + HO_2 + H_2O$                      | $0.90 \times 2.002E+09$ | -830        | Monod et al. (2005)*              |
| A42000b_a01 | TrAa01ScC  | $CH_3CH_2OH + OH \rightarrow CH_2OHCH_2OO + H_2O$                        | $0.10 \times 2.002E+09$ | -830        | Monod et al. (2005)               |
| A42001a_a01 | TrAa01ScCN | $CH_3CH_2OH + NO_3 \rightarrow CH_3CHO + HO_2 + NO_3^- + H^+$            | $0.90 \times 2.184E+06$ | -3300       | Herrmann and Zellner (1998)*      |
| A42001b_a01 | TrAa01ScCN | $CH_3CH_2OH + NO_3 \rightarrow CH_2OHCH_2OO + NO_3^- + H^+$              | $0.10 \times 2.184E+06$ | -3300       | Herrmann and Zellner (1998)       |
| A42002a_a01 | TrAa01ScC  | $CH_2OHCH_2OO + CH_2OHCH_2OO \rightarrow CH_2OHCHO + CH_2OHCHO + H_2O_2$ | $0.50 \times 1.00E8$    |             | Piesiak et al. (1984)             |
| A42002b_a01 | TrAa01ScC  | $CH_2OHCH_2OO + CH_2OHCH_2OO \rightarrow CH_2OHCHO + ETHGLY$             | $0.33 \times 1.00E8$    |             | Piesiak et al. (1984)             |
| A42002c_a01 | TrAa01ScC  | $CH_2OHCH_2OO + CH_2OHCH_2OO \rightarrow 2 HOCH_2O_2 + 2 HCHO$           | $0.17 \times 1.00E8$    |             | Piesiak et al. (1984)             |
| A42003_a01  | TrAa01ScC  | $CH_2OHCH_2OO + O_2^- \rightarrow HYETHO_2H + OH^-$                      | 1.0E8                   | -900        | see note*                         |
| A42004_a01  | TrAa01ScC  | $CH_2OHCH_2OO + HO_2 \rightarrow HYETHO_2H$                              | 9.7E5                   | -2500       | see note*                         |
| A42005_a01  | TrAa01ScC  | $HYETHO_2H + OH \rightarrow CH_2OHCHO$                                   | 1.10E9                  |             | see note*                         |
| A42006_a01  | TrAa01ScC  | $ETHGLY + OH \rightarrow CH_2OHCHO + HO_2 + H_2O$                        | 1.657E+09               | -1191       | Hoffmann et al. (2009)*           |
| A42007_a01  | TrAa01ScCN | $ETHGLY + NO_3 \rightarrow CH_2OHCHO + HO_2 + NO_3^- + H^+$              | 5.856E+06               | -2117       | Hoffmann et al. (2009)*           |
| A42008_a01  | TrAa01ScC  | $CH_3CHO + OH \rightarrow CH_3COOO + H_2O$                               | 3.60E9                  |             | Schuchmann and von Sonntag (1988) |
| A42009_a01  | TrAa01ScCN | $CH_3CHO + NO_3 \rightarrow CH_3COOO + NO_3^- + H^+$                     | 3.10E6                  |             | Rousse and George (2004)          |
| A42010_a01  | TrAa01ScC  | $CH_3COOO + CH_3COOO \rightarrow CH_3OO + CH_3OO + CO_2 + CO_2$          | 1.891E+08               | 1563        | see note*                         |
| A42011_a01  | TrAa01ScC  | $CH_3COOO + O_2^- \rightarrow CH_3COOO^- + O_2$                          | 1.00E9                  |             | Schuchmann and von Sonntag (1988) |
| A42012_a01  | TrAa01ScC  | $CH_3CHOHOH + OH \rightarrow CH_3COHOHOH + H_2O$                         | 1.20E9                  |             | Schuchmann and von Sonntag (1988) |
| A42013_a01  | TrAa01ScCN | $CH_3CHOHOH + NO_3 \rightarrow CH_3COHOHOH + NO_3^- + H^+$               | 1.10E6                  |             | Rousse and George (2004)          |
| A42014_a01  | TrAa01ScC  | $CH_3COHOHOH \rightarrow CH_3COOH + HO_2$                                | 1.00E6                  |             | see note*                         |
| A42015a_a01 | TrAa01ScC  | $CH_2OHCHO + OH \rightarrow CH_2OHCO_3 + H_2O$                           | $0.77 \times 1.40E9$    |             | Doussin and Monod (2013)          |
| A42015b_a01 | TrAa01ScC  | $CH_2OHCHO + OH \rightarrow CHOHOOCOCHO + H_2O$                          | $0.23 \times 1.40E9$    |             | Doussin and Monod (2013)          |
| A42016a_a01 | TrAa01ScCN | $CH_2OHCHO + NO_3 \rightarrow CH_2OHCO_3 + NO_3^- + H^+$                 | $0.77 \times 3.10E6$    |             | see note*                         |
| A42016b_a01 | TrAa01ScCN | $CH_2OHCHO + NO_3 \rightarrow CHOHOOCOCHO + NO_3^- + H^+$                | $0.23 \times 3.10E6$    |             | see note*                         |

Table 6: Aqueous phase reactions (...continued)

| #            | labels     | reaction                                                                  | $k_0 [M^{1-n} s^{-1}]$  | $-E_a/R[K]$ | reference                |
|--------------|------------|---------------------------------------------------------------------------|-------------------------|-------------|--------------------------|
| A42017_a01   | TrAa01ScC  | $CH_2OHCO_3 + O_2^- \rightarrow CH_2OHCO_2O^-$                            | 1.00E9                  |             | see note*                |
| A42018_a01   | TrAa01ScC  | $CH_2OHCOHOHO_2 \rightarrow HOCH_2CO_2H + HO_2$                           | 1.00E6                  |             | see note*                |
| A42019_a01   | TrAa01ScC  | $CHOHOOCOHO \rightarrow GLYOX + HO_2$                                     | 1.90E2                  |             | see note*                |
| A42020_a01   | TrAa01ScC  | $CHOHOOCOHOHOH \rightarrow CHOCHOHOH + HO_2$                              | 1.90E2                  |             | see note*                |
| A42021a_a01  | TrAa01ScC  | $CH_2OHCHOHOH + OH \rightarrow CH_2OHCOHOHO_2 + H_2O$                     | $0.33 \times 1.10E9$    |             | Doussin and Monod (2013) |
| A42021b_a01  | TrAa01ScC  | $CH_2OHCHOHOH + OH \rightarrow CHOHOOCOHOHOH + H_2O$                      | $0.28 \times 1.10E9$    |             | Doussin and Monod (2013) |
| A42021c_a01  | TrAa01ScC  | $CH_2OHCHOHOH + OH \rightarrow HCOOH + HOCH_2O_2 + H_2O$                  | $0.39 \times 1.10E9$    |             | Doussin and Monod (2013) |
| A42022a_a01  | TrAa01ScCN | $CH_2OHCHOHOH + NO_3 \rightarrow CH_2OHCOHOHO_2 + NO_3^- + H^+$           | $0.33 \times 1.10E6$    |             | see note*                |
| A42022b_a01  | TrAa01ScCN | $CH_2OHCHOHOH + NO_3 \rightarrow CHOHOOCOHOHOH + NO_3^- + H^+$            | $0.28 \times 1.10E6$    |             | see note*                |
| A42022c_a01  | TrAa01ScCN | $CH_2OHCHOHOH + NO_3 \rightarrow HCOOH + HOCH_2O_2 + NO_3^- + H^+$        | $0.39 \times 1.10E6$    |             | see note*                |
| A42023a_a01  | TrAa01ScC  | $CHOHOHCHOHOH + OH \rightarrow CHOHOHCOHOHO_2 + H_2O$                     | $0.27 \times 1.114E+09$ | -1516       | Buxton et al. (1997)     |
| A42023b_a01  | TrAa01ScC  | $CHOHOHCHOHOH + OH \rightarrow HCOOH + HCOHOHO_2 + HO_2 + H_2O$           | $0.73 \times 1.114E+09$ | -1516       | Buxton et al. (1997)*    |
| A42024a_a01  | TrAa01ScCN | $CHOHOHCHOHOH + NO_3 \rightarrow CHOHOHCOHOHO_2 + NO_3^- + H^+$           | $0.27 \times 1.00E6$    |             | see note*                |
| A42024b_a01  | TrAa01ScCN | $CHOHOHCHOHOH + NO_3 \rightarrow HCOOH + HCOHOHO_2 + HO_2 + NO_3^- + H^+$ | $0.73 \times 1.00E6$    |             | see note*                |
| A42025_a01   | TrAa01ScC  | $CHOHOHCOHOHO_2 \rightarrow CHOOHOHCOOH + HO_2$                           | $0.77 \times 1.00E6$    |             | see note*                |
| A42026_a01   | TrAa01ScC  | $CH_3COOH + OH \rightarrow CH_2OOCOOH + H_2O$                             | 1.50E7                  | -1330       | Chin and Wine (1994)     |
| A42027_a01   | TrAa01ScCN | $CH_3COOH + NO_3 \rightarrow CH_2OOCOOH + NO_3^- + H^+$                   | 1.429E+04               | -3800       | Exner et al. (1994)      |
| A42028_a01   | TrAa01ScC  | $CH_3COO^- + OH \rightarrow CH_2OOCO_2^- + H_2O$                          | 1.00E8                  | -1800       | Fisher and Hamill (1973) |
| A42029_a01   | TrAa01ScCN | $CH_3COO^- + NO_3 \rightarrow CH_2OOCO_2^- + NO_3^- + H^+$                | 2.916E+06               | -3800       | Exner et al. (1994)      |
| A42030DT_a01 | TrAa01ScCN | $CH_3COO^- + NO_2^+ \rightarrow CH_3COO^- + NO_3^- + 2 H^+$               | 7.50E+09                |             | Staudt et al. (2019)     |
| A42030a_a01  | TrAa01ScC  | $C_2H_5OOH + OH \rightarrow C_2H_5OO + H_2O$                              | $0.80 \times 5.80E8$    |             | Monod et al. (2007)      |
| A42030b_a01  | TrAa01ScC  | $C_2H_5OOH + OH \rightarrow CH_3COOH + HO_2 + H_2O$                       | $0.20 \times 5.80E8$    |             | Monod et al. (2007)*     |
| A42031a_a01  | TrAa01ScC  | $C_2H_5OO + C_2H_5OO \rightarrow CH_3CHO + CH_3CHO + H_2O_2$              | $0.20 \times 1.891E+08$ | 1563        | Herrmann et al. (1999b)  |
| A42031b_a01  | TrAa01ScC  | $C_2H_5OO + C_2H_5OO \rightarrow 2 CH_3CHO + 2 HO_2$                      | $0.80 \times 1.891E+08$ | 1563        | Herrmann et al. (1999b)* |

Table 6: Aqueous phase reactions (...continued)

| #           | labels     | reaction                                                                    | $k_0 [M^{1-n} s^{-1}]$ | $-E_a/R[K]$ | reference                   |
|-------------|------------|-----------------------------------------------------------------------------|------------------------|-------------|-----------------------------|
| A42032_a01  | TrAa01ScC  | $C_2H_5OO + O_2^- \rightarrow C_2H_5OOH + OH^-$                             | 1.0E8                  | -900        | see note*                   |
| A42033_a01  | TrAa01ScC  | $C_2H_5OO + HO_2 \rightarrow C_2H_5OOH$                                     | 9.7E5                  | -2500       | see note*                   |
| A42034_a01  | TrAa01ScC  | $CH_2OOCOOH + HO_2 \rightarrow HOOCH_2CO_2H$                                | 9.7E5                  | -2500       | see note*                   |
| A42035_a01  | TrAa01ScC  | $CH_2OOCOOH + O_2^- + H^+ \rightarrow HOOCH_2CO_2H$                         | 1.0E8                  | -900        | see note*                   |
| A42036a_a01 | TrAa01ScC  | $CH_2OOCOOH + CH_2OOCOOH \rightarrow CHOCOOH + CHOCOOH + H_2O_2$            | $0.30 \times 7.50E7$   |             | Schuchmann et al. (1985)    |
| A42036b_a01 | TrAa01ScC  | $CH_2OOCOOH + CH_2OOCOOH \rightarrow 2 HCHO + 2 CO_2 + H_2O_2$              | $0.30 \times 7.50E7$   |             | Schuchmann et al. (1985)    |
| A42036c_a01 | TrAa01ScC  | $CH_2OOCOOH + CH_2OOCOOH \rightarrow CHOCOOH + HOCH_2CO_2H$                 | $0.30 \times 7.50E7$   |             | Schuchmann et al. (1985)    |
| A42036d_a01 | TrAa01ScC  | $CH_2OOCOOH + CH_2OOCOOH \rightarrow CHOHOOCCOOH + CHOHOOCCOOH$             | $0.10 \times 7.50E7$   |             | Schuchmann et al. (1985)    |
| A42037_a01  | TrAa01ScC  | $CH_2OOCO_2^- + HO_2 \rightarrow CH_2OOHCO_2^- + O_2$                       | 9.7E5                  | -2500       | see note*                   |
| A42038_a01  | TrAa01ScC  | $CH_2OOCO_2^- + O_2^- + H^+ \rightarrow CH_2OOHCO_2^-$                      | 1.0E8                  | -900        | see note*                   |
| A42039a_a01 | TrAa01ScC  | $CH_2OOCO_2^- + CH_2OOCO_2^- \rightarrow CHOCOO^- + CHOCOO^- + H_2O_2$      | $0.30 \times 7.50E7$   |             | Schuchmann et al. (1985)    |
| A42039b_a01 | TrAa01ScC  | $CH_2OOCO_2^- + CH_2OOCO_2^- \rightarrow 2 HCHO + 2 CO_2 + H_2O_2 + 2 OH^-$ | $0.30 \times 7.50E7$   |             | Schuchmann et al. (1985)    |
| A42039c_a01 | TrAa01ScC  | $CH_2OOCO_2^- + CH_2OOCO_2^- \rightarrow CHOCOO^- + CH_2OHCO_2^-$           | $0.30 \times 7.50E7$   |             | Schuchmann et al. (1985)    |
| A42039d_a01 | TrAa01ScC  | $CH_2OOCO_2^- + CH_2OOCO_2^- \rightarrow 2 CHOHOOCCOO_2^-$                  | $0.10 \times 7.50E7$   |             | Schuchmann et al. (1985)    |
| A42040_a01  | TrAa01ScC  | $CH_2OOCO_2^- + O_3 \rightarrow O_3^- + HOCH_2OOH + CO_2$                   | 2.00E9                 |             | Sehested et al. (1984)      |
| A42141_a01  | TrAa01ScC  | $HOCCOO^- + OH \rightarrow C_2O_4^- + H_2O$                                 | 2.086E+08              | -2800       | Ervens et al. (2003)        |
| A42142_a01  | TrAa01ScC  | $C_2O_4^{2-} + OH \rightarrow C_2O_4^- + OH^-$                              | 2.508E+08              | -4300       | Ervens et al. (2003)        |
| A42143_a01  | TrAa01ScC  | $C_2O_4^- + O_2 \rightarrow 2 CO_2 + O_2^-$                                 | 2.40E9                 |             | Hislop and Bolton (1999)    |
| A42144a_a01 | TrAa01ScC  | $HOOCH_2CO_2H + OH \rightarrow CH_2OOCOOH + H_2O$                           | $0.80 \times 5.80E8$   |             | see note*                   |
| A42144b_a01 | TrAa01ScC  | $HOOCH_2CO_2H + OH \rightarrow CHOOHOOCOOH + H_2O$                          | $0.20 \times 5.80E8$   |             | see note*                   |
| A42145a_a01 | TrAa01ScCN | $HOOCH_2CO_2H + NO_3 \rightarrow CH_2OOCOOH + NO_3^- + H^+$                 | $0.80 \times 1.70E6$   |             | Herrmann and Zellner (1998) |
| A42145b_a01 | TrAa01ScCN | $HOOCH_2CO_2H + NO_3 \rightarrow CHOOHOOCOOH + NO_3^- + H^+$                | $0.20 \times 1.70E6$   |             | Herrmann and Zellner (1998) |
| A42146a_a01 | TrAa01ScC  | $CH_2OOHCO_2^- + OH \rightarrow CH_2OOCO_2^- + H_2O$                        | $0.80 \times 5.80E8$   |             | see note*                   |
| A42146b_a01 | TrAa01ScC  | $CH_2OOHCO_2^- + OH \rightarrow CHOOHOOCO_2^- + H_2O$                       | $0.20 \times 5.80E8$   |             | see note*                   |

Table 6: Aqueous phase reactions (...continued)

| #           | labels     | reaction                                                             | $k_0 [M^{1-n}s^{-1}]$   | $-E_a/R[K]$ | reference                             |
|-------------|------------|----------------------------------------------------------------------|-------------------------|-------------|---------------------------------------|
| A42147a_a01 | TrAa01ScCN | $CH_2OOHCO_2^- + NO_3 \rightarrow CH_2OOCO_2^- + NO_3^- + H^+$       | $0.80 \times 7.10E6$    |             | Herrmann and Zellner (1998)           |
| A42147b_a01 | TrAa01ScCN | $CH_2OOHCO_2^- + NO_3 \rightarrow CHOOHOOCO_2^- + NO_3^- + H^+$      | $0.20 \times 7.10E6$    |             | Herrmann and Zellner (1998)           |
| A42148_a01  | TrAa01ScC  | $CHOOHOOCO_2^- \rightarrow HOCCCOOH + HO_2$                          | 1.90E2                  |             | see note*                             |
| A42149_a01  | TrAa01ScC  | $CHOOHOOCO_2^- \rightarrow HOCCCOO^- + HO_2$                         | 1.90E2                  |             | see note*                             |
| A42150a_a01 | TrAa01ScC  | $HOCH_2CO_2H + OH \rightarrow CHOHOOCO_2^- + H_2O$                   | $0.62 \times 6.00E8$    |             | see note*                             |
| A42150b_a01 | TrAa01ScC  | $HOCH_2CO_2H + OH \rightarrow HCHO + CO_2 + HO_2 + H_2O$             | $0.38 \times 6.00E8$    |             | see note*                             |
| A42151a_a01 | TrAa01ScCN | $HOCH_2CO_2H + NO_3 \rightarrow CHOHOOCO_2^- + NO_3^- + H^+$         | $0.62 \times 7.445E+05$ | -3969       | see note*                             |
| A42151b_a01 | TrAa01ScCN | $HOCH_2CO_2H + NO_3 \rightarrow HCHO + CO_2 + HO_2 + NO_3^- + H^+$   | $0.38 \times 7.445E+05$ | -3969       | see note*                             |
| A42152_a01  | TrAa01ScC  | $CHOHOOCO_2^- \rightarrow CHOCO_2^- + HO_2$                          | 1.90E2                  |             | von Sonntag (1987)                    |
| A42153a_a01 | TrAa01ScC  | $CH_2OHCO_2^- + OH \rightarrow CHOHOOCO_2^- + H_2O$                  | $0.60 \times 8.60E8$    |             | Buxton et al. (1988)                  |
| A42153b_a01 | TrAa01ScC  | $CH_2OHCO_2^- + OH \rightarrow HCHO + CO_2 + O_2^- + H_2O$           | $0.19 \times 8.60E8$    |             | Buxton et al. (1988)                  |
| A42153c_a01 | TrAa01ScC  | $CH_2OHCO_2^- + OH \rightarrow HOCH_2O_2 + CO_2 + OH^-$              | $0.21 \times 8.60E8$    |             | Buxton et al. (1988)                  |
| A42154a_a01 | TrAa01ScCN | $CH_2OHCO_2^- + NO_3 \rightarrow CHOHOOCO_2^- + NO_3^- + H^+$        | $0.76 \times 7.502E+06$ | -3007       | Gaillard de Sémainville et al. (2007) |
| A42154b_a01 | TrAa01ScCN | $CH_2OHCO_2^- + NO_3 \rightarrow HCHO + CO_2 + O_2^- + NO_3^- + H^+$ | $0.24 \times 7.502E+06$ | -3007       | Gaillard de Sémainville et al. (2007) |
| A42155_a01  | TrAa01ScC  | $CHOHOOCO_2^- \rightarrow CHOCO_2^- + HO_2$                          | 1.90E2                  |             | von Sonntag (1987)                    |
| A42156a_a01 | TrAa01ScC  | $CHOOHOHCOOH + OH \rightarrow COOHCOHOHO_2 + H_2O$                   | $0.15 \times 2.830E+08$ | -1000       | Ervens et al. (2003)                  |
| A42156b_a01 | TrAa01ScC  | $CHOOHOHCOOH + OH \rightarrow HCOOH + CO_2 + HO_2 + H_2O$            | $0.85 \times 2.830E+08$ | -1000       | Ervens et al. (2003)*                 |
| A42157a_a01 | TrAa01ScCN | $CHOOHOHCOOH + NO_3 \rightarrow COOHCOHOHO_2 + NO_3^- + H^+$         | $0.15 \times 1.00E6$    |             | see note*                             |
| A42157b_a01 | TrAa01ScCN | $CHOOHOHCOOH + NO_3 \rightarrow HCOOH + CO_2 + HO_2 + NO_3^- + H^+$  | $0.85 \times 1.00E6$    |             | see note*                             |
| A42158a_a01 | TrAa01ScC  | $CHOHOHCO_2^- + OH \rightarrow CO_2^-COHOHO_2 + H_2O$                | $0.26 \times 3.271E+09$ | -4300       | Ervens et al. (2003)                  |
| A42158b_a01 | TrAa01ScC  | $CHOHOHCO_2^- + OH \rightarrow HCOOH + CO_2 + O_2^- + H_2O$          | $0.74 \times 3.271E+09$ | -4300       | Ervens et al. (2003)                  |
| A42159a_a01 | TrAa01ScCN | $CHOHOHCO_2^- + NO_3 \rightarrow CO_2^-COHOHO_2 + NO_3^- + H^+$      | $0.26 \times 1.80E5$    |             | Herrmann and Zellner (1998)           |

Table 6: Aqueous phase reactions (...continued)

| #           | labels     | reaction                                                                                                                                    | $k_0 [M^{1-n}s^{-1}]$          | $-E_a/R[K]$ | reference                   |
|-------------|------------|---------------------------------------------------------------------------------------------------------------------------------------------|--------------------------------|-------------|-----------------------------|
| A42159b_a01 | TrAa01ScCN | $\text{CHOHOHCO}_2^- + \text{NO}_3 \rightarrow \text{HCOOH} + \text{CO}_2 + \text{O}_2^- + \text{NO}_3^- + \text{H}^+$                      | $0.74 \times 1.80\text{E}5$    |             | Herrmann and Zellner (1998) |
| A42160_a01  | TrAa01ScC  | $\text{CHOHOHCO}_2^- + \text{H}_2\text{O}_2 \rightarrow \text{HCOO}^- + \text{CO}_2 + \text{H}_2\text{O} + \text{H}_2\text{O}$              | 1.10E-1                        |             | Schöne and Herrmann (2014)  |
| A42161_a01  | TrAa01ScC  | $\text{COOHCOHOHO}_2 \rightarrow \text{HOCCOOH} + \text{HO}_2$                                                                              | 1.00E6                         |             | see note*                   |
| A42162_a01  | TrAa01ScC  | $\text{CO}_2^- \text{COHOHO}_2 \rightarrow \text{HOCCOO}^- + \text{HO}_2$                                                                   | 1.00E6                         |             | see note*                   |
| A42163a_a01 | TrAa01ScC  | $\text{CH}_2\text{OOHCHO} + \text{OH} \rightarrow \text{HCHO} + \text{CO} + \text{OH} + \text{H}_2\text{O}$                                 | $0.77 \times 1.40\text{E}9$    |             | see note*                   |
| A42163b_a01 | TrAa01ScC  | $\text{CH}_2\text{OOHCHO} + \text{OH} \rightarrow \text{GLYOX} + \text{HO}_2 + \text{H}_2\text{O}$                                          | $0.23 \times 1.40\text{E}9$    |             | see note*                   |
| A42164a_a01 | TrAa01ScCN | $\text{CH}_2\text{OOHCHO} + \text{NO}_3 \rightarrow \text{HCHO} + \text{CO} + \text{NO}_3 + \text{H}_2\text{O}$                             | $0.77 \times 3.10\text{E}6$    |             | see note*                   |
| A42164b_a01 | TrAa01ScCN | $\text{CH}_2\text{OOHCHO} + \text{NO}_3 \rightarrow \text{GLYOX} + \text{NO}_3^- + \text{H}_2\text{O} + \text{H}^+$                         | $0.23 \times 3.10\text{E}6$    |             | see note*                   |
| A42165a_a01 | TrAa01ScC  | $\text{HOOCH}_2\text{CHOHOH} + \text{OH} \rightarrow \text{HOOCH}_2\text{CO}_2\text{H} + \text{HO}_2 + \text{H}_2\text{O}$                  | $0.33 \times 1.10\text{E}9$    |             | see note*                   |
| A42165b_a01 | TrAa01ScC  | $\text{HOOCH}_2\text{CHOHOH} + \text{OH} \rightarrow \text{CHOCHOHOH} + \text{OH} + \text{H}_2\text{O}$                                     | $0.28 \times 1.10\text{E}9$    |             | see note*                   |
| A42165c_a01 | TrAa01ScC  | $\text{HOOCH}_2\text{CHOHOH} + \text{OH} \rightarrow \text{HCOOH} + \text{HCHO} + \text{OH} + \text{H}_2\text{O}$                           | $0.39 \times 1.10\text{E}9$    |             | see note*                   |
| A42166a_a01 | TrAa01ScCN | $\text{HOOCH}_2\text{CHOHOH} + \text{NO}_3 \rightarrow \text{HOOCH}_2\text{CO}_2\text{H} + \text{NO}_3^- + \text{H}_2\text{O} + \text{H}^+$ | $0.33 \times 1.10\text{E}6$    |             | see note*                   |
| A42166b_a01 | TrAa01ScCN | $\text{HOOCH}_2\text{CHOHOH} + \text{NO}_3 \rightarrow \text{CHOCHOHOH} + \text{NO}_3 + \text{H}_2\text{O}$                                 | $0.28 \times 1.10\text{E}6$    |             | see note*                   |
| A42166c_a01 | TrAa01ScCN | $\text{HOOCH}_2\text{CHOHOH} + \text{NO}_3 \rightarrow \text{HCOOH} + \text{HCHO} + \text{NO}_3 + \text{H}_2\text{O}$                       | $0.39 \times 1.10\text{E}6$    |             | see note*                   |
| A42167_a01  | TrAa01ScC  | $\text{HOCH}_2\text{OH} + \text{HOCH}_2\text{OH} \rightarrow \text{MG2} + \text{H}_2\text{O}$                                               | see note                       | see note    | Hahnenstein et al. (1995)*  |
| A42168_a01  | TrAa01ScC  | $\text{MG2} + \text{H}_2\text{O} \rightarrow \text{HOCH}_2\text{OH} + \text{HOCH}_2\text{OH}$                                               | see note                       | see note    | Hahnenstein et al. (1995)   |
| A42169_a01  | TrAa01ScC  | $\text{MG2} + \text{OH} \rightarrow \text{HMF} + \text{HO}_2$                                                                               | 1.54E9                         | -1020       | see note*                   |
| A42470_a01  | TrAa01ScC  | $\text{CH}_3\text{COOO} + \text{H}_2\text{O} \rightarrow \text{CH}_3\text{COOH} + \text{HO}_2$                                              | 7.0E5                          |             | Villalta et al. (1996)      |
| A42471_a01  | TrAa01ScC  | $\text{CH}_2\text{OHCO}_3 + \text{H}_2\text{O} \rightarrow \text{HOCH}_2\text{CO}_2\text{H} + \text{HO}_2$                                  | 7.0E5                          |             | see note*                   |
| A42472_a01  | TrAa01ScC  | $\text{CHOCO}_3 + \text{H}_2\text{O} \rightarrow \text{CHOCOOH} + \text{HO}_2$                                                              | 7.0E5                          |             | see note*                   |
| A42473_a01  | TrAa01ScC  | $\text{COOHCO}_3 + \text{H}_2\text{O} \rightarrow \text{HOCCOOH} + \text{HO}_2$                                                             | 7.0E5                          |             | see note*                   |
| A43000a_a01 | TrAa01ScC  | $\text{CH}_3\text{COCHOHOH} + \text{OH} \rightarrow \text{CH}_3\text{COCOOH} + \text{HO}_2$                                                 | $0.29 \times 9.215\text{E}+08$ | -1235       | Schaefer et al. (2015)*     |
| A43000b_a01 | TrAa01ScC  | $\text{CH}_3\text{COCHOHOH} + \text{OH} \rightarrow \text{HCOOH} + \text{CH}_3\text{COOO}$                                                  | $0.71 \times 9.215\text{E}+08$ | -1235       | Schaefer et al. (2015)      |
| A43001_a01  | TrAa01ScCN | $\text{CH}_3\text{COCHOHOH} + \text{NO}_3 \rightarrow \text{CH}_3\text{COCOOH} + \text{NO}_3^- + \text{H}^+$                                | 4.539E+06                      | -4213       | Schaefer et al. (2015)*     |

Table 6: Aqueous phase reactions (...continued)

| #           | labels     | reaction                                                               | $k_0 [M^{1-n} s^{-1}]$ | $-E_a/R[K]$ | reference                             |
|-------------|------------|------------------------------------------------------------------------|------------------------|-------------|---------------------------------------|
| A43002_a01  | TrAa01ScC  | $CH_3COCOOH + OH \rightarrow CH_3COOH + HO_2 + CO_2$                   | 2.592E+08              | -1804       | Schaefer et al. (2012)*               |
| A43003_a01  | TrAa01ScCN | $CH_3COCOOH + NO_3 \rightarrow CH_3COOH + NO_3^- + CO_2 + H^+$         | 2.828E+06              | -1804       | Gaillard de Sémainville et al. (2007) |
| A43004_a01  | TrAa01ScC  | $CH_3COCO_2^- + OH \rightarrow CH_3COO^- + HO_2 + CO_2$                | 6.252E+08              | -3007       | Schaefer et al. (2012)*               |
| A43005_a01  | TrAa01ScCN | $CH_3COCO_2^- + NO_3 \rightarrow CH_3COO^- + NO_3^- + CO_2 + H^+$      | 2.306E+07              | -2887       | Gaillard de Sémainville et al. (2007) |
| A43006_a01  | TrAa01ScC  | $CH_3COCH_3 + OH \rightarrow CH_3COCH_2O_2$                            | 1.80E8                 |             | Gligorovski et al. (2009)             |
| A43007_a01  | TrAa01ScCN | $CH_3COCH_3 + NO_3 \rightarrow CH_3COCH_2O_2 + NO_3^- + H^+$           | 3.721E+03              | -4332       | Herrmann and Zellner (1998)           |
| A43008a_a01 | TrAa01ScC  | $CH_3COCH_2O_2 + CH_3COCH_2O_2 \rightarrow CH_3COCH_2OH + CH_3C(O)CHO$ | $0.20 \times 4.00E8$   |             | Zegota et al. (1986)                  |
| A43008b_a01 | TrAa01ScC  | $CH_3COCH_2O_2 + CH_3COCH_2O_2 \rightarrow 2.0 CH_3C(O)CHO + H_2O_2$   | $0.45 \times 4.00E8$   |             | Zegota et al. (1986)                  |
| A43009c_a01 | TrAa01ScC  | $CH_3COCH_2O_2 + CH_3COCH_2O_2 \rightarrow 2.0 HCHO + 2.0 CH_3COOO$    | $0.15 \times 4.00E8$   |             | Zegota et al. (1986)                  |
| A43009d_a01 | TrAa01ScC  | $CH_3COCH_2O_2 + CH_3COCH_2O_2 \rightarrow 2.0 CH_3C(O)CHO + 2.0 HO_2$ | $0.20 \times 4.00E8$   |             | Zegota et al. (1986)                  |
| A43010a_a01 | TrAa01ScC  | $CH_3COCH_2OH + OH \rightarrow CH_3COCHOHO_2$                          | $0.85 \times 5.10E8$   |             | Doussin and Monod (2013)*             |
| A43010b_a01 | TrAa01ScC  | $CH_3COCH_2OH + OH \rightarrow HCHO + CH_3COOO$                        | $0.15 \times 5.10E8$   |             | Doussin and Monod (2013)              |
| A43011_a01  | TrAa01ScCN | $CH_3COCH_2OH + NO_3 \rightarrow CH_3COCHOHO_2 + NO_3^- + H^+$         | 2.108E+07              | -1564       | Gaillard de Sémainville et al. (2007) |
| A43012_a01  | TrAa01ScC  | $CH_3COCHOHO_2 \rightarrow CH_3C(O)CHO + HO_2$                         | 1.90E2                 |             | von Sonntag (1987)                    |
| A43013_a01  | TrAa01ScC  | $IPROPOL + OH \rightarrow CH_3COCH_3 + HO_2$                           | 1.90E9                 |             | see note*                             |
| A43014_a01  | TrAa01ScCN | $IPROPOL + NO_3 \rightarrow CH_3COCH_3 + NO_3^- + H^+ + HO_2$          | 3.70E6                 |             | see note*                             |
| A43015a_a01 | TrAa01ScC  | $CH_3COCH_2O_2H + OH \rightarrow CH_3C(O)CHO + OH$                     | 1.80E8                 |             | see note*                             |
| A43015b_a01 | TrAa01ScC  | $CH_3COCH_2O_2H + OH \rightarrow CH_3COCH_2O_2$                        | 4.70E8                 |             | see note*                             |
| A43016_a01  | TrAa01ScCN | $CH_3COCH_2O_2H + NO_3 \rightarrow CH_3COCH_2O_2 + NO_3^- + H^+$       | 4.50E6                 |             | see note*                             |
| A43017_a01  | TrAa01ScC  | $CH_3COCH_2O_2 + HO_2 \rightarrow CH_3COCH_2O_2H$                      | 4.30E5                 |             | see note*                             |
| A43018_a01  | TrAa01ScC  | $CH_3COCH_2O_2 + O_2^- \rightarrow CH_3COCH_2O_2H + O_2 + OH^-$        | 5.00E7                 |             | see note*                             |
| A43019a_a01 | TrAa01ScC  | $iC_3H_7OOH + OH \rightarrow CH_3COCH_3 + OH$                          | 9.90E8                 |             | see note*                             |
| A43019b_a01 | TrAa01ScC  | $iC_3H_7OOH + OH \rightarrow iC_3H_7O_2$                               | 1.80E8                 |             | see note*                             |
| A43020_a01  | TrAa01ScCN | $iC_3H_7OOH + NO_3 \rightarrow iC_3H_7O_2 + NO_3^- + H^+$              | 4.50E6                 |             | see note*                             |
| A43021_a01  | TrAa01ScC  | $iC_3H_7O_2 + HO_2 \rightarrow iC_3H_7OOH$                             | 4.30E5                 |             | see note*                             |

Table 6: Aqueous phase reactions (...continued)

| #          | labels    | reaction                                                                                                                                                                                   | $k_0 [M^{1-n}s^{-1}]$ | $-E_a/R[K]$ | reference                   |
|------------|-----------|--------------------------------------------------------------------------------------------------------------------------------------------------------------------------------------------|-----------------------|-------------|-----------------------------|
| A43022_a01 | TrAa01ScC | $iC_3H_7O_2 + O_2^- \rightarrow iC_3H_7OOH + O_2 + OH^-$                                                                                                                                   | 5.00E7                |             | see note*                   |
| A43023_a01 | TrAa01ScC | $HOCH_2OH + MG2 \rightarrow MG3 + H_2O$                                                                                                                                                    | see note              | see note    | Hahnenstein et al. (1995)*  |
| A43024_a01 | TrAa01ScC | $MG3 + H_2O \rightarrow HOCH_2OH + MG2$                                                                                                                                                    | see note              | see note    | Hahnenstein et al. (1995)   |
| A43025_a01 | TrAa01ScC | $MG3 + OH \rightarrow HM2F + HO_2$                                                                                                                                                         | 1.54E9                | -1020       | see note*                   |
| A44000_a01 | TrAa01ScC | $MACR + OH \rightarrow CH_2OHCO_2CH_3CHO$                                                                                                                                                  | 9.905E+09             | -1203       | Schöne and Herrmann (2014)  |
| A44001_a01 | TrAa01ScC | $CH_2OHCO_2CH_3CHO + CH_2OHCO_2CH_3CHO \rightarrow$<br>$CH_3C(O)CHO + CH_3COCH_2OH + HOCH_2O_2 +$<br>$HCOHOHO_2$                                                                           | 4.00E8                |             | Schöne and Herrmann (2014)  |
| A44002_a01 | TrAa01ScC | $MVK + OH \rightarrow CH_3COCHO_2CH_2OH$                                                                                                                                                   | 7.117E+09             | -1443       | Schöne and Herrmann (2014)  |
| A44003_a01 | TrAa01ScC | $CH_3COCHO_2CH_2OH + CH_3COCHO_2CH_2OH \rightarrow$<br>$1.1 CH_2COCOCH_2OH + .2 CH_2OHCHOOHCOCH_3$<br>$+ .35 CH_2OHCHO + .35 CH_3C(O)CHO + .35$<br>$HOCH_2O_2 + .35 CH_3COOO + .45 H_2O_2$ | 4.00E8                |             | Schöne and Herrmann (2014)  |
| A44004_a01 | TrAa01ScC | $GLYOX + CHOCHOHOH \rightarrow GOLIG1 + H_2O$                                                                                                                                              | 1.00E2                |             | Ervens and Volkamer (2010)  |
| A44005_a01 | TrAa01ScC | $GOLIG1 + H_2O \rightarrow GLYOX + CHOCHOHOH$                                                                                                                                              | 1.00E-1               |             | Ervens and Volkamer (2010)  |
| A44006_a01 | TrAa01ScC | $CHOCHOHOH + CHOCHOHOH \rightarrow GOLIG2 +$<br>$H_2O$                                                                                                                                     | 1.00E2                |             | Ervens and Volkamer (2010)  |
| A44007_a01 | TrAa01ScC | $GOLIG2 + H_2O \rightarrow CHOCHOHOH +$<br>$CHOCHOHOH$                                                                                                                                     | 1.00E-1               |             | Ervens and Volkamer (2010)  |
| A44008_a01 | TrAa01ScC | $CHOHOHCHOHOH + CHOCHOHOH \rightarrow GOLIG3$<br>$+ H_2O$                                                                                                                                  | 1.00E2                |             | Ervens and Volkamer (2010)  |
| A44009_a01 | TrAa01ScC | $GOLIG3 + H_2O \rightarrow CHOHOHCHOHOH +$<br>$CHOCHOHOH$                                                                                                                                  | 1.00E-1               |             | Ervens and Volkamer (2010)  |
| A44010_a01 | TrAa01ScC | $GOLIG1 + OH \rightarrow GOLIGO1 + HO_2$                                                                                                                                                   | 1.610E+09             | -1516       | see note*                   |
| A44011_a01 | TrAa01ScC | $GOLIG2 + OH \rightarrow GOLIGO2 + HO_2$                                                                                                                                                   | 1.610E+09             | -1516       | see note*                   |
| A44012_a01 | TrAa01ScC | $GOLIG3 + OH \rightarrow GOLIGO3 + HO_2$                                                                                                                                                   | 1.610E+09             | -1516       | see note*                   |
| A46000_a01 | TrAa01ScC | $CH_3C(O)CHO + CH_3COCHOHOH \rightarrow$<br>$CH_3COCHOHOCHOHCOCH_3 + H_2O$                                                                                                                 | 1.00E2                |             | Ervens and Volkamer (2010)* |
| A46001_a01 | TrAa01ScC | $CH_3COCHOHOCHOHCOCH_3 + H_2O \rightarrow$<br>$CH_3COCHOHOH + CH_3C(O)CHO$                                                                                                                 | 1.00E-1               |             | Ervens and Volkamer (2010)* |
| A46002_a01 | TrAa01ScC | $CH_3COCHOHOCHOHCOCH_3 + OH \rightarrow$<br>$CH_3COCOHOCHOHCOCH_3 + HO_2$                                                                                                                  | 1.303E+09             | -1235       | see note*                   |
| A46003_a01 | TrAa01ScC | $CH_3COCHOHOH + CH_3COCHOHOH \rightarrow$<br>$CH_3COCHOHOCOHC_3CHOHOH + H_2O$                                                                                                              | 1.00E2                |             | Ervens and Volkamer (2010)* |

Table 6: Aqueous phase reactions (...continued)

| #          | labels        | reaction                                                                  | $k_0 [M^{1-n} s^{-1}]$ | $-E_a/R[K]$ | reference                                |
|------------|---------------|---------------------------------------------------------------------------|------------------------|-------------|------------------------------------------|
| A46004_a01 | TrAa01ScC     | $CH_3COCHOHOCOHC_3CHOHOH + H_2O \rightarrow 2 CH_3COCHOHOH$               | 1.00E-1                |             | Ervens and Volkamer (2010)*              |
| A46005_a01 | TrAa01ScC     | $CH_3COCHOHOCOHC_3CHOHOH + OH \rightarrow CH_3COCOHOHOCOHC_3COHOH + HO_2$ | 1.303E+09              | -1235       | see note*                                |
| A460MS_a01 | TrAa01CN      | $PHENOL + NO_2^+ \rightarrow HOC_6H_4NO_2 + H^+$                          | 7.5E9                  |             | Ryder et al. (2015), Heal et al. (2007)* |
| A60000_a01 | TrAa01Cl      | $Cl + Cl \rightarrow Cl_2$                                                | 8.8E7                  |             | Wu et al. (1980)                         |
| A60001_a01 | TrAa01Cl      | $Cl_2^- + Cl_2^- \rightarrow Cl_2 + 2 Cl^-$                               | 3.5E9                  |             | Yu (2004)                                |
| A61000_a01 | TrAa01Cl      | $Cl^- + O_3 \rightarrow ClO^-$                                            | 3.0E-3                 |             | Hoigné et al. (1985)                     |
| A61001_a01 | TrAa01Cl      | $Cl_2 + O_2^- \rightarrow Cl_2^-$                                         | 1.0E9                  |             | Bjergbakke et al. (1981)                 |
| A61002_a01 | TrAa01Cl      | $Cl_2^- + O_2^- \rightarrow 2 Cl^-$                                       | 1.0E9                  |             | Jacobi (1996)*                           |
| A62000_a01 | TrAa01Cl      | $Cl \rightarrow H^+ + ClOH^-$                                             | 1.8E5                  |             | Yu (2004)                                |
| A62001_a01 | TrAa01Cl      | $Cl + H_2O_2 \rightarrow HO_2 + Cl^- + H^+$                               | 2.7E7                  | -1684       | Christensen et al. (1982)                |
| A62002_a01 | TrAa01Cl      | $Cl^- + OH \rightarrow ClOH^-$                                            | 4.2E9                  |             | Yu (2004)                                |
| A62003_a01 | TrAa01Cl      | $Cl_2 + HO_2 \rightarrow Cl_2^- + H^+$                                    | 1.0E9                  |             | Bjergbakke et al. (1981)                 |
| A62004_a01 | TrAa01MbICl   | $Cl_2 \rightarrow Cl^- + HOCl + H^+$                                      | 21.8                   | -8012       | Wang and Margerum (1994)                 |
| A62005_a01 | TrAa01Cl      | $Cl_2^- + HO_2 \rightarrow 2 Cl^- + H^+$                                  | 1.3E10                 |             | Jacobi (1996)                            |
| A62006_a01 | TrAa01Cl      | $HOCl + O_2^- \rightarrow Cl + OH^-$                                      | 7.5E6                  |             | Long and Bielski (1980)                  |
| A62007_a01 | TrAa01Cl      | $HOCl + HO_2 \rightarrow Cl$                                              | 7.5E6                  |             | Long and Bielski (1980)                  |
| A62008_a01 | TrAa01MbICl   | $HOCl + Cl^- + H^+ \rightarrow Cl_2$                                      | 2.2E4                  | -3508       | Wang and Margerum (1994)                 |
| A62009_a01 | TrAa01Cl      | $ClOH^- \rightarrow Cl^- + OH$                                            | 6.0E9                  |             | Yu (2004)                                |
| A62010_a01 | TrAa01Cl      | $ClOH^- + H^+ \rightarrow Cl$                                             | 2.4E10                 |             | Yu (2004)                                |
| A620MS_a01 | TrAa01Cl      | $ClOH^- + ClOH^- \rightarrow Cl_2 + 2 OH^-$                               | 1.8E9                  |             | Knipping et al. (2000)                   |
| A621MS_a01 | TrAa01Cl      | $ClOH^- + Cl^- \rightarrow Cl_2^- + OH^-$                                 | 1.0E4                  |             | Grigorev et al. (1987)                   |
| A622MS_a01 | TrAa01Cl      | $OH^- + Cl_2^- \rightarrow ClOH^- + Cl^-$                                 | 4.5E7                  |             | Grigorev et al. (1987)                   |
| A63000_a01 | TrAa01ClIN    | $Cl + NO_3^- \rightarrow NO_3 + Cl^-$                                     | 1.0E8                  |             | Buxton et al. (1999b)                    |
| A63001_a01 | TrAa01ClIN    | $Cl^- + NO_3 \rightarrow NO_3^- + Cl$                                     | 3.4E8                  |             | Buxton et al. (1999b)*                   |
| A63002_a01 | TrAa01ClIN    | $Cl_2^- + NO_2^- \rightarrow 2 Cl^- + NO_2$                               | 6.0E7                  |             | Jacobi et al. (1996)                     |
| A630MS_a01 | TrAa01MbIClIN | $ClNO_2 \rightarrow Cl^- + NO_2^+$                                        | 2.70E2                 |             | Behnke et al. (1997)                     |
| A631MS_a01 | TrAa01MbIClIN | $Cl^- + NO_2^+ \rightarrow ClNO_2$                                        | 7.5E9                  |             | Staudt et al. (2019)                     |
| A632MS_a01 | TrAa01MbIClIN | $ClNO_2 + Cl^- \rightarrow Cl_2 + NO_2^-$                                 | 1.0E7                  |             | Roberts et al. (2008)                    |
| A64000_a01 | TrAa01ScCl    | $Cl_2^- + CH_3OOH \rightarrow 2 Cl^- + H^+ + CH_3OO$                      | 6.20E5                 |             | see note*                                |
| A70000_a01 | TrAa01Br      | $Br_2^- + Br_2^- \rightarrow 2 Br^- + Br_2$                               | 1.9E9                  |             | Ross et al. (1992)                       |
| A71000_a01 | TrAa01Br      | $Br^- + O_3 \rightarrow BrO^-$                                            | 2.1E2                  | -4450       | Haag and Hoigné (1983)                   |



Table 6: Aqueous phase reactions (...continued)

| #           | labels          | reaction                                                                                          | $k_0 [M^{1-n} s^{-1}]$ | $-E_a/R[K]$ | reference                                         |
|-------------|-----------------|---------------------------------------------------------------------------------------------------|------------------------|-------------|---------------------------------------------------|
| A71001_a01  | TrAa01Br        | $Br_2 + O_2^- \rightarrow Br_2^-$                                                                 | 5.6E9                  |             | Sutton and Downes (1972)                          |
| A71002_a01  | TrAa01Br        | $Br_2^- + O_2^- \rightarrow 2 Br^-$                                                               | 1.7E8                  |             | Wagner and Strehlow (1987)                        |
| A72000_a01  | TrAa01Br        | $Br^- + OH \rightarrow BrOH^-$                                                                    | 1.1E10                 |             | Zehavi and Rabani (1972)                          |
| A72001_a01  | TrAa01Br        | $Br_2 + HO_2 \rightarrow Br_2^- + H^+$                                                            | 1.1E8                  |             | Sutton and Downes (1972)                          |
| A72002_a01  | TrAa01MblBr     | $Br_2 \rightarrow Br^- + HOBr + H^+$                                                              | 9.7E1                  | -7457       | Beckwith et al. (1996)                            |
| A72003_a01  | TrAa01Br        | $Br_2^- + HO_2 \rightarrow Br_2 + H_2O_2 + OH^-$                                                  | 4.4E9                  |             | Matthew et al. (2003)                             |
| A72004_a01  | TrAa01Br        | $Br_2^- + H_2O_2 \rightarrow 2 Br^- + H^+ + HO_2$                                                 | 1.0E5                  |             | Jacobi (1996)                                     |
| A72005_a01  | TrAa01Br        | $HOBr + O_2^- \rightarrow Br + OH^-$                                                              | 3.5E9                  |             | Schwarz and Bielski (1986)                        |
| A72006_a01  | TrAa01Br        | $HOBr + HO_2 \rightarrow Br$                                                                      | 1.0E9                  |             | Herrmann et al. (1999a)                           |
| A72007_a01  | TrAa01Br        | $HOBr + H_2O_2 \rightarrow Br^- + H^+$                                                            | 1.2E6                  |             | Bichsel and von Gunten (1999)                     |
| A72008_a01  | TrAa01MblBr     | $HOBr + Br^- + H^+ \rightarrow Br_2$                                                              | 1.6E10                 |             | Beckwith et al. (1996)                            |
| A72009a_a01 | TrAa01Br        | $BrOH^- \rightarrow Br^- + OH$                                                                    | 3.3E7                  |             | Zehavi and Rabani (1972)                          |
| A72009b_a01 | TrAa01Br        | $BrOH^- \rightarrow Br + OH^-$                                                                    | 4.2E6                  |             | Zehavi and Rabani (1972)                          |
| A72010_a01  | TrAa01Br        | $BrOH^- + H^+ \rightarrow Br$                                                                     | 4.4E10                 |             | Zehavi and Rabani (1972)                          |
| A73000_a01  | TrAa01BrN       | $Br^- + NO_3 \rightarrow Br + NO_3^-$                                                             | 4.0E9                  |             | Neta and Huie (1986)                              |
| A73001_a01  | TrAa01BrN       | $Br_2^- + NO_2^- \rightarrow 2 Br^- + NO_2$                                                       | 1.7E7                  | -1720       | Shoute et al. (1991)                              |
| A74000_a01  | TrAa01Br        | $Br_2^- + CH_3OOH \rightarrow 2 Br^- + H^+ + CH_3OO$                                              | 1.0E5                  |             | Jacobi (1996)*                                    |
| A76001_a01  | TrAa01BrCl      | $Br^- + ClO^- + H^+ \rightarrow BrCl + OH^-$                                                      | 3.7E10                 |             | Kumar and Margerum (1987)                         |
| A76002_a01  | TrAa01MblBrCl   | $Br^- + HOCl + H^+ \rightarrow BrCl$                                                              | 1.32E6                 |             | Kumar and Margerum (1987)                         |
| A76003_a01  | TrAa01MblBrCl   | $HOBr + Cl^- + H^+ \rightarrow BrCl$                                                              | 2.3E10                 |             | Liu and Margerum (2001)*                          |
| A76004_a01  | TrAa01MblBrCl   | $BrCl \rightarrow Cl^- + HOBr + H^+$                                                              | 3.0E6                  |             | Liu and Margerum (2001)                           |
| A91000_a01  | TrAa01ScS       | $SO_3^- + O_2 \rightarrow SO_5^-$                                                                 | 1.5E9                  |             | Huie and Neta (1987)                              |
| A91001_a01  | TrAa01MblScScmS | $SO_3^{2-} + O_3 \rightarrow SO_4^{2-}$                                                           | 1.5E9                  | -5300       | Hoffmann (1986)                                   |
| A91002_a01  | TrAa01ScS       | $SO_4^- + O_2^- \rightarrow SO_4^{2-}$                                                            | 3.5E9                  |             | Jiang et al. (1992)                               |
| A91003_a01  | TrAa01ScS       | $SO_4^- + SO_3^{2-} \rightarrow SO_3^- + SO_4^{2-}$                                               | 4.6E8                  |             | Huie and Neta (1987)                              |
| A91004_a01  | TrAa01ScS       | $SO_5^- + O_2^- \rightarrow HSO_5^- + OH^-$                                                       | 2.3E8                  |             | Buxton et al. (1996)                              |
| A91005_a01  | TrAa01S         | $SO_5^- + SO_3^{2-} \rightarrow .72 SO_4^- + .72 SO_4^{2-} + .28 SO_3^- + .28 HSO_5^- + .28 OH^-$ | 1.3E7                  |             | Huie and Neta (1987), Deister and Warneck (1990)* |
| A91006_a01  | TrAa01S         | $SO_5^- + SO_5^- \rightarrow O_2 + SO_4^{2-} + LSULFUR$                                           | 1.0E8                  |             | Ross et al. (1992)*                               |
| A92000_a01  | TrAa01ScS       | $SO_3^{2-} + OH \rightarrow SO_3^- + OH^-$                                                        | 5.5E9                  |             | Buxton et al. (1988)                              |
| A92001_a01  | TrAa01ScS       | $SO_4^- + OH \rightarrow HSO_5^-$                                                                 | 1.0E9                  |             | Jiang et al. (1992)                               |
| A92002_a01  | TrAa01ScS       | $SO_4^- + HO_2 \rightarrow SO_4^{2-} + H^+$                                                       | 3.5E9                  |             | Jiang et al. (1992)                               |
| A92003_a01  | TrAa01ScS       | $SO_4^- + H_2O \rightarrow SO_4^{2-} + H^+ + OH$                                                  | 1.1E1                  | -1110       | Herrmann et al. (1995)                            |
| A92004_a01  | TrAa01ScS       | $SO_4^- + H_2O_2 \rightarrow SO_4^{2-} + H^+ + HO_2$                                              | 1.2E7                  |             | Wine et al. (1989)                                |

Table 6: Aqueous phase reactions (...continued)

| #           | labels          | reaction                                                                                                                                        | $k_0$ [ $M^{1-n}s^{-1}$ ]      | $-E_a/R[K]$ | reference                     |
|-------------|-----------------|-------------------------------------------------------------------------------------------------------------------------------------------------|--------------------------------|-------------|-------------------------------|
| A92005_a01  | TrAa01ScS       | $\text{HSO}_3^- + \text{O}_2^- \rightarrow \text{SO}_4^{2-} + \text{OH}^-$                                                                      | 3.0E3                          |             | see note*                     |
| A92006_a01  | TrAa01MblScScmS | $\text{HSO}_3^- + \text{O}_3 \rightarrow \text{SO}_4^{2-} + \text{H}^+$                                                                         | 3.7E5                          | -5500       | Hoffmann (1986)               |
| A92007_a01  | TrAa01ScS       | $\text{HSO}_3^- + \text{OH}^- \rightarrow \text{SO}_3^{2-}$                                                                                     | 4.5E9                          |             | Buxton et al. (1988)          |
| A92008_a01  | TrAa01ScS       | $\text{HSO}_3^- + \text{HO}_2 \rightarrow \text{SO}_4^{2-} + \text{OH}^- + \text{H}^+$                                                          | 3.0E3                          |             | see note*                     |
| A92009_a01  | TrAa01MblScScmS | $\text{HSO}_3^- + \text{H}_2\text{O}_2 \rightarrow \text{SO}_4^{2-} + \text{H}^+$                                                               | 5.2E6                          | -3650       | Martin and Damschen (1981)    |
| A92010_a01  | TrAa01ScS       | $\text{HSO}_3^- + \text{SO}_4^- \rightarrow \text{SO}_3^- + \text{SO}_4^{2-} + \text{H}^+$                                                      | 8.0E8                          |             | Huie and Neta (1987)          |
| A92011_a01  | TrAa01S         | $\text{HSO}_3^- + \text{SO}_5^- \rightarrow .75 \text{SO}_4^- + .75 \text{SO}_4^{2-} + .75 \text{H}^+ + .25 \text{SO}_3^- + .25 \text{HSO}_5^-$ | 1.0E5                          |             | Huie and Neta (1987)          |
| A92012_a01  | TrAa01ScS       | $\text{HSO}_3^- + \text{HSO}_5^- + \text{H}^+ \rightarrow 2 \text{HSO}_4^- + \text{H}^+$                                                        | 7.1E6                          |             | Betterton and Hoffmann (1988) |
| A93001_a01  | TrAa01ScNS      | $\text{SO}_4^- + \text{NO}_3^- \rightarrow \text{SO}_4^{2-} + \text{NO}_3$                                                                      | 5.0E4                          |             | Exner et al. (1992)           |
| A93002_a01  | TrAa01ScNS      | $\text{SO}_4^{2-} + \text{NO}_3 \rightarrow \text{NO}_3^- + \text{SO}_4^-$                                                                      | 1.0E5                          |             | Løgager et al. (1993)         |
| A93004_a01  | TrAa01ScNS      | $\text{HSO}_3^- + \text{NO}_3 \rightarrow \text{SO}_3^- + \text{NO}_3^- + \text{H}^+$                                                           | 1.4E9                          | -2000       | Exner et al. (1992)           |
| A93005_a01  | TrAa01ScNS      | $\text{HSO}_3^- + \text{HNO}_4 \rightarrow \text{HSO}_4^- + \text{NO}_3^- + \text{H}^+$                                                         | 3.1E5                          |             | Warneck (1999)                |
| A930MS_a01  | TrAa01ScNS      | $\text{SO}_4^{2-} + \text{NO}_2^+ \rightarrow \text{SO}_4^- + \text{NO}_3^- + 2 \text{H}^+$                                                     | 7.5E9                          |             | Staudt et al. (2019)*         |
| A94100_a01  | TrAa01ScS       | $\text{SO}_3^{2-} + \text{HCHO} \rightarrow \text{CH}_2\text{OH}\text{SO}_3^- + \text{OH}^-$                                                    | 1.4E4                          |             | Boyce and Hoffmann (1984)*    |
| A94101_a01  | TrAa01ScS       | $\text{SO}_3^{2-} + \text{CH}_3\text{OOH} + \text{H}^+ \rightarrow \text{SO}_4^{2-} + \text{H}^+ + \text{CH}_3\text{OH}$                        | 1.6E7                          | -3800       | Lind et al. (1987)            |
| A94102_a01  | TrAa01ScS       | $\text{HSO}_3^- + \text{HCHO} \rightarrow \text{CH}_2\text{OH}\text{SO}_3^-$                                                                    | 4.3E-1                         |             | Boyce and Hoffmann (1984)*    |
| A94103_a01  | TrAa01ScS       | $\text{HSO}_3^- + \text{CH}_3\text{OOH} + \text{H}^+ \rightarrow \text{HSO}_4^- + \text{H}^+ + \text{CH}_3\text{OH}$                            | 1.6E7                          | -3800       | Lind et al. (1987)            |
| A94104_a01  | TrAa01ScS       | $\text{HSO}_3^- + \text{CH}_3\text{OO} \rightarrow \text{SO}_3^- + \text{CH}_3\text{OOH}$                                                       | 5.00E5                         |             | Herrmann et al. (1999b)       |
| A94105_a01  | TrAa01ScS       | $\text{SO}_4^- + \text{HCOO}^- \rightarrow \text{SO}_4^{2-} + \text{CO}_2 + \text{HO}_2$                                                        | 1.7E8                          | -1500       | Jacob (1986)                  |
| A94106_a01  | TrAa01ScS       | $\text{SO}_4^- + \text{HCOOH} \rightarrow \text{SO}_4^{2-} + \text{CO}_2 + \text{H}^+ + \text{HO}_2$                                            | 1.7E8                          | -1500       | Jacob (1986)                  |
| A94107_a01  | TrAa01ScS       | $\text{SO}_4^- + \text{CH}_3\text{OH} \rightarrow \text{SO}_4^{2-} + \text{HOCH}_2\text{O}_2 + \text{H}^+$                                      | 9.039E+06                      | -2190       | Clifton and Huie (1989)       |
| A94108a_a01 | TrAa01ScS       | $\text{SO}_4^- + \text{CH}_3\text{OOH} \rightarrow \text{SO}_4^{2-} + \text{CH}_3\text{OO} + \text{H}^+$                                        | $0.25 \times 1.20\text{E}7$    |             | see note*                     |
| A94108b_a01 | TrAa01ScS       | $\text{SO}_4^- + \text{CH}_3\text{OOH} \rightarrow \text{SO}_4^{2-} + \text{HCHO} + \text{HO}_2 + \text{H}^+$                                   | $0.75 \times 1.20\text{E}7$    |             | see note*                     |
| A94109_a01  | TrAa01ScS       | $\text{SO}_4^- + \text{HOCH}_2\text{OH} \rightarrow \text{SO}_4^{2-} + \text{HCOHOHO}_2 + \text{H}^+$                                           | 1.40E7                         | -1300       | Buxton et al. (1990)          |
| A94110_a01  | TrAa01ScS       | $\text{SO}_5^- + \text{HCOO}^- \rightarrow \text{HSO}_5^- + \text{CO}_2 + \text{O}_2^-$                                                         | 1.4E4                          | -4000       | Jacob (1986)                  |
| A94111_a01  | TrAa01ScS       | $\text{CH}_2\text{OH}\text{SO}_3^- + \text{OH}^- \rightarrow \text{SO}_3^{2-} + \text{HCHO}$                                                    | 3.6E3                          |             | Seinfeld and Pandis (1998)    |
| A94200_a01  | TrAa01ScCS      | $\text{HSO}_3^- + \text{CH}_2\text{OOC}\text{COOH} \rightarrow \text{SO}_3^- + \text{HOOCH}_2\text{CO}_2\text{H}$                               | 5.00E5                         |             | see note*                     |
| A94201_a01  | TrAa01ScCS      | $\text{HSO}_3^- + \text{CH}_2\text{OOC}\text{CO}_2^- \rightarrow \text{SO}_3^- + \text{CH}_2\text{OOH}\text{CO}_2^-$                            | 5.00E5                         |             | see note*                     |
| A94202a_a01 | TrAa01ScCS      | $\text{SO}_4^- + \text{CH}_3\text{CH}_2\text{OH} \rightarrow \text{SO}_4^{2-} + \text{CH}_3\text{CHO} + \text{HO}_2 + \text{H}^+$               | $0.90 \times 4.236\text{E}+07$ | -1750       | Clifton and Huie (1989)*      |
| A94202b_a01 | TrAa01ScCS      | $\text{SO}_4^- + \text{CH}_3\text{CH}_2\text{OH} \rightarrow \text{SO}_4^{2-} + \text{CH}_2\text{OHCH}_2\text{OO} + \text{H}^+$                 | $0.10 \times 4.236\text{E}+07$ | -1750       | Clifton and Huie (1989)       |

Table 6: Aqueous phase reactions (...continued)

| #            | labels       | reaction                                                                                                  | $k_0 [M^{1-n}s^{-1}]$ | $-E_a/R[K]$ | reference                |
|--------------|--------------|-----------------------------------------------------------------------------------------------------------|-----------------------|-------------|--------------------------|
| A94203a_a01  | TrAa01ScCS   | $SO_4^- + \text{CHOHOHCHOHOH} \rightarrow SO_4^{2-} + \text{CHOHOHCHOHOH}_2 + H^+$                        | $0.27 \times 2.40E7$  |             | George et al. (2001)     |
| A94203b_a01  | TrAa01ScCS   | $SO_4^- + \text{CHOHOHCHOHOH} \rightarrow SO_4^{2-} + \text{HCOHOH}_2 + \text{HCOOH} + \text{HO}_2 + H^+$ | $0.73 \times 2.40E7$  |             | George et al. (2001)*    |
| A94204_a01   | TrAa01ScCS   | $SO_4^- + \text{CH}_3\text{COO}^- \rightarrow SO_4^{2-} + \text{CH}_2\text{OOCO}_2^- + H^+$               | 5.10E6                |             | Huie and Clifton (1990)  |
| A94205_a01   | TrAa01ScCS   | $SO_4^- + \text{HOCCOO}^- \rightarrow SO_4^{2-} + \text{C}_2\text{O}_4^- + H^+$                           | 1.70E6                |             | Grgić et al. (2007)      |
| A94206_a01   | TrAa01ScCS   | $SO_4^- + \text{C}_2\text{O}_4^{2-} \rightarrow SO_4^{2-} + \text{C}_2\text{O}_4^-$                       | 1.30E7                |             | Grgić et al. (2007)      |
| A96000_a01   | TrAa01ClS    | $SO_3^{2-} + \text{Cl}_2 \rightarrow SO_3^- + 2 \text{Cl}^-$                                              | 6.2E7                 |             | Jacobi et al. (1996)     |
| A96001_a01   | TrAa01MblClS | $SO_3^{2-} + \text{HOCl} \rightarrow \text{Cl}^- + \text{HSO}_4^-$                                        | 7.6E8                 |             | Fogelman et al. (1989)   |
| A96002_a01   | TrAa01ClS    | $SO_4^- + \text{Cl}^- \rightarrow SO_4^{2-} + \text{Cl}$                                                  | 2.5E8                 |             | Buxton et al. (1999a)    |
| A96003_a01   | TrAa01ClS    | $SO_4^{2-} + \text{Cl} \rightarrow SO_4^- + \text{Cl}^-$                                                  | 2.1E8                 |             | Buxton et al. (1999a)    |
| A96004_a01   | TrAa01ClS    | $\text{HSO}_3^- + \text{Cl}_2 \rightarrow \text{SO}_3^- + 2 \text{Cl}^- + H^+$                            | 4.7E8                 | -1082       | Shoute et al. (1991)     |
| A96005_a01   | TrAa01MblClS | $\text{HSO}_3^- + \text{HOCl} \rightarrow \text{Cl}^- + \text{HSO}_4^- + H^+$                             | 7.6E8                 |             | see note*                |
| A96006_a01   | TrAa01ClS    | $\text{HSO}_5^- + \text{Cl}^- \rightarrow \text{HOCl} + \text{SO}_4^{2-}$                                 | 1.8E-3                | -7352       | Fortnum et al. (1960)    |
| A97000_a01   | TrAa01BrS    | $SO_3^{2-} + \text{Br}_2^- \rightarrow 2 \text{Br}^- + \text{SO}_3^-$                                     | 2.2E8                 | -649        | Shoute et al. (1991)     |
| A97001_a01   | TrAa01BrS    | $SO_3^{2-} + \text{BrO}^- \rightarrow \text{Br}^- + \text{SO}_4^{2-}$                                     | 1.0E8                 |             | Troy and Margerum (1991) |
| A97002_a01   | TrAa01MblBrS | $SO_3^{2-} + \text{HOBr} \rightarrow \text{Br}^- + \text{HSO}_4^-$                                        | 5.0E9                 |             | Troy and Margerum (1991) |
| A97003_a01   | TrAa01BrS    | $SO_4^- + \text{Br}^- \rightarrow \text{Br} + \text{SO}_4^{2-}$                                           | 2.1E9                 |             | Jacobi (1996)            |
| A97004_a01   | TrAa01BrS    | $\text{HSO}_3^- + \text{Br}_2^- \rightarrow 2 \text{Br}^- + H^+ + \text{SO}_3^-$                          | 6.3E7                 | -782        | Shoute et al. (1991)     |
| A97005_a01   | TrAa01MblBrS | $\text{HSO}_3^- + \text{HOBr} \rightarrow \text{Br}^- + \text{HSO}_4^- + H^+$                             | 5.0E9                 |             | see note*                |
| A97006_a01   | TrAa01BrS    | $\text{HSO}_5^- + \text{Br}^- \rightarrow \text{HOBr} + \text{SO}_4^{2-}$                                 | 1.0E0                 | -5338       | Fogelman et al. (1989)   |
| A111001_a01  | TrAa01Fe     | $\text{Fe}^{2+} + \text{O}_2^- \rightarrow \text{Fe}^{3+} + \text{HO}_2^- + \text{OH}^-$                  | 1E7                   |             | de Laat and Le (2006)    |
| A111002_a01  | TrAa01Fe     | $\text{Fe}^{3+} + \text{O}_2^- \rightarrow \text{O}_2 + \text{Fe}^{2+}$                                   | 5E7                   |             | de Laat and Le (2006)    |
| A111003_a01  | TrAa01Fe     | $\text{Fe}^{2+} + \text{O}_3 \rightarrow \text{FeO}^{2+} + \text{O}_2$                                    | 8.2E5                 |             | Løgager et al. (1992)    |
| A112001a_a01 | TrAa01Fe     | $\text{Fe}^{2+} + \text{OH} \rightarrow \text{Fe}^{3+} + \text{OH}^-$                                     | 2.7E8                 |             | de Laat and Le (2006)    |
| A112001b_a01 | TrAa01Fe     | $\text{FeOH}^+ + \text{OH} \rightarrow \text{Fe}^{3+} + 2 \text{OH}^-$                                    | 2.7E8                 |             | de Laat and Le (2006)    |
| A112002a_a01 | TrAa01Fe     | $\text{Fe}^{2+} + \text{H}_2\text{O}_2 \rightarrow \text{Fe}^{3+} + \text{OH} + \text{OH}^-$              | 5.5E1                 |             | de Laat and Le (2006)    |
| A112002b_a01 | TrAa01Fe     | $\text{FeOH}^+ + \text{H}_2\text{O}_2 \rightarrow \text{Fe}^{3+} + \text{OH} + 2 \text{OH}^-$             | 5.9E6                 |             | de Laat and Le (2006)    |
| A112003_a01  | TrAa01Fe     | $\text{FeHO}_2^+ \rightarrow \text{Fe}^{2+} + \text{HO}_2$                                                | 2.3E-3                |             | de Laat and Le (2006)    |
| A112004_a01  | TrAa01Fe     | $\text{Fe}(\text{OH})(\text{HO}_2)^+ \rightarrow \text{Fe}^{2+} + \text{HO}_2 + \text{OH}^-$              | 2.3E-3                |             | de Laat and Le (2006)    |
| A112006_a01  | TrAa01Fe     | $\text{Fe}^{2+} + \text{HO}_2 \rightarrow \text{Fe}^{3+} + \text{HO}_2^-$                                 | 1.2E6                 |             | de Laat and Le (2006)    |
| A112008a_a01 | TrAa01Fe     | $\text{FeOH}^{2+} + \text{O}_2^- \rightarrow \text{Fe}^{2+} + \text{O}_2 + \text{OH}^-$                   | 1.5E8                 |             | Rush and Bielski (1985)  |
| A112008b_a01 | TrAa01Fe     | $\text{Fe}(\text{OH})_2^+ + \text{O}_2^- \rightarrow \text{Fe}^{2+} + \text{O}_2 + 2 \text{OH}^-$         | 1.5E8                 |             | Rush and Bielski (1985)  |
| A112009_a01  | TrAa01Fe     | $\text{Fe}^{2+} + \text{O}_2^- \rightarrow \text{Fe}^{3+} + \text{H}_2\text{O}_2 + 2 \text{OH}^-$         | 1.0E7                 |             | Rush and Bielski (1985)  |

Table 6: Aqueous phase reactions (...continued)

| #            | labels     | reaction                                                    | $k_0 [M^{1-n} s^{-1}]$ | $-E_a/R[K]$ | reference                       |
|--------------|------------|-------------------------------------------------------------|------------------------|-------------|---------------------------------|
| A112010_a01  | TrAa01Fe   | $Fe^{2+} + OH \rightarrow FeOH^{2+}$                        | 4.3E8                  |             | Christensen and Sehested (1981) |
| A112011_a01  | TrAa01Fe   | $FeO^{2+} + H_2O_2 \rightarrow Fe^{3+} + HO_2 + OH^-$       | 9.5E3                  |             | Løgager et al. (1992)           |
| A112012_a01  | TrAa01Fe   | $FeO^{2+} \rightarrow Fe^{3+} + OH + OH^-$                  | 1.3E-2                 |             | Løgager et al. (1992)           |
| A112013_a01  | TrAa01Fe   | $FeO^{2+} + HO_2 \rightarrow Fe^{3+} + O_2 + OH^-$          | 2.0E6                  |             | Løgager et al. (1992)           |
| A112014_a01  | TrAa01Fe   | $FeO^{2+} + OH \rightarrow Fe^{3+} + HO_2^-$                | 1.0E7                  |             | Løgager et al. (1992)           |
| A112015_a01  | TrAa01Fe   | $FeO^{2+} + Fe^{2+} \rightarrow 2 Fe^{3+} + 2 OH^-$         | 1.4E5                  |             | Løgager et al. (1992)           |
| A112016_a01  | TrAa01Fe   | $FeO^{2+} + Fe^{2+} \rightarrow Fe(OH)_2Fe^{4+}$            | 1.8E4                  |             | Jacobsen et al. (1997)          |
| A112017_a01  | TrAa01Fe   | $Fe(OH)_2Fe^{4+} + H^+ \rightarrow 2 Fe^{3+} + OH^-$        | 2.0                    |             | Jacobsen et al. (1997)          |
| A112018_a01  | TrAa01Fe   | $Fe(OH)_2Fe^{4+} \rightarrow 2 Fe^{3+} + 2 OH^-$            | 0.49                   |             | Jacobsen et al. (1997)          |
| A113001_a01  | TrAa01FeN  | $FeO^{2+} + HONO \rightarrow Fe^{3+} + NO_2 + OH^-$         | 1.1E4                  |             | Jacobsen et al. (1998)          |
| A113002_a01  | TrAa01FeN  | $Fe^{2+} + NO_3 \rightarrow Fe^{3+} + NO_3^-$               | 8.0E6                  |             | Herrmann et al. (2000)          |
| A116001_a01  | TrAa01ClFe | $Fe^{2+} + Cl \rightarrow Fe^{3+} + Cl^-$                   | 5.9E9                  |             | Jayson et al. (1973)            |
| A116002a_a01 | TrAa01ClFe | $Fe^{2+} + Cl_2^- \rightarrow Fe^{3+} + 2 Cl^-$             | 1E7                    |             | Thornton and Laurence (1973)    |
| A116002b_a01 | TrAa01ClFe | $Fe^{2+} + Cl_2^- \rightarrow FeCl^{2+} + Cl^-$             | 4E6                    |             | Thornton and Laurence (1973)    |
| A116003a_a01 | TrAa01ClFe | $FeCl^+ + HO_2 \rightarrow Fe^{3+} + Cl^- + HO_2^-$         | 1.2E6                  |             | de Laat and Le (2006)           |
| A116003b_a01 | TrAa01ClFe | $FeCl^+ + O_2^- \rightarrow Fe^{3+} + Cl^- + HO_2^- + OH^-$ | 1E7                    |             | de Laat and Le (2006)           |
| A116004a_a01 | TrAa01ClFe | $FeCl^{2+} + HO_2 \rightarrow Fe^{2+} + Cl^- + O_2 + H^+$   | 2E4                    |             | de Laat and Le (2006)           |
| A116004b_a01 | TrAa01ClFe | $FeCl_2^+ + HO_2 \rightarrow Fe^{2+} + 2 Cl^- + O_2 + H^+$  | 2E4                    |             | de Laat and Le (2006)           |
| A116004c_a01 | TrAa01ClFe | $FeCl^{2+} + O_2^- \rightarrow Fe^{2+} + Cl^- + O_2$        | 5E7                    |             | de Laat and Le (2006)           |
| A116004d_a01 | TrAa01ClFe | $FeCl_2^+ + O_2^- \rightarrow Fe^{2+} + 2 Cl^- + O_2$       | 5E7                    |             | de Laat and Le (2006)           |
| A116005_a01  | TrAa01ClFe | $FeO^{2+} + Cl^- \rightarrow Fe^{3+} + Cl + 2 OH^-$         | 1E2                    |             | Jacobsen et al. (1998)*         |
| A117001_a01  | TrAa01BrFe | $Fe^{2+} + Br_2^- \rightarrow Fe^{3+} + 2 Br^-$             | 3.6E6                  |             | Thornton and Laurence (1973)    |
| A119001_a01  | TrAa01FeS  | $FeO^{2+} + SO_2 \rightarrow Fe^{3+} + SO_3^-$              | 4.5E5                  |             | Jacobsen et al. (1998)*         |
| A119002_a01  | TrAa01FeS  | $FeO^{2+} + HSO_3^- \rightarrow Fe^{3+} + SO_3^- + OH^-$    | 2.5E5                  |             | Jacobsen et al. (1998)*         |
| A119003_a01  | TrAa01FeS  | $FeOH^{2+} + HSO_3^- \rightarrow Fe^{2+} + SO_3^- + H_2O$   | 30                     |             | Ziajka et al. (1994)            |
| A119004_a01  | TrAa01FeS  | $Fe^{2+} + SO_5^- \rightarrow FeOH^{2+} + HSO_5^-$          | 8E5                    |             | Ziajka et al. (1994)*           |
| A119005_a01  | TrAa01FeS  | $Fe^{2+} + HSO_5^- \rightarrow FeOH^{2+} + SO_4^-$          | 3.0E4                  |             | Gilbert and Stell (1990)        |
| A119006_a01  | TrAa01FeS  | $Fe^{2+} + SO_4^- \rightarrow FeSO_4^+$                     | 3.6E7                  |             | McElroy and Waygood (1990)*     |
| A119007_a01  | TrAa01FeS  | $FeOH^{2+} + SO_3^- \rightarrow Fe^{2+} + HSO_4^-$          | 3E7                    |             | Warneck (2018)                  |
| A119008_a01  | TrAa01FeS  | $FeSO_3^+ + SO_3^- \rightarrow Fe^{2+} + SO_4^{2-} + SO_2$  | 2.16E6                 |             | Warneck (2018)*                 |

## Specific notes

Staudt et al. (2019).

(1985).

A311MS\_a01: Rate constant derived from  $k_3/k_2b = 6.E-2$  in Bertram and Thornton (2009) and  $k_3 = 1.7E5$  in

A321MS\_a01: Rate constant is derived from  $k(NO_2p + H_2O)/K(NO_2p)$ , where  $K(NO_2p)$  is  $1E16$  Sampoli et al.

A41013a\_a01: Branching ratios taken from Asmus et al. (1973)

**A41016a\_a01:** Branching ratio explaining the HCOOH-yield by Monod et al. (2007) who originally assigned it to the channel for the methylic H-abstraction. However, Monod et al. (2007), differently from Herrmann et al. (1999b), assumed that the self-reaction of CH<sub>3</sub>O<sub>2</sub> would only produce 2 CH<sub>3</sub>O radicals and thus HCHO + HO<sub>2</sub>. Instead, the latter reaction has a 0.8 yield of HOCH<sub>2</sub>O<sub>2</sub>, which is a precursor of hydroxymethyl hydroperoxide and thus HCOOH.

**A41016b\_a01:** The CH<sub>2</sub>OOH radical has a lifetime of 10<sup>-9</sup> s in the gas phase decomposing to HCHO and OH. O<sub>2</sub>-addition in the aqueous-phase seems unlikely. It is hard to imagine how the HOOHCH<sub>2</sub>O<sub>2</sub> radical would decompose into HCOOH and HO<sub>2</sub>.

**A41017a\_a01:**  $k(\text{H}_2\text{O}_2 + \text{NO}_3)$ , branching ratio as for CH<sub>3</sub>OOH + OH

**A41017b\_a01:** See branch a.

**A41018a\_a01:**  $k(\text{H}_2\text{O}_2 + \text{CO}_3^-)$ , branching ratio as for CH<sub>3</sub>OOH + OH

**A41018b\_a01:** See branch a.

**A41019a\_a01:** Branching ratio as for CH<sub>3</sub>OOH + OH

**A41019b\_a01:** HOCHOOHO<sub>2</sub> is assumed to directly decompose into CHOOOH and HO<sub>2</sub>

**A41020a\_a01:**  $k(\text{H}_2\text{O}_2 + \text{NO}_3)$ , branching ratio as for CH<sub>3</sub>OOH + OH

**A41020b\_a01:** HOCHOOHO<sub>2</sub> is assumed to directly decompose into CHOOOH and HO<sub>2</sub>

**A41021\_a01:** HO<sub>2</sub> elimination

**A41022\_a01:**  $k(\text{HO}_2 + \text{HO}_2)$

**A41023\_a01:**  $k(\text{HO}_2 + \text{O}_2^-)$

**A41030\_a01:** HO<sub>2</sub> elimination

**A42000a\_a01:** CH<sub>3</sub>CHOHO<sub>2</sub> is assumed to directly decompose into CH<sub>3</sub>CHO + HO<sub>2</sub>

**A42001a\_a01:** CH<sub>3</sub>CHOHO<sub>2</sub> is assumed to directly decompose into CH<sub>3</sub>CHO + HO<sub>2</sub>

**A42003\_a01:**  $k(\text{HO}_2 + \text{O}_2^-)$

**A42004\_a01:**  $k(\text{HO}_2 + \text{HO}_2)$

**A42005\_a01:**  $k$  approximated from  $(k(\text{CH}_3\text{OOH} + \text{OH}) / k(\text{CH}_3\text{OH} + \text{OH}))$

**A42006\_a01:** CH<sub>2</sub>OHCHOHO<sub>2</sub> is assumed to directly decompose into HOCH<sub>2</sub>CHO + HO<sub>2</sub>

**A42007\_a01:** CH<sub>2</sub>OHCHOHO<sub>2</sub> is assumed to directly decompose into HOCH<sub>2</sub>CHO + HO<sub>2</sub>

**A42010\_a01:**  $k$  based on Monod et al. (2005):  $k = k(2 \text{CH}_3\text{CH}_2(\text{OO}))$

**A42014\_a01:** HO<sub>2</sub> elimination

**A42016a\_a01:**  $k$  assumed to be the same as for CH<sub>3</sub>CHO + NO<sub>3</sub>

**A42016b\_a01:** See branch a.

**A42017\_a01:**  $k(\text{CH}_3\text{CHOHOH} + \text{O}_2^-)$

**A42018\_a01:** HO<sub>2</sub> elimination

**A42019\_a01:**  $k$  based on von Sonntag (1987)

**A42020\_a01:**  $k$  based on von Sonntag (1987)

**A42022a\_a01:**  $k(\text{CH}_3\text{CHOHOH} + \text{NO}_3)$

**A42022b\_a01:** See branch a.

**A42022c\_a01:** See branch a.

**A42023b\_a01:** CHOHOHO<sub>2</sub> directly decomposes into HCOOH + HO<sub>2</sub>

**A42024a\_a01:**  $k$  based on Neta and Huie (1986)

**A42024b\_a01:** CHOHOHO<sub>2</sub> directly decomposes into HCOOH + HO<sub>2</sub>

**A42025\_a01:** HO<sub>2</sub> elimination

**A42030b\_a01:** CH<sub>3</sub>CHOOHO<sub>2</sub> is assumed to directly decompose into CH<sub>3</sub>CO<sub>2</sub>H and HO<sub>2</sub>

**A42031b\_a01:** CH<sub>3</sub>CHOHO<sub>2</sub> is assumed to directly decompose into CH<sub>3</sub>CHO + HO<sub>2</sub>

**A42032\_a01:**  $k(\text{HO}_2 + \text{O}_2^-)$

**A42033\_a01:**  $k(\text{HO}_2 + \text{HO}_2)$

**A42034\_a01:**  $k(\text{HO}_2 + \text{HO}_2)$

**A42035\_a01:**  $k(\text{HO}_2 + \text{O}_2^-)$

**A42037\_a01:**  $k(\text{HO}_2 + \text{HO}_2)$

**A42038\_a01:**  $k(\text{HO}_2 + \text{O}_2^-)$

**A42144a\_a01:**  $k$  assumed to be the same as C<sub>2</sub>H<sub>5</sub>OOH + OH based on Monod et al. (2007)

**A42144b\_a01:** See branch a.

**A42146a\_a01:**  $k$  assumed to be the same as C<sub>2</sub>H<sub>5</sub>OOH + OH based on Monod et al. (2007)

**A42146b\_a01:** See branch a.

**A42148\_a01:** HO<sub>2</sub> elimination

**A42149\_a01:** HO<sub>2</sub> elimination

**A42150a\_a01:** COOHOO is not formed but directly dissociates into CO<sub>2</sub> + HO<sub>2</sub>. Rate coefficient based on Buxton et al. (1988)

**A42150b\_a01:** See branch a.

**A42151a\_a01:** COOHOO is not formed but directly dissociates into CO<sub>2</sub> + HO<sub>2</sub>. Rate coefficient based on Gaillard de Sémainville et al. (2007)

**A42151b\_a01:** See branch a.

**A42156b\_a01:** COOHOO is not formed but directly dissociates into CO<sub>2</sub> + HO<sub>2</sub>.

**A42157a\_a01:**  $k(\text{CHOHOHCHOHOH} + \text{NO}_3)$

**A42157b\_a01:** COOHOO is not formed but directly dissociates into CO<sub>2</sub> + HO<sub>2</sub>

**A42161\_a01:** HO<sub>2</sub> elimination

**A42162\_a01:** HO<sub>2</sub> elimination

**A42163a\_a01:**  $k(\text{HOCH}_2\text{CHO} + \text{OH})$

**A42163b\_a01:** See branch a.

|                                                                                                                                               |                                                                                                                                                                                       |                                                                                                                                                                                                                                                                                                                                                                                                                 |
|-----------------------------------------------------------------------------------------------------------------------------------------------|---------------------------------------------------------------------------------------------------------------------------------------------------------------------------------------|-----------------------------------------------------------------------------------------------------------------------------------------------------------------------------------------------------------------------------------------------------------------------------------------------------------------------------------------------------------------------------------------------------------------|
| A42164a_a01: $k(\text{HOCH}_2\text{CHO}+\text{NO}_3)$                                                                                         | A43015a_a01: $k$ calculated comparing the rates $(\text{CH}_3\text{OH} + \text{OH}/\text{CH}_3\text{OOH} + \text{OH})$ and $(\text{ACETOL} + \text{OH}/\text{HYPERACET} + \text{OH})$ | assume that only 2-nitrophenol is formed like in the gas phase.                                                                                                                                                                                                                                                                                                                                                 |
| A42164b_a01: See branch a.                                                                                                                    |                                                                                                                                                                                       |                                                                                                                                                                                                                                                                                                                                                                                                                 |
| A42165a_a01: $k(\text{HOCH}_2\text{CHOHOH}+\text{OH})$                                                                                        | A43015b_a01: $k$ from $\text{CH}_3\text{OOH} + \text{OH} \rightarrow \text{HCHO}$ .                                                                                                   | A61002_a01: Jacobi (1996) found an upper limit of 6E9 and cite an upper limit from another study of 2E9. Here, we set the rate coefficient to 1E9.                                                                                                                                                                                                                                                              |
| A42165b_a01: See branch a.                                                                                                                    |                                                                                                                                                                                       |                                                                                                                                                                                                                                                                                                                                                                                                                 |
| A42165c_a01: See branch a.                                                                                                                    | A43016_a01: $k$ taken from the reaction of the hydrated form of MGLYOX and $\text{NO}_3$                                                                                              | A63001_a01: There is also an earlier study by Exner et al. (1992) which found a smaller rate coefficient but did not consider the back reaction.                                                                                                                                                                                                                                                                |
| A42166a_a01: $k(\text{HOCH}_2\text{CHOHOH}+\text{NO}_3)$                                                                                      | A43017_a01: $k$ from $\text{CH}_3\text{O}_2 + \text{HO}_2$                                                                                                                            | A64000_a01: $k$ taken from $\text{H}_2\text{O}_2+\text{Cl}_2^-$ (Yu, 2004).                                                                                                                                                                                                                                                                                                                                     |
| A42166b_a01: See branch a.                                                                                                                    | A43018_a01: $k$ from $\text{CH}_3\text{O}_2 + \text{O}_2^-$                                                                                                                           | A74000_a01: Assumed to be the same as for $\text{Br}_2^- + \text{H}_2\text{O}_2$ .                                                                                                                                                                                                                                                                                                                              |
| A42166c_a01: See branch a.                                                                                                                    | A43019a_a01: $k$ calculated comparing $\text{CH}_3\text{OH} + \text{OH} / \text{CH}_3\text{OOH} + \text{OH}$ with $\text{IPROPL} + \text{OH}$                                         | A76003_a01: The rate coefficient is defined as backward reaction divided by equilibrium constant.                                                                                                                                                                                                                                                                                                               |
| A42167_a01: pH-dependent                                                                                                                      | A43019b_a01: $k$ calculated comparing $\text{CH}_3\text{OH} + \text{OH} / \text{CH}_3\text{OOH} + \text{OH}$ with $\text{ACETOL} + \text{OH} / \text{HYPERCET} + \text{OH}$           | A91005_a01: The rate coefficient for the sum of the paths (leading to either $\text{HSO}_5^-$ or $\text{SO}_4^{2-}$ ) is from Huie and Neta (1987), the ratio 0.28/0.72 is from Deister and Warneck (1990).                                                                                                                                                                                                     |
| A42169_a01: $k = 2 \times k(\text{HOCH}_2\text{OH}+\text{OH})$                                                                                | A43020_a01: $k$ taken from the reaction of the hydrated form of MGLYOX and $\text{NO}_3$                                                                                              | A91006_a01: See also: (Huie and Neta, 1987; Warneck, 1991). If this reaction produces a lot of $\text{SO}_4^{2-}$ , it will have an effect. However, we currently assume only the stable $\text{S}_2\text{O}_8^{2-}$ as product. Since $\text{S}_2\text{O}_8^{2-}$ is not treated explicitly in the mechanism, $\text{SO}_4^{2-}$ is used as a proxy and the second sulfur atom is put into the lumped LSULFUR. |
| A42471_a01: Assumed to be the same as $\text{CH}_3\text{CO}_3 + \text{H}_2\text{O}$ , following Villalta et al. (1996)                        | A43021_a01: $k$ from $\text{CH}_3\text{O}_2 + \text{HO}_2$                                                                                                                            | A92005_a01: D. Sedlak, pers. comm. (1993).                                                                                                                                                                                                                                                                                                                                                                      |
| A42472_a01: Assumed to be the same as $\text{CH}_3\text{CO}_3 + \text{H}_2\text{O}$ , following Villalta et al. (1996)                        | A43022_a01: $k$ from $\text{CH}_3\text{O}_2 + \text{O}_2^-$                                                                                                                           | A92008_a01: D. Sedlak, pers. comm. (1993).                                                                                                                                                                                                                                                                                                                                                                      |
| A42473_a01: Assumed to be the same as $\text{CH}_3\text{CO}_3 + \text{H}_2\text{O}$ , following Villalta et al. (1996)                        | A43023_a01: pH-dependent                                                                                                                                                              | A930MS_a01: As suggested in Staudt et al., 2019 intermediate product is $\text{NO}_2\text{SO}_4^-$ , which readily reacts with $\text{H}_2\text{O}$ and produce final products                                                                                                                                                                                                                                  |
| A43000a_a01: Intermdiate reaction with $\text{O}_2^-$ and $\text{CH}(\text{OH})_2\text{COCH}_2\text{O}_2$ neglected                           | A43025_a01: $k = 2 \times k(\text{HOCH}_2\text{OH}+\text{OH})$                                                                                                                        | A94100_a01: $2.48 \times 10^7 \times 5.5 \times 10^{-4}$ , considering the hydrated form of HCHO.                                                                                                                                                                                                                                                                                                               |
| A43001_a01: $\text{CH}(\text{OH})_2\text{COCH}_2\text{O}_2$ neglected                                                                         | A44010_a01: $k = 2 \times k(\text{CHOHOHCHOHOH}+\text{OH})$                                                                                                                           | A94102_a01: $790 \times 5.5 \times 10^{-4}$ , considering the hydrated form of HCHO.                                                                                                                                                                                                                                                                                                                            |
| A43002_a01: $\text{CO}_2$ added for mass balance intermediate reactions neglected                                                             | A44011_a01: $k = 2 \times k(\text{CHOHOHCHOHOH}+\text{OH})$                                                                                                                           | A94108a_a01: $k(\text{H}_2\text{O}_2+\text{SO}_4^-)$ , branching ratio as for $\text{CH}_3\text{OOH} + \text{OH}$                                                                                                                                                                                                                                                                                               |
| A43004_a01: $\text{CO}_2$ added for mass balance intermediate reactions neglected                                                             | A44012_a01: $k = 2 \times k(\text{CHOHOHCHOHOH}+\text{OH})$                                                                                                                           |                                                                                                                                                                                                                                                                                                                                                                                                                 |
| A43010a_a01: $\text{CH}_2(\text{OH})\text{COCH}_2\text{O}_2$ was neglected with a branching ratio 0.16 added to $\text{CH}_3\text{COCHOHO}_2$ | A46000_a01: Assumed to be the same as for glyoxal                                                                                                                                     |                                                                                                                                                                                                                                                                                                                                                                                                                 |
| A43013_a01: There is an intermediate reaction with branching ratio 0.87 and 0.13, the minor compound is neglected (Monod et al., 2005)        | A46001_a01: Assumed to be the same as for glyoxal                                                                                                                                     |                                                                                                                                                                                                                                                                                                                                                                                                                 |
| A43014_a01: There is an intermediate reaction with branching ratio 0.87 and 0.13, the minor compound is neglected (Herrmann et al., 1994)     | A46002_a01: $k = 2 \times k(\text{CH}_3\text{COCHOHOH}+\text{OH})$                                                                                                                    |                                                                                                                                                                                                                                                                                                                                                                                                                 |
|                                                                                                                                               | A46003_a01: Assumed to be the same as for glyoxal                                                                                                                                     |                                                                                                                                                                                                                                                                                                                                                                                                                 |
|                                                                                                                                               | A46004_a01: Assumed to be the same as for glyoxal                                                                                                                                     |                                                                                                                                                                                                                                                                                                                                                                                                                 |
|                                                                                                                                               | A46005_a01: $k = 2 \times k(\text{CH}_3\text{COCHOHOH}+\text{OH})$                                                                                                                    |                                                                                                                                                                                                                                                                                                                                                                                                                 |
|                                                                                                                                               | A460MS_a01: Ryder et al. say that $k$ is the same as for $\text{NO}_2^+ + \text{chloride}$ ; In reality 6% 4-nitrophenol, 80% 4-nitrosophenol and 14% 2-nitrophenol is formed but we  |                                                                                                                                                                                                                                                                                                                                                                                                                 |

|                                                                                                                      |                                                                              |                                                                                                                                                                                                                                                                                                                                                                           |
|----------------------------------------------------------------------------------------------------------------------|------------------------------------------------------------------------------|---------------------------------------------------------------------------------------------------------------------------------------------------------------------------------------------------------------------------------------------------------------------------------------------------------------------------------------------------------------------------|
| A94108b_a01: See branch a.                                                                                           | A96005_a01: Assumed to be the same as for $\text{SO}_3^{2-} + \text{HOCl}$ . | A119004_a01: Assumed. Note that CAPRAM 2.4 lists $k=4.3\text{E}7$ from Herrmann Air Pollution Research Report 57 and it also lists $k=2.65\text{E}7$ from Williams PhD 1996 <a href="http://lib.leeds.ac.uk/record=b1835184~S5">http://lib.leeds.ac.uk/record=b1835184~S5</a> . Brand and van Eldik (1995) also list $k=3.56\text{E}4$ from Waygood EUROTRAC 1992 report. |
| A94200_a01: $k(\text{CH}_3\text{OO}+\text{HSO}_3^-)$                                                                 | A97005_a01: Assumed to be the same as for $\text{SO}_3^{2-} + \text{HOBr}$ . | A119006_a01: $3\text{E}8*6500/(48000+6500)$                                                                                                                                                                                                                                                                                                                               |
| A94201_a01: $k(\text{CH}_3\text{OO}+\text{HSO}_3^-)$                                                                 | A116005_a01: products assumed                                                | A119008_a01: Assuming that the intermediate $\text{S}_2\text{O}_6^{2-}$ dissociates quickly.                                                                                                                                                                                                                                                                              |
| A94202a_a01: $\text{CH}_3\text{CHOHO}_2$ is assumed to directly decompose into $\text{CH}_3\text{CHO} + \text{HO}_2$ | A119001_a01: products assumed                                                |                                                                                                                                                                                                                                                                                                                                                                           |
| A94203b_a01: $\text{CHOHOHO}_2$ directly decomposes into $\text{HCOOH} + \text{HO}_2$                                | A119002_a01: products assumed                                                |                                                                                                                                                                                                                                                                                                                                                                           |

## References

- Albaladejo, J., Jiménez, E., Notario, A., Cabañas, B., and Martínez, E.:  $\text{CH}_3\text{O}$  yield in the  $\text{CH}_3 + \text{O}_3$  reaction using the LP/LIF technique at room temperature, *J. Phys. Chem. A*, 106, 2512–2519, doi:10.1021/JP012249O, 2002.
- Amedro, D., Berasategui, M., Bunkan, A. J. C., Pozzer, A., Lelieveld, J., and Crowley, J. N.: Kinetics of the  $\text{OH} + \text{NO}_2$  reaction: effect of water vapour and new parameterization for global modelling, *Atmos. Chem. Phys.*, 20, 3091–3105, doi:10.5194/ACP-20-3091-2020, 2020.
- Anderson, L. C. and Fahey, D. W.: Studies with  $\text{ClONO}_2$ : Thermal dissociation rate and catalytic conversion to  $\text{NO}$  using an  $\text{NO/O}_3$  chemiluminescence detector, *J. Phys. Chem.*, 94, 644–652, doi:10.1021/J100365A027, 1990.
- Andrews, D. U., Heazlewood, B. R., Maccarone, A. T., Conroy, T., Payne, R. J., Jordan, M. J. T., and Kable, S. H.: Photo-tautomerization of acetaldehyde to vinyl alcohol: a potential route to tropospheric acids, *Science*, 337, 1203–1206, doi:10.1126/SCIENCE.1220712, 2012.
- Aschmann, S. M., Nishino, N., Arey, J., and Atkinson, R.: Products of the  $\text{OH}$  radical-initiated reactions of furan, 2- and 3-methylfuran, and 2,3- and 2,5-dimethylfuran in the presence of  $\text{NO}$ , *J. Phys. Chem. A*, 118, 457–466, doi:10.1021/JP410345K, 2014.
- Asmus, K. D., Moeckel, H., and Henglein, A.: Pulse radiolytic study of the site of hydroxyl radical attack on aliphatic alcohols in aqueous solution, *J. Phys. Chem.*, 77, 1218–1221, doi:10.1021/J100629A007, 1973.
- Atkinson, R.: Gas-phase tropospheric chemistry of volatile organic compounds: 1. Alkanes and alkenes, *J. Phys. Chem. Ref. Data*, 26, 215–290, doi:10.1063/1.556012, 1997.
- Atkinson, R.: Kinetics of the gas-phase reactions of  $\text{OH}$  radicals with alkanes and cycloalkanes, *Atmos. Chem. Phys.*, 3, 2233–2307, doi:10.5194/ACP-3-2233-2003, 2003.
- Atkinson, R. and Arey, J.: Atmospheric degradation of volatile organic compounds, *Chem. Rev.*, 103, 4605–4638, doi:10.1021/CR020642O, 2003.
- Atkinson, R., Baulch, D. L., Cox, R. A., Crowley, J. N., Hampson, R. F., Hynes, R. G., Jenkin, M. E., Rossi, M. J., and Troe, J.: Evaluated kinetic and photochemical data for atmospheric chemistry: Volume I – gas phase reactions of  $\text{O}_x$ ,  $\text{HO}_x$ ,  $\text{NO}_x$  and  $\text{SO}_x$  species, *Atmos. Chem. Phys.*, 4, 1461–1738, doi:10.5194/ACP-4-1461-2004, 2004.
- Atkinson, R., Baulch, D. L., Cox, R. A., Crowley, J. N., Hampson, R. F., Hynes, R. G., Jenkin, M. E., Rossi, M. J., Troe, J., and IUPAC Subcommittee: Evaluated kinetic and photochemical data for atmospheric chemistry: Volume II – gas phase reactions of organic species, *Atmos. Chem. Phys.*, 6, 3625–4055, doi:10.5194/ACP-6-3625-2006, 2006.
- Atkinson, R., Baulch, D. L., Cox, R. A., Crowley, J. N., Hampson, R. F., Hynes, R. G., Jenkin, M. E., Rossi, M. J., and Troe, J.: Evaluated kinetic and photochemical data for atmospheric chemistry: Volume III – gas phase reactions of inorganic halogens, *Atmos. Chem. Phys.*, 7, 981–1191, doi:10.5194/ACP-7-981-2007, 2007.
- Baeza-Romero, M. T., Glowacki, D. R., Blitz, M. A., Heard, D., Pilling, M. J., Rickard, A. R., and Seakins, P. W.: A combined experimental and theoretical study of the reaction between methylglyoxal and  $\text{OH/OD}$  radical:  $\text{OH}$  regeneration, *Phys. Chem. Chem. Phys.*, 9, 4114–4128, doi:10.1039/B702916K, 2007.
- Banic, C. M., Beauchamp, S. T., Tordon, R. J., Schroeder, W. H., Steffen, A., Anlauf, K. A., and Wong, H. K. T.: Vertical distribution of gaseous elemental mercury in Canada, *J. Geophys. Res.*, 108D, 4264, doi:10.1029/2002JD002116, 2003.
- Barker, G. C., Fowles, P., and Stringer, B.: Pulse radiolytic induced transient electrical conductance in liquid solutions, *Trans. Faraday Soc.*, 66, 1509–1519, doi:10.1039/TF9706601509, 1970.
- Barnes, I., Becker, K. H., Fink, E. H., Reimer, A., Zabel, F., and Niki, H.: FTIR spectroscopic study of the gas-phase reaction of  $\text{HO}_2$  with  $\text{H}_2\text{CO}$ , *Chem. Phys. Lett.*, 115, 1–8, doi:10.1016/0009-2614(85)80091-9, 1985.
- Barnes, I., Becker, K. H., and Zhu, T.: Near UV absorption-spectra and photolysis products of difunctional organic nitrates – possible importance as  $\text{NO}_x$  reservoirs, *J. Atmos. Chem.*, 17, 353–373, doi:10.1007/BF00696854, 1993.
- Barone, S. B., Turnipseed, A. A., and Ravishankara, A. R.: Role of adducts in the atmospheric oxidation of dimethyl sulfide, *Faraday Discuss.*, 100, 39–54, doi:10.1039/FD9950000039, 1995.
- Bates, K. H., Crounse, J. D., St. Clair, J. M., Bennett, N. B., Nguyen, T. B., Seinfeld, J. H., Stoltz, B. M., and Wennberg, P. O.: Gas phase production and loss of isoprene epoxydiols, *J. Phys. Chem. A*, 118, 1237–1246, doi:10.1021/JP4107958, 2014.



- Baulch, D. L., Bowman, C. T., Cobos, C. J., Cox, R. A., Just, T., Kerr, J. A., Pilling, M. J., Stocker, D., Troe, J., Tsang, W., Walker, R. W., and Warnatz, J.: Evaluated kinetic data for combustion modeling: Supplement II, *J. Phys. Chem. Ref. Data*, 34, 757–1397, doi:10.1063/1.1748524, 2005.
- Becker, K. H., Kurtenbach, R., Schmidt, F., and Wiesen, P.: Kinetics of the NCO radical reacting with atoms and selected molecules, *Combust. Flame*, 120, 570–577, doi:10.1016/S0010-2180(99)00108-X, 2000.
- Beckwith, R. C., Wang, T. X., and Margerum, D. W.: Equilibrium and kinetics of bromine hydrolysis, *Inorg. Chem.*, 35, 995–1000, doi:10.1021/IC950909W, 1996.
- Bedjanian, Y., Laverdet, G., and Le Bras, G.: Low-pressure study of the reaction of Cl atoms with isoprene, *J. Phys. Chem. A*, 102, 953–959, doi:10.1021/JP973336C, 1998.
- Behnke, W., Scheer, V., and Zetzsch, C.: Production of BrNO<sub>2</sub>, Br<sub>2</sub> and ClNO<sub>2</sub> from the reaction between sea spray aerosol and N<sub>2</sub>O<sub>5</sub>, *J. Aerosol Sci.*, 25, S277–S278, doi:10.1016/0021-8502(94)90369-7, 1994.
- Behnke, W., George, C., Scheer, V., and Zetzsch, C.: Production and decay of ClNO<sub>2</sub> from the reaction of gaseous N<sub>2</sub>O<sub>5</sub> with NaCl solution: Bulk and aerosol experiments, *J. Geophys. Res.*, 102D, 3795–3804, doi:10.1029/96JD03057, 1997.
- Bell, R. P. and Evans, P. G.: Kinetics of the dehydration of methylene glycol in aqueous solution, *Proc. R. Soc. Lond. A*, 291, 297–323, doi:10.1098/RSPA.1966.0097, 1966.
- Bertram, T. H. and Thornton, J. A.: Toward a general parameterization of N<sub>2</sub>O<sub>5</sub> reactivity on aqueous particles: the competing effects of particle liquid water, nitrate and chloride, *Atmos. Chem. Phys.*, 9, 8351–8363, doi:10.5194/ACP-9-8351-2009, 2009.
- Betterton, E. A. and Hoffmann, M. R.: Oxidation of aqueous SO<sub>2</sub> by peroxy monosulfate, *J. Phys. Chem.*, 92, 5962–5965, doi:10.1021/J100332A025, 1988.
- Beyersdorf, A. J., Blake, D. R., Swanson, A., Meinardi, S., Rowland, F. S., and Davis, D.: Abundances and variability of tropospheric volatile organic compounds at the South Pole and other Antarctic locations, *Atmos. Environ.*, 44, 4565–4574, doi:10.1016/J.ATMOSENV.2010.08.025, 2010.
- Bichsel, Y. and von Gunten, U.: Oxidation of iodide and hypiodous acid in the disinfection of natural waters, *Environ. Sci. Technol.*, 33, 4040–4045, doi:10.1021/ES990336C, 1999.
- Birdsall, A. W., Andreoni, J. F., and Elrod, M. J.: Investigation of the role of bicyclic peroxy radicals in the oxidation mechanism of toluene, *J. Phys. Chem. A*, 114, 10655–10663, doi:10.1021/JP105467E, 2010.
- Bjergbakke, E., Navartnam, S., Parsons, B. J., and Swallow, A. J.: Reaction between HO<sub>2</sub>· and chlorine in aqueous solution, *J. Am. Chem. Soc.*, 103, 5926–5928, doi:10.1021/JA00409A059, 1981.
- Bossolasco, A., Faragó, E. P., Schoemaeker, C., and Fittschen, C.: Rate constant of the reaction between CH<sub>3</sub>O<sub>2</sub> and OH radicals, *Chem. Phys. Lett.*, 593, 7–13, doi:10.1016/J.CPLETT.2013.12.052, 2014.
- Boyce, S. D. and Hoffmann, M. R.: Kinetics and mechanism of the formation of hydroxymethanesulfonic acid at low pH, *J. Phys. Chem.*, 88, 4740–4746, doi:10.1021/J150664A059, 1984.
- Brand, C. and van Eldik, R.: Transition metal-catalyzed oxidation of sulfur(IV) oxides. Atmospheric relevant processes and mechanisms, *Chem. Rev.*, 95, 119–190, doi:10.1021/CR00033A006, 1995.
- Buras, Z. J., Elsamra, R. M. I., and Green, W. H.: Direct determination of the simplest Criegee intermediate (CH<sub>2</sub>OO) self reaction rate, *J. Phys. Chem. Lett.*, 5, 2224–2228, doi:10.1021/JZ5008406, 2014.
- Burkholder, J. B., Sander, S. P., Abbatt, J., Barker, J. R., Huie, R. E., Kolb, C. E., Kurylo, M. J., Orkin, V. L., Wilmouth, D. M., and Wine, P. H.: Chemical Kinetics and Photochemical Data for Use in Atmospheric Studies, Evaluation No. 18, JPL Publication 15-10, Jet Propulsion Laboratory, Pasadena, <http://jpldataeval.jpl.nasa.gov>, 2015.
- Burkholder, J. B., Sander, S. P., Abbatt, J., Barker, J. R., Cappa, C., Crounse, J. D., Dibble, T. S., Huie, R. E., Kolb, C. E., Kurylo, M. J., Orkin, V. L., Percival, C. J., Wilmouth, D. M., and Wine, P. H.: Chemical Kinetics and Photochemical Data for Use in Atmospheric Studies, Evaluation No. 19, JPL Publication 19-5, Jet Propulsion Laboratory, Pasadena, <https://jpldataeval.jpl.nasa.gov>, 2019.
- Butkovskaya, N., Kukui, A., and Le Bras, G.: Pressure and temperature dependence of ethyl nitrate formation in the C<sub>2</sub>H<sub>5</sub>O<sub>2</sub> + NO reaction, *J. Phys. Chem. A*, 114, 956–964, doi:10.1021/JP910003A, 2010.
- Butkovskaya, N., Kukui, A., and Le Bras, G.: Pressure and temperature dependence of methyl nitrate formation in the CH<sub>3</sub>O<sub>2</sub> + NO reaction, *J. Phys. Chem. A*, 116, 5972–5980, doi:10.1021/JP210710D, 2012.
- Buxton, G. V., Greenstock, C. L., Helman, W. P., and Ross, A. B.: Critical review of rate constants for reactions of hydrated electrons, hydrogen atoms and hydroxyl radicals (·OH/·O<sup>-</sup>) in aqueous solution, *J. Phys. Chem. Ref. Data*, 17, 513–886, doi:10.1063/1.555805, 1988.

- Buxton, G. V., Salmon, G. A., and Wood, N. D.: A pulse radiolysis study of the chemistry of oxysulphur radicals in aqueous solution, in: *Physico-Chemical Behaviour of Atmospheric Pollutants*, edited by Restelli, G. and Angeletti, G., pp. 245–250, Springer, doi:10.1007/978-94-009-0567-2, 1990.
- Buxton, G. V., McGowan, S., Salmon, G. A., Williams, J. E., and Wood, N. D.: A study of the spectra and reactivity of oxysulphur-radical anions involved in the chain oxidation of S(IV): A pulse and  $\gamma$ -radiolysis study, *Atmos. Environ.*, 30, 2483–2493, doi:10.1016/1352-2310(95)00473-4, 1996.
- Buxton, G. V., Malone, T. N., and Salmon, G. A.: Oxidation of glyoxal initiated by OH in oxygenated aqueous solution, *J. Chem. Soc. Faraday Trans.*, 93, 2889–2891, doi:10.1039/A701468F, 1997.
- Buxton, G. V., Bydder, M., and Salmon, G. A.: The reactivity of chlorine atoms in aqueous solution: Part II. The equilibrium  $\text{SO}_4^{\cdot-} + \text{Cl}^- \rightleftharpoons \text{Cl}^\cdot + \text{SO}_4^{2-}$ , *Phys. Chem. Chem. Phys.*, 1, 269–273, doi:10.1039/A807808D, 1999a.
- Buxton, G. V., Salmon, G. A., and Wang, J. Q.: The equilibrium  $\text{NO}_3 + \text{Cl}^- \rightleftharpoons \text{NO}_3^- + \text{Cl}^\cdot$ : A laser flash photolysis and pulse radiolysis study of the reactivity of  $\text{NO}_3$  with chloride ion in aqueous solution, *Phys. Chem. Chem. Phys.*, 1, 3589–3593, doi:10.1039/A903286J, 1999b.
- Canosa-Mas, C. E., King, M. D., Lopez, R., Percival, C. J., Wayne, R. P., Shallcross, D. E., Pyle, J. A., and Daele, V.: Is the reaction between  $\text{CH}_3(\text{O})\text{O}_2$  and  $\text{NO}_3$  important in the night-time troposphere?, *J. Chem. Soc. Faraday Trans.*, 92, 2211–2222, doi:10.1039/FT9969202211, 1996.
- Capouet, M., Müller, J.-F., Ceulemans, K., Compernelle, S., Vereecken, L., and Peeters, J.: Modeling aerosol formation in alpha-pinene photo-oxidation experiments, *J. Geophys. Res.*, 113D, doi:10.1029/2007JD008995, 2008.
- Chai, J., Hu, H., Dibble, T. S., Tyndall, G. S., and Orlando, J. J.: Rate constants and kinetic isotope effects for methoxy radical reacting with  $\text{NO}_2$  and  $\text{O}_2$ , *J. Phys. Chem. A*, 118, 3552–3563, doi:10.1021/JP501205D, 2014.
- Chameides, W. L.: The photochemistry of a remote marine stratiform cloud, *J. Geophys. Res.*, 89D, 4739–4755, doi:10.1029/JD089ID03P04739, 1984.
- Chao, W., Hsieh, J.-T., Chang, C.-H., and Lin, J. J.-M.: Direct kinetic measurement of the reaction of the simplest Criegee intermediate with water vapor, *Science*, 347, 751–754, doi:10.1126/SCIENCE.1261549, 2015.
- Chen, J., Wenger, J. C., and Venables, D. S.: Near-ultraviolet absorption cross sections of nitrophenols and their potential influence on tropospheric oxidation capacity, *J. Phys. Chem. A*, 115, 12 235–12 242, doi:10.1021/JP206929R, 2011.
- Chin, M. and Wine, P. H.: A temperature-dependent competitive kinetics study of the aqueous-phase reactions of OH radicals with formate, formic acid, acetate, acetic acid, and hydrated formaldehyde, in: *Aquatic and Surface Photochemistry*, edited by Helz, G. R., Zepp, R. G., and Crosby, D. G., pp. 85–96, A. F. Lewis, NY, 1994.
- Christensen, H. and Sehested, K.: Pulse radiolysis at high temperatures and high pressures, *Radiat. Phys. Chem.*, 18, 723–231, doi:10.1016/0146-5724(81)90195-3, 1981.
- Christensen, H. and Sehested, K.:  $\text{HO}_2$  and  $\text{O}_2^-$  radicals at elevated temperatures, *J. Phys. Chem.*, 92, 3007–3011, doi:10.1021/J100321A060, 1988.
- Christensen, H., Sehested, K., and Corfitzen, H.: Reactions of hydroxyl radicals with hydrogen peroxide at ambient and elevated temperatures, *J. Phys. Chem.*, 86, 1588–1590, doi:10.1021/J100206A023, 1982.
- Clifton, C. L. and Huie, R. E.: Rate constants for hydrogen abstraction reactions of the sulfate radical,  $\text{SO}_4^{\cdot-}$ . Alcohols, *Int. J. Chem. Kinet.*, 21, 677–687, doi:10.1002/KIN.550210807, 1989.
- Clifton, C. L. and Huie, R. E.: Rate constants for some hydrogen abstraction reactions of the carbonate radical, *Int. J. Chem. Kinet.*, 25, 199–203, doi:10.1002/KIN.550250308, 1993.
- Clubb, A. E., Jordan, M. J. T., Kable, S. H., and Osborn, D. L.: Phototautomerization of acetaldehyde to vinyl alcohol: a primary process in UV-irradiated acetaldehyde from 295 to 335 nm, *J. Phys. Chem. Lett.*, 3, 3522–3526, doi:10.1021/JZ301701X, 2012.
- Clyne, M. A. A. and Cruse, H. W.: Atomic resonance fluorescence spectrometry for the rate constants of rapid bimolecular reactions. Part 2. Reactions  $\text{Cl} + \text{BrCl}$ ,  $\text{Cl} + \text{Br}_2$ ,  $\text{Cl} + \text{ICl}$ ,  $\text{Br} + \text{IBr}$ ,  $\text{Br} + \text{ICl}$ , *J. Chem. Soc. Faraday Trans. 2*, 68, 1377–1387, doi:10.1039/F29726801377, 1972.
- Conn, J. B., Kistiakowsky, G. B., Roberts, R. M., and Smith, E. A.: Heats of organic reactions. XIII. Heats of hydrolysis of some acid anhydrides, *J. Am. Chem. Soc.*, 64, 1747–1752, doi:10.1021/JA01260A001, 1942.
- da Silva, G.: Carboxylic acid catalyzed keto-enol tautomerizations in the gas phase, *Angew. Chem.*, 122, 7685–7687, doi:10.1002/ANGE.201003530, 2010.

- Damschen, D. E. and Martin, L. R.: Aqueous aerosol oxidation of nitrous acid by  $O_2$ ,  $O_3$  and  $H_2O_2$ , *Atmos. Environ.*, 17, 2005–2011, doi:10.1016/0004-6981(83)90357-8, 1983.
- Davis, D., Chen, G., Kasibhatla, P., Jefferson, A., Tanner, D., Eisele, F., Lenschow, D., Neff, W., and Berresheim, H.: DMS oxidation in the Antarctic marine boundary layer: Comparison of model simulations and field observations of DMS, DMSO,  $DMSO_2$ ,  $H_2SO_4(g)$ , MSA(g), and MSA(p), *J. Geophys. Res.*, 103D, 1657–1678, doi:10.1029/97JD03452, 1998.
- Davis, Jr., W. and de Bruin, H. J.: New activity coefficients of 0–100 per cent aqueous nitric acid, *J. Inorg. Nucl. Chem.*, 26, 1069–1083, doi:10.1016/0022-1902(64)80268-2, 1964.
- De Filippis, P., Scarsella, M., and Verdone, N.: Peroxyformic acid formation: a kinetic study, *Ind. Eng. Chem. Res.*, 48, 1372–1375, doi:10.1021/IE801163J, 2009.
- de Laat, J. and Le, T. G.: Effects of chloride ions on the iron(III)-catalyzed decomposition of hydrogen peroxide and on the efficiency of the Fenton-like oxidation process, *Appl. Catal. B: Environ.*, 66, 137–146, doi:10.1016/J.APCATB.2006.03.008, 2006.
- Deister, U. and Warneck, P.: Photooxidation of  $SO_3^{2-}$  in aqueous solution, *J. Phys. Chem.*, 94, 2191–2198, doi:10.1021/J100368A084, 1990.
- Dickson, A. G. and Millero, F. J.: A comparison of the equilibrium constants for the dissociation of carbonic acid in seawater media, *Deep-Sea Res. A*, 34, 1733–1743, 1987.
- Dolson, D. A. and Leone, S. R.: A reinvestigation of the laser-initiated chlorine/hydrogen bromide chain reaction: absolute rate constants and the  $v = 2/v = 1$  ratio from chlorine atom + hydrogen bromide  $\rightarrow$  hydrogen chloride(v) + bromine atom, *J. Phys. Chem.*, 91, 3543–3550, doi:10.1021/J100297A016, 1987.
- Doussin, J.-F. and Monod, A.: Structure-activity relationship for the estimation of OH-oxidation rate constants of carbonyl compounds in the aqueous phase, *Atmos. Chem. Phys.*, 13, 11 625–11 641, doi:10.5194/ACP-13-11625-2013, 2013.
- Dulitz, K., Amedro, D., Dillon, T. J., Pozzer, A., and Crowley, J. N.: Temperature (208–318 K) and pressure (18–696 Torr) dependent rate coefficients for the reaction between OH and  $HNO_3$ , *Atmos. Chem. Phys.*, 18, 2381–2394, doi:10.5194/ACP-18-2381-2018, 2018.
- Elliot, A. J. and McCracken, D. R.: Effect of temperature on OH reactions and equilibria: a pulse radiolysis study, *Int. J. Radiat. Appl. Instrum. C*, 33, 69–74, doi:10.1016/1359-0197(89)90096-9, 1989.
- Ervens, B. and Volkamer, R.: Glyoxal processing by aerosol multiphase chemistry: towards a kinetic modeling framework of secondary organic aerosol formation in aqueous particles, *Atmos. Chem. Phys.*, 10, 8219–8244, doi:10.5194/ACP-10-8219-2010, 2010.
- Ervens, B., Gligorovski, S., and Herrmann, H.: Temperature-dependent rate constants for hydroxyl radical reactions with organic compounds in aqueous solutions, *Phys. Chem. Chem. Phys.*, 5, 1811–1824, doi:10.1039/B300072A, 2003.
- Exner, M., Herrmann, H., and Zellner, R.: Laser-based studies of reactions of the nitrate radical in aqueous solution, *Ber. Bunsenges. Phys. Chem.*, 96, 470–477, doi:10.1002/BBPC.19920960347, 1992.
- Exner, M., Herrmann, H., Michel, J. W., and Zellner, R.: Laser pulse initiated measurements of  $NO_3$  reactions with S(IV) and organic compounds in aqueous solutions, in: *Proceedings of EUROTRAC Symposium '92*, edited by Borrell, P. M., Borrell, P., Cvitaš, T., and Seiler, W., pp. 615–618, SPB Academic Publishing bv, The Hague, 1993.
- Exner, M., Herrmann, H., and Zellner, R.: Rate constants for the reactions of the  $NO_3$  radical with  $HCOOH/HCOO^-$  and  $CH_3COOH/CH_3COO^-$  in aqueous solution between 278 and 328 K, *J. Atmos. Chem.*, 18, 359–378, doi:10.1007/BF00712451, 1994.
- Feierabend, K. J., Zhu, L., Talukdar, R. K., and Burkholder, J. B.: Rate coefficients for the OH +  $HC(O)C(O)H$  (glyoxal) reaction between 210 and 390 K, *J. Phys. Chem. A*, 112, 73–82, doi:10.1021/JP0768571, 2008.
- Finkbeiner, M., Crowley, J. N., Horie, O., Müller, R., Moortgat, G. K., and Crutzen, P. J.: Reaction between  $HO_2$  and ClO: Product formation between 210 and 300 K, *J. Phys. Chem.*, 99, 16 264–16 275, doi:10.1021/J100044A011, 1995.
- Fisher, J. R. and Barnes, H. L.: The ion-product constant of water to 350°, *J. Phys. Chem.*, 76, 90–99, doi:10.1021/J100645A016, 1972.
- Fisher, M. M. and Hamill, W. H.: Electronic processes in pulse-irradiated aqueous and alcoholic systems, *J. Phys. Chem.*, 77, 171–177, doi:10.1021/J100621A006, 1973.
- Flocke, F., Atlas, E., Madronich, S., Schauffler, S. M., Aikin, K., Margitan, J. J., and Bui, T. P.: Observations of methyl nitrate in the lower stratosphere during STRAT: implications for its gas phase production mechanisms, *Geophys. Res. Lett.*, 25, 1891–1894, doi:10.1029/98GL01417, 1998.

- Fogelman, K. D., Walker, D. M., and Margerum, D. W.: Non-metal redox kinetics: Hypochlorite and hypochlorous acid reactions with sulfite, *Inorg. Chem.*, 28, 986–993, doi:10.1021/IC00305A002, 1989.
- Fortnum, D. H., Battaglia, C. J., Cohen, S. R., and Edwards, J. O.: The kinetics of the oxidation of halide ions by monosubstituted peroxides, *J. Am. Chem. Soc.*, 82, 778–782, doi:10.1021/JA01489A004, 1960.
- Francisco-Marquez, M., Alvarez-Idaboy, J. R., Galano, A., and Vivier-Bunge, A.: Theoretical study of the initial reaction between OH and isoprene in tropospheric conditions, *Phys. Chem. Chem. Phys.*, 5, 1392–1399, doi:10.1039/B211185C, 2003.
- Gaillard de Sémainville, P., Hoffmann, D., George, C., and Herrmann, H.: Study of nitrate radical ( $\text{NO}_3$ ) reactions with carbonyls and acids in aqueous solution as a function of temperature, *Phys. Chem. Chem. Phys.*, 9, 958–968, doi:10.1039/B613956F, 2007.
- Ganzeveld, L., Klemm, O., Rappenglück, B., and Valverde-Canossa, J.: Evaluation of meteorological parameters over a coniferous forest in a single-column chemistry-climate model, *Atmos. Environ.*, 40, S21–S27, doi:10.1016/J.ATMOSENV.2006.01.061, 2006.
- George, C., El Rassy, H., and Chovelon, J.-M.: Reactivity of selected volatile organic compounds (VOCs) toward the sulfate radical ( $\text{SO}_4^-$ ), *Int. J. Chem. Kinet.*, 33, 539–547, doi:10.1002/KIN.1049, 2001.
- Gilbert, B. C. and Stell, J. K.: Mechanisms of peroxide decomposition. An ESR study of the reactions of the peroxomonosulphate anion ( $\text{HOOSO}_3^-$ ) with  $\text{Ti(III)}$ ,  $\text{Fe(II)}$ , and  $\alpha$ -oxygen-substituted radicals, *J. Chem. Soc. Perkin Trans. 2*, pp. 1281–1288, doi:10.1039/P29900001281, 1990.
- Gill, K. J. and Hites, R. A.: Rate constants for the gas-phase reactions of the hydroxyl radical with isoprene,  $\alpha$ - and  $\beta$ -pinene, and limonene as a function of temperature, *J. Phys. Chem. A*, 106, 2538–2544, doi:10.1021/JP013532Q, 2002.
- Gligorovski, S., Rouse, D., George, C. H., and Herrmann, H.: Rate constants for the OH reactions with oxygenated organic compounds in aqueous solution, *Int. J. Chem. Kinet.*, 41, 309–326, doi:10.1002/KIN.20405, 2009.
- Glowacki, D. R., Lockhart, J., Blitz, M. A., Klippenstein, S. J., Pilling, M. J., Robertson, S. H., and Seakins, P. W.: Interception of excited vibrational quantum states by  $\text{O}_2$  in atmospheric association reactions, *Science*, 337, 1066–1069, doi:10.1126/SCIENCE.1224106, 2012.
- Green, M., Yarwood, G., and Niki, H.: FTIR study of the Cl-atom initiated oxidation of methylglyoxal, *Int. J. Chem. Kinet.*, 22, 689–699, doi:10.1002/KIN.550220705, 1990.
- Grenfell, J. L., Lehmann, R., Mieth, P., Langematz, U., and Steil, B.: Chemical reaction pathways affecting stratospheric and mesospheric ozone, *J. Geophys. Res.*, 111D, doi:10.1029/2004JD005713, 2006.
- Grgić, I., Podkrajšek, B., Barzaghi, P., and Herrmann, H.: Scavenging of  $\text{SO}_4^-$  radical anions by mono- and dicarboxylic acids in the Mn(II)-catalyzed S(IV) oxidation in aqueous solution, *Atmos. Environ.*, 41, 9187–9194, doi:10.1016/J.ATMOSENV.2007.07.051, 2007.
- Grigorev, A. E., Makarov, I. E., and Pikaev, A. K.: Formation of  $\text{Cl}_2^-$  in the bulk solution during the radiolysis of concentrated aqueous solutions of chlorides, *High Energy Chem.*, 21, 99–102, <https://kinetics.nist.gov/solution/Detail?id=1987GRI/MAK99-102:2>, 1987.
- Groß, C. B. M., Dillon, T. J., Schuster, G., Lelieveld, J., and Crowley, J. N.: Direct kinetic study of OH and  $\text{O}_3$  formation in the reaction of  $\text{CH}_3\text{C}(\text{O})\text{O}_2$  with  $\text{HO}_2$ , *J. Phys. Chem. A*, 1, 974–985, doi:10.1021/JP412380Z, 2014.
- Gruzdev, A. N., Elokhov, A. S., Makarov, O. V., and Mokhov, I. I.: Some recent results of Russian measurements of surface ozone in Antarctica. A meteorological interpretation, *Tellus*, 45B, 99–105, doi:10.3402/TELLUSB.V45I2.15584, 1993.
- Haag, W. R. and Hoigné, J.: Ozonation of bromide-containing waters: Kinetics of formation of hypobromous acid and bromate, *Environ. Sci. Technol.*, 17, 261–267, doi:10.1021/ES00111A004, 1983.
- Hahnenstein, I., Albert, M., Hasse, H., Kreiter, C. G., and Maurer, G.: NMR spectroscopic and densimetric study of reaction kinetics of formaldehyde polymer formation in water, deuterium oxide, and methanol, *Ind. Eng. Chem. Res.*, 34, 440–450, doi:10.1021/IE00041A003, 1995.
- Hatakeyama, S., Honda, S., and Akimoto, H.: Rate constants and mechanism for reactions of ketenes with OH radicals in air at  $299 \pm 2$  K, *Bull. Chem. Soc. Jpn.*, 58, 2157–2162, doi:10.1246/BCSJ.58.2157, 1985.
- Heal, M. R., Harrison, M. A. J., and Cape, J. N.: Aqueous-phase nitration of phenol by  $\text{N}_2\text{O}_5$  and  $\text{ClNO}_2$ , *Atmos. Environ.*, 41, 3515–3520, doi:10.1016/J.ATMOSENV.2007.02.003, 2007.
- Hermans, I., Müller, J.-F., Nguyen, T. L., Jacobs, P. A., and Peeters, J.: Kinetics of  $\alpha$ -hydroxy-alkylperoxyl radicals in oxidation processes.  $\text{HO}_2$ -initiated oxidation of ketones/aldehydes near the tropopause,

- J. Phys. Chem. A, 109, 4303–4311, doi:10.1021/JP044080V, 2005.
- Herrmann, H. and Zellner, R.: Reactions of  $\text{NO}_3$ -radicals in aqueous solution, in: *The Chemistry of Free Radicals: N-Centered Radicals*, edited by Alfassi, Z. B., pp. 291–343, John Wiley, New York, NY, 1998.
- Herrmann, H., Exner, M., and Zellner, R.: Reactivity trends in reactions of the nitrate radical ( $\text{NO}_3$ ) with inorganic and organic cloudwater constituents, *Geochim. Cosmochim. Acta*, 58, 3239–3244, doi:10.1016/0016-7037(94)90051-5, 1994.
- Herrmann, H., Reese, A., and Zellner, R.: Time resolved UV/VIS diode array absorption spectroscopy of  $\text{SO}_x^-$  ( $x=3, 4, 5$ ) radical anions in aqueous solution, *J. Mol. Struct.*, 348, 183–186, doi:10.1016/0022-2860(95)08619-7, 1995.
- Herrmann, H., Ervens, B., Nowacki, P., Wolke, R., and Zellner, R.: A chemical aqueous phase radical mechanism for tropospheric chemistry, *Chemosphere*, 38, 1223–1232, doi:10.1016/S0045-6535(98)00520-7, 1999a.
- Herrmann, H., Reese, A., Ervens, B., Wickett, F., and Zellner, R.: Laboratory and modelling studies of tropospheric multiphase conversions involving some  $\text{C}_1$  and  $\text{C}_2$  peroxy radicals, *Phys. Chem. Earth B*, 24, 287–290, doi:10.1016/S1464-1909(98)00052-5, 1999b.
- Herrmann, H., Ervens, B., Jacobi, H.-W., Wolke, R., Nowacki, P., and Zellner, R.: CAPRAM2.3: A chemical aqueous phase radical mechanism for tropospheric chemistry, *J. Atmos. Chem.*, 36, 231–284, doi:10.1023/A:1006318622743, 2000.
- Hislop, K. A. and Bolton, J. R.: The photochemical generation of hydroxyl radicals in the UV-vis/ferrioxalate/ $\text{H}_2\text{O}_2$  system, *Environ. Sci. Technol.*, 33, 3119–3126, doi:10.1021/ES9810134, 1999.
- Hoffmann, D., Weigert, B., Barzaghi, P., and Herrmann, H.: Reactivity of poly-alcohols towards OH,  $\text{NO}_3$  and  $\text{SO}_4^-$  in aqueous solution, *Phys. Chem. Chem. Phys.*, 11, 9351–9363, doi:10.1039/B908459B, 2009.
- Hoffmann, M. R.: On the kinetics and mechanism of oxidation of aquated sulfur dioxide by ozone, *Atmos. Environ.*, 20, 1145–1154, doi:10.1016/0004-6981(86)90147-2, 1986.
- Hoigné, J. and Bader, H.: Rate constants of reactions of ozone with organic and inorganic compounds in water-I: Non-dissociating organic compounds, *Wat. Res.*, 17, 173–183, doi:10.1016/0043-1354(83)90098-2, 1983.
- Hoigné, J., Bader, H., Haag, W. R., and Staehelin, J.: Rate constants of reactions of ozone with organic and inorganic compounds in water – III Inorganic compounds and radicals, *Wat. Res.*, 19, 993–1004, doi:10.1016/0043-1354(85)90368-9, 1985.
- Huie, R. E. and Clifton, C. L.: Temperature dependence of the rate constants for reactions of the sulfate radical,  $\text{SO}_4^-$ , with anions, *J. Phys. Chem.*, 94, 8561–8567, doi:10.1021/J100386A015, 1990.
- Huie, R. E. and Clifton, C. L.: Kinetics of the self-reaction of hydroxymethylperoxy radicals, *Chem. Phys. Lett.*, 205, 163–167, doi:10.1016/0009-2614(93)89222-4, 1993.
- Huie, R. E. and Neta, P.: Rate constants for some oxidations of S(IV) by radicals in aqueous solutions, *Atmos. Environ.*, 21, 1743–1747, doi:10.1016/0004-6981(87)90113-2, 1987.
- Hynes, A. J. and Wine, P. H.: The atmospheric chemistry of dimethylsulfoxide (DMSO) kinetics and mechanism of the OH + DMSO reaction, *J. Atmos. Chem.*, 24, 23–37, doi:10.1007/BF00053821, 1996.
- Ingham, T., Bauer, D., Sander, R., Crutzen, P. J., and Crowley, J. N.: Kinetics and products of the reactions  $\text{BrO} + \text{DMS}$  and  $\text{Br} + \text{DMS}$  at 298 K, *J. Phys. Chem. A*, 103, 7199–7209, doi:10.1021/JP9905979, 1999.
- Iraci, L. T., Riffel, B. G., Robinson, C. B., Michelsen, R. R., and Stephenson, R. M.: The acid catalyzed nitration of methanol: formation of methyl nitrate via aerosol chemistry, *J. Atmos. Chem.*, 58, 253–266, doi:10.1007/S10874-007-9091-9, 2007.
- Jacob, D. J.: Chemistry of OH in remote clouds and its role in the production of formic acid and peroxy-monosulfate, *J. Geophys. Res.*, 91D, 9807–9826, doi:10.1029/JD091ID09P09807, 1986.
- Jacobi, H.-W.: Kinetische Untersuchungen und Modellrechnungen zur troposphärischen Chemie von Radikalanionen und Ozon in wässriger Phase, Ph.D. thesis, Universität GH Essen, Germany, 1996.
- Jacobi, H.-W., Herrmann, H., and Zellner, R.: Kinetic investigation of the  $\text{Cl}_2^-$  radical in the aqueous phase, in: *Air Pollution Research Report 57: Homogeneous and heterogeneous chemical Processes in the Troposphere*, edited by Mirabel, P., pp. 172–176, Office for official Publications of the European Communities, Luxembourg, 1996.
- Jacobsen, F., Holcman, J., and Sehested, K.: Activation parameters of ferryl ion reactions in aqueous acid solutions, *Int. J. Chem. Kinet.*, 29,

- 17–24, doi:10.1002/(SICI)1097-4601(1997)29:1<17::AID-KIN3>3.0.CO;2-O, 1997.
- Jacobsen, F., Holcman, J., and Sehested, K.: Reactions of the ferryl ion with some compounds found in cloud water, *Int. J. Chem. Kinet.*, 30, 215–221, doi:10.1002/(SICI)1097-4601(1998)30:3<215::AID-KIN7>3.0.CO;2-V, 1998.
- Jagiella, S. and Zabel, F.: Reaction of phenylperoxy radicals with NO<sub>2</sub> at 298 K, *Phys. Chem. Chem. Phys.*, 9, 5036–5051, doi:10.1039/B705193J, 2007.
- Jayson, G. G., Parsons, B. J., and Swallow, A. J.: Some simple, highly reactive, inorganic chlorine derivatives in aqueous solution, *J. Chem. Soc. Faraday Trans. 1*, 69, 1597–1607, doi:10.1039/F19736901597, 1973.
- Jefferson, A., Nicovich, J. M., and Wine, P. H.: Temperature-dependent kinetics studies of the reactions  $\text{Br}(^2\text{P}_{3/2}) + \text{CH}_3\text{SCH}_3 \leftrightarrow \text{CH}_3\text{SCH}_2 + \text{HBr}$ . Heat of formation of the CH<sub>3</sub>SCH<sub>2</sub> radical, *J. Phys. Chem.*, 98, 7128–7135, doi:10.1021/J100080A006, 1994.
- Jenkin, M., Saunders, S. M., and Pilling, M. J.: The tropospheric degradation of volatile organic compounds: A protocol for mechanism development, *Atmos. Environ.*, 31, 81–104, doi:10.1016/S1352-2310(96)00105-7, 1997.
- Jenkin, M. E., Young, J. C., and Rickard, A. R.: The MCM v3.3.1 degradation scheme for isoprene, *Atmos. Chem. Phys.*, 15, 11 433–11 459, doi:10.5194/ACP-15-11433-2015, 2015.
- Jiang, P.-Y., Katsumura, Y., Nagaishi, R., Domae, M., Ishikawa, K., Ishigure, K., and Yoshida, Y.: Pulse radiolysis study of concentrated sulfuric acid solutions. Formation mechanism, yield and reactivity of sulfate radicals, *J. Chem. Soc. Faraday Trans.*, 88, 1653–1658, doi:10.1039/FT9928801653, 1992.
- Keller-Rudek, H., Koschel, D., Merlet, P., Ohms-Bredemann, U., Wagner, J., and Wietelmann, A.: *Gmelin Handbook of Inorganic and Organometallic Chemistry*, 8th Edition, Br, Bromine, Supplement Volume B2, Compounds with Oxygen and Nitrogen, Springer Verlag, Berlin, 1992.
- Kelley, C. M. and Tartar, H. V.: On the system: bromine-water, *J. Am. Chem. Soc.*, 78, 5752–5756, doi:10.1021/JA01603A010, 1956.
- Kirchner, F., Mayer-Figge, A., Zabel, F., and Becker, K. H.: Thermal stability of peroxy-nitrates, *Int. J. Chem. Kinet.*, 31, 127–144, doi:10.1002/(SICI)1097-4601(1999)31:2<127::AID-KIN6>3.0.CO;2-L, 1999.
- Kleinböhl, A., Toon, G. C., Sen, B., Blavier, J.-F. L., Weisenstein, D. K., Strekowski, R. S., Nicovich, J. M., Wine, P. H., and Wennberg, P. O.: On the stratospheric chemistry of hydrogen cyanide, *Geophys. Res. Lett.*, 33, doi:10.1029/2006GL026015, 2006.
- Knipping, E. M., Lakin, M. J., Foster, K. L., Jungwirth, P., Tobias, D. J., Gerber, R. B., Dabdub, D., and Finlayson-Pitts, B. J.: Experiments and simulations of ion-enhanced interfacial chemistry on aqueous NaCl aerosols, *Science*, 288, 301–306, doi:10.1126/SCIENCE.288.5464.301, 2000.
- Kohlmann, J.-P. and Poppe, D.: The tropospheric gas-phase degradation of NH<sub>3</sub> and its impact on the formation of N<sub>2</sub>O and NO<sub>x</sub>, *J. Atmos. Chem.*, 32, 397–415, doi:10.1023/A:1006162910279, 1999.
- Kondo, O. and Benson, S. W.: Kinetics and equilibria in the system  $\text{Br} + \text{CH}_3\text{OOH} \rightleftharpoons \text{HBr} + \text{CH}_3\text{OO}$ . An upper limit for the heat of formation of the methylperoxy radical, *J. Phys. Chem.*, 88, 6675–6680, doi:10.1021/J150670A034, 1984.
- Kumar, K. and Margerum, D. W.: Kinetics and mechanism of general-acid-assisted oxidation of bromide by hypochlorite and hypochlorous acid, *Inorg. Chem.*, 26, 2706–2711, doi:10.1021/IC00263A030, 1987.
- Lax, E.: *Taschenbuch für Chemiker und Physiker*, Springer Verlag, Berlin, 1969.
- Lee, Y.-N. and Schwartz, S. E.: Reaction kinetics of nitrogen dioxide with liquid water at low partial pressure, *J. Phys. Chem.*, 85, 840–848, doi:10.1021/J150607A022, 1981.
- Lewis, T. R., Blitz, M. A., Heard, D. E., and Seakins, P. W.: Direct evidence for a substantive reaction between the Criegee intermediate, CH<sub>2</sub>OO, and the water vapour dimer, *Phys. Chem. Chem. Phys.*, 17, 4859–4863, doi:10.1039/C4CP04750H, 2015.
- Liljegren, J. A. and Stevens, P. S.: Measurements of the kinetics of the reaction of OH radicals with 3-methylfuran at low pressure, *Int. J. Chem. Kinet.*, 45, 787–794, doi:10.1002/KIN.20814, 2013.
- Lind, J. A., Lazrus, A. L., and Kok, G. L.: Aqueous phase oxidation of sulfur(IV) by hydrogen peroxide, methylhydroperoxide, and peroxyacetic acid, *J. Geophys. Res.*, 92D, 4171–4177, doi:10.1029/JD092ID04P04171, 1987.
- Liu, Q. and Margerum, D. W.: Equilibrium and kinetics of bromine chloride hydrolysis, *Environ. Sci. Technol.*, 35, 1127–1133, doi:10.1021/ES001380R, 2001.

- Liu, Y., Pimentel, A. S., Antoku, Y., Giles, B. J., and Barker, J. R.: Temperature-dependent rate and equilibrium constants for  $\text{Br} \cdot (\text{aq}) + \text{Br}^- (\text{aq}) \rightleftharpoons \text{Br}_2^- \cdot (\text{aq})$ , *J. Phys. Chem. A*, 106, 11 075–11 082, doi:10.1021/JP0255536, 2002.
- Lockhart, J., Blitz, M., Heard, D., Seakins, P., and Shannon, R.: Kinetic study of the OH + glyoxal reaction: experimental evidence and quantification of direct OH recycling, *J. Phys. Chem. A*, 117, 11 027–11 037, doi:10.1021/JP4076806, 2013.
- Lockwood, A. L., Shepson, P. B., Fiddler, M. N., and Alaghmand, M.: Isoprene nitrates: preparation, separation, identification, yields, and atmospheric chemistry, *Atmos. Chem. Phys.*, 10, 6169–6178, doi:10.5194/ACP-10-6169-2010, 2010.
- Løgager, T., Holcman, J., Sehested, K., and Pedersen, T.: Oxidation of ferrous ions by ozone in acidic solutions, *Inorg. Chem.*, 31, 3523–3529, doi:10.1021/IC00043A009, 1992.
- Løgager, T., Sehested, K., and Holcman, J.: Rate constants of the equilibrium reactions  $\text{SO}_4 + \text{HNO}_3 \rightleftharpoons \text{HSO}_4^- + \text{NO}_3$  and  $\text{SO}_4 + \text{NO}_3 \rightleftharpoons \text{SO}_4^{2-} + \text{NO}_3$ , *Radiat. Phys. Chem.*, 41, 539–543, doi:10.1016/0969-806X(93)90017-O, 1993.
- Long, C. A. and Bielski, B. H. J.: Rate of reaction of superoxide radical with chloride-containing species, *J. Phys. Chem.*, 84, 555–557, doi:10.1021/J100442A023, 1980.
- Manion, J. A., Huie, R. E., Levin, R. D., Burgess, Jr., D. R., Orkin, V. L., Tsang, W., McGivern, W. S., Hudgens, J. W., Knyazev, V. D., Atkinson, D. B., Chai, E., Tereza, A. M., Lin, C.-Y., Allison, T. C., Mallard, W. G., Westley, F., Herron, J. T., Hampson, R. F., and Frizzell, D. H.: NIST Chemical Kinetics Database, NIST Standard Reference Database 17 (Web Version), <https://kinetics.nist.gov>, 2015.
- Marsh, A. R. W. and McElroy, W. J.: The dissociation constant and Henry’s law constant of HCl in aqueous solution, *Atmos. Environ.*, 19, 1075–1080, doi:10.1016/0004-6981(85)90192-1, 1985.
- Martell, A. E.: Volume 3: Other organic ligands, in: *Critical Stability Constants*, Springer, doi:10.1007/978-1-4757-1568-2, 1977.
- Martin, L. R. and Damschen, D. E.: Aqueous oxidation of sulfur dioxide by hydrogen peroxide at low pH, *Atmos. Environ.*, 15, 1615–1621, doi:10.1016/0004-6981(81)90146-3, 1981.
- Matthew, B. M., George, I., and Anastasio, C.: Hydroperoxyl radical ( $\text{HO}_2 \cdot$ ) oxidizes dibromide radical anion ( $\cdot\text{Br}_2^-$ ) to bromine ( $\text{Br}_2$ ) in aqueous solution: Implications for the formation of  $\text{Br}_2$  in the marine boundary layer, *Geophys. Res. Lett.*, 30, doi:10.1029/2003GL018572, 2003.
- McCabe, D. C., Gierczak, T., Talukdar, R. K., and Ravishankara, A. R.: Kinetics of the reaction  $\text{OH} + \text{CO}$  under atmospheric conditions, *Geophys. Res. Lett.*, 28, 3135–3138, doi:10.1029/2000GL012719, 2001.
- McElroy, W. J. and Waygood, S. J.: Kinetics of the reactions of the  $\text{SO}_4^-$  radical with  $\text{SO}_4^-$ ,  $\text{S}_2\text{O}_8^{2-}$ ,  $\text{H}_2\text{O}$  and  $\text{Fe}^{2+}$ , *J. Chem. Soc. Faraday Trans.*, 86, 2557–2564, doi:10.1039/FT9908602557, 1990.
- Mellouki, A. and Mu, Y.: On the atmospheric degradation of pyruvic acid in the gas phase, *J. Photochem. Photobiol. A: Chem.*, 157, 295–300, doi:10.1016/S1010-6030(03)00070-4, 2003.
- Messaadia, L., Dib, G. E., Ferhati, A., and Chakir, A.: UV-visible spectra and gas-phase rate coefficients for the reaction of 2,3-pentanedione and 2,4-pentanedione with OH radicals, *Chem. Phys. Lett.*, 626, 73–79, doi:10.1016/J.CPLETT.2015.02.032, 2015.
- Monod, A., Poulain, L., Grubert, S., Voisin, D., and Wortham, H.: Kinetics of OH-initiated oxidation of oxygenated organic compounds in the aqueous phase: new rate constants, structure-activity relationships and atmospheric implications, *Atmos. Environ.*, 39, 7667–7688, doi:10.1016/J.ATMOSENV.2005.03.019, 2005.
- Monod, A., Chevallier, E., Durand Jolibois, R., Doussin, J. F., Picquet-Varrault, B., and Carlier, P.: Photooxidation of methylhydroperoxide and ethylhydroperoxide in the aqueous phase under simulated cloud droplet conditions, *Atmos. Environ.*, 41, 2412–2426, doi:10.1016/J.ATMOSENV.2006.10.006, 2007.
- Müller, J.-F., Peeters, J., and Stavrakou, T.: Fast photolysis of carbonyl nitrates from isoprene, *Atmos. Chem. Phys.*, 14, 2497–2508, doi:10.5194/ACP-14-2497-2014, 2014.
- Munger, J. W., Jacob, D. J., Fan, S.-M., Colman, A. S., and Dibb, J. E.: Concentrations and snow-atmosphere fluxes of reactive nitrogen at Summit, Greenland, *J. Geophys. Res.*, 104D, 13 721–13 734, doi:10.1029/1999JD900192, 1999.
- Nakanishi, H., Morita, H., and Nagakura, S.: Electronic structures and spectra of the keto and enol forms of acetylacetone, *Bull. Chem. Soc. Jpn.*, 50, 2255–2261, doi:10.1246/BCSJ.50.2255, 1977.
- Neta, P. and Huie, R. E.: Rate constants for reactions of  $\text{NO}_3$  radicals in aqueous solutions, *J. Phys. Chem.*, 90, 4644–4648, doi:10.1021/J100410A035, 1986.

- Nguyen, T. L., Peeters, J., and Vereecken, L.: Theoretical study of the gas-phase ozonolysis of  $\beta$ -pinene ( $C_{10}H_{16}$ ), *Phys. Chem. Chem. Phys.*, 11, 5643–5656, doi:10.1039/B822984H, 2009.
- Nielsen, O. J., Sidebottom, H. W., Donlon, M., and Treacy, J.: Rate constants for the gas-phase reactions of OH radicals and Cl atoms with  $n$ -alkyl nitrites at atmospheric pressure and 298 K, *Int. J. Chem. Kinet.*, 23, 1095–1109, doi:10.1002/KIN.550231204, 1991.
- Niki, H., Maker, P. D., Savage, C. M., and Breitenbach, L. P.: An FTIR study of the Cl-atom-initiated reaction of glyoxal, *Int. J. Chem. Kinet.*, 17, 547–558, doi:10.1002/KIN.550170507, 1985.
- Niki, H., Maker, P. D., Savage, C. M., and Hurley, M. D.: Fourier transform infrared study of the kinetics and mechanisms for the Cl-atom- and HO-radical-initiated oxidation of glycolaldehyde, *J. Phys. Chem.*, 91, 2174–2178, doi:10.1021/J100292A038, 1987.
- Ogryzlo, E. A., Paltenghi, R., and Bayes, K. D.: The rate of reaction of methyl radicals with ozone, *Int. J. Chem. Kinet.*, 13, 667–675, doi:10.1002/KIN.550130707, 1981.
- Olzmann, M., Kraka, E., Cremer, D., Gutbrod, R., and Andersson, S.: Energetics, kinetics, and product distributions of the reactions of ozone with ethene and 2,3-dimethyl-2-butene, *J. Phys. Chem. A*, 101, 9421–9429, doi:10.1021/JP971663E, 1997.
- Orlando, J. J. and Tyndall, G. S.: Rate coefficients for the thermal decomposition of  $BrONO_2$  and the heat of formation of  $BrONO_2$ , *J. Phys. Chem.*, 100, 19 398–19 405, doi:10.1021/JP9620274, 1996.
- Orlando, J. J. and Tyndall, G. S.: The atmospheric chemistry of the  $HC(O)CO$  radical, *Int. J. Chem. Kinet.*, 33, 149–156, doi:10.1002/1097-4601(200103)33:3<149::AID-KIN1008>3.0.CO;2-1, 2001.
- Orlando, J. J. and Tyndall, G. S.: Laboratory studies of organic peroxy radical chemistry: an overview with emphasis on recent issues of atmospheric significance, *Chem. Soc. Rev.*, 41, 6294–6317, doi:10.1039/C2CS35166H, 2012.
- Orlando, J. J., Tyndall, G. S., Bilde, M., Ferronato, C., Wallington, T. J., Vereecken, L., and Peeters, J.: Laboratory and theoretical study of the oxy radicals in the OH- and Cl-initiated oxidation of ethene, *J. Phys. Chem. A*, 102, 8116–8123, doi:10.1021/JP981937D, 1998.
- Orlando, J. J., Tyndall, G. S., Fracheboud, J. M., Estupinan, E. G., Haberkorn, S., and Zimmer, A.: The rate and mechanism of the gas-phase oxidation of hydroxyacetone, *Atmos. Environ.*, 33, 1621–1629, doi:10.1016/S1352-2310(98)00386-0, 1999a.
- Orlando, J. J., Tyndall, G. S., and Paulson, S. E.: Mechanism of the OH-initiated oxidation of methacrolein, *Geophys. Res. Lett.*, 26, 2191–2194, doi:10.1029/1999GL900453, 1999b.
- Orlando, J. J., Tyndall, G. S., Bertman, S. B., Chen, W., and Burkholder, J. B.: Rate coefficient for the reaction of OH with  $CH_2=C(CH_3)C(O)OONO_2$  (MPAN), *Atmos. Environ.*, 36, 1895–1900, doi:10.1016/S1352-2310(02)00090-0, 2002.
- Ouyang, B., McLeod, M. W., Jones, R. L., and Bloss, W. J.:  $NO_3$  radical production from the reaction between the Criegee intermediate  $CH_2OO$  and  $NO_2$ , *Phys. Chem. Chem. Phys.*, 15, 17 070–17 075, doi:10.1039/C3CP53024H, 2013.
- Paulot, F., Crounse, J. D., Kjaergaard, H. G., Kroll, J. H., Seinfeld, J. H., and Wennberg, P. O.: Isoprene photooxidation: new insights into the production of acids and organic nitrates, *Atmos. Chem. Phys.*, 9, 1479–1501, doi:10.5194/ACP-9-1479-2009, 2009a.
- Paulot, F., Crounse, J. D., Kjaergaard, H. G., Kürten, A., St. Clair, J. M., Seinfeld, J. H., and Wennberg, P. O.: Unexpected epoxide formation in the gas-phase photooxidation of isoprene, *Science*, 325, 730–733, doi:10.1126/SCIENCE.1172910, 2009b.
- Paulot, F., Wunch, D., Crounse, J. D., Toon, G. C., Millet, D. B., DeCarlo, P. F., Vigouroux, C., Deutscher, N. M., González Abad, G., Notholt, J., Warneke, T., Hannigan, J. W., Warneke, C., de Gouw, J. A., Dunlea, E. J., De Mazière, M., Griffith, D. W. T., Bernath, P., Jimenez, J. L., and Wennberg, P. O.: Importance of secondary sources in the atmospheric budgets of formic and acetic acids, *Atmos. Chem. Phys.*, 11, 1989–2013, doi:10.5194/ACP-11-1989-2011, 2011.
- Peeters, J. and Nguyen, T. L.: Unusually fast 1,6-H shifts of enolic hydrogens in peroxy radicals: formation of the first-generation  $C_2$  and  $C_3$  carbonyls in the oxidation of isoprene, *J. Phys. Chem. A*, 116, 6134–6141, doi:10.1021/JP211447Q, 2012.
- Peeters, J., Müller, J.-F., Stavrou, T., and Nguyen, V. S.: Hydroxyl radical recycling in isoprene oxidation driven by hydrogen bonding and hydrogen tunneling: the upgraded LIM1 mechanism, *J. Phys. Chem. A*, 118, 8625–8643, doi:10.1021/JP5033146, 2014.
- Piesiak, A., Schuchmann, M. N., Zegota, H., and von Sonntag, C.:  $\beta$ -Hydroxyethylperoxyl radicals: a study of the  $\gamma$ -radiolysis and pulse radiolysis of ethylene in oxygenated aqueous solutions, *Z. Naturforsch. B*, 39, 1262–1267, doi:10.1515/ZNB-1984-0920, 1984.



- Platz, J., Nielsen, O. J., Wallington, T. J., Ball, J. C., Hurley, M. D., Straccia, A. M., Schneider, W. F., and Sehested, J.: Atmospheric chemistry of the phenoxy radical,  $\text{C}_6\text{H}_5\text{O}(\cdot)$ : UV spectrum and kinetics of its reaction with NO,  $\text{NO}_2$ , and  $\text{O}_2$ , *J. Phys. Chem. A*, 102, 7964–7974, doi:10.1021/JP982221L, 1998.
- Rickard, A.: The Master Chemical Mechanism (MCM), <http://mcm.york.ac.uk>, 2022.
- Rickard, A. R., Johnson, D., McGill, C. D., and Marston, G.: OH yields in the gas-phase reactions of ozone with alkenes, *J. Phys. Chem. A*, 103, 7656–7664, doi:10.1021/JP9916992, 1999.
- Roberts, J. M., Osthoff, H. D., Brown, S. S., and Ravishankara, A. R.:  $\text{N}_2\text{O}_5$  oxidizes chloride to  $\text{Cl}_2$  in acidic atmospheric aerosol, *Science*, 321, 1059, doi:10.1126/SCIENCE.1158777, 2008.
- Ross, A. B., Mallard, W. G., Helman, W. P., Bielski, B. H. J., Buxton, G. V., Cabelli, D. E., Greenstock, C. L., Huie, R. E., and Neta, P.: NDR-L-NIST Solution Kinetics Database: - Ver. 1, National Institute of Standards and Technology, Gaithersburg, MD, 1992.
- Roth, E., Chakir, A., and Ferhati, A.: Study of a benzoylperoxy radical in the gas phase: ultraviolet spectrum and  $\text{C}_6\text{H}_5\text{C}(\text{O})\text{O}_2 + \text{HO}_2$  reaction between 295 and 357 K, *J. Phys. Chem. A*, 114, 10367–10379, doi:10.1021/JP1021467, 2010.
- Rousse, D. and George, C.: A novel long path photolysis cell-application to the reactivity of selected organic compounds toward the nitrate radical ( $\text{NO}_3$ ), *Phys. Chem. Chem. Phys.*, 6, 3408–3414, doi:10.1039/B400175C, 2004.
- Rumble, J. R.: CRC Handbook of Chemistry and Physics, 101st Edition, CRC Press, Boca Raton, FL, 2020.
- Rush, J. D. and Bielski, B. H. J.: Pulse radiolytic studies of the reaction of  $\text{HO}_2/\text{O}_2^-$  with  $\text{Fe}(\text{II})/\text{Fe}(\text{III})$  ions. The reactivity of  $\text{HO}_2/\text{O}_2^-$  with ferric ions and its implication on the occurrence of the Haber-Weiss reaction, *J. Phys. Chem.*, 89, 5062–5066, doi:10.1021/J100269A035, 1985.
- Ryder, O. S., Campbell, N. R., Shaloski, M., Al-Mashat, H., Nathanson, G. M., and Bertram, T. H.: Role of organics in regulating  $\text{ClNO}_2$  production at the air-sea interface, *J. Phys. Chem. A*, 119, 8519–8526, doi:10.1021/JP5129673, 2015.
- Sampoli, M., De Santis, A., Marziano, N. C., Pinna, F., and Zingales, A.: Equilibria of nitric acid in sulfuric and perchloric acid at 25 °C by Raman and UV spectroscopy, *J. Phys. Chem.*, 89, 2864–2869, doi:10.1021/J100259A032, 1985.
- Sander, R., Jöckel, P., Kirner, O., Kunert, A. T., Landgraf, J., and Pozzer, A.: The photolysis module JVAL-14, compatible with the MESSy standard, and the JVal PreProcessor (JVPP), *Geosci. Model Dev.*, 7, 2653–2662, doi:10.5194/GMD-7-2653-2014, 2014.
- Sander, R., Baumgaertner, A., Cabrera-Perez, D., Frank, F., Gromov, S., Groöf, J.-U., Harder, H., Huijnen, V., Jöckel, P., Karydis, V. A., Niemeyer, K. E., Pozzer, A., Riede, H., Schultz, M. G., Taraborrelli, D., and Tauer, S.: The community atmospheric chemistry box model CAABA/MECCA-4.0, *Geosci. Model Dev.*, 12, 1365–1385, doi:10.5194/GMD-12-1365-2019, 2019.
- Schaefer, T., Schindelka, J., Hoffmann, D., and Herrmann, H.: Laboratory kinetic and mechanistic studies on the OH-initiated oxidation of acetone in aqueous solution, *J. Phys. Chem. A*, 116, 6317–6326, doi:10.1021/JP2120753, 2012.
- Schaefer, T., van Pinxteren, D., and Herrmann, H.: Multiphase chemistry of glyoxal: revised kinetics of the alkyl radical reaction with molecular oxygen and the reaction of glyoxal with OH,  $\text{NO}_3$ , and  $\text{SO}_4^-$  in aqueous solution, *Environ. Sci. Technol.*, 49, 343–350, doi:10.1021/ES505860S, 2015.
- Schöne, L. and Herrmann, H.: Kinetic measurements of the reactivity of hydrogen peroxide and ozone towards small atmospherically relevant aldehydes, ketones and organic acids in aqueous solutions, *Atmos. Chem. Phys.*, 14, 4503–4514, doi:10.5194/ACP-14-4503-2014, 2014.
- Schuchmann, M. N. and von Sonntag, C.: The rapid hydration of the acetyl radical. A pulse radiolysis study of acetaldehyde in aqueous solution., *J. Am. Chem. Soc.*, 110, 5698–5701, doi:10.1021/JA00225A019, 1988.
- Schuchmann, M. N., Zegota, H., and von Sonntag, C.: Acetate peroxy radicals,  $\cdot\text{O}_2\text{CH}_2\text{CO}_2^-$ : a study on the  $\gamma$ -radiolysis and pulse radiolysis of acetate in oxygenated aqueous solutions, *Z. Naturforsch. B*, 40, 215–221, doi:10.1515/ZNB-1985-0212, 1985.
- Schwartz, S. E. and White, W. H.: Solubility equilibria of the nitrogen oxides and oxyacids in dilute aqueous solution, in: *Advances in Environmental Science and Engineering*, edited by Pfafflin, J. R. and Ziegler, E. N., vol. 4, pp. 1–45, Gordon and Breach Science Publishers, NY, 1981.
- Schwarz, H. A. and Bielski, B. H. J.: Reactions of  $\text{HO}_2$  and  $\text{O}_2^-$  with iodine and bromine and the  $\text{I}_2^-$  and  $\text{I}$  atom reduction potentials, *J. Phys. Chem.*, 90, 1445–1448, doi:10.1021/J100398A045, 1986.
- Scribano, Y., Goldman, N., Saykally, R. J., and Leforestier, C.: Water dimers in the atmosphere III: Equilibrium constant from a flexible potential, *J. Phys.*

- Chem. A, 110, 5411–5419, doi:10.1021/JP056759K, 2006.
- Sehested, J., Christensen, L. K., Nielsen, O. J., Bilde, M., Wallington, T. J., Schneider, W. F., Orlando, J. J., and Tyndall, G. S.: Atmospheric chemistry of acetone: Kinetic study of the  $\text{CH}_3\text{C}(\text{O})\text{CH}_2\text{O}_2 + \text{NO}/\text{NO}_2$  reactions and decomposition of  $\text{CH}_3\text{C}(\text{O})\text{CH}_2\text{O}_2\text{NO}_2$ , *Int. J. Chem. Kinet.*, 30, 475–489, doi:10.1002/(SICI)1097-4601(1998)30:7<475::AID-KIN4>3.0.CO;2-P, 1998.
- Sehested, K., Rasmussen, O. L., and Fricke, H.: Rate constants of OH with  $\text{HO}_2$ ,  $\text{O}_2^-$ , and  $\text{H}_2\text{O}_2^+$  from hydrogen peroxide formation in pulse-irradiated oxygenated water, *J. Phys. Chem.*, 72, 626–631, doi:10.1021/J100848A040, 1968.
- Sehested, K., Holcman, J., Bjergbakke, E., and Hart, E. J.: A pulse radiolytic study of the reaction  $\text{OH} + \text{O}_3$  in aqueous medium, *J. Phys. Chem.*, 88, 4144–4147, doi:10.1021/J150662A058, 1984.
- Seinfeld, J. H. and Pandis, S. N.: *Atmospheric Chemistry and Physics*, John Wiley & Sons, Inc., 1998.
- Shallcross, D. E., Leather, K. E., Bacak, A., Xiao, P., Lee, E. P. F., Ng, M., Mok, D. K. W., Dyke, J. M., Hossaini, R., Chipperfield, M. P., Khan, M. A. H., and Percival, C. J.: Reaction between  $\text{CH}_3\text{O}_2$  and BrO radicals: a new source of upper troposphere lower stratosphere hydroxyl radicals, *J. Phys. Chem. A*, 119, 4618–4632, doi:10.1021/JP5108203, 2015.
- Shi, J. and Bernhard, M. J.: Kinetic studies of Cl-atom reactions with selected aromatic compounds using the photochemical reactor-FTIR spectroscopy technique, *Int. J. Chem. Kinet.*, 29, 349–358, doi:10.1002/(SICI)1097-4601(1997)29:5<349::AID-KIN5>3.0.CO;2-U, 1997.
- Shoute, L. C. T., Alfassi, Z. B., Neta, P., and Huie, R. E.: Temperature dependence of the rate constants for reaction of dihalide and azide radicals with inorganic reductants, *J. Phys. Chem.*, 95, 3238–3242, doi:10.1021/J100161A050, 1991.
- Sivakumaran, V., Hölscher, D., Dillon, T. J., and Crowley, J. N.: Reaction between OH and HCHO: temperature dependent rate coefficients (202–399 K) and product pathways (298 K), *Phys. Chem. Chem. Phys.*, 5, 4821–4827, doi:10.1039/B306859E, 2003.
- So, S., Wille, U., and da Silva, G.: Atmospheric chemistry of enols: a theoretical study of the vinyl alcohol + OH +  $\text{O}_2$  reaction mechanism, *Environ. Sci. Technol.*, 48, 6694–6701, doi:10.1021/ES500319Q, 2014.
- Sokolov, O., Hurley, M. D., Wallington, T. J., Kaiser, E. W., Platz, J., Nielsen, O. J., Berho, F., Rayez, M.-T., and Lesclaux, R.: Kinetics and mechanism of the gas-phase reaction of Cl atoms with benzene, *J. Phys. Chem. A*, 102, 10 671–10 681, doi:10.1021/JP9828080, 1998.
- Sokolov, O., Hurley, M. D., Ball, J. C., Wallington, T. J., Nelsen, W., Barnes, I., and Becker, K. H.: Kinetics of the reactions of chlorine atoms with  $\text{CH}_3\text{ONO}$  and  $\text{CH}_3\text{ONO}_2$ , *Int. J. Chem. Kinet.*, 31, 357–359, doi:10.1002/(SICI)1097-4601(1999)31:5<357::AID-KIN5>3.0.CO;2-6, 1999.
- Solberg, S., Stordal, F., and Hov, Ø.: Tropospheric ozone at high latitudes in clean and polluted air masses, a climatological study, *J. Atmos. Chem.*, 28, 111–123, doi:10.1023/A:1005766612853, 1997.
- Staehelin, J., Buehler, R. E., and Hoigné, J.: Ozone decomposition in water studied by pulse radiolysis. 2. Hydroxyl and hydrogen tetroxide ( $\text{HO}_4$ ) as chain intermediates, *J. Phys. Chem.*, 88, 5999–6004, doi:10.1021/J150668A051, 1984.
- Staudt, S., Gord, J. R., Karimova, N. V., McDuffie, E. E., Brown, S. S., Gerber, R. B., Nathanson, G. M., and Bertram, T. H.: Sulfate and carboxylate suppress the formation of  $\text{ClNO}_2$  at atmospheric interfaces, *Earth Space Chem.*, 3, 1987–1997, doi:10.1021/ACSEARTHSPACECHEM.9B00177, 2019.
- Stone, D., Blitz, M., Daubney, L., Howes, N. U. M., and Seakins, P.: Kinetics of  $\text{CH}_2\text{OO}$  reactions with  $\text{SO}_2$ ,  $\text{NO}_2$ , NO,  $\text{H}_2\text{O}$  and  $\text{CH}_3\text{CHO}$  as a function of pressure, *Phys. Chem. Chem. Phys.*, 16, 1139–1149, doi:10.1039/C3CP54391A, 2014.
- Strekowski, R. S., Nicovich, J. M., and Wine, P. H.: Kinetic and mechanistic study of the Reactions of  $\text{O}(^1\text{D}_2)$  with HCN and  $\text{CH}_3\text{CN}$ , *Chem. Phys. Chem.*, 11, 3942–3955, doi:10.1002/CPHC.201000550, 2010.
- Sutton, H. C. and Downes, M. T.: Reactions of the  $\text{HO}_2$  radical in aqueous solution with bromine and related compounds, *J. Chem. Soc. Faraday Trans. 1*, 68, 1498–1507, doi:10.1039/F19726801498, 1972.
- Tao, Z. and Li, Z.: A kinetics study on reactions of  $\text{C}_6\text{H}_5\text{O}$  with  $\text{C}_6\text{H}_5\text{O}$  and  $\text{O}_3$  at 298 K, *Int. J. Chem. Kinet.*, 31, 65–72, doi:10.1002/(SICI)1097-4601(1999)31:1<65::AID-KIN8>3.0.CO;2-J, 1999.
- Taraborrelli, D.: Isoprene oxidation and its impacts on the atmospheric composition, Ph.D. thesis, Johannes Gutenberg-Universität, Mainz, Germany, <http://d-nb.info/1003538770/34>, 2010.
- Taraborrelli, D., Lawrence, M. G., Butler, T. M., Sander, R., and Lelieveld, J.: Mainz Isoprene Mechanism 2 (MIM2): an isoprene oxidation mechanism for regional and global atmospheric modelling,

- Atmos. Chem. Phys., 9, 2751–2777, doi:10.5194/ACP-9-2751-2009, 2009.
- Thiault, G., Mellouki, A., and Bras, G. L.: Kinetics of gas phase reactions of OH and Cl with aromatic aldehydes, Phys. Chem. Chem. Phys., 4, 2194–2199, doi:10.1039/b200609j, 2002.
- Thornton, A. T. and Laurence, G. S.: Kinetics of oxidation of transition-metal ions by halogen radical anions. Part I. The oxidation of iron(II) by dibromide and dichloride ions generated by flash photolysis, J. Chem. Soc. Dalton Trans., pp. 804–813, doi:10.1039/DT9730000804, 1973.
- Troy, R. C. and Margerum, D. W.: Non-metal redox kinetics: Hypobromite and hypobromous acid reactions with iodide and with sulfite and the hydrolysis of bromosulfate, Inorg. Chem., 30, 3538–3543, doi:10.1021/IC00018A028, 1991.
- Tur’yan, Y. I.: Studying kinetics of the dehydration reaction of acetaldehyde in aqueous solutions using polarographic kinetic currents, Croatica Chem. Acta, 73, 657–666, <https://hrcak.srce.hr/132008>, 2000.
- Tyndall, G. S., Staffelbach, T. A., Orlando, J. J., and Calvert, J. G.: Rate coefficients for the reactions of OH radicals with methylglyoxal and acetaldehyde, Int. J. Chem. Kinet., 27, 1009–1020, doi:10.1002/KIN.550271006, 1995.
- Tyndall, G. S., Orlando, J. J., Wallington, T. J., Sehested, J., and Nielsen, O. J.: Kinetics of the reactions of acetonitrile with chlorine and fluorine atoms, J. Phys. Chem., 100, 660–668, doi:10.1021/JP9521417, 1996.
- Tyndall, G. S., Cox, R. A., Granier, C., Lesclaux, R., Moortgat, G. K., Pilling, M. J., Ravishankara, A. R., and Wallington, T. J.: Atmospheric chemistry of small organic peroxy radicals, J. Geophys. Res., 106D, 12 157–12 182, doi:10.1029/2000JD900746, 2001a.
- Tyndall, G. S., Orlando, J. J., Wallington, T. J., and Hurley, M. D.: Products of the chlorine-atom- and hydroxyl-radical-initiated oxidation of CH<sub>3</sub>CN, J. Phys. Chem. A, 105, 5380–5384, doi:10.1021/JP004318P, 2001b.
- Vereecken, L. and Francisco, J. S.: Theoretical studies of atmospheric reaction mechanisms in the troposphere, Chem. Soc. Rev., 41, 6259–6293, doi:10.1039/C2CS35070J, 2012.
- Vereecken, L. and Peeters, J.: A theoretical study of the OH-initiated gas-phase oxidation mechanism of  $\beta$ -pinene (C<sub>10</sub>H<sub>16</sub>): first generation products, Phys. Chem. Chem. Phys., 14, 3802–3815, doi:10.1039/C2CP23711C, 2012.
- Vereecken, L., Müller, J.-F., and Peeters, J.: Low-volatility poly-oxygenates in the OH-initiated atmospheric oxidation of  $\alpha$ -pinene: impact of non-traditional peroxy radical chemistry, Phys. Chem. Chem. Phys., 9, 5241–5248, doi:10.1039/B708023A, 2007.
- Vereecken, L., Harder, H., and Novelli, A.: The reaction of Criegee intermediates with NO, RO<sub>2</sub>, and SO<sub>2</sub>, and their fate in the atmosphere, Phys. Chem. Chem. Phys., 14, 14 682–14 695, doi:10.1039/C2CP42300F, 2012.
- Vereecken, L., Harder, H., and Novelli, A.: The reactions of Criegee intermediates with alkenes, ozone, and carbonyl oxides, Phys. Chem. Chem. Phys., 16, 4039–4049, doi:10.1039/C3CP54514H, 2014.
- Villalta, P. W., Lovejoy, E. R., and Hanson, D. R.: Reaction probability of peroxyacetyl radical on aqueous surfaces, Geophys. Res. Lett., 23, 1765–1768, doi:10.1029/96GL01286, 1996.
- von Kuhlmann, R.: Tropospheric photochemistry of ozone, its precursors and the hydroxyl radical: A 3D-modeling study considering non-methane hydrocarbons, Ph.D. thesis, Johannes Gutenberg-Universität, Mainz, Germany, 2001.
- von Kuhlmann, R., Lawrence, M. G., Crutzen, P. J., and Rasch, P. J.: A model for studies of tropospheric ozone and nonmethane hydrocarbons: Model description and ozone results, J. Geophys. Res., 108D, 4294, doi:10.1029/2002JD002893, 2003.
- von Sonntag, C.: The chemical basis of radiation biology, Taylor & Francis London, 1987.
- Wagner, I. and Strehlow, H.: On the flash photolysis of bromide ions in aqueous solution, Ber. Bunsenges. Phys. Chem., 91, 1317–1321, doi:10.1002/BBPC.19870911203, 1987.
- Wallington, T. J., Ammann, M., Cox, R. A., Crowley, J. N., Herrmann, H., Jenkin, M. E., McNeill, V. F., Mellouki, A., Rossi, M. J., and Troe, J.: IUPAC Task group on atmospheric chemical kinetic data evaluation: Evaluated kinetic data, <http://iupac.pole-ether.fr>, 2018.
- Wang, L., Arey, J., and Atkinson, R.: Reactions of chlorine atoms with a series of aromatic hydrocarbons, Environ. Sci. Technol., 39, 5302–5310, doi:10.1021/ES0479437, 2005.

- Wang, T. X. and Margerum, D. W.: Kinetics of reversible chlorine hydrolysis: Temperature dependence and general-acid/base-assisted mechanisms, *Inorg. Chem.*, 33, 1050–1055, doi:10.1021/IC00084A014, 1994.
- Wang, T. X., Kelley, M. D., Cooper, J. N., Beckwith, R. C., and Margerum, D. W.: Equilibrium, kinetic, and UV-spectral characteristics of aqueous bromine chloride, bromine, and chlorine species, *Inorg. Chem.*, 33, 5872–5878, doi:10.1021/IC00103A040, 1994.
- Warneck, P.: Chemical reactions in clouds, *Frese-  
nius J. Anal. Chem.*, 340, 585–590, doi:10.1007/  
BF00322434, 1991.
- Warneck, P.: The relative importance of various path-  
ways for the oxidation of sulfur dioxide and nitro-  
gen dioxide in sunlit continental fair weather clouds,  
*Phys. Chem. Chem. Phys.*, 1, 5471–5483, doi:10.  
1039/A906558J, 1999.
- Warneck, P.: The oxidation of sulfur(IV) by reac-  
tion with iron(III): a critical review and data anal-  
ysis, *Phys. Chem. Chem. Phys.*, 20, 4020–4037, doi:  
10.1039/C7CP07584G, 2018.
- Weast, R. C.: *CRC Handbook of Chemistry and  
Physics*, 61st Edition, CRC Press, Inc., Boca Raton,  
FL, 1980.
- Weinstein-Lloyd, J. and Schwartz, S. E.: Low-intensity  
radiolysis study of free-radical reactions in cloudwa-  
ter:  $\text{H}_2\text{O}_2$  production and destruction, *Environ. Sci.  
Technol.*, 25, 791–800, doi:10.1021/ES00016A027,  
1991.
- Welz, O., Savee, J. D., Osborn, D. L., Vasu, S. S., Per-  
cival, C. J., Shallcross, D. E., and Taatjes, C. A.:  
Direct kinetic measurements of Criegee intermediate  
( $\text{CH}_2\text{OO}$ ) formed by reaction of  $\text{CH}_2\text{I}$  with  $\text{O}_2$ , *Sci-  
ence*, 335, 204–207, doi:10.1126/SCIENCE.1213229,  
2012.
- Welz, O., Eskola, A. J., Sheps, L., Rotavera, B., Savee,  
J. D., Scheer, A. M., Osborn, D. L., Lowe, D.,  
Booth, A. M., Xiao, P., Khan, M. A. H., Percival,  
C. J., Shallcross, D. E., and Taatjes, C. A.: Rate  
coefficients of C1 and C2 Criegee intermediate re-  
actions with formic and acetic acid near the colli-  
sion limit: Direct kinetics measurements and atmo-  
spheric implications, *Angew. Chem.*, 126, 4635–4638,  
doi:10.1002/ANGE.201400964, 2014.
- Wennberg, P. O., Bates, K. H., Crounse, J. D., Dod-  
son, L. G., McVay, R. C., Mertens, L. A., Nguyen,  
T. B., Praske, E., Schwantes, R. H., Smarte, M. D.,  
St Clair, J. M., Teng, A. P., Zhang, X., and Seinfeld,  
J. H.: Gas-phase reactions of isoprene and its ma-  
jor oxidation products, *Chem. Rev.*, 118, 3337–3390,  
doi:10.1021/ACS.CHEMREV.7B00439, 2018.
- Wine, P. H., Tang, Y., Thorn, R. P., Wells, J. R., and  
Davis, D. D.: Kinetics of aqueous phase reactions of  
the  $\text{SO}_4^-$  radical with potential importance in cloud  
chemistry, *J. Geophys. Res.*, 94D, 1085–1094, doi:  
10.1029/JD094ID01P01085, 1989.
- Wingenter, O. W., Sive, B. C., Blake, N. J., and Row-  
land, F. S.: Atomic chlorine concentrations deter-  
mined from ethane and hydroxyl measurements made  
over the Central Pacific Ocean, *Eos, Trans. AGU  
(Abstract Supplement)*, 80, F149–F150, 1999.
- Winkelman, J. G. M., Ottens, M., and Beenackers, A.  
A. C. M.: The kinetics of the dehydration of methy-  
lene glycol, *Chem. Eng. Sci.*, 55, 2065–2071, doi:  
10.1016/S0009-2509(99)00498-4, 2000.
- Winkelman, J. G. M., Voorwinde, O. K., Ottens, M.,  
Beenackers, A. A. C. M., and Janssen, L. P. B. M.:  
Kinetics and chemical equilibrium of the hydration of  
formaldehyde, *Chem. Eng. Sci.*, 57, 4067–4076, doi:  
10.1016/S0009-2509(02)00358-5, 2002.
- Wu, D., Wong, D., and Di Bartolo, B.: Evolution of  
 $\text{Cl}_2^-$  in aqueous NaCl solutions, *J. Photochem.*, 14,  
303–310, doi:10.1016/0047-2670(80)85102-1, 1980.
- Yamamoto, S. and Back, R. A.: The gas-phase photo-  
chemistry of oxalic acid, *J. Phys. Chem.*, 89, 622–625,  
doi:10.1021/J100250A014, 1985.
- Yin, F., Grosjean, D., and Seinfeld, J. H.: Photooxi-  
dation of dimethyl sulfide and dimethyl disulfide. I:  
Mechanism development, *J. Atmos. Chem.*, 11, 309–  
364, doi:10.1007/BF00053780, 1990.
- Yoon, M.-C., Choi, Y. S., and Kim, S. K.: The OH  
production from the  $\pi - \pi^*$  transition of acetylac-  
etone, *Chem. Phys. Lett.*, 300, 207–212, doi:10.1016/  
S0009-2614(98)01373-6, 1999.
- Yu, X.-Y.: Critical evaluation of rate constants and  
equilibrium constants of hydrogen peroxide photol-  
ysis in acidic aqueous solutions containing chloride  
ions, *J. Phys. Chem. Ref. Data*, 33, 747–763, doi:  
10.1063/1.1695414, 2004.
- Zegota, H., Schuchmann, M. N., Schulz, D.,  
and von Sonntag, C.: Acetonylperoxyl radicals,  
 $\text{CH}_3\text{COCH}_2\text{O}_2$ : a study on the  $\gamma$ -radiolysis and  
pulse radiolysis of acetone in oxygenated aqueous  
solutions, *Z. Naturforsch. B*, 41, 1015–1022, doi:  
10.1515/ZNB-1986-0815, 1986.
- Zehavi, D. and Rabani, J.: The oxidation of aque-  
ous bromide by hydroxyl radicals. A pulse radi-  
olytic investigation, *J. Phys. Chem.*, 76, 312–319, doi:  
10.1021/J100647A006, 1972.

- Zellner, R., Hartmann, D., Karthäuser, J., Rhäsa, D., and Weibring, G.: A laser photolysis/LIF study of the reactions of  $O(^3P)$  atoms with  $CH_3$  and  $CH_3O_2$  radicals, *J. Chem. Soc. Faraday Trans. 2*, 84, 549–568, doi:10.1039/F29888400549, 1988.
- Zellner, R., Exner, M., and Herrmann, H.: Absolute OH quantum yield in the laser photolysis of nitrate, nitrite and dissolved  $H_2O_2$  at 308 and 351 nm in the temperature range 278–353 K, *J. Atmos. Chem.*, 10, 411–425, doi:10.1007/BF00115783, 1990.
- Zellner, R., Herrmann, H., Exner, M., Jacobi, H.-W., Raabe, G., and Reese, A.: Formation and reactions of oxidants in the aqueous phase, in: *Heterogeneous and Liquid-Phase Processes*, edited by Warneck, P., pp. 146–152, Springer Verlag, Berlin, 1996.
- Ziajka, J., Beer, F., and Warneck, P.: Iron-catalysed oxidation of bisulphit aqueous solution: evidence for free radical chain mechanism, *Atmos. Environ.*, 28, 2549–2552, doi:10.1016/1352-2310(94)90405-7, 1994.
