# Supplementary material for: Comprehensive multiphase chlorine chemistry in the box model CAABA/MECCA: Implications to atmospheric oxidative capacity
Source: Copernicus journal article supplement (doi:10.5194/egusphere-2023-652), 2023-04-26
Supplement: Supplementary file 2 [file egusphere-2023-652-supplement.zip]

# Comprehensive multiphase chlorine chemistry in the box model CAABA/MECCA: Implications to atmospheric oxidative capacity

Meghna Soni<sup>1,2</sup>, Rolf Sander<sup>3</sup>, Lokesh K. Sahu<sup>1</sup>, Domenico Taraborrelli<sup>4</sup>,  
Pengei Liu<sup>5</sup>, Ankit Patel<sup>6</sup>, Imran A Girach<sup>7</sup>, Andrea Pozzer<sup>3,8</sup>,  
Sachin S Gunthe<sup>6,9</sup>, Narendra Ojha<sup>1</sup>

<sup>1</sup> Physical Research Laboratory, Ahmedabad, India

<sup>2</sup> Indian Institute of Technology, Gandhinagar, Gujarat, India

<sup>3</sup> Atmospheric Chemistry Department, Max Planck Institute for Chemistry, Mainz, Germany

<sup>4</sup> Institute of Energy and Climate Research, Troposphere (IEK-8), Forschungszentrum Jülich GmbH, Jülich, Germany

<sup>5</sup> School of Earth and Atmospheric Sciences, Georgia Institute of Technology, Atlanta, GA, USA

<sup>6</sup> EWRE Division, Department of Civil Engineering, Indian Institute of Technology Madras, Chennai, India

<sup>7</sup> Space Applications Centre, Indian Space Research Organisation, Ahmedabad, India

<sup>8</sup> Climate and Atmosphere Research Center, The Cyprus Institute, Nicosia, Cyprus

<sup>9</sup> Laboratory for Atmospheric and Climate Sciences, Indian Institute of Technology Madras, Chennai, India

## 1 Model inputs

Initial concentrations of CO, CH<sub>4</sub>, NO<sub>x</sub>, non-methane hydrocarbons (NMHCs), various VOCs and aerosol properties considered for simulations over both the locations are described in Table 1 S1. The levels of gas-phase chemical species in Delhi are based on a recent field campaign conducted at Indian Institute of Delhi (IITD) during winter season of 2018 [1]. In addition to listed species in table 3 for Delhi, additional chemical species are considered for simulations which include acetone (9 nmol/mol), methanol (12 nmol/mol), acetaldehyde (6.1 nmol/mol), acetonitrile (7.5 nmol/mol), methyl ethyl ketone (1.3 nmol/mol), styrene (1.4 nmol/mol), pinene (0.14 nmol/mol), formaldehyde (1.8 nmol/mol), ethanol (1.7 nmol/mol), acetic acid (6 nmol/mol), propanol (0.4 nmol/mol), methyl vinyl ketone (0.3 nmol/mol), NH<sub>3</sub> (25.1 nmol/mol) and SO<sub>2</sub> (2.1 nmol/mol) [1–4]. Measurements of aerosols (stated in Table 1) has been carried out in another field campaign during February 2018–January 2019 in Delhi [5]. The concentration of gaseous species in Leicester are from Sommariva et al., 2018 and 2021 [6, 7]. The aerosol properties are based on previously reported studies.

Table S1: Initial values of various gases (in nmol/mol) and aerosols opted for simulations over Delhi and Leicester.

| Species                                                | Delhi     | Leicester |
|--------------------------------------------------------|-----------|-----------|
| Ozone                                                  | 26        | 20        |
| Nitrogen oxides                                        | 154       | 19        |
| Carbon monoxide                                        | 1340      | 140       |
| Methane                                                | 2250      | 1900      |
| Ethane                                                 | 20        | 6.3       |
| Ethene                                                 | 14        | 0.67      |
| Propane                                                | 29        | 2.30      |
| Propene                                                | 4         | 0.19      |
| i-Butane                                               | 11        | 0.59      |
| n-butane                                               | 22        | 0.97      |
| Acetylene                                              | 10        | 0.49      |
| Toluene                                                | 5.13      | 0.19      |
| Benzene                                                | 2.81      | 0.20      |
| Isoprene                                               | 0.80      | 0.02      |
| Xylene                                                 | 3.13      | 0.16      |
| Ethyl benzene                                          | 0.667     | 0.03      |
| 1,2,4-Trimethyl Benzene (TMB)                          | 0.834     | 0.05      |
| 1,3,5- TMB                                             | 0.427     | 0.02      |
| H <sub>2</sub> O (mol/mol)                             | 0.0146    | 0.0055    |
| Radius ( $\mu\text{m}$ )                               | 0.11      | 0.15      |
| Liquid water content ( $\text{m}^3/\text{m}^3$ )       | 22.77E-12 | 1.2E-10   |
| NO <sub>3</sub> <sup>-</sup> (molec/cm <sup>3</sup> )  | 3.59E10   | 1.2E10    |
| SO <sub>4</sub> <sup>2-</sup> (molec/cm <sup>3</sup> ) | 2.45E10   | 7.4E9     |
| NH <sub>4</sub> <sup>+</sup> (molec/cm <sup>3</sup> )  | 1.62E11   | 5.0E10    |
| Cl <sup>-</sup> (molec/cm <sup>3</sup> )               | 1.01E11   | 3.4E9     |

## 2 Results

### 2.1 Cl<sub>2</sub> budget

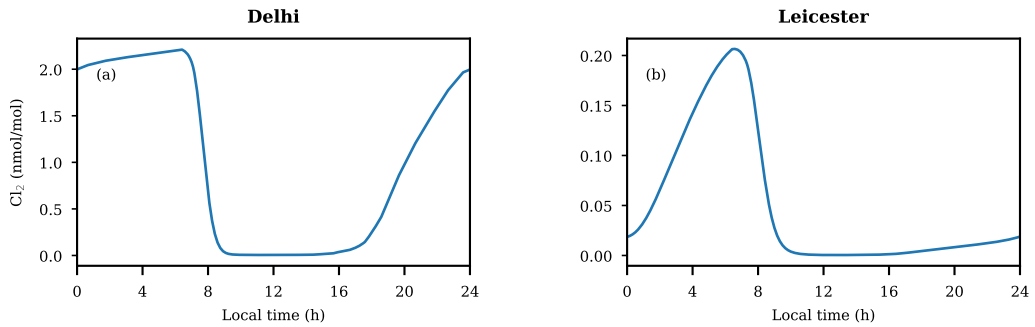

Figure S1: Diurnal variation in Cl<sub>2</sub> over (left panel) Delhi and (right panel) Leicester.

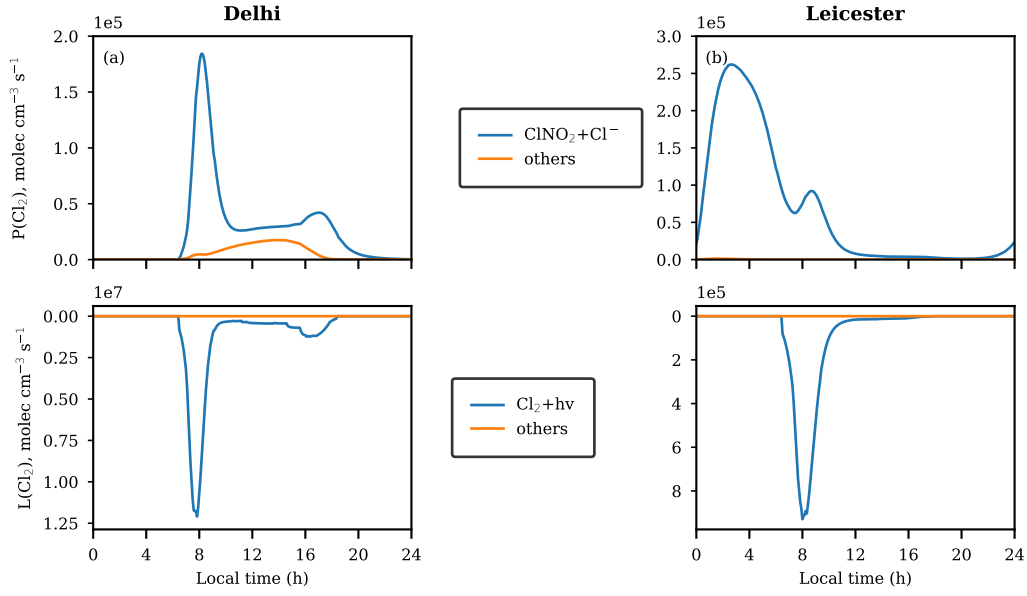

Figure S2: Production and loss of  $\text{Cl}_2$  over (left panel) Delhi and (right panel) Leicester.

## 2.2 $\text{ClNO}_2$ yield

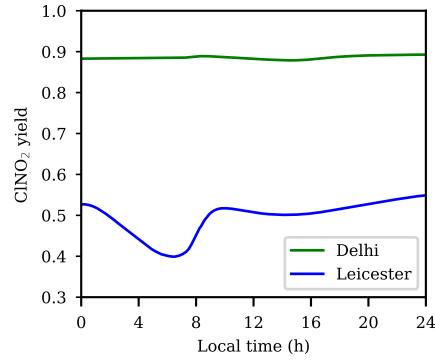

Figure S3: Model simulated  $\text{ClNO}_2$  yield in Delhi and Leicester.

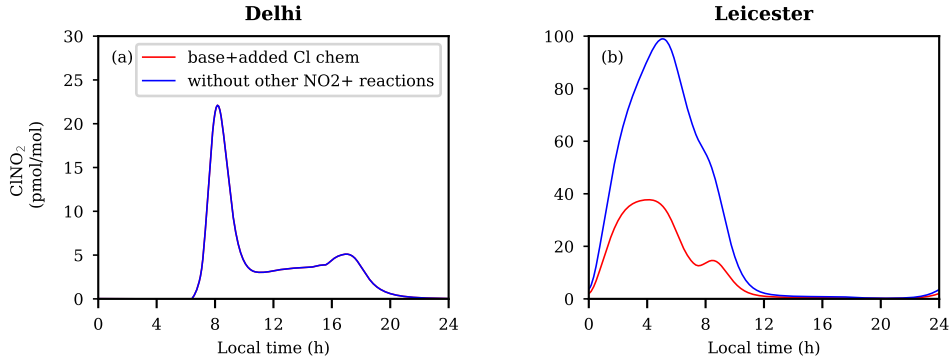

Figure S4: Diurnal variation in  $\text{ClNO}_2$  over (a) Delhi and (b) Leicester.

## 2.3 Sensitivity of air composition to chlorine chemistry

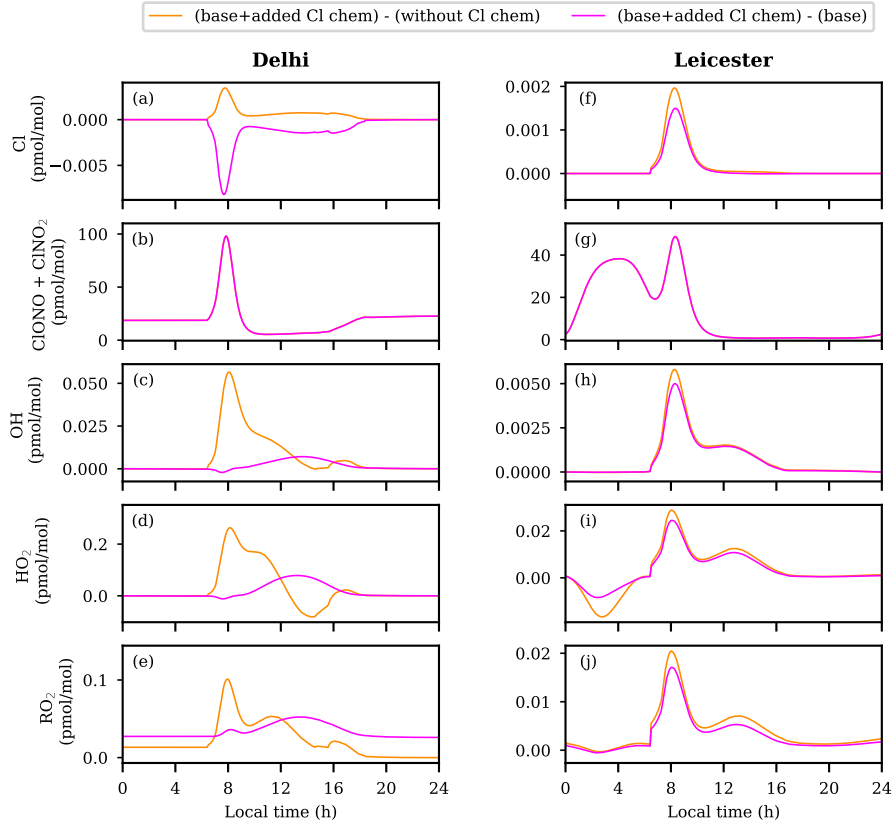

Figure S5: Differences in diurnal variation of Cl,  $\text{ClONO}_2 + \text{ClONO}$ , OH,  $\text{HO}_2$ , and  $\text{RO}_2$  in model simulations over (left panel) Delhi and (right panel) Leicester.

In addition to the gas-phase composition, Cl chemistry also alters the levels of inorganic aerosol species at both locations, including the nitronium ion ( $\text{NO}_2^+$ ), nitrate ( $\text{NO}_3^-$ ), and oxalic acid (Fig.S6). The diurnal pattern of  $\text{NO}_2^+$  is similar to that of  $\text{N}_2\text{O}_5$  because dissociation of  $\text{N}_2\text{O}_5$  is the major source of  $\text{NO}_2^+$  production (A1). Chlorine chemistry (base+added Cl chem simulation) reduces the modeled concentration of  $\text{NO}_2^+$  by up to a factor of  $\approx 8$  and  $\approx 2$  in Delhi and Leicester, respectively, compared to without Cl chem simulation. Simulated  $\text{NO}_3^-$  is higher by upto 1.2 times over Delhi due to Cl chemistry. The measured mean  $\text{NO}_3^-$  over Delhi during high chloride period in winter-time is  $5.3 \pm 3.2 \text{ ug/m}^{-3}$  [5]. Simulated  $\text{NO}_3^-$  is higher by upto 1.4 times with the added Cl chemistry (base+added Cl chem) as compared to base run over Leicester. Simulated oxalic acid seems to be significantly higher due to Cl chemistry over Delhi and Leicester.

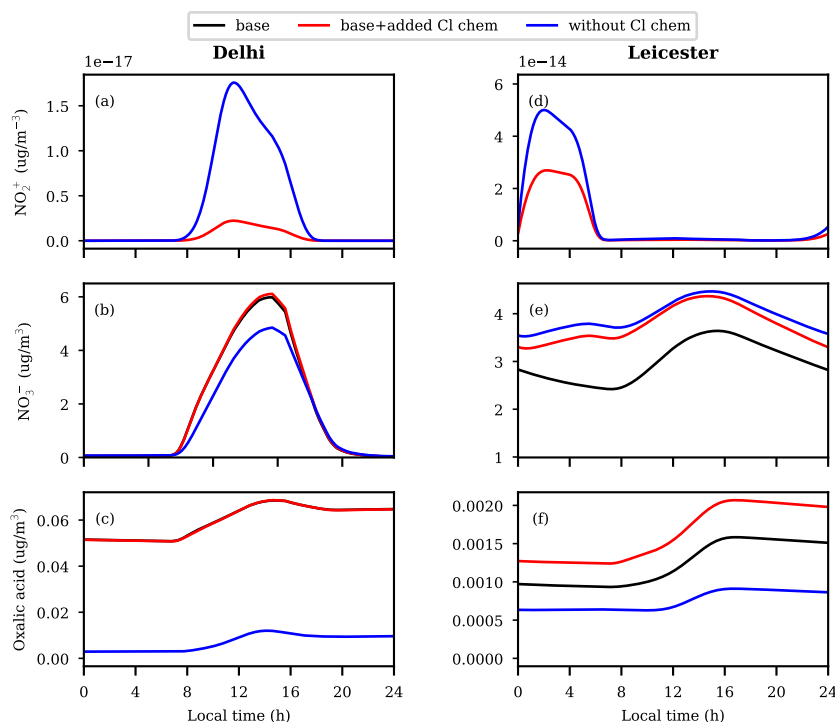

Figure S6: Impact of Cl chemistry on aerosols over (left panel) Delhi and (right panel) Leicester.

## References

- [1] Tripathi, N., Sahu, L. K., Wang, L., Vats, P., Soni, M., Kumar, P., et al., Characteristics of VOC composition at urban and suburban sites of New Delhi, India in winter. *Journal of Geophysical Research: Atmospheres*, 127, e2021JD035342, <https://doi.org/10.1029/2021JD035342>, 2022
- [2] Kumar, A., Singh, D., Kumar, K., Singh, B., Jain, V., Distribution of VOCs in urban and rural atmospheres of subtropical India: Temporal variation, source attribution, ratios, OFP and risk assessment, *The Science of the total environment*, 613-614:492-501,doi: 10.1016/j.scitotenv.2017.09.096, 2017
- [3] Wang, L., Slowik, J. G., Tripathi, N., Bhattu, D., Rai, P., Kumar, V., Vats, P., Satish, R., Baltensperger, U., Ganguly, D., Rastogi, N., Sahu, L. K., Tripathi, S. N., and Prévôt, A. S. H.: Source characterization of volatile organic compounds measured by proton-transfer-reaction time-of-flight mass spectrometers in Delhi, India, *Atmos. Chem. Phys.*, 20, 9753–9770, <https://doi.org/10.5194/acp-20-9753-2020>, 2020.
- [4] Suneja, J., Kotnala, G., Kaur, A., Mandal, T., Sharma, S. K., Long-Term Measurements of SO<sub>2</sub> Over Delhi, India. *MAPAN-Journal of Metrology Society of India*, 35, 125-133, doi:10.1007/s12647-019-00349-1, 2020
- [5] Gunthe S.S., Liu P., Panda U. et al., Enhanced aerosol particle growth sustained by high continental chlorine emission in India. *Nat. Geosci.*, 14, 77–84, <https://doi.org/10.1038/s41561-020-00677-x>, 2021
- [6] Sommariva, R., Crilley, L. R., Ball, S. M., Cordell, R. L., Hollis, L. D. J., Bloss, W. J., Monks, P. S., Enhanced wintertime oxidation of VOCs via sustained radical sources in the urban atmosphere, *Environmental Pollution*, 274, <https://doi.org/10.1016/j.envpol.2021.116563>, 2021

- [7] Sommariva, R., Hollis, L.D.J., Sherwen, T., Baker, A.R., Ball, S.M., Bandy, B.J., Bell, T.G., Chowdhury, M.N., Cordell, R.L., Evans, M.J., Lee, J.D., Reed, C., Reeves, C.E., Roberts, J.M., Yang, M., Monks, P.S., Seasonal and geographical variability of nitryl chloride and its precursors in Northern Europe. *Atmos. Sci. Lett.*, 19, <https://doi.org/10.1002/asl.844.30>, 2018
